# Supplementary material for: 1-(3-(2-(Dimethylammonio)ethyl)-1H-indol-5-yl)- N-Methylmethanesulfonamide Succinate Hemi(Ethanol Solvate)
Source: Preprints.org preprint supplement (doi:10.20944/preprints202312.1010.v1), 2023-12-13

---

The following ALERTS were generated. Each ALERT has the format

**test-name\_ALERT\_alert-type\_alert-level.**

Click on the hyperlinks for more details of the test.

---

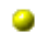

### Alert level C

PLAT034\_ALERT\_1\_C No Flack Parameter Given. Z > Si, NonCentro .... Please Do !

**Author Response: Flack for a twinned crystal coincides with BASF. Hooft is equal to -0.05(5).**

PLAT250\_ALERT\_2\_C Large U3/U1 Ratio for Average U(i,j) Tensor .... 2.1 Note  
PLAT340\_ALERT\_3\_C Low Bond Precision on C-C Bonds ..... 0.00424 Ang.  
PLAT911\_ALERT\_3\_C Missing FCF Refl Between Thmin & STh/L= 0.600 69 Report

|    |   |    |     |    |     |    |   |     |    |   |    |     |   |    |     |    |    |
|----|---|----|-----|----|-----|----|---|-----|----|---|----|-----|---|----|-----|----|----|
| 9  | 0 | 0, | 10  | 0  | 0,  | 11 | 0 | 0,  | 9  | 1 | 0, | 10  | 1 | 0, | 11  | 1  | 0, |
| 10 | 2 | 0, | 11  | 2  | 0,  | 10 | 3 | 0,  | 11 | 3 | 0, | 11  | 4 | 0, | -11 | 1  | 1, |
| 7  | 1 | 1, | 8   | 1  | 1,  | 9  | 1 | 1,  | 10 | 1 | 1, | 11  | 1 | 1, | -11 | 2  | 1, |
| 8  | 2 | 1, | 9   | 2  | 1,  | 10 | 2 | 1,  | 11 | 2 | 1, | -11 | 3 | 1, | 10  | 3  | 1, |
| 11 | 3 | 1, | -11 | 0  | 2,  | 7  | 0 | 2,  | 8  | 0 | 2, | 9   | 0 | 2, | 10  | 0  | 2, |
| 11 | 0 | 2, | 7   | 1  | 2,  | 8  | 1 | 2,  | 9  | 1 | 2, | 10  | 1 | 2, | 11  | 1  | 2, |
| 9  | 2 | 2, | 10  | 2  | 2,  | 11 | 2 | 2,  | 11 | 3 | 2, | -1  | 9 | 2, | -1  | 10 | 2, |
| 7  | 1 | 3, | 8   | 1  | 3,  | 9  | 1 | 3,  | 10 | 1 | 3, | 11  | 1 | 3, | 9   | 2  | 3, |
| 10 | 2 | 3, | 11  | 2  | 3,  | 7  | 0 | 4,  | 8  | 0 | 4, | 9   | 0 | 4, | 10  | 0  | 4, |
| 11 | 0 | 4, | 8   | 1  | 4,  | 9  | 1 | 4,  | 10 | 1 | 4, | 11  | 1 | 4, | 9   | 2  | 4, |
| 10 | 2 | 4, | -3  | 10 | 4,  | 9  | 1 | 5,  | 10 | 1 | 5, | 8   | 0 | 6, | 9   | 0  | 6, |
| 10 | 0 | 6, | 6   | 0  | 12, | 8  | 0 | 12, |    |   |    |     |   |    |     |    |    |

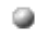

### Alert level G

PLAT002\_ALERT\_2\_G Number of Distance or Angle Restraints on AtSite 18 Note  
PLAT172\_ALERT\_4\_G The CIF-Embedded .res File Contains DFIX Records 2 Report  
PLAT720\_ALERT\_4\_G Number of Unusual/Non-Standard Labels ..... 21 Note

|      |      |      |      |      |      |      |      |
|------|------|------|------|------|------|------|------|
| H1AA | H2AA | H1AB | H1AC | H1AD | H2AB | H2AC | H2BA |
| H2BB | H3BA | H3BB | H2CA | H2CB | C3BC | H3BC | H3BD |
| H1SA | H1SB | H2SA | H2SB | H2SC |      |      |      |

PLAT860\_ALERT\_3\_G Number of Least-Squares Restraints ..... 11 Note  
PLAT883\_ALERT\_1\_G No Info/Value for \_atom\_sites\_solution\_primary . Please Do !  
PLAT910\_ALERT\_3\_G Missing # of FCF Reflection(s) Below Theta(Min). 1 Note

|   |   |    |
|---|---|----|
| 0 | 1 | 0, |
|---|---|----|

PLAT912\_ALERT\_4\_G Missing # of FCF Reflections Above STh/L= 0.600 149 Note  
PLAT915\_ALERT\_3\_G No Flack x Check Done: Low Friedel Pair Coverage 60 %  
PLAT941\_ALERT\_3\_G Average HKL Measurement Multiplicity ..... 3.5 Low  
PLAT978\_ALERT\_2\_G Number C-C Bonds with Positive Residual Density. 11 Info

- 
- 0 **ALERT level A** = Most likely a serious problem - resolve or explain  
0 **ALERT level B** = A potentially serious problem, consider carefully  
4 **ALERT level C** = Check. Ensure it is not caused by an omission or oversight  
10 **ALERT level G** = General information/check it is not something unexpected
- 2 ALERT type 1 CIF construction/syntax error, inconsistent or missing data  
3 ALERT type 2 Indicator that the structure model may be wrong or deficient  
6 ALERT type 3 Indicator that the structure quality may be low  
3 ALERT type 4 Improvement, methodology, query or suggestion  
0 ALERT type 5 Informative message, check

---

---

It is advisable to attempt to resolve as many as possible of the alerts in all categories. Often the minor alerts point to easily fixed oversights, errors and omissions in your CIF or refinement strategy, so attention to these fine details can be worthwhile. In order to resolve some of the more serious problems it may be necessary to carry out additional measurements or structure refinements. However, the purpose of your study may justify the reported deviations and the more serious of these should normally be commented upon in the discussion or experimental section of a paper or in the "special\_details" fields of the CIF. checkCIF was carefully designed to identify outliers and unusual parameters, but every test has its limitations and alerts that are not important in a particular case may appear. Conversely, the absence of alerts does not guarantee there are no aspects of the results needing attention. It is up to the individual to critically assess their own results and, if necessary, seek expert advice.

### **Publication of your CIF in IUCr journals**

A basic structural check has been run on your CIF. These basic checks will be run on all CIFs submitted for publication in IUCr journals (*Acta Crystallographica*, *Journal of Applied Crystallography*, *Journal of Synchrotron Radiation*); however, if you intend to submit to *Acta Crystallographica Section C* or *E* or *IUCrData*, you should make sure that full publication checks are run on the final version of your CIF prior to submission.

### **Publication of your CIF in other journals**

Please refer to the *Notes for Authors* of the relevant journal for any special instructions relating to CIF submission.

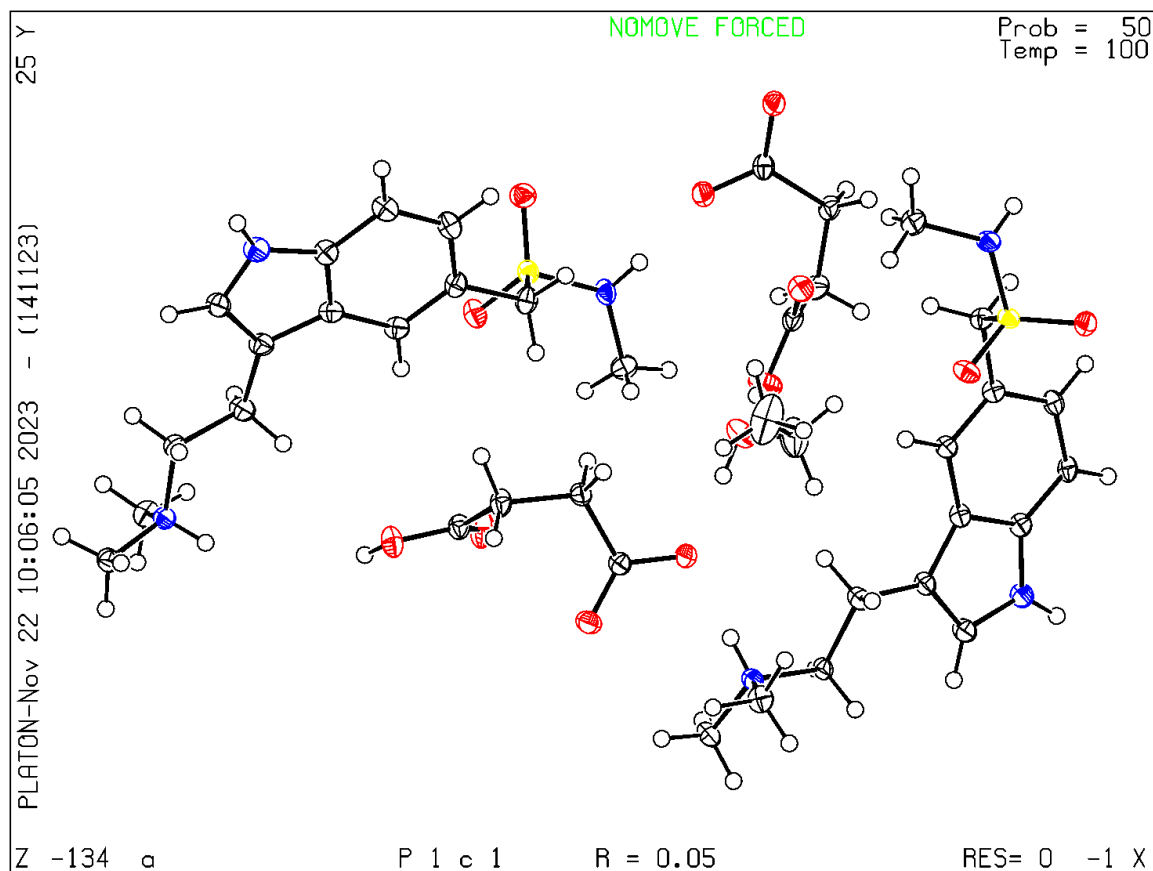

Supplement: Supplementary file 2 [file supplementary]
