# Supplementary material for: 1-(3-(2-(Dimethylammonio)ethyl)-1H-indol-5-yl)- N-Methylmethanesulfonamide Succinate Hemi(Ethanol Solvate)
Source: Preprints.org preprint supplement (doi:10.20944/preprints202312.1010.v1), 2023-12-13
Supplement: Supplementary file 1 [file supplementary]

Supporting Information for  
**1-(3-(2-(Dimethylammonio)ethyl)-1H-indol-5-yl)-N-methylmethanesulfonamide succinate hemi(ethanol solvate)**

Petr A. Buikin, Anna V. Vologzhanina, and Alexander A. Korlyukov

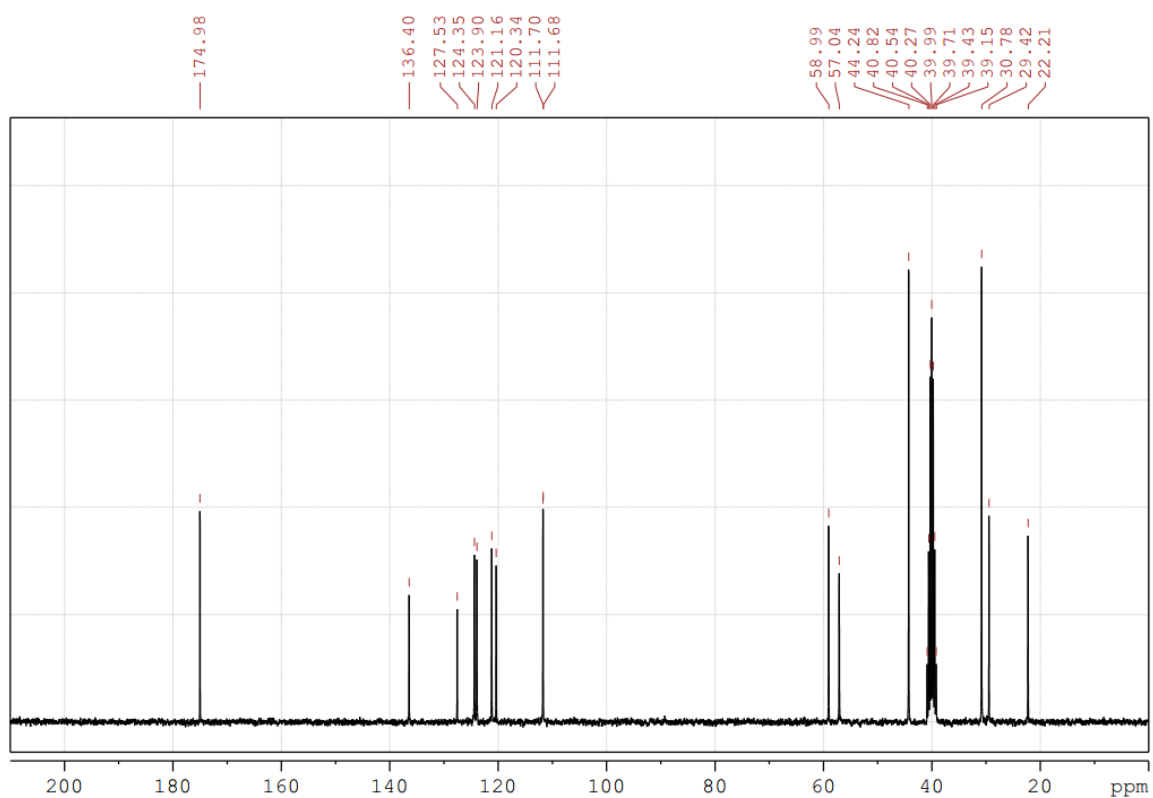

**Figure S1.** <sup>13</sup>C NMR spectrum of sumatriptan succinate hemi(ethanol solvate) in DMSO solution.

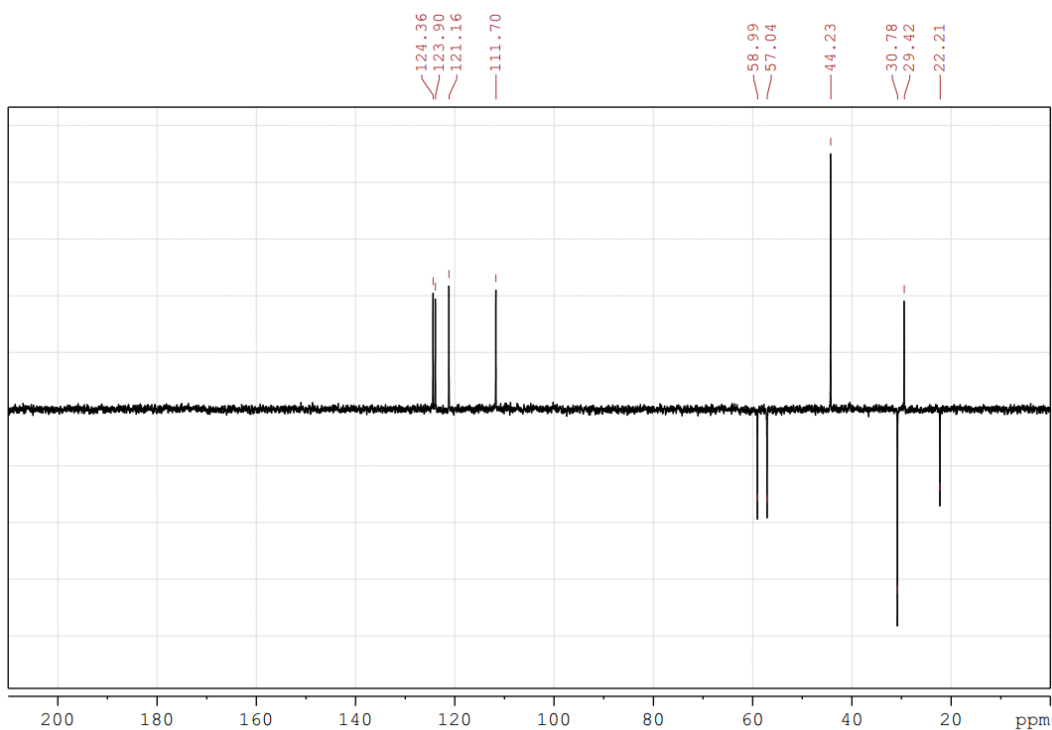

**Figure S2.** DEPT <sup>13</sup>C NMR spectrum of sumatriptan succinate hemi(ethanol solvate) in DMSO solution.

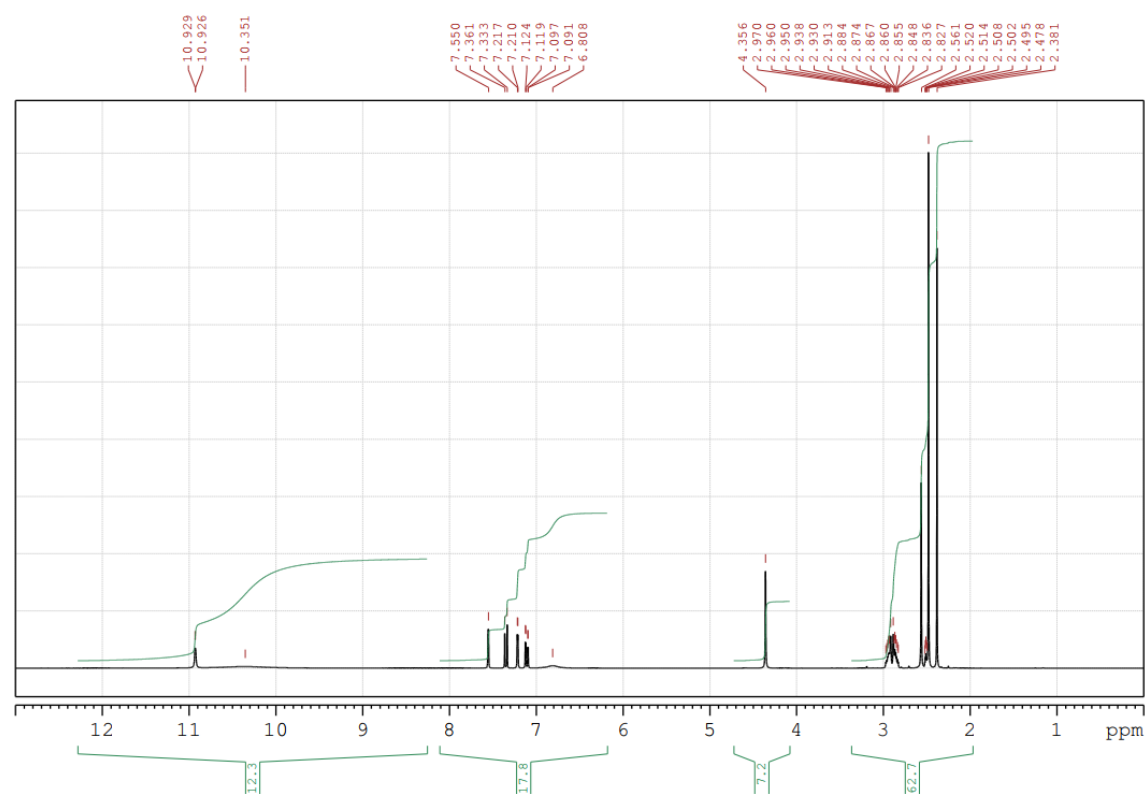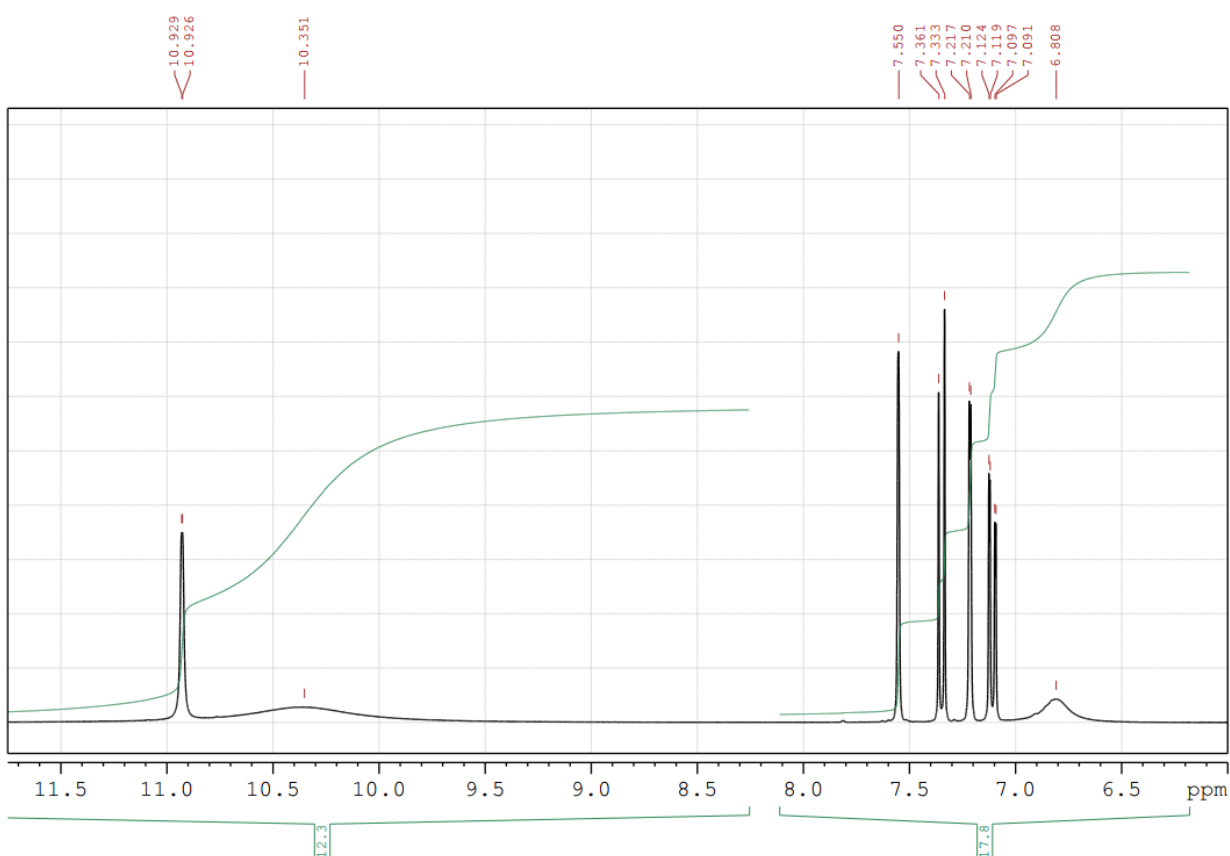

**Figure S3.**  $^1\text{H}$  NMR spectrum of sumatriptan succinate hemi(ethanol solvate) in DMSO solution.

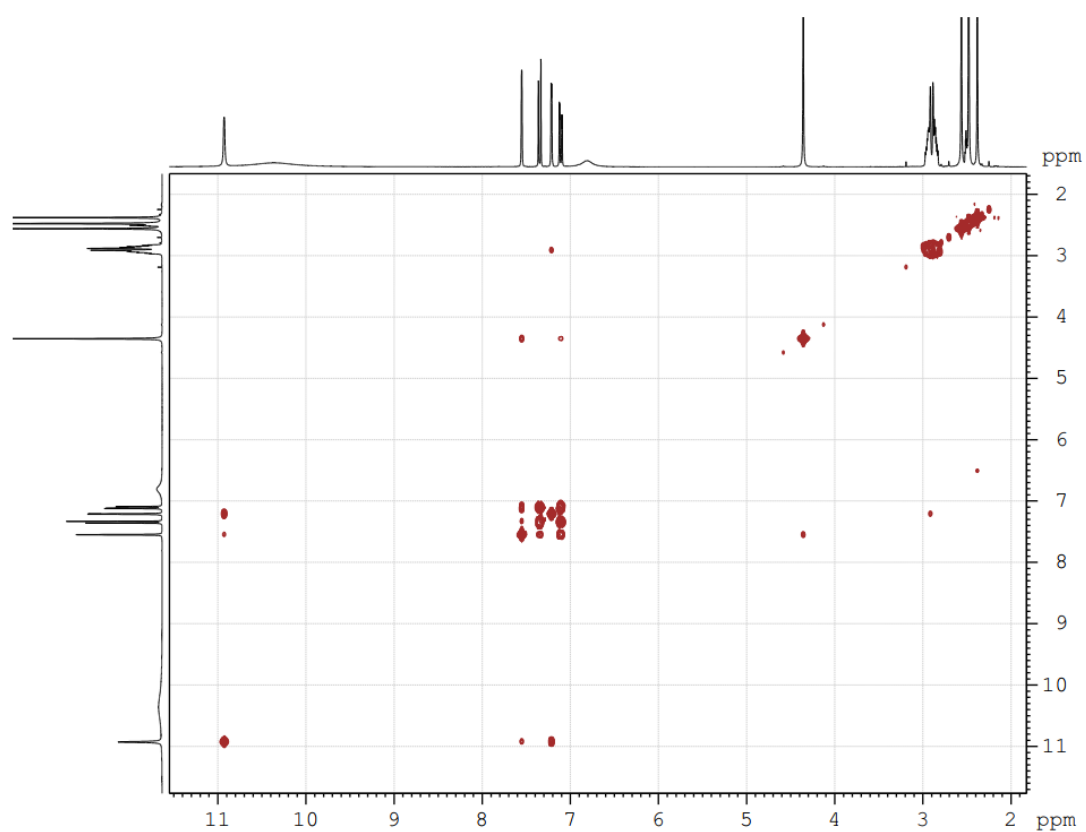

**Figure S4.** 2D NMR  $^{13}\text{C}$ - $^1\text{H}$  COSY spectrum of sumatriptan succinate hemi(ethanol solvate) in DMSO solution.

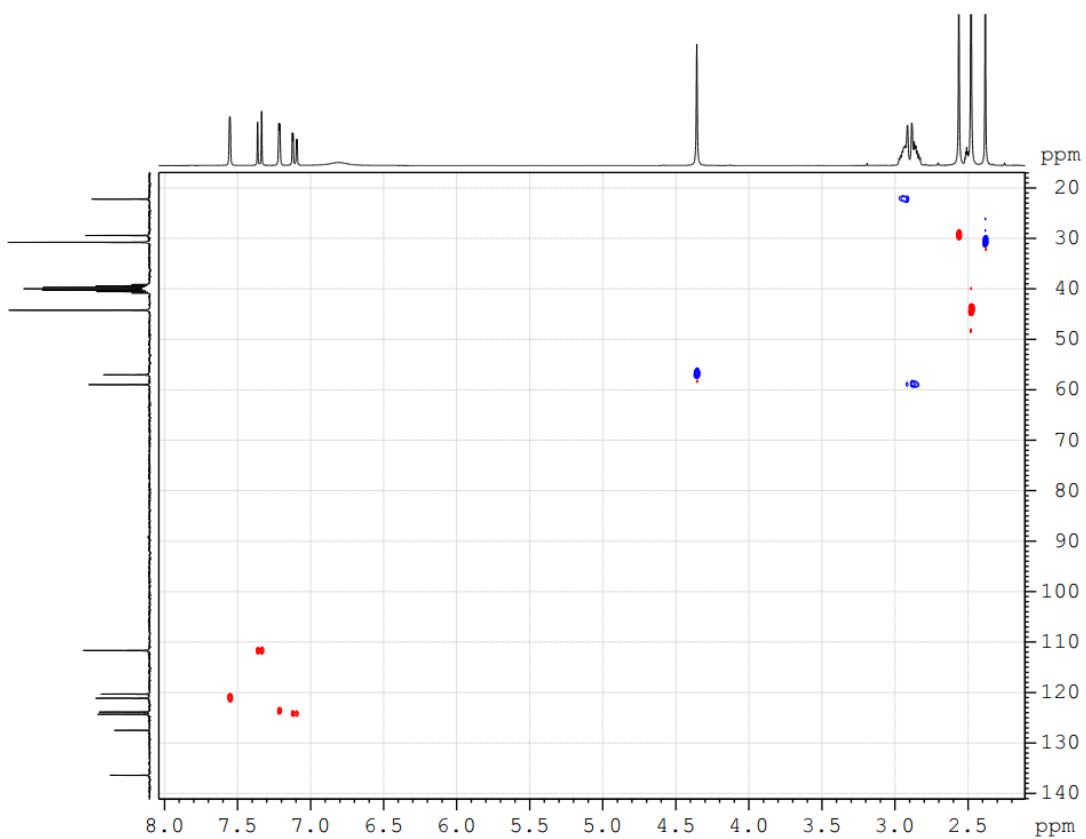

**Figure S5.** 2D NMR  $^{13}\text{C}$ - $^1\text{H}$  HSQC spectrum of sumatriptan succinate hemi(ethanol solvate) in DMSO solution.

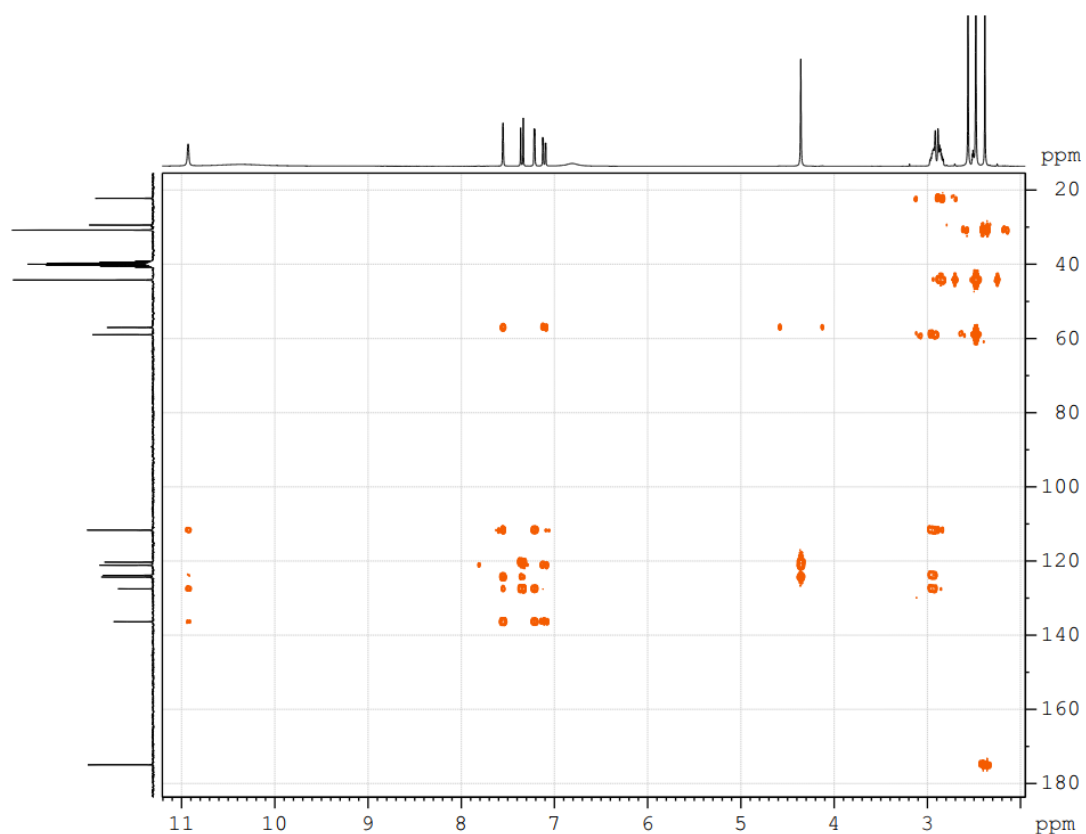

**Figure S6.** 2D NMR  $^{13}\text{C}$ - $^1\text{H}$  HMBC spectrum of sumatriptan succinate hemi(ethanol solvate) in DMSO solution.

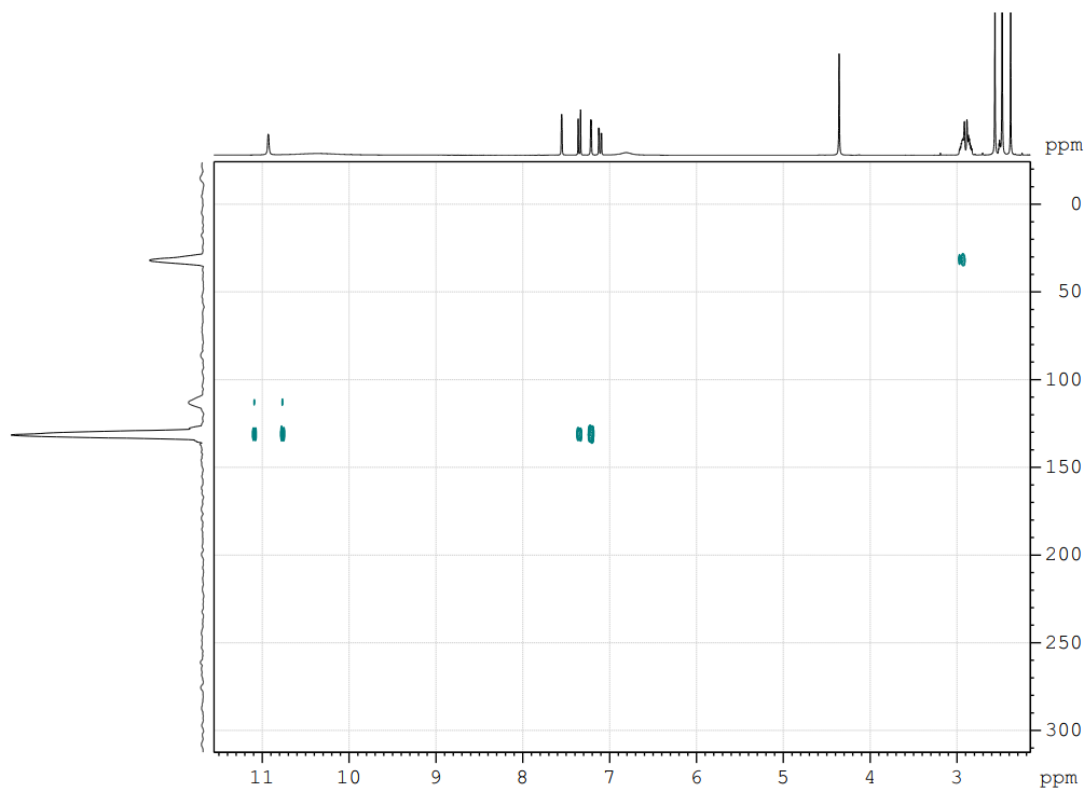

**Figure S7.** 2D  $^1\text{H}$ - $^{15}\text{N}$  HMBC spectrum of sumatriptan succinate hemi(ethanol solvate) in DMSO solution.

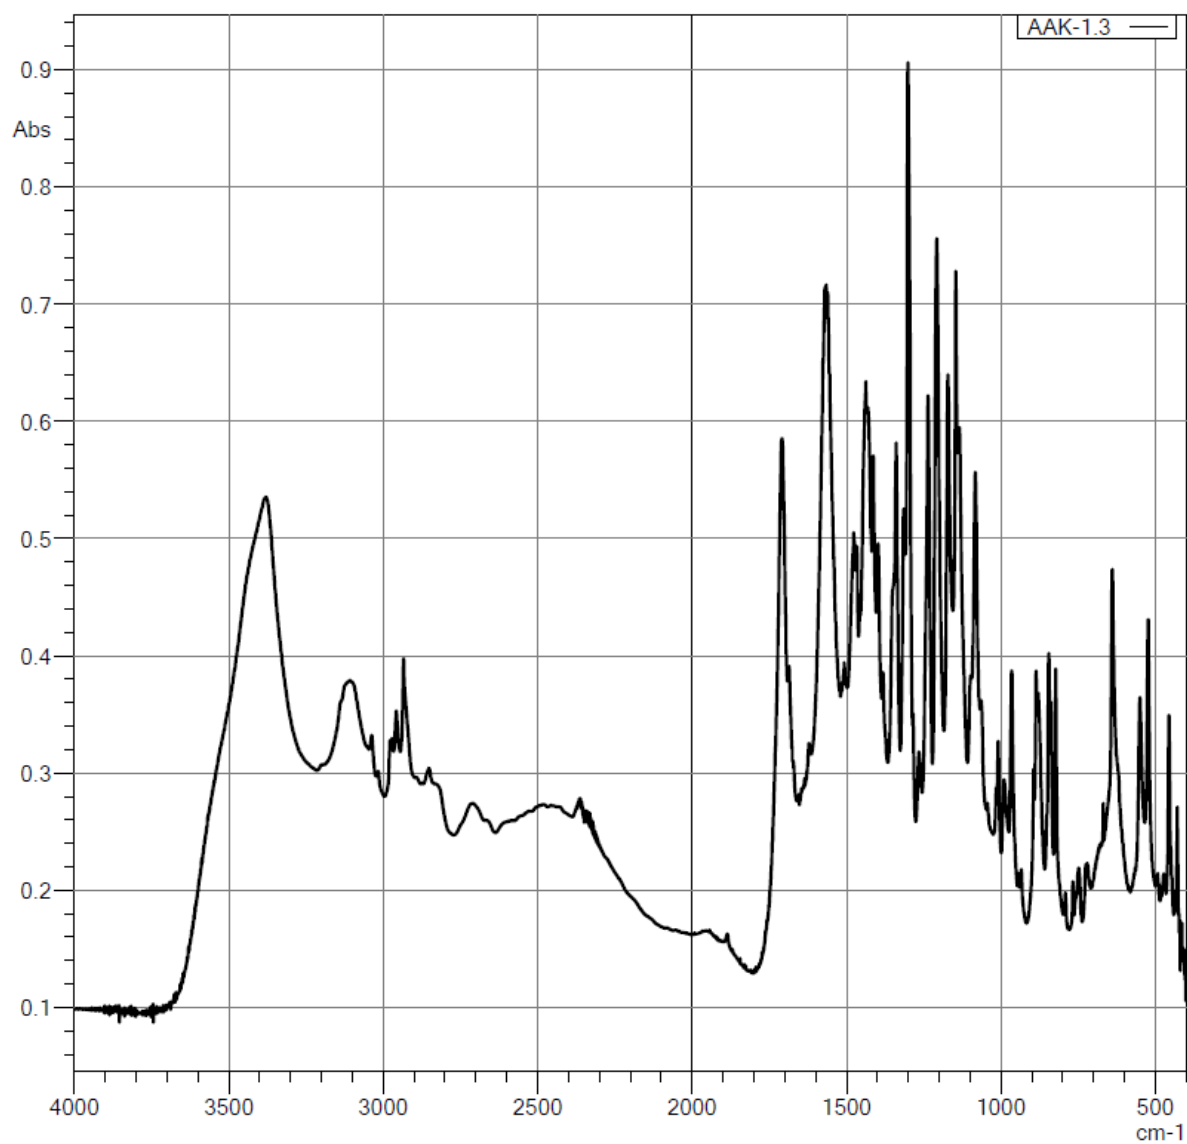

**Figure S8.** FTIR spectrum (in KBr pellets) of sumatriptan succinate hemi(ethanol solvate).
