# Supplementary material for: 1-(3-(2-(Dimethylammonio)ethyl)-1H-indol-5-yl)- N-Methylmethanesulfonamide Succinate Hemi(Ethanol Solvate)
Source: Preprints.org preprint supplement (doi:10.20944/preprints202312.1010.v1), 2023-12-13
Supplement: Supplementary file 3 [file supplementary]

Archive with 4 entries (4 files):
- molbank-2737826-supplementary/a.cif
- molbank-2737826-supplementary/a_cifreport.pdf
- molbank-2737826-supplementary/molbank-2737826-supplementary.pdf
- molbank-2737826-supplementary/SumSucc.mol
