# Supplementary material for: 1-(3-(2-(Dimethylammonio)ethyl)-1H-indol-5-yl)- N-Methylmethanesulfonamide Succinate Hemi(Ethanol Solvate)
Source: Preprints.org preprint supplement (doi:10.20944/preprints202312.1010.v1), 2023-12-13
Supplement: Supplementary file 3 [file supplementary › molbank-2737826-supplementary/a.cif]

data_a
_audit_creation_date               2023-11-22
_audit_creation_method
;
Olex2 1.5
(compiled 2023.08.24 svn.re1ec1418 for OlexSys, GUI svn.r6817)
;
_shelx_SHELXL_version_number       '2018/3'
_audit_contact_author_address      ?
_audit_contact_author_email        ?
_audit_contact_author_name         ''
_audit_contact_author_phone        ?
_publ_contact_author_id_orcid      ?
_publ_section_references
;
Dolomanov, O.V., Bourhis, L.J., Gildea, R.J, Howard, J.A.K. & Puschmann, H.
 (2009), J. Appl. Cryst. 42, 339-341.

Sheldrick, G.M. (2015). Acta Cryst. C71, 3-8.
;
_chemical_name_common              ?
_chemical_name_systematic          ?
_chemical_formula_moiety           '2(C14 H22 N3 O2 S), 2(C4 H5 O4), C2 H6 O'
_chemical_formula_sum              'C38 H60 N6 O13 S2'
_chemical_formula_weight           873.04
_chemical_absolute_configuration   ad
_chemical_melting_point            ?
loop_
  _atom_type_symbol
  _atom_type_description
  _atom_type_scat_dispersion_real
  _atom_type_scat_dispersion_imag
  _atom_type_scat_source
 'C' 'C' 0.0033 0.0016 'International Tables Vol C Tables 4.2.6.8 and 6.1.1.4'
 'H' 'H' 0.0000 0.0000 'International Tables Vol C Tables 4.2.6.8 and 6.1.1.4'
 'N' 'N' 0.0061 0.0033 'International Tables Vol C Tables 4.2.6.8 and 6.1.1.4'
 'O' 'O' 0.0106 0.0060 'International Tables Vol C Tables 4.2.6.8 and 6.1.1.4'
 'S' 'S' 0.1246 0.1234 'International Tables Vol C Tables 4.2.6.8 and 6.1.1.4'

_shelx_space_group_comment
;
The symmetry employed for this shelxl refinement is uniquely defined
by the following loop, which should always be used as a source of
symmetry information in preference to the above space-group names.
They are only intended as comments.
;
_space_group_crystal_system        'monoclinic'
_space_group_IT_number             7
_space_group_name_H-M_alt          'P 1 c 1'
_space_group_name_Hall             'P -2yc'
loop_
  _space_group_symop_operation_xyz
 'x, y, z'
 'x, -y, z+1/2'

_cell_length_a                     9.834(9)
_cell_length_b                     12.609(10)
_cell_length_c                     16.946(16)
_cell_angle_alpha                  90
_cell_angle_beta                   90.94(3)
_cell_angle_gamma                  90
_cell_volume                       2101(3)
_cell_formula_units_Z              2
_cell_measurement_reflns_used      9907
_cell_measurement_temperature      100
_cell_measurement_theta_max        30.578
_cell_measurement_theta_min        2.615
_shelx_estimated_absorpt_T_max     0.960
_shelx_estimated_absorpt_T_min     0.927
_exptl_absorpt_coefficient_mu      0.198
_exptl_absorpt_correction_T_max    0.7461
_exptl_absorpt_correction_T_min    0.4600
_exptl_absorpt_correction_type     multi-scan
_exptl_absorpt_process_details
;
SADABS-2016/2 (Bruker,2016) was used for absorption correction.
wR2(int) was 0.1661 before and 0.0737 after correction.
The Ratio of minimum to maximum transmission is 0.6165.
The \l/2 correction factor is Not present.
;
_exptl_absorpt_special_details     ?
_exptl_crystal_colour              colourless
_exptl_crystal_colour_primary      colourless
_exptl_crystal_density_diffrn      1.380
_exptl_crystal_density_meas        ?
_exptl_crystal_density_method      ?
_exptl_crystal_description         prism
_exptl_crystal_F_000               932
_exptl_crystal_size_max            0.39
_exptl_crystal_size_mid            0.34
_exptl_crystal_size_min            0.21
_exptl_transmission_factor_max     ?
_exptl_transmission_factor_min     ?
_diffrn_reflns_av_R_equivalents    0.0602
_diffrn_reflns_av_unetI/netI       0.0763
_diffrn_reflns_Laue_measured_fraction_full  0.982
_diffrn_reflns_Laue_measured_fraction_max  0.967
_diffrn_reflns_limit_h_max         13
_diffrn_reflns_limit_h_min         -14
_diffrn_reflns_limit_k_max         17
_diffrn_reflns_limit_k_min         -18
_diffrn_reflns_limit_l_max         24
_diffrn_reflns_limit_l_min         -21
_diffrn_reflns_number              22256
_diffrn_reflns_point_group_measured_fraction_full  0.814
_diffrn_reflns_point_group_measured_fraction_max  0.783
_diffrn_reflns_theta_full          25.242
_diffrn_reflns_theta_max           30.893
_diffrn_reflns_theta_min           2.013
_diffrn_ambient_temperature        100.00
_diffrn_detector_area_resol_mean   8
_diffrn_measured_fraction_theta_full  0.982
_diffrn_measured_fraction_theta_max  0.967
_diffrn_measurement_device_type    'Bruker D8 QUEST'
_diffrn_measurement_method         '\f and \w scans'
_diffrn_radiation_type             MoK\a
_diffrn_radiation_wavelength       0.71073
_diffrn_source                     ?
_reflns_Friedel_coverage           0.617
_reflns_Friedel_fraction_full      0.646
_reflns_Friedel_fraction_max       0.599
_reflns_number_gt                  9088
_reflns_number_total               10388
_reflns_special_details
;
 Reflections were merged by SHELXL according to the crystal
 class for the calculation of statistics and refinement.
 
 _reflns_Friedel_fraction is defined as the number of unique
 Friedel pairs measured divided by the number that would be
 possible theoretically, ignoring centric projections and
 systematic absences. Completness statistics refer to single and
 composite reflections containing twin component 1 only.
;
_reflns_threshold_expression       'I > 2\s(I)'
_computing_cell_refinement         'SAINT V8.40A (Bruker, 2019)'
_computing_data_collection         ?
_computing_data_reduction          'SAINT V8.40A (Bruker, 2019)'
_computing_molecular_graphics      'Olex2 1.5 (Dolomanov et al., 2009)'
_computing_publication_material    'Olex2 1.5 (Dolomanov et al., 2009)'
_computing_structure_refinement    'SHELXL 2018/3 (Sheldrick, 2015)'
_computing_structure_solution      'XT  (Sheldrick, 2015)'
_refine_diff_density_max           0.705
_refine_diff_density_min           -0.458
_refine_diff_density_rms           0.068
_refine_ls_abs_structure_details
;
 Refined as an inversion twin.
;
_refine_ls_extinction_coef         .
_refine_ls_extinction_method       none
_refine_ls_goodness_of_fit_ref     1.025
_refine_ls_hydrogen_treatment      mixed
_refine_ls_matrix_type             full
_refine_ls_number_parameters       576
_refine_ls_number_reflns           10388
_refine_ls_number_restraints       11
_refine_ls_R_factor_all            0.0561
_refine_ls_R_factor_gt             0.0467
_refine_ls_restrained_S_all        1.025
_refine_ls_shift/su_max            0.000
_refine_ls_shift/su_mean           0.000
_refine_ls_structure_factor_coef   Fsqd
_refine_ls_weighting_details      
 'w=1/[\s^2^(Fo^2^)+(0.0542P)^2^+0.1832P] where P=(Fo^2^+2Fc^2^)/3'
_refine_ls_weighting_scheme        calc
_refine_ls_wR_factor_gt            0.1134
_refine_ls_wR_factor_ref           0.1188
_refine_special_details
;
 Refined as a 2-component inversion twin.
;
_olex2_refinement_description
;
1. Others
 Fixed Uiso: H1A(0.04) H1B(0.04) H1C(0.04) H2A(0.025) H2B(0.025) H4(0.026)
 H5(0.025) H7(0.028) H10(0.022) H11A(0.028) H11B(0.028) H12A(0.022) H12B(0.022)
 H13A(0.032) H13B(0.032) H13C(0.032) H14A(0.031) H14B(0.031) H14C(0.031)
 H1AB(0.035) H1AC(0.035) H1AD(0.035) H2AB(0.02) H2AC(0.02) H4A(0.021)
 H5A(0.021) H7A(0.025) H10A(0.02) H11C(0.023) H11D(0.023) H12C(0.02) H12D(0.02)
 H13D(0.033) H13E(0.033) H13F(0.033) H14D(0.031) H14E(0.031) H14F(0.031)
 H2BA(0.024) H2BB(0.024) H3BA(0.026) H3BB(0.026) H2CA(0.023) H2CB(0.023)
 H3BC(0.026) H3BD(0.026) H1SA(0.047) H1SB(0.047) H2SA(0.078) H2SB(0.078)
 H2SC(0.078)
 Fixed X: H1A(0.438392) H1B(0.445203) H1C(0.363802) H2A(0.681284)
 H2B(0.760351) H4(0.99924) H5(1.208436) H7(1.246281) H10(0.811503)
 H11A(0.873869) H11B(0.947653) H12A(1.053739) H12B(1.099596) H13A(0.961116)
 H13B(0.81569) H13C(0.836417) H14A(1.045662) H14B(0.990866) H14C(0.893263)
 H1AB(0.528027) H1AC(0.613303) H1AD(0.538879) H2AB(0.29346) H2AC(0.208806) H4A(-
 0.031652) H5A(-0.237964) H7A(-0.259602) H10A(0.172407) H11C(0.110616)
 H11D(0.051787) H12C(-0.069904) H12D(-0.11155) H13D(0.162224) H13E(0.138454)
 H13F(0.013934) H14D(0.002484) H14E(0.090105) H14F(-0.064021) H2BA(0.537341)
 H2BB(0.576042) H3BA(0.633548) H3BB(0.728716) H2CA(0.407704) H2CB(0.438474)
 H3BC(0.361883) H3BD(0.263315) H1SA(0.391443) H1SB(0.326052) H2SA(0.599839)
 H2SB(0.496299) H2SC(0.547418)
 Fixed Y: H1A(0.429525) H1B(0.384427) H1C(0.320536) H2A(0.446014)
 H2B(0.335671) H4(0.33363) H5(0.42019) H7(0.792896) H10(0.602999)
 H11A(0.805154) H11B(0.803617) H12A(0.924963) H12B(0.93404) H13A(1.033314)
 H13B(1.078162) H13C(0.953573) H14A(1.133882) H14B(1.101032) H14C(1.162543)
 H1AB(-0.061761) H1AC(-0.124624) H1AD(-0.015831) H2AB(-0.015081) H2AC(-
 0.123466) H4A(-0.118994) H5A(-0.027459) H7A(0.3466) H10A(0.149847)
 H11C(0.358006) H11D(0.353878) H12C(0.480221) H12D(0.482467) H13D(0.632468)
 H13E(0.508412) H13F(0.589472) H14D(0.652165) H14E(0.715775) H14F(0.683909)
 H2BA(0.505999) H2BB(0.503169) H3BA(0.686371) H3BB(0.613817) H2CA(-0.051362)
 H2CB(-0.062371) H3BC(0.130016) H3BD(0.06039) H1SA(0.191163) H1SB(0.298168)
 H2SA(0.238518) H2SB(0.253457) H2SC(0.354551)
 Fixed Z: H1A(0.296346) H1B(0.384596) H1C(0.31728) H2A(0.430295) H2B(0.439714)
 H4(0.451919) H5(0.461435) H7(0.391235) H10(0.37707) H11A(0.377292)
 H11B(0.293784) H12A(0.423368) H12B(0.333408) H13A(0.238953) H13B(0.263713)
 H13C(0.250496) H14A(0.357755) H14B(0.442729) H14C(0.381663) H1AB(0.626201)
 H1AC(0.692453) H1AD(0.714115) H2AB(0.576882) H2AC(0.573616) H4A(0.564256)
 H5A(0.557773) H7A(0.621436) H10A(0.624778) H11C(0.620128) H11D(0.707589)
 H12C(0.58506) H12D(0.675958) H13D(0.747583) H13E(0.761768) H13F(0.768318)
 H14D(0.563661) H14E(0.628475) H14F(0.645917) H2BA(0.540174) H2BB(0.632063)
 H3BA(0.625926) H3BB(0.572689) H2CA(0.361169) H2CB(0.453817) H3BC(0.376853)
 H3BD(0.430441) H1SA(0.697078) H1SB(0.730022) H2SA(0.741946) H2SB(0.812963)
 H2SC(0.764664)
;
_atom_sites_solution_hydrogens     mixed
_atom_sites_solution_primary       ?
_atom_sites_solution_secondary     ?
loop_
  _atom_site_label
  _atom_site_type_symbol
  _atom_site_fract_x
  _atom_site_fract_y
  _atom_site_fract_z
  _atom_site_U_iso_or_equiv
  _atom_site_adp_type
  _atom_site_occupancy
  _atom_site_site_symmetry_order
  _atom_site_calc_flag
  _atom_site_refinement_flags_posn
  _atom_site_refinement_flags_adp
  _atom_site_refinement_flags_occupancy
  _atom_site_disorder_assembly
  _atom_site_disorder_group
 S1 S 0.70925(7) 0.36789(5) 0.30861(4) 0.01703(14) Uani 1 1 d . . . . .
 O1 O 0.8071(3) 0.29395(17) 0.28098(14) 0.0235(5) Uani 1 1 d . . . . .
 O2 O 0.6900(3) 0.46551(17) 0.26659(14) 0.0231(5) Uani 1 1 d . . . . .
 N1 N 0.5665(3) 0.30678(19) 0.31005(17) 0.0204(5) Uani 1 1 d D . . . .
 H1 H 0.578(5) 0.241(2) 0.330(3) 0.052(15) Uiso 1 1 d D . . . .
 N2 N 1.2397(3) 0.6343(2) 0.42240(18) 0.0228(6) Uani 1 1 d D . . . .
 H2 H 1.324(3) 0.628(3) 0.442(2) 0.033(11) Uiso 1 1 d D . . . .
 N3 N 0.9182(3) 1.00650(18) 0.35408(16) 0.0171(5) Uani 1 1 d D . . . .
 H3 H 0.843(3) 0.989(3) 0.380(2) 0.018(9) Uiso 1 1 d D . . . .
 C1 C 0.4434(4) 0.3651(3) 0.3286(2) 0.0270(7) Uani 1 1 d . . . . .
 H1A H 0.438392 0.429525 0.296346 0.040 Uiso 1 1 calc R U . . .
 H1B H 0.445203 0.384427 0.384596 0.040 Uiso 1 1 calc R U . . .
 H1C H 0.363802 0.320536 0.317280 0.040 Uiso 1 1 calc R U . . .
 C2 C 0.7539(3) 0.4014(2) 0.40790(19) 0.0208(6) Uani 1 1 d . . . . .
 H2A H 0.681284 0.446014 0.430295 0.025 Uiso 1 1 calc R U . . .
 H2B H 0.760351 0.335671 0.439714 0.025 Uiso 1 1 calc R U . . .
 C3 C 0.8864(3) 0.4597(2) 0.41368(18) 0.0189(6) Uani 1 1 d . . . . .
 C4 C 1.0048(4) 0.4066(2) 0.43853(19) 0.0214(6) Uani 1 1 d . . . . .
 H4 H 0.999240 0.333630 0.451919 0.026 Uiso 1 1 calc R U . . .
 C5 C 1.1291(3) 0.4569(2) 0.44416(19) 0.0210(6) Uani 1 1 d . . . . .
 H5 H 1.208436 0.420190 0.461435 0.025 Uiso 1 1 calc R U . . .
 C6 C 1.1336(3) 0.5642(2) 0.42344(19) 0.0191(6) Uani 1 1 d . . . . .
 C7 C 1.1920(3) 0.7311(2) 0.3968(2) 0.0232(7) Uani 1 1 d . . . . .
 H7 H 1.246281 0.792896 0.391235 0.028 Uiso 1 1 calc R U . . .
 C8 C 1.0559(3) 0.7260(2) 0.38054(19) 0.0201(6) Uani 1 1 d . . . . .
 C9 C 1.0162(3) 0.6189(2) 0.39768(18) 0.0183(6) Uani 1 1 d . . . . .
 C10 C 0.8916(3) 0.5664(2) 0.39347(18) 0.0184(6) Uani 1 1 d . . . . .
 H10 H 0.811503 0.602999 0.377070 0.022 Uiso 1 1 calc R U . . .
 C11 C 0.9629(3) 0.8120(2) 0.3513(2) 0.0234(7) Uani 1 1 d . . . . .
 H11A H 0.873869 0.805154 0.377292 0.028 Uiso 1 1 calc R U . . .
 H11B H 0.947653 0.803617 0.293784 0.028 Uiso 1 1 calc R U . . .
 C12 C 1.0209(3) 0.9216(2) 0.36789(18) 0.0181(6) Uani 1 1 d . . . . .
 H12A H 1.053739 0.924963 0.423368 0.022 Uiso 1 1 calc R U . . .
 H12B H 1.099596 0.934040 0.333408 0.022 Uiso 1 1 calc R U . . .
 C13 C 0.8796(3) 1.0189(2) 0.26966(19) 0.0213(6) Uani 1 1 d . . . . .
 H13A H 0.961116 1.033314 0.238953 0.032 Uiso 1 1 calc R U . . .
 H13B H 0.815690 1.078162 0.263713 0.032 Uiso 1 1 calc R U . . .
 H13C H 0.836417 0.953573 0.250496 0.032 Uiso 1 1 calc R U . . .
 C14 C 0.9661(3) 1.1098(2) 0.3869(2) 0.0203(6) Uani 1 1 d . . . . .
 H14A H 1.045662 1.133882 0.357755 0.031 Uiso 1 1 calc R U . . .
 H14B H 0.990866 1.101032 0.442729 0.031 Uiso 1 1 calc R U . . .
 H14C H 0.893263 1.162543 0.381663 0.031 Uiso 1 1 calc R U . . .
 S1A S 0.26633(7) -0.08167(5) 0.70195(4) 0.01579(14) Uani 1 1 d . . . . .
 O1A O 0.1703(2) -0.15631(16) 0.73244(14) 0.0209(4) Uani 1 1 d . . . . .
 O2A O 0.2813(2) 0.01886(16) 0.74073(13) 0.0207(4) Uani 1 1 d . . . . .
 N1A N 0.4111(3) -0.13943(19) 0.70322(17) 0.0197(5) Uani 1 1 d D . . . .
 H1AA H 0.410(4) -0.203(2) 0.683(2) 0.023(10) Uiso 1 1 d D . . . .
 N2A N -0.2585(3) 0.1870(2) 0.59286(17) 0.0208(5) Uani 1 1 d D . . . .
 H2AA H -0.346(3) 0.171(3) 0.586(2) 0.027(11) Uiso 1 1 d D . . . .
 N3A N 0.0672(3) 0.55943(18) 0.65520(16) 0.0161(5) Uani 1 1 d D . . . .
 H3A H 0.139(4) 0.539(4) 0.629(3) 0.057(16) Uiso 1 1 d D . . . .
 C1A C 0.5328(3) -0.0806(2) 0.6823(2) 0.0236(6) Uani 1 1 d . . . . .
 H1AB H 0.528027 -0.061761 0.626201 0.035 Uiso 1 1 calc R U . . .
 H1AC H 0.613303 -0.124624 0.692453 0.035 Uiso 1 1 calc R U . . .
 H1AD H 0.538879 -0.015831 0.714115 0.035 Uiso 1 1 calc R U . . .
 C2A C 0.2197(3) -0.0554(2) 0.60220(17) 0.0171(5) Uani 1 1 d . . . . .
 H2AB H 0.293460 -0.015081 0.576882 0.020 Uiso 1 1 calc R U . . .
 H2AC H 0.208806 -0.123466 0.573616 0.020 Uiso 1 1 calc R U . . .
 C3A C 0.0893(3) 0.0067(2) 0.59537(18) 0.0165(5) Uani 1 1 d . . . . .
 C4A C -0.0333(3) -0.0452(2) 0.57550(17) 0.0176(6) Uani 1 1 d . . . . .
 H4A H -0.031652 -0.118994 0.564256 0.021 Uiso 1 1 calc R U . . .
 C5A C -0.1559(3) 0.0080(2) 0.57189(18) 0.0174(6) Uani 1 1 d . . . . .
 H5A H -0.237964 -0.027459 0.557773 0.021 Uiso 1 1 calc R U . . .
 C6A C -0.1544(3) 0.1158(2) 0.58980(18) 0.0176(6) Uani 1 1 d . . . . .
 C7A C -0.2070(3) 0.2841(2) 0.61500(19) 0.0205(6) Uani 1 1 d . . . . .
 H7A H -0.259602 0.346600 0.621436 0.025 Uiso 1 1 calc R U . . .
 C8A C -0.0700(3) 0.2778(2) 0.62635(18) 0.0173(5) Uani 1 1 d . . . . .
 C9A C -0.0336(3) 0.1702(2) 0.61028(18) 0.0165(5) Uani 1 1 d . . . . .
 C10A C 0.0897(3) 0.1144(2) 0.61216(18) 0.0170(5) Uani 1 1 d . . . . .
 H10A H 0.172407 0.149847 0.624778 0.020 Uiso 1 1 calc R U . . .
 C11A C 0.0266(3) 0.3637(2) 0.6513(2) 0.0191(6) Uani 1 1 d . . . . .
 H11C H 0.110616 0.358006 0.620128 0.023 Uiso 1 1 calc R U . . .
 H11D H 0.051787 0.353878 0.707589 0.023 Uiso 1 1 calc R U . . .
 C12A C -0.0343(3) 0.4736(2) 0.63982(18) 0.0165(5) Uani 1 1 d . . . . .
 H12C H -0.069904 0.480221 0.585060 0.020 Uiso 1 1 calc R U . . .
 H12D H -0.111550 0.482467 0.675958 0.020 Uiso 1 1 calc R U . . .
 C13A C 0.0981(4) 0.5736(2) 0.74044(19) 0.0219(6) Uani 1 1 d . . . . .
 H13D H 0.162224 0.632468 0.747583 0.033 Uiso 1 1 calc R U . . .
 H13E H 0.138454 0.508412 0.761768 0.033 Uiso 1 1 calc R U . . .
 H13F H 0.013934 0.589472 0.768318 0.033 Uiso 1 1 calc R U . . .
 C14A C 0.0199(3) 0.6615(2) 0.6203(2) 0.0209(6) Uani 1 1 d . . . . .
 H14D H 0.002484 0.652165 0.563661 0.031 Uiso 1 1 calc R U . . .
 H14E H 0.090105 0.715775 0.628475 0.031 Uiso 1 1 calc R U . . .
 H14F H -0.064021 0.683909 0.645917 0.031 Uiso 1 1 calc R U . . .
 O1B O 0.3131(2) 0.50156(16) 0.61310(15) 0.0239(5) Uani 1 1 d . . . . .
 O2B O 0.3633(3) 0.67274(16) 0.61977(16) 0.0255(5) Uani 1 1 d . . . . .
 O3B O 0.5195(3) 0.68572(19) 0.45676(15) 0.0296(6) Uani 1 1 d . . . . .
 O4B O 0.6766(3) 0.79467(17) 0.50661(14) 0.0247(5) Uani 1 1 d D . . . .
 H4B H 0.665(5) 0.836(3) 0.468(2) 0.044(13) Uiso 1 1 d D . . . .
 C1B C 0.3954(3) 0.5792(2) 0.60882(18) 0.0176(5) Uani 1 1 d . . . . .
 C2B C 0.5393(3) 0.5487(2) 0.5892(2) 0.0201(6) Uani 1 1 d . . . . .
 H2BA H 0.537341 0.505999 0.540174 0.024 Uiso 1 1 calc R U . . .
 H2BB H 0.576042 0.503169 0.632063 0.024 Uiso 1 1 calc R U . . .
 C3B C 0.6351(3) 0.6414(2) 0.5780(2) 0.0217(6) Uani 1 1 d . . . . .
 H3BA H 0.633548 0.686371 0.625926 0.026 Uiso 1 1 calc R U . . .
 H3BB H 0.728716 0.613817 0.572689 0.026 Uiso 1 1 calc R U . . .
 C4B C 0.6013(3) 0.7086(2) 0.50788(19) 0.0194(6) Uani 1 1 d . . . . .
 O1C O 0.6250(2) 0.10468(17) 0.37694(15) 0.0235(5) Uani 1 1 d . . . . .
 O2C O 0.6767(2) -0.06277(16) 0.40189(14) 0.0211(5) Uani 1 1 d . . . . .
 O3C O 0.4825(2) 0.10326(16) 0.54418(14) 0.0217(4) Uani 1 1 d . . . . .
 O4C O 0.3565(3) 0.23762(19) 0.50088(16) 0.0294(6) Uani 1 1 d D . . . .
 H4C H 0.390(4) 0.260(3) 0.5453(17) 0.030(11) Uiso 1 1 d D . . . .
 C1C C 0.5916(3) 0.0133(2) 0.39484(18) 0.0189(6) Uani 1 1 d . . . . .
 C2C C 0.4444(3) -0.0137(2) 0.40815(19) 0.0192(6) Uani 1 1 d . . . . .
 H2CA H 0.407704 -0.051362 0.361169 0.023 Uiso 1 1 calc R U . . .
 H2CB H 0.438474 -0.062371 0.453817 0.023 Uiso 1 1 calc R U . . .
 C3BC C 0.3589(3) 0.0824(2) 0.4233(2) 0.0214(6) Uani 1 1 d . . . . .
 H3BC H 0.361883 0.130016 0.376853 0.026 Uiso 1 1 calc R U . . .
 H3BD H 0.263315 0.060390 0.430441 0.026 Uiso 1 1 calc R U . . .
 C4C C 0.4071(3) 0.1414(2) 0.49472(19) 0.0193(6) Uani 1 1 d . . . . .
 O1S O 0.4299(3) 0.31784(17) 0.63175(15) 0.0291(5) Uani 1 1 d D . . . .
 H1S H 0.397(5) 0.380(2) 0.636(3) 0.045(13) Uiso 1 1 d D . . . .
 C1S C 0.4084(5) 0.2677(3) 0.7060(2) 0.0390(9) Uani 1 1 d . . . . .
 H1SA H 0.391443 0.191163 0.697078 0.047 Uiso 1 1 calc R U . . .
 H1SB H 0.326052 0.298168 0.730022 0.047 Uiso 1 1 calc R U . . .
 C2S C 0.5222(5) 0.2795(5) 0.7608(3) 0.0521(12) Uani 1 1 d . . . . .
 H2SA H 0.599839 0.238518 0.741946 0.078 Uiso 1 1 calc R U . . .
 H2SB H 0.496299 0.253457 0.812963 0.078 Uiso 1 1 calc R U . . .
 H2SC H 0.547418 0.354551 0.764664 0.078 Uiso 1 1 calc R U . . .

loop_
  _atom_site_aniso_label
  _atom_site_aniso_U_11
  _atom_site_aniso_U_22
  _atom_site_aniso_U_33
  _atom_site_aniso_U_23
  _atom_site_aniso_U_13
  _atom_site_aniso_U_12
 S1 0.0152(3) 0.0161(3) 0.0197(3) 0.0003(2) -0.0031(3) -0.0022(2)
 O1 0.0213(13) 0.0227(10) 0.0264(12) -0.0036(8) -0.0004(9) 0.0004(8)
 O2 0.0236(13) 0.0196(10) 0.0258(12) 0.0046(8) -0.0057(9) -0.0036(9)
 N1 0.0154(13) 0.0163(10) 0.0294(15) 0.0020(10) -0.0044(10) -0.0042(9)
 N2 0.0138(14) 0.0222(12) 0.0322(15) -0.0024(10) -0.0078(11) 0.0003(9)
 N3 0.0147(13) 0.0169(10) 0.0197(13) -0.0006(9) -0.0020(9) 0.0002(9)
 C1 0.0165(17) 0.0248(15) 0.040(2) 0.0024(13) -0.0002(14) 0.0026(11)
 C2 0.0192(16) 0.0237(14) 0.0195(15) -0.0001(11) -0.0012(11) -0.0052(11)
 C3 0.0175(15) 0.0223(13) 0.0167(14) -0.0027(10) -0.0015(11) -0.0047(11)
 C4 0.0260(18) 0.0193(13) 0.0188(15) -0.0002(10) -0.0047(12) -0.0034(11)
 C5 0.0212(17) 0.0207(13) 0.0209(15) -0.0007(11) -0.0069(12) 0.0008(11)
 C6 0.0182(16) 0.0210(13) 0.0179(15) -0.0009(11) -0.0050(11) -0.0011(11)
 C7 0.0156(16) 0.0192(13) 0.0346(18) -0.0037(12) -0.0037(13) -0.0016(11)
 C8 0.0154(15) 0.0194(13) 0.0253(16) -0.0023(11) -0.0040(12) 0.0017(11)
 C9 0.0157(15) 0.0198(13) 0.0195(14) -0.0045(10) -0.0034(11) 0.0009(10)
 C10 0.0154(15) 0.0203(13) 0.0194(15) -0.0039(10) -0.0045(11) 0.0011(10)
 C11 0.0158(15) 0.0190(13) 0.0350(19) -0.0037(12) -0.0059(13) 0.0004(11)
 C12 0.0144(15) 0.0188(12) 0.0210(15) 0.0002(10) -0.0044(11) -0.0006(10)
 C13 0.0187(16) 0.0269(14) 0.0183(15) 0.0031(11) -0.0033(11) 0.0007(11)
 C14 0.0178(16) 0.0180(12) 0.0252(16) 0.0006(11) -0.0016(12) -0.0010(11)
 S1A 0.0144(3) 0.0142(3) 0.0186(3) -0.0005(2) -0.0029(2) 0.0013(2)
 O1A 0.0179(12) 0.0200(9) 0.0246(12) 0.0020(8) 0.0013(9) -0.0010(8)
 O2A 0.0226(12) 0.0157(9) 0.0236(11) -0.0038(8) -0.0057(9) 0.0025(8)
 N1A 0.0121(12) 0.0165(11) 0.0305(15) -0.0011(10) -0.0037(10) 0.0023(9)
 N2A 0.0135(13) 0.0192(11) 0.0296(14) 0.0010(10) -0.0053(10) -0.0004(9)
 N3A 0.0137(13) 0.0141(10) 0.0206(13) -0.0007(9) -0.0027(9) 0.0000(8)
 C1A 0.0154(16) 0.0251(15) 0.0300(18) 0.0020(12) -0.0041(12) -0.0006(11)
 C2A 0.0144(14) 0.0192(12) 0.0176(14) -0.0016(10) -0.0026(10) 0.0007(10)
 C3A 0.0152(14) 0.0185(12) 0.0156(13) 0.0008(10) -0.0037(10) 0.0001(10)
 C4A 0.0197(15) 0.0159(12) 0.0172(13) -0.0002(10) -0.0033(11) -0.0036(10)
 C5A 0.0140(15) 0.0187(12) 0.0192(14) 0.0006(10) -0.0048(11) -0.0056(10)
 C6A 0.0138(15) 0.0185(12) 0.0204(15) 0.0008(10) -0.0047(11) -0.0008(10)
 C7A 0.0165(16) 0.0169(12) 0.0277(16) -0.0012(11) -0.0052(12) -0.0001(10)
 C8A 0.0151(14) 0.0150(11) 0.0217(14) 0.0010(10) -0.0043(11) -0.0011(10)
 C9A 0.0144(14) 0.0169(12) 0.0181(14) 0.0029(10) -0.0049(10) -0.0011(10)
 C10A 0.0132(14) 0.0160(11) 0.0215(15) 0.0003(10) -0.0048(11) -0.0004(10)
 C11A 0.0158(15) 0.0144(11) 0.0271(16) 0.0000(10) -0.0061(12) -0.0001(10)
 C12A 0.0121(14) 0.0139(11) 0.0235(15) -0.0006(10) -0.0032(10) -0.0024(9)
 C13A 0.0203(16) 0.0246(14) 0.0206(15) -0.0014(11) -0.0050(12) -0.0024(11)
 C14A 0.0205(16) 0.0143(12) 0.0278(16) 0.0012(11) -0.0062(12) -0.0008(10)
 O1B 0.0147(11) 0.0178(9) 0.0392(14) -0.0011(9) 0.0024(9) -0.0024(8)
 O2B 0.0187(12) 0.0177(9) 0.0401(14) -0.0035(9) -0.0017(10) 0.0011(8)
 O3B 0.0226(13) 0.0369(12) 0.0291(13) 0.0071(10) -0.0091(10) -0.0129(10)
 O4B 0.0239(13) 0.0220(10) 0.0279(12) 0.0065(9) -0.0063(9) -0.0073(9)
 C1B 0.0161(15) 0.0172(12) 0.0193(14) -0.0005(10) -0.0027(11) -0.0006(10)
 C2B 0.0144(15) 0.0157(12) 0.0300(16) 0.0036(11) -0.0018(11) 0.0007(10)
 C3B 0.0143(15) 0.0229(13) 0.0277(16) 0.0075(11) -0.0054(12) -0.0033(10)
 C4B 0.0156(15) 0.0201(13) 0.0223(15) 0.0024(10) -0.0025(11) -0.0020(10)
 O1C 0.0192(12) 0.0192(10) 0.0323(13) 0.0056(9) 0.0017(9) -0.0003(8)
 O2C 0.0172(12) 0.0196(10) 0.0265(12) 0.0036(8) 0.0001(9) -0.0004(8)
 O3C 0.0180(12) 0.0216(10) 0.0251(11) 0.0012(8) -0.0061(9) -0.0004(8)
 O4C 0.0319(15) 0.0250(11) 0.0312(14) -0.0021(10) -0.0062(11) 0.0098(10)
 C1C 0.0175(15) 0.0206(12) 0.0183(14) 0.0015(10) -0.0028(11) -0.0038(10)
 C2C 0.0121(14) 0.0218(13) 0.0236(15) 0.0008(11) -0.0026(11) -0.0024(10)
 C3BC 0.0129(15) 0.0266(14) 0.0244(16) 0.0007(11) -0.0049(11) 0.0007(10)
 C4C 0.0127(14) 0.0221(13) 0.0233(15) 0.0044(10) -0.0005(11) -0.0016(10)
 O1S 0.0373(15) 0.0188(10) 0.0310(13) 0.0026(9) -0.0040(11) 0.0014(9)
 C1S 0.037(2) 0.0408(19) 0.039(2) 0.0159(16) -0.0097(17) -0.0091(16)
 C2S 0.043(3) 0.082(3) 0.030(2) 0.010(2) -0.0081(19) -0.024(2)

_geom_special_details
;
 All esds (except the esd in the dihedral angle between two l.s. planes)
 are estimated using the full covariance matrix.  The cell esds are taken
 into account individually in the estimation of esds in distances, angles
 and torsion angles; correlations between esds in cell parameters are only
 used when they are defined by crystal symmetry.  An approximate (isotropic)
 treatment of cell esds is used for estimating esds involving l.s. planes.
;
loop_
  _geom_bond_atom_site_label_1
  _geom_bond_atom_site_label_2
  _geom_bond_distance
  _geom_bond_site_symmetry_2
  _geom_bond_publ_flag
 S1 O1 1.425(3) . ?
 S1 O2 1.433(2) . ?
 S1 N1 1.602(3) . ?
 S1 C2 1.783(4) . ?
 N1 H1 0.90(2) . ?
 N1 C1 1.455(4) . ?
 N2 H2 0.89(2) . ?
 N2 C6 1.368(4) . ?
 N2 C7 1.375(4) . ?
 N3 H3 0.89(2) . ?
 N3 C12 1.487(4) . ?
 N3 C13 1.482(4) . ?
 N3 C14 1.490(4) . ?
 C1 H1A 0.9800 . ?
 C1 H1B 0.9800 . ?
 C1 H1C 0.9800 . ?
 C2 H2A 0.9900 . ?
 C2 H2B 0.9900 . ?
 C2 C3 1.497(4) . ?
 C3 C4 1.402(5) . ?
 C3 C10 1.389(4) . ?
 C4 H4 0.9500 . ?
 C4 C5 1.379(5) . ?
 C5 H5 0.9500 . ?
 C5 C6 1.397(4) . ?
 C6 C9 1.408(4) . ?
 C7 H7 0.9500 . ?
 C7 C8 1.363(5) . ?
 C8 C9 1.437(4) . ?
 C8 C11 1.498(4) . ?
 C9 C10 1.394(4) . ?
 C10 H10 0.9500 . ?
 C11 H11A 0.9900 . ?
 C11 H11B 0.9900 . ?
 C11 C12 1.520(4) . ?
 C12 H12A 0.9900 . ?
 C12 H12B 0.9900 . ?
 C13 H13A 0.9800 . ?
 C13 H13B 0.9800 . ?
 C13 H13C 0.9800 . ?
 C14 H14A 0.9800 . ?
 C14 H14B 0.9800 . ?
 C14 H14C 0.9800 . ?
 S1A O1A 1.435(2) . ?
 S1A O2A 1.434(2) . ?
 S1A N1A 1.599(3) . ?
 S1A C2A 1.775(3) . ?
 N1A H1AA 0.87(2) . ?
 N1A C1A 1.457(4) . ?
 N2A H2AA 0.89(2) . ?
 N2A C6A 1.363(4) . ?
 N2A C7A 1.375(4) . ?
 N3A H3A 0.88(2) . ?
 N3A C12A 1.492(4) . ?
 N3A C13A 1.482(4) . ?
 N3A C14A 1.488(4) . ?
 C1A H1AB 0.9800 . ?
 C1A H1AC 0.9800 . ?
 C1A H1AD 0.9800 . ?
 C2A H2AB 0.9900 . ?
 C2A H2AC 0.9900 . ?
 C2A C3A 1.505(4) . ?
 C3A C4A 1.408(4) . ?
 C3A C10A 1.387(4) . ?
 C4A H4A 0.9500 . ?
 C4A C5A 1.380(4) . ?
 C5A H5A 0.9500 . ?
 C5A C6A 1.393(4) . ?
 C6A C9A 1.409(4) . ?
 C7A H7A 0.9500 . ?
 C7A C8A 1.360(4) . ?
 C8A C9A 1.431(4) . ?
 C8A C11A 1.497(4) . ?
 C9A C10A 1.402(4) . ?
 C10A H10A 0.9500 . ?
 C11A H11C 0.9900 . ?
 C11A H11D 0.9900 . ?
 C11A C12A 1.521(4) . ?
 C12A H12C 0.9900 . ?
 C12A H12D 0.9900 . ?
 C13A H13D 0.9800 . ?
 C13A H13E 0.9800 . ?
 C13A H13F 0.9800 . ?
 C14A H14D 0.9800 . ?
 C14A H14E 0.9800 . ?
 C14A H14F 0.9800 . ?
 O1B C1B 1.273(4) . ?
 O2B C1B 1.236(3) . ?
 O3B C4B 1.208(4) . ?
 O4B H4B 0.84(2) . ?
 O4B C4B 1.314(4) . ?
 C1B C2B 1.509(5) . ?
 C2B H2BA 0.9900 . ?
 C2B H2BB 0.9900 . ?
 C2B C3B 1.515(4) . ?
 C3B H3BA 0.9900 . ?
 C3B H3BB 0.9900 . ?
 C3B C4B 1.493(4) . ?
 O1C C1C 1.237(4) . ?
 O2C C1C 1.278(4) . ?
 O3C C4C 1.210(4) . ?
 O4C H4C 0.86(2) . ?
 O4C C4C 1.317(4) . ?
 C1C C2C 1.507(4) . ?
 C2C H2CA 0.9900 . ?
 C2C H2CB 0.9900 . ?
 C2C C3BC 1.500(4) . ?
 C3BC H3BC 0.9900 . ?
 C3BC H3BD 0.9900 . ?
 C3BC C4C 1.491(5) . ?
 O1S H1S 0.85(2) . ?
 O1S C1S 1.427(5) . ?
 C1S H1SA 0.9900 . ?
 C1S H1SB 0.9900 . ?
 C1S C2S 1.451(5) . ?
 C2S H2SA 0.9800 . ?
 C2S H2SB 0.9800 . ?
 C2S H2SC 0.9800 . ?

loop_
  _geom_angle_atom_site_label_1
  _geom_angle_atom_site_label_2
  _geom_angle_atom_site_label_3
  _geom_angle
  _geom_angle_site_symmetry_1
  _geom_angle_site_symmetry_3
  _geom_angle_publ_flag
 O1 S1 O2 118.90(16) . . ?
 O1 S1 N1 106.68(15) . . ?
 O1 S1 C2 107.93(16) . . ?
 O2 S1 N1 108.18(15) . . ?
 O2 S1 C2 107.10(15) . . ?
 N1 S1 C2 107.58(15) . . ?
 S1 N1 H1 110(3) . . ?
 C1 N1 S1 119.5(2) . . ?
 C1 N1 H1 119(3) . . ?
 C6 N2 H2 130(3) . . ?
 C6 N2 C7 108.8(3) . . ?
 C7 N2 H2 120(3) . . ?
 C12 N3 H3 108(2) . . ?
 C12 N3 C14 111.1(2) . . ?
 C13 N3 H3 107(3) . . ?
 C13 N3 C12 113.0(2) . . ?
 C13 N3 C14 110.0(2) . . ?
 C14 N3 H3 107(2) . . ?
 N1 C1 H1A 109.5 . . ?
 N1 C1 H1B 109.5 . . ?
 N1 C1 H1C 109.5 . . ?
 H1A C1 H1B 109.5 . . ?
 H1A C1 H1C 109.5 . . ?
 H1B C1 H1C 109.5 . . ?
 S1 C2 H2A 109.2 . . ?
 S1 C2 H2B 109.2 . . ?
 H2A C2 H2B 107.9 . . ?
 C3 C2 S1 112.3(2) . . ?
 C3 C2 H2A 109.2 . . ?
 C3 C2 H2B 109.2 . . ?
 C4 C3 C2 120.2(3) . . ?
 C10 C3 C2 119.7(3) . . ?
 C10 C3 C4 120.2(3) . . ?
 C3 C4 H4 118.9 . . ?
 C5 C4 C3 122.1(3) . . ?
 C5 C4 H4 118.9 . . ?
 C4 C5 H5 121.3 . . ?
 C4 C5 C6 117.4(3) . . ?
 C6 C5 H5 121.3 . . ?
 N2 C6 C5 131.0(3) . . ?
 N2 C6 C9 107.5(3) . . ?
 C5 C6 C9 121.5(3) . . ?
 N2 C7 H7 124.8 . . ?
 C8 C7 N2 110.5(3) . . ?
 C8 C7 H7 124.8 . . ?
 C7 C8 C9 105.9(3) . . ?
 C7 C8 C11 128.6(3) . . ?
 C9 C8 C11 125.5(3) . . ?
 C6 C9 C8 107.4(3) . . ?
 C10 C9 C6 119.9(3) . . ?
 C10 C9 C8 132.7(3) . . ?
 C3 C10 C9 118.9(3) . . ?
 C3 C10 H10 120.6 . . ?
 C9 C10 H10 120.6 . . ?
 C8 C11 H11A 109.2 . . ?
 C8 C11 H11B 109.2 . . ?
 C8 C11 C12 111.9(3) . . ?
 H11A C11 H11B 107.9 . . ?
 C12 C11 H11A 109.2 . . ?
 C12 C11 H11B 109.2 . . ?
 N3 C12 C11 111.9(3) . . ?
 N3 C12 H12A 109.2 . . ?
 N3 C12 H12B 109.2 . . ?
 C11 C12 H12A 109.2 . . ?
 C11 C12 H12B 109.2 . . ?
 H12A C12 H12B 107.9 . . ?
 N3 C13 H13A 109.5 . . ?
 N3 C13 H13B 109.5 . . ?
 N3 C13 H13C 109.5 . . ?
 H13A C13 H13B 109.5 . . ?
 H13A C13 H13C 109.5 . . ?
 H13B C13 H13C 109.5 . . ?
 N3 C14 H14A 109.5 . . ?
 N3 C14 H14B 109.5 . . ?
 N3 C14 H14C 109.5 . . ?
 H14A C14 H14B 109.5 . . ?
 H14A C14 H14C 109.5 . . ?
 H14B C14 H14C 109.5 . . ?
 O1A S1A N1A 106.70(15) . . ?
 O1A S1A C2A 107.68(15) . . ?
 O2A S1A O1A 118.54(15) . . ?
 O2A S1A N1A 108.15(14) . . ?
 O2A S1A C2A 107.13(14) . . ?
 N1A S1A C2A 108.29(15) . . ?
 S1A N1A H1AA 114(3) . . ?
 C1A N1A S1A 120.0(2) . . ?
 C1A N1A H1AA 112(3) . . ?
 C6A N2A H2AA 125(2) . . ?
 C6A N2A C7A 108.9(3) . . ?
 C7A N2A H2AA 126(2) . . ?
 C12A N3A H3A 104(3) . . ?
 C13A N3A H3A 112(4) . . ?
 C13A N3A C12A 112.6(2) . . ?
 C13A N3A C14A 109.9(2) . . ?
 C14A N3A H3A 107(3) . . ?
 C14A N3A C12A 110.8(2) . . ?
 N1A C1A H1AB 109.5 . . ?
 N1A C1A H1AC 109.5 . . ?
 N1A C1A H1AD 109.5 . . ?
 H1AB C1A H1AC 109.5 . . ?
 H1AB C1A H1AD 109.5 . . ?
 H1AC C1A H1AD 109.5 . . ?
 S1A C2A H2AB 109.2 . . ?
 S1A C2A H2AC 109.2 . . ?
 H2AB C2A H2AC 107.9 . . ?
 C3A C2A S1A 112.1(2) . . ?
 C3A C2A H2AB 109.2 . . ?
 C3A C2A H2AC 109.2 . . ?
 C4A C3A C2A 120.1(3) . . ?
 C10A C3A C2A 119.6(3) . . ?
 C10A C3A C4A 120.2(3) . . ?
 C3A C4A H4A 119.0 . . ?
 C5A C4A C3A 121.9(3) . . ?
 C5A C4A H4A 119.0 . . ?
 C4A C5A H5A 121.3 . . ?
 C4A C5A C6A 117.3(3) . . ?
 C6A C5A H5A 121.3 . . ?
 N2A C6A C5A 130.2(3) . . ?
 N2A C6A C9A 107.5(3) . . ?
 C5A C6A C9A 122.3(3) . . ?
 N2A C7A H7A 124.9 . . ?
 C8A C7A N2A 110.3(3) . . ?
 C8A C7A H7A 124.9 . . ?
 C7A C8A C9A 106.2(3) . . ?
 C7A C8A C11A 128.4(3) . . ?
 C9A C8A C11A 125.5(3) . . ?
 C6A C9A C8A 107.2(3) . . ?
 C10A C9A C6A 119.1(3) . . ?
 C10A C9A C8A 133.7(3) . . ?
 C3A C10A C9A 119.2(3) . . ?
 C3A C10A H10A 120.4 . . ?
 C9A C10A H10A 120.4 . . ?
 C8A C11A H11C 109.2 . . ?
 C8A C11A H11D 109.2 . . ?
 C8A C11A C12A 112.1(3) . . ?
 H11C C11A H11D 107.9 . . ?
 C12A C11A H11C 109.2 . . ?
 C12A C11A H11D 109.2 . . ?
 N3A C12A C11A 112.2(3) . . ?
 N3A C12A H12C 109.2 . . ?
 N3A C12A H12D 109.2 . . ?
 C11A C12A H12C 109.2 . . ?
 C11A C12A H12D 109.2 . . ?
 H12C C12A H12D 107.9 . . ?
 N3A C13A H13D 109.5 . . ?
 N3A C13A H13E 109.5 . . ?
 N3A C13A H13F 109.5 . . ?
 H13D C13A H13E 109.5 . . ?
 H13D C13A H13F 109.5 . . ?
 H13E C13A H13F 109.5 . . ?
 N3A C14A H14D 109.5 . . ?
 N3A C14A H14E 109.5 . . ?
 N3A C14A H14F 109.5 . . ?
 H14D C14A H14E 109.5 . . ?
 H14D C14A H14F 109.5 . . ?
 H14E C14A H14F 109.5 . . ?
 C4B O4B H4B 117(3) . . ?
 O1B C1B C2B 114.6(3) . . ?
 O2B C1B O1B 124.1(3) . . ?
 O2B C1B C2B 121.3(3) . . ?
 C1B C2B H2BA 108.6 . . ?
 C1B C2B H2BB 108.6 . . ?
 C1B C2B C3B 114.7(2) . . ?
 H2BA C2B H2BB 107.6 . . ?
 C3B C2B H2BA 108.6 . . ?
 C3B C2B H2BB 108.6 . . ?
 C2B C3B H3BA 108.8 . . ?
 C2B C3B H3BB 108.8 . . ?
 H3BA C3B H3BB 107.7 . . ?
 C4B C3B C2B 114.0(3) . . ?
 C4B C3B H3BA 108.8 . . ?
 C4B C3B H3BB 108.8 . . ?
 O3B C4B O4B 123.7(3) . . ?
 O3B C4B C3B 124.9(3) . . ?
 O4B C4B C3B 111.3(3) . . ?
 C4C O4C H4C 104(3) . . ?
 O1C C1C O2C 123.1(3) . . ?
 O1C C1C C2C 120.5(3) . . ?
 O2C C1C C2C 116.4(3) . . ?
 C1C C2C H2CA 109.1 . . ?
 C1C C2C H2CB 109.1 . . ?
 H2CA C2C H2CB 107.8 . . ?
 C3BC C2C C1C 112.6(3) . . ?
 C3BC C2C H2CA 109.1 . . ?
 C3BC C2C H2CB 109.1 . . ?
 C2C C3BC H3BC 109.3 . . ?
 C2C C3BC H3BD 109.3 . . ?
 H3BC C3BC H3BD 107.9 . . ?
 C4C C3BC C2C 111.7(3) . . ?
 C4C C3BC H3BC 109.3 . . ?
 C4C C3BC H3BD 109.3 . . ?
 O3C C4C O4C 122.7(3) . . ?
 O3C C4C C3BC 123.2(3) . . ?
 O4C C4C C3BC 114.1(3) . . ?
 C1S O1S H1S 106(3) . . ?
 O1S C1S H1SA 108.9 . . ?
 O1S C1S H1SB 108.9 . . ?
 O1S C1S C2S 113.3(3) . . ?
 H1SA C1S H1SB 107.7 . . ?
 C2S C1S H1SA 108.9 . . ?
 C2S C1S H1SB 108.9 . . ?
 C1S C2S H2SA 109.5 . . ?
 C1S C2S H2SB 109.5 . . ?
 C1S C2S H2SC 109.5 . . ?
 H2SA C2S H2SB 109.5 . . ?
 H2SA C2S H2SC 109.5 . . ?
 H2SB C2S H2SC 109.5 . . ?

loop_
  _geom_hbond_atom_site_label_D
  _geom_hbond_atom_site_label_H
  _geom_hbond_atom_site_label_A
  _geom_hbond_distance_DH
  _geom_hbond_distance_HA
  _geom_hbond_distance_DA
  _geom_hbond_angle_DHA
  _geom_hbond_site_symmetry_A
  _geom_hbond_publ_flag
 N2A H2AA O3C 0.89(2) 2.01(3) 2.866(4) 161(4) 1_455 yes

loop_
  _geom_torsion_atom_site_label_1
  _geom_torsion_atom_site_label_2
  _geom_torsion_atom_site_label_3
  _geom_torsion_atom_site_label_4
  _geom_torsion
  _geom_torsion_site_symmetry_1
  _geom_torsion_site_symmetry_2
  _geom_torsion_site_symmetry_3
  _geom_torsion_site_symmetry_4
  _geom_torsion_publ_flag
 S1 C2 C3 C4 -102.3(3) . . . . ?
 S1 C2 C3 C10 77.0(3) . . . . ?
 O1 S1 N1 C1 -174.1(3) . . . . ?
 O1 S1 C2 C3 65.5(3) . . . . ?
 O2 S1 N1 C1 -45.0(3) . . . . ?
 O2 S1 C2 C3 -63.6(3) . . . . ?
 N1 S1 C2 C3 -179.7(2) . . . . ?
 N2 C6 C9 C8 0.2(4) . . . . ?
 N2 C6 C9 C10 -179.5(3) . . . . ?
 N2 C7 C8 C9 0.4(4) . . . . ?
 N2 C7 C8 C11 -180.0(3) . . . . ?
 C2 S1 N1 C1 70.3(3) . . . . ?
 C2 C3 C4 C5 179.5(3) . . . . ?
 C2 C3 C10 C9 -178.7(3) . . . . ?
 C3 C4 C5 C6 -0.5(5) . . . . ?
 C4 C3 C10 C9 0.6(5) . . . . ?
 C4 C5 C6 N2 -179.6(3) . . . . ?
 C4 C5 C6 C9 -0.1(5) . . . . ?
 C5 C6 C9 C8 -179.4(3) . . . . ?
 C5 C6 C9 C10 0.9(5) . . . . ?
 C6 N2 C7 C8 -0.3(4) . . . . ?
 C6 C9 C10 C3 -1.1(4) . . . . ?
 C7 N2 C6 C5 179.6(4) . . . . ?
 C7 N2 C6 C9 0.0(4) . . . . ?
 C7 C8 C9 C6 -0.4(4) . . . . ?
 C7 C8 C9 C10 179.3(3) . . . . ?
 C7 C8 C11 C12 -20.9(5) . . . . ?
 C8 C9 C10 C3 179.3(3) . . . . ?
 C8 C11 C12 N3 -168.4(3) . . . . ?
 C9 C8 C11 C12 158.7(3) . . . . ?
 C10 C3 C4 C5 0.2(5) . . . . ?
 C11 C8 C9 C6 180.0(3) . . . . ?
 C11 C8 C9 C10 -0.4(6) . . . . ?
 C13 N3 C12 C11 -68.2(3) . . . . ?
 C14 N3 C12 C11 167.6(3) . . . . ?
 S1A C2A C3A C4A -101.5(3) . . . . ?
 S1A C2A C3A C10A 75.7(3) . . . . ?
 O1A S1A N1A C1A -174.5(2) . . . . ?
 O1A S1A C2A C3A 69.5(2) . . . . ?
 O2A S1A N1A C1A -45.9(3) . . . . ?
 O2A S1A C2A C3A -59.1(2) . . . . ?
 N1A S1A C2A C3A -175.5(2) . . . . ?
 N2A C6A C9A C8A 0.3(3) . . . . ?
 N2A C6A C9A C10A 179.6(3) . . . . ?
 N2A C7A C8A C9A 0.0(4) . . . . ?
 N2A C7A C8A C11A -179.5(3) . . . . ?
 C2A S1A N1A C1A 69.9(3) . . . . ?
 C2A C3A C4A C5A 177.2(3) . . . . ?
 C2A C3A C10A C9A -176.2(3) . . . . ?
 C3A C4A C5A C6A -0.8(5) . . . . ?
 C4A C3A C10A C9A 1.0(4) . . . . ?
 C4A C5A C6A N2A -178.3(3) . . . . ?
 C4A C5A C6A C9A 0.5(5) . . . . ?
 C5A C6A C9A C8A -178.8(3) . . . . ?
 C5A C6A C9A C10A 0.5(5) . . . . ?
 C6A N2A C7A C8A 0.2(4) . . . . ?
 C6A C9A C10A C3A -1.3(4) . . . . ?
 C7A N2A C6A C5A 178.7(3) . . . . ?
 C7A N2A C6A C9A -0.3(4) . . . . ?
 C7A C8A C9A C6A -0.2(3) . . . . ?
 C7A C8A C9A C10A -179.4(3) . . . . ?
 C7A C8A C11A C12A -17.8(5) . . . . ?
 C8A C9A C10A C3A 177.8(3) . . . . ?
 C8A C11A C12A N3A -173.0(3) . . . . ?
 C9A C8A C11A C12A 162.8(3) . . . . ?
 C10A C3A C4A C5A 0.1(5) . . . . ?
 C11A C8A C9A C6A 179.3(3) . . . . ?
 C11A C8A C9A C10A 0.2(6) . . . . ?
 C13A N3A C12A C11A -74.2(3) . . . . ?
 C14A N3A C12A C11A 162.3(3) . . . . ?
 O1B C1B C2B C3B 175.7(3) . . . . ?
 O2B C1B C2B C3B -4.5(4) . . . . ?
 C1B C2B C3B C4B -66.1(4) . . . . ?
 C2B C3B C4B O3B -10.7(5) . . . . ?
 C2B C3B C4B O4B 172.1(3) . . . . ?
 O1C C1C C2C C3BC -18.6(4) . . . . ?
 O2C C1C C2C C3BC 162.5(3) . . . . ?
 C1C C2C C3BC C4C -60.2(4) . . . . ?
 C2C C3BC C4C O3C -16.7(5) . . . . ?
 C2C C3BC C4C O4C 165.6(3) . . . . ?

_shelx_res_file
;
TITL a_a.res in Pc
    a.res
    created by SHELXL-2018/3 at 12:30:54 on 22-Nov-2023
REM Old TITL a_a.res in Pc
REM SHELXT solution in Pc
REM R1 0.447, Rweak 0.105, Alpha 0.051, Orientation as input
REM Flack x = -0.569 ( 1.054 ) from Parsons' quotients
REM Formula found by SHELXT: C32 N8 O17 S2
REM SHEL 50 0.71
CELL 0.71073 9.8345 12.609 16.9462 90 90.944 90
ZERR 2 0.009 0.0097 0.0158 0 0.027 0
LATT -1
SYMM +X,-Y,0.5+Z
SFAC C H N O S
UNIT 76 120 12 26 4
EQIV $1 -1+X,+Y,+Z
DFIX 0.85 O4C H4C O1S H1S O4B H4B
DFIX 0.88 N3A H3A N2A H2Aa N1A H1Aa N1 H1 N2 H2 N3 H3

L.S. 4 0 0
PLAN  14
SIZE 0.21 0.34 0.39
TEMP -173.15
CONF
HTAB N2A O3C_$1
list 4
MORE -1
BOND $H
fmap 2 53
acta
MERG 2
TWIN -1 0 0 0 -1 0 0 0 -1 2
REM <olex2.extras>
REM <HklSrc "%.\\a.hkl">
REM </olex2.extras>

WGHT    0.054200    0.183200
BASF   0.68365
FVAR       0.39064
S1    5    0.709252    0.367895    0.308610    11.00000    0.01517    0.01607 =
         0.01975    0.00031   -0.00306   -0.00222
O1    4    0.807099    0.293949    0.280977    11.00000    0.02131    0.02266 =
         0.02642   -0.00357   -0.00042    0.00035
O2    4    0.689979    0.465507    0.266587    11.00000    0.02363    0.01964 =
         0.02581    0.00458   -0.00572   -0.00358
N1    3    0.566498    0.306782    0.310053    11.00000    0.01538    0.01631 =
         0.02941    0.00199   -0.00441   -0.00422
H1    2    0.577956    0.241339    0.330184    11.00000    0.05241
N2    3    1.239677    0.634291    0.422398    11.00000    0.01378    0.02224 =
         0.03216   -0.00242   -0.00779    0.00034
H2    2    1.324222    0.628069    0.442204    11.00000    0.03294
N3    3    0.918156    1.006497    0.354079    11.00000    0.01471    0.01689 =
         0.01973   -0.00058   -0.00203    0.00017
H3    2    0.842990    0.989027    0.379563    11.00000    0.01793
C1    1    0.443435    0.365073    0.328580    11.00000    0.01647    0.02477 =
         0.03963    0.00241   -0.00019    0.00261
AFIX 137
H1A   2    0.438392    0.429525    0.296346    11.00000   -1.50000
H1B   2    0.445203    0.384427    0.384596    11.00000   -1.50000
H1C   2    0.363802    0.320536    0.317280    11.00000   -1.50000
AFIX   0
C2    1    0.753942    0.401390    0.407904    11.00000    0.01918    0.02374 =
         0.01952   -0.00012   -0.00116   -0.00522
AFIX  23
H2A   2    0.681284    0.446014    0.430295    11.00000   -1.20000
H2B   2    0.760351    0.335671    0.439714    11.00000   -1.20000
AFIX   0
C3    1    0.886358    0.459735    0.413682    11.00000    0.01751    0.02234 =
         0.01671   -0.00274   -0.00154   -0.00473
C4    1    1.004794    0.406646    0.438527    11.00000    0.02597    0.01930 =
         0.01875   -0.00018   -0.00469   -0.00342
AFIX  43
H4    2    0.999240    0.333630    0.451919    11.00000   -1.20000
AFIX   0
C5    1    1.129052    0.456947    0.444158    11.00000    0.02120    0.02073 =
         0.02091   -0.00072   -0.00690    0.00075
AFIX  43
H5    2    1.208436    0.420190    0.461435    11.00000   -1.20000
AFIX   0
C6    1    1.133588    0.564151    0.423441    11.00000    0.01816    0.02099 =
         0.01789   -0.00086   -0.00496   -0.00112
C7    1    1.192006    0.731105    0.396804    11.00000    0.01559    0.01925 =
         0.03457   -0.00373   -0.00375   -0.00162
AFIX  43
H7    2    1.246281    0.792896    0.391235    11.00000   -1.20000
AFIX   0
C8    1    1.055932    0.725965    0.380544    11.00000    0.01540    0.01939 =
         0.02534   -0.00232   -0.00402    0.00166
C9    1    1.016202    0.618876    0.397679    11.00000    0.01567    0.01975 =
         0.01948   -0.00447   -0.00341    0.00087
C10   1    0.891552    0.566423    0.393474    11.00000    0.01539    0.02030 =
         0.01936   -0.00387   -0.00453    0.00107
AFIX  43
H10   2    0.811503    0.602999    0.377070    11.00000   -1.20000
AFIX   0
C11   1    0.962889    0.812028    0.351337    11.00000    0.01585    0.01904 =
         0.03499   -0.00366   -0.00591    0.00035
AFIX  23
H11A  2    0.873869    0.805154    0.377292    11.00000   -1.20000
H11B  2    0.947653    0.803617    0.293784    11.00000   -1.20000
AFIX   0
C12   1    1.020875    0.921649    0.367889    11.00000    0.01443    0.01876 =
         0.02096    0.00024   -0.00442   -0.00059
AFIX  23
H12A  2    1.053739    0.924963    0.423368    11.00000   -1.20000
H12B  2    1.099596    0.934040    0.333408    11.00000   -1.20000
AFIX   0
C13   1    0.879576    1.018941    0.269658    11.00000    0.01870    0.02694 =
         0.01827    0.00311   -0.00328    0.00066
AFIX 137
H13A  2    0.961116    1.033314    0.238953    11.00000   -1.50000
H13B  2    0.815690    1.078162    0.263713    11.00000   -1.50000
H13C  2    0.836417    0.953573    0.250496    11.00000   -1.50000
AFIX   0
C14   1    0.966088    1.109829    0.386861    11.00000    0.01781    0.01795 =
         0.02522    0.00060   -0.00160   -0.00101
AFIX 137
H14A  2    1.045662    1.133882    0.357755    11.00000   -1.50000
H14B  2    0.990866    1.101032    0.442729    11.00000   -1.50000
H14C  2    0.893263    1.162543    0.381663    11.00000   -1.50000
AFIX   0

S1A   5    0.266329   -0.081673    0.701952    11.00000    0.01443    0.01421 =
         0.01863   -0.00047   -0.00286    0.00131
O1A   4    0.170330   -0.156308    0.732445    11.00000    0.01795    0.02001 =
         0.02462    0.00204    0.00129   -0.00102
O2A   4    0.281339    0.018864    0.740733    11.00000    0.02259    0.01575 =
         0.02364   -0.00379   -0.00567    0.00253
N1A   3    0.411109   -0.139429    0.703220    11.00000    0.01211    0.01648 =
         0.03046   -0.00114   -0.00372    0.00231
H1AA  2    0.409661   -0.202771    0.682963    11.00000    0.02311
N2A   3   -0.258472    0.186996    0.592864    11.00000    0.01351    0.01922 =
         0.02959    0.00100   -0.00532   -0.00042
H2AA  2   -0.345603    0.171380    0.585660    11.00000    0.02714
N3A   3    0.067153    0.559427    0.655204    11.00000    0.01367    0.01407 =
         0.02060   -0.00071   -0.00266   -0.00004
H3A   2    0.139391    0.539195    0.628894    11.00000    0.05651
C1A   1    0.532784   -0.080598    0.682285    11.00000    0.01544    0.02515 =
         0.03004    0.00198   -0.00405   -0.00060
AFIX 137
H1AB  2    0.528027   -0.061761    0.626201    11.00000   -1.50000
H1AC  2    0.613303   -0.124624    0.692453    11.00000   -1.50000
H1AD  2    0.538879   -0.015831    0.714115    11.00000   -1.50000
AFIX   0
C2A   1    0.219661   -0.055439    0.602203    11.00000    0.01435    0.01922 =
         0.01756   -0.00157   -0.00256    0.00075
AFIX  23
H2AB  2    0.293460   -0.015081    0.576882    11.00000   -1.20000
H2AC  2    0.208806   -0.123466    0.573616    11.00000   -1.20000
AFIX   0
C3A   1    0.089326    0.006700    0.595375    11.00000    0.01520    0.01850 =
         0.01558    0.00075   -0.00370    0.00007
C4A   1   -0.033333   -0.045199    0.575504    11.00000    0.01975    0.01591 =
         0.01716   -0.00023   -0.00327   -0.00357
AFIX  43
H4A   2   -0.031652   -0.118994    0.564256    11.00000   -1.20000
AFIX   0
C5A   1   -0.155885    0.008010    0.571894    11.00000    0.01405    0.01868 =
         0.01922    0.00055   -0.00480   -0.00559
AFIX  43
H5A   2   -0.237964   -0.027459    0.557773    11.00000   -1.20000
AFIX   0
C6A   1   -0.154390    0.115846    0.589795    11.00000    0.01376    0.01853 =
         0.02037    0.00083   -0.00475   -0.00084
C7A   1   -0.207016    0.284088    0.614996    11.00000    0.01654    0.01694 =
         0.02773   -0.00117   -0.00516   -0.00011
AFIX  43
H7A   2   -0.259602    0.346600    0.621436    11.00000   -1.20000
AFIX   0
C8A   1   -0.070031    0.277841    0.626353    11.00000    0.01509    0.01500 =
         0.02171    0.00096   -0.00426   -0.00111
C9A   1   -0.033644    0.170184    0.610280    11.00000    0.01439    0.01687 =
         0.01807    0.00287   -0.00489   -0.00114
C10A  1    0.089651    0.114366    0.612161    11.00000    0.01317    0.01601 =
         0.02150    0.00034   -0.00482   -0.00039
AFIX  43
H10A  2    0.172407    0.149847    0.624778    11.00000   -1.20000
AFIX   0
C11A  1    0.026627    0.363716    0.651258    11.00000    0.01578    0.01436 =
         0.02705    0.00005   -0.00609   -0.00006
AFIX  23
H11C  2    0.110616    0.358006    0.620128    11.00000   -1.20000
H11D  2    0.051787    0.353878    0.707589    11.00000   -1.20000
AFIX   0
C12A  1   -0.034284    0.473639    0.639823    11.00000    0.01207    0.01391 =
         0.02350   -0.00063   -0.00316   -0.00242
AFIX  23
H12C  2   -0.069904    0.480221    0.585060    11.00000   -1.20000
H12D  2   -0.111550    0.482467    0.675958    11.00000   -1.20000
AFIX   0
C13A  1    0.098058    0.573649    0.740435    11.00000    0.02032    0.02457 =
         0.02062   -0.00136   -0.00497   -0.00242
AFIX 137
H13D  2    0.162224    0.632468    0.747583    11.00000   -1.50000
H13E  2    0.138454    0.508412    0.761768    11.00000   -1.50000
H13F  2    0.013934    0.589472    0.768318    11.00000   -1.50000
AFIX   0
C14A  1    0.019898    0.661531    0.620339    11.00000    0.02048    0.01433 =
         0.02781    0.00120   -0.00623   -0.00078
AFIX 137
H14D  2    0.002484    0.652165    0.563661    11.00000   -1.50000
H14E  2    0.090105    0.715775    0.628475    11.00000   -1.50000
H14F  2   -0.064021    0.683909    0.645917    11.00000   -1.50000
AFIX   0

O1B   4    0.313114    0.501563    0.613102    11.00000    0.01472    0.01775 =
         0.03915   -0.00108    0.00235   -0.00241
O2B   4    0.363299    0.672740    0.619769    11.00000    0.01869    0.01771 =
         0.04012   -0.00352   -0.00175    0.00114
O3B   4    0.519464    0.685717    0.456757    11.00000    0.02262    0.03686 =
         0.02906    0.00710   -0.00911   -0.01287
O4B   4    0.676581    0.794669    0.506607    11.00000    0.02392    0.02200 =
         0.02794    0.00648   -0.00635   -0.00726
H4B   2    0.664834    0.836421    0.468268    11.00000    0.04364
C1B   1    0.395388    0.579202    0.608820    11.00000    0.01614    0.01720 =
         0.01934   -0.00049   -0.00270   -0.00061
C2B   1    0.539263    0.548732    0.589189    11.00000    0.01437    0.01575 =
         0.02996    0.00356   -0.00178    0.00067
AFIX  23
H2BA  2    0.537341    0.505999    0.540174    11.00000   -1.20000
H2BB  2    0.576042    0.503169    0.632063    11.00000   -1.20000
AFIX   0
C3B   1    0.635083    0.641423    0.578049    11.00000    0.01427    0.02290 =
         0.02773    0.00753   -0.00542   -0.00332
AFIX  23
H3BA  2    0.633548    0.686371    0.625926    11.00000   -1.20000
H3BB  2    0.728716    0.613817    0.572689    11.00000   -1.20000
AFIX   0
C4B   1    0.601301    0.708623    0.507883    11.00000    0.01562    0.02007 =
         0.02227    0.00237   -0.00253   -0.00204

O1C   4    0.624958    0.104676    0.376943    11.00000    0.01916    0.01922 =
         0.03230    0.00558    0.00169   -0.00027
O2C   4    0.676748   -0.062771    0.401890    11.00000    0.01720    0.01956 =
         0.02653    0.00358    0.00015   -0.00044
O3C   4    0.482547    0.103265    0.544177    11.00000    0.01803    0.02163 =
         0.02511    0.00121   -0.00612   -0.00045
O4C   4    0.356467    0.237620    0.500883    11.00000    0.03194    0.02499 =
         0.03119   -0.00208   -0.00623    0.00981
H4C   2    0.389590    0.260207    0.545328    11.00000    0.03038
C1C   1    0.591573    0.013332    0.394836    11.00000    0.01747    0.02064 =
         0.01834    0.00147   -0.00275   -0.00377
C2C   1    0.444442   -0.013724    0.408149    11.00000    0.01210    0.02180 =
         0.02357    0.00083   -0.00262   -0.00240
AFIX  23
H2CA  2    0.407704   -0.051362    0.361169    11.00000   -1.20000
H2CB  2    0.438474   -0.062371    0.453817    11.00000   -1.20000
AFIX   0
C3BC  1    0.358930    0.082447    0.423271    11.00000    0.01285    0.02663 =
         0.02445    0.00069   -0.00485    0.00065
AFIX  23
H3BC  2    0.361883    0.130016    0.376853    11.00000   -1.20000
H3BD  2    0.263315    0.060390    0.430441    11.00000   -1.20000
AFIX   0
C4C   1    0.407119    0.141375    0.494715    11.00000    0.01267    0.02207 =
         0.02327    0.00445   -0.00054   -0.00162

O1S   4    0.429865    0.317837    0.631747    11.00000    0.03732    0.01878 =
         0.03098    0.00262   -0.00402    0.00142
H1S   2    0.396668    0.379639    0.635521    11.00000    0.04456
C1S   1    0.408379    0.267659    0.705999    11.00000    0.03678    0.04078 =
         0.03923    0.01593   -0.00967   -0.00910
AFIX  23
H1SA  2    0.391443    0.191163    0.697078    11.00000   -1.20000
H1SB  2    0.326052    0.298168    0.730022    11.00000   -1.20000
AFIX   0
C2S   1    0.522222    0.279508    0.760844    11.00000    0.04329    0.08236 =
         0.03022    0.01043   -0.00810   -0.02363
AFIX 137
H2SA  2    0.599839    0.238518    0.741946    11.00000   -1.50000
H2SB  2    0.496299    0.253457    0.812963    11.00000   -1.50000
H2SC  2    0.547418    0.354551    0.764664    11.00000   -1.50000
AFIX   0
HKLF 4


REM  a_a.res in Pc
REM wR2 = 0.1186, GooF = S = 1.025, Restrained GooF = 1.025 for all data
REM R1 = 0.0467 for 9088 Fo > 4sig(Fo) and 0.0561 for all 10388 data
REM 576 parameters refined using 11 restraints

END

WGHT      0.0561      0.1619

REM Highest difference peak  0.705,  deepest hole -0.458,  1-sigma level  0.068
Q1    1   0.7376  0.3812  0.3593  11.00000  0.05    0.71
Q2    1   0.2379 -0.0667  0.6558  11.00000  0.05    0.66
Q3    1   0.6785  0.3917  0.2652  11.00000  0.05    0.51
Q4    1   0.2944 -0.0536  0.7464  11.00000  0.05    0.43
Q5    1   0.7108  0.4353  0.3061  11.00000  0.05    0.42
Q6    1  -0.0252  0.3212  0.6390  11.00000  0.05    0.42
Q7    1   0.0840  0.5646  0.6995  11.00000  0.05    0.39
Q8    1   0.2626 -0.0034  0.7025  11.00000  0.05    0.39
Q9    1   0.3819  0.1084  0.4614  11.00000  0.05    0.38
Q10   1   1.0124  0.7727  0.3740  11.00000  0.05    0.37
Q11   1   1.0210  0.6760  0.3829  11.00000  0.05    0.36
Q12   1   0.9671  0.9619  0.3576  11.00000  0.05    0.36
Q13   1   0.0229  0.5141  0.6461  11.00000  0.05    0.35
Q14   1  -0.0470  0.2229  0.6212  11.00000  0.05    0.35
;
_shelx_res_checksum                3679
_shelx_hkl_file
;
   1   0   0 13.4676 1.07221   3
  -1   0   0 13.7794 1.02874   3
  -2   0   0 652.828 47.1525   3
   2   0   0 694.239 47.1807   3
   3   0   0 973.678 66.5264   3
  -3   0   0 925.092 66.4841   3
   4   0   0 124.547 8.91556   3
  -4   0   0 120.312 8.85952   3
   5   0   0 21.0530 2.09969   3
  -5   0   0 22.9847 1.99958   3
   6   0   0 100.007 7.98914   3
  -6   0   0 101.905 7.89832   3
  -7   0   0 297.951 21.4979   3
  -8   0   0 2.51013 1.33976   3
  -1  -1   0 125.799 9.21949   2
  -1  -1   0 123.899 9.15528   4
   1  -1   0 140.159 9.21453   3
   1   1   0 125.715 9.21123   2
   1   1   0 125.467 9.15595   4
  -1   1   0 138.155 9.20503   3
  -2  -1   0 325.046 23.8048   2
  -2  -1   0 322.082 23.5929   3
  -2  -1   0 307.089 23.6300   4
   2  -1   0 371.099 23.7570   3
   2   1   0 380.980 23.6398   3
   2   1   0 317.602 23.6341   4
  -2   1   0 342.953 23.7202   3
   2   1   0 327.727 23.8038   2
  -3  -1   0 807.703 63.4224   4
   3  -1   0 993.195 63.6208   3
  -3  -1   0 867.389 63.4301   3
   3   1   0 898.676 63.7434   2
  -3   1   0 926.688 63.5688   3
   3   1   0 1013.30 63.5063   3
   3   1   0 840.353 63.4308   4
  -4  -1   0 13.4706 1.36749   3
  -4  -1   0 15.0651 1.36580   4
   4  -1   0 16.4796 1.59304   3
  -4   1   0 14.6366 1.50555   3
   4   1   0 20.2027 1.57088   3
   4   1   0 16.8294 1.39610   4
   4   1   0 15.8516 1.79167   2
  -5  -1   0 285.622 22.2548   3
   5  -1   0 321.069 22.4734   3
   5   1   0 344.817 22.4190   3
  -5   1   0 305.724 22.4305   3
  -6  -1   0 203.820 15.5745   3
  -6   1   0 216.853 15.7461   3
   6   1   0 229.214 15.7567   3
  -7  -1   0 51.0706 4.28320   3
  -7   1   0 51.3947 4.50057   3
  -8   1   0 4.29094 1.77368   3
   0  -2   0 803.576 57.1731   3
   0  -2   0 797.518 57.1716   4
   0   2   0 819.472 57.1762   4
   0   2   0 849.262 57.1833   3
  -1  -2   0 816.943 55.9830   4
  -1  -2   0 830.486 56.0135   2
   1  -2   0 755.852 56.0133   3
   1  -2   0 789.958 55.9461   2
   1   2   0 806.003 55.9786   4
   1   2   0 722.424 55.9564   5
  -1   2   0 877.229 56.0346   3
  -2  -2   0 12.1716 1.11488   4
  -2  -2   0 12.9250 1.24441   2
   2  -2   0 13.6970 1.20746   3
   2   2   0 12.6313 1.13130   4
  -2   2   0 12.9617 1.18690   3
   2   2   0 12.5373 1.23553   2
   3  -2   0 338.426 25.9008   3
  -3  -2   0 350.835 25.5762   2
  -3  -2   0 344.778 25.3465   4
  -3   2   0 399.224 25.5127   3
   3   2   0 356.550 25.3522   4
   3   2   0 368.506 25.6008   2
  -4  -2   0 26.4884 2.36737   4
   4  -2   0 30.9957 2.61707   3
  -4   2   0 31.5104 2.56020   3
  -5  -2   0 951.187 66.1399   3
  -5  -2   0 894.706 66.1506   4
  -5   2   0 1036.72 66.4651   3
   5   2   0 892.692 66.1593   4
  -6  -2   0 63.2294 4.79202   3
  -6  -2   0 56.6037 4.71950   4
  -6   2   0 65.4016 5.13000   3
   6   2   0 74.3146 5.06131   3
   6   2   0 54.8623 4.77398   4
  -7   2   0 139.965 11.2670   3
   7   2   0 158.264 11.2344   3
  -8   2   0 22.4376 3.02041   3
  -9   2   0 26.7082 3.45007   3
   0  -3   0 1117.05 87.8217   3
   0  -3   0 1320.06 87.8472   4
   0   3   0 1277.95 87.8443   4
   0   3   0 1308.84 87.8599   3
   1  -3   0 250.331 16.5066   3
  -1  -3   0 247.788 16.4522   2
   1  -3   0 221.875 16.3741   2
   1  -3   0 224.065 16.3626   4
  -1  -3   0 220.715 16.4348   4
  -1  -3   0 251.523 16.3958   5
   1   3   0 218.276 16.4311   4
  -1   3   0 209.559 16.3732   2
  -1   3   0 249.183 16.5047   3
  -1   3   0 232.567 16.3829   4
   2  -3   0 56.8256 4.53633   2
  -2  -3   0 59.6314 4.67986   2
   2  -3   0 62.9383 4.70274   3
  -2  -3   0 59.0986 4.57045   5
  -2  -3   0 62.2762 4.60503   4
   2   3   0 63.6005 4.64157   2
   2   3   0 60.7490 4.59176   4
  -2   3   0 72.2867 4.74143   3
  -3  -3   0 8.64000 1.00858   4
  -3  -3   0 9.60056 1.22400   2
   3  -3   0 8.53766 1.14038   3
  -3  -3   0 9.93220 1.02015   5
  -3   3   0 11.1281 1.14098   3
   3   3   0 9.69350 1.05945   4
   3   3   0 9.33651 1.23511   2
  -4  -3   0 352.975 25.9680   4
  -4  -3   0 353.243 26.2537   2
  -4   3   0 406.074 26.2055   3
   4   3   0 357.059 25.9732   4
  -5  -3   0 216.074 16.3246   4
  -5   3   0 241.448 16.6195   3
  -6  -3   0 127.109 9.92029   4
  -6   3   0 145.827 10.3434   3
  -7  -3   0 10.7542 1.54330   4
   7   3   0 6.72140 1.65607   3
  -7   3   0 9.18212 1.94331   3
  -8  -3   0 2.23172 1.14458   4
  -8   3   0 0.52300 1.40472   3
  -9  -3   0 129.594 9.84584   4
  -9   3   0 130.899 10.4521   3
   0  -4   0 122.920 8.40931   2
   0  -4   0 113.567 8.48754   3
   0  -4   0 108.523 8.46481   4
   0   4   0 123.642 8.53147   3
   0   4   0 112.739 8.47453   4
   0   4   0 126.676 8.42990   2
   1  -4   0 20.3960 1.66988   2
  -1  -4   0 17.7065 1.66453   3
   1  -4   0 20.6083 1.70461   4
  -1  -4   0 24.3201 1.77476   2
  -1  -4   0 19.7806 1.78539   4
   1  -4   0 22.6420 1.84692   3
   1   4   0 26.1858 1.74094   2
  -1   4   0 22.3554 1.87387   3
  -1   4   0 19.8788 1.69288   2
   1   4   0 19.8094 1.89398   4
  -1   4   0 22.6690 1.76519   4
  -2  -4   0 245.776 16.3947   5
   2  -4   0 224.122 16.3638   2
  -2  -4   0 217.283 16.4309   4
   2  -4   0 213.774 16.5142   3
  -2  -4   0 219.734 16.5001   2
   2   4   0 253.946 16.4448   2
  -2   4   0 250.974 16.5820   3
   2   4   0 222.700 16.4345   4
  -3  -4   0 546.157 38.1947   4
  -3  -4   0 499.705 38.1575   5
   3  -4   0 526.606 38.1339   2
  -3   4   0 594.807 38.3695   3
   3   4   0 557.105 38.1982   4
   3   4   0 527.278 38.2574   2
  -4  -4   0 394.003 30.8831   5
  -4  -4   0 428.913 31.1312   2
  -4  -4   0 439.700 31.1137   4
  -4   4   0 483.168 31.1244   3
  -5  -4   0 229.078 18.0125   2
  -5  -4   0 238.871 17.7107   4
  -5   4   0 273.176 18.0724   3
  -6  -4   0 37.2640 3.39215   4
  -6   4   0 43.8027 3.78926   3
  -7  -4   0 55.4093 4.65585   4
  -7   4   0 59.2575 5.17943   3
  -8  -4   0 144.030 10.5839   4
  -8   4   0 137.297 11.0938   3
  -9  -4   0 27.7173 3.18025   4
  -9   4   0 31.2637 3.79040   3
 -10  -4   0 24.3331 3.16811   4
 -13  -4   0 64.7835 6.10350   5
   0  -5   0 295.612 21.9474   4
   0  -5   0 324.014 21.8741   2
   0   5   0 326.690 21.8992   2
   0   5   0 291.354 22.0007   3
   0   5   0 313.367 21.9789   4
  -1  -5   0 656.409 45.9373   4
  -1  -5   0 756.511 45.9287   2
   1  -5   0 566.651 45.9477   3
   1  -5   0 646.468 45.8078   2
  -1  -5   0 595.876 45.8256   3
   1  -5   0 659.944 45.8545   4
  -1   5   0 690.598 45.9880   4
  -1   5   0 614.434 45.8311   2
  -1   5   0 685.530 46.0395   3
   1   5   0 661.430 45.9435   4
  -2  -5   0 91.2670 6.81629   4
  -2  -5   0 95.4067 6.89759   2
   2  -5   0 87.9768 6.62686   4
   2  -5   0 90.7783 6.68320   2
  -2  -5   0 109.328 6.73390   5
   2  -5   0 86.9332 6.91724   3
   2   5   0 81.1072 6.71936   5
  -3  -5   0 174.947 12.7803   5
  -3  -5   0 177.695 12.8610   4
  -3  -5   0 165.194 12.9681   2
   3  -5   0 178.143 12.7653   2
  -3   5   0 193.114 13.0745   3
  -4  -5   0 251.427 18.0720   5
  -4  -5   0 253.720 18.0921   4
  -4  -5   0 236.534 18.2916   2
   4  -5   0 234.134 17.9921   2
  -4   5   0 285.219 18.4141   3
  -5  -5   0 45.1542 3.88005   5
  -5  -5   0 44.7367 3.90052   4
  -5  -5   0 48.0864 4.27507   2
  -5   5   0 51.4053 4.19841   3
  -6  -5   0 57.7399 5.26565   5
  -6  -5   0 67.0278 5.74820   2
  -6  -5   0 72.6475 5.34495   4
  -6   5   0 67.5212 5.64661   3
  -7  -5   0 107.061 7.72748   4
  -7  -5   0 91.6613 7.72346   5
  -7   5   0 97.8101 8.08927   3
  -8  -5   0 22.8920 2.66324   5
  -8  -5   0 27.8100 2.81870   4
  -8   5   0 16.4061 3.01971   3
  -9  -5   0 20.8680 2.78340   4
  -9  -5   0 19.5863 2.86198   5
  -9   5   0 16.1286 3.03152   3
 -10  -5   0 0.03028 1.62782   4
 -10  -5   0 2.29979 1.36649   5
 -11  -5   0 8.05004 2.39456   4
 -11  -5   0 6.32533 1.77465   5
 -12  -5   0 4.20600 1.58401   5
 -12  -5   0 5.26259 3.24589   4
 -13  -5   0 10.9068 2.45784   5
   0  -6   0 22.9826 2.10538   4
   0   6   0 23.5110 2.24832   3
   0   6   0 22.1727 2.28713   4
   0   6   0 26.6801 2.00103   2
  -1  -6   0 79.8445 6.04121   4
   1  -6   0 79.0340 5.94972   4
  -1  -6   0 88.8172 6.02102   2
   1  -6   0 68.8600 6.04477   3
  -1   6   0 87.6166 6.22595   3
  -1   6   0 81.9853 6.01895   4
   1   6   0 81.5506 5.92037   5
  -1   6   0 76.1518 6.02014   2
  -2  -6   0 84.2222 6.28486   2
   2  -6   0 82.2415 6.07963   4
   2  -6   0 79.2639 6.07516   2
  -2  -6   0 82.9011 6.25164   4
   2   6   0 72.2496 6.13357   5
  -2   6   0 99.1119 6.55069   3
  -3  -6   0 9.93624 1.51077   2
  -3  -6   0 6.51361 0.92757   5
   3  -6   0 7.77722 0.98305   2
  -3  -6   0 6.10257 1.16701   4
  -3   6   0 9.16696 1.47859   3
   4  -6   0 91.0979 6.76523   2
  -4  -6   0 85.1889 7.09992   2
  -4  -6   0 86.0658 6.75077   5
  -4  -6   0 92.0331 6.90204   4
  -4   6   0 96.1385 7.19398   3
  -5  -6   0 59.8096 4.67570   4
  -5  -6   0 58.4715 5.02070   2
   5  -6   0 54.0290 4.48762   2
  -5  -6   0 51.7975 4.51271   5
  -5   6   0 59.2600 5.00455   3
  -6  -6   0 9.28499 1.46019   4
  -6  -6   0 4.68851 1.69214   2
   6  -6   0 3.82700 1.05509   2
  -6  -6   0 4.30402 1.05992   5
  -6   6   0 3.10388 1.56433   3
  -7  -6   0 89.5716 7.35662   2
  -7  -6   0 94.6413 6.88482   4
  -7  -6   0 81.8994 6.73838   5
  -7   6   0 72.8538 7.10130   3
  -8  -6   0 85.3193 6.42752   4
  -8  -6   0 71.8038 6.30677   5
  -8   6   0 72.1549 6.85547   3
  -9  -6   0 27.6669 3.28220   4
  -9  -6   0 22.6409 2.85170   5
  -9   6   0 22.3978 3.67048   3
 -10  -6   0 20.5998 3.15817   4
 -10  -6   0 12.0912 2.32201   5
 -11  -6   0 15.9261 2.99242   4
 -11  -6   0 12.6537 2.44454   5
 -12  -6   0 6.76128 2.96740   4
 -12  -6   0 7.26350 1.89669   5
 -13  -6   0 4.85581 3.51622   4
 -13  -6   0 -0.8110 1.45045   5
   0  -7   0 36.4418 2.72787   4
   0  -7   0 28.6664 2.72330   3
   0   7   0 27.0558 2.75891   3
   1  -7   0 116.412 8.71623   2
  -1  -7   0 113.066 8.90173   4
  -1  -7   0 123.801 8.84296   2
  -1   7   0 131.047 9.13939   3
   2  -7   0 347.784 25.0200   4
  -2  -7   0 327.235 25.0096   3
  -2  -7   0 372.578 25.2431   2
   2  -7   0 359.421 25.0119   2
  -2  -7   0 357.384 25.2073   4
  -2   7   0 358.300 25.4313   3
   3  -7   0 847.397 61.2949   2
  -3  -7   0 857.711 61.4764   4
  -3  -7   0 821.303 61.5675   2
  -3   7   0 965.648 61.8372   3
  -4  -7   0 474.564 36.4966   2
  -4  -7   0 520.266 36.3475   4
  -4  -7   0 524.254 36.1806   5
   4  -7   0 490.318 36.1541   2
  -4   7   0 547.395 36.6841   3
  -5  -7   0 102.403 8.99204   2
   5  -7   0 114.819 8.60673   2
  -5  -7   0 115.025 8.62296   5
  -5  -7   0 121.316 8.81535   4
  -5   7   0 120.059 9.14923   3
  -6  -7   0 147.864 12.0163   2
  -6  -7   0 175.066 11.7424   4
   6  -7   0 144.796 11.4555   2
  -6  -7   0 162.133 11.5806   5
  -6   7   0 143.720 11.9635   3
  -7  -7   0 39.9889 3.52493   4
  -7  -7   0 28.5228 3.08082   5
   7  -7   0 26.4929 3.01482   2
  -7  -7   0 36.8313 3.95598   2
  -7   7   0 32.4157 4.41411   3
  -8  -7   0 45.0667 4.40412   4
  -8  -7   0 44.1497 4.18596   5
   8  -7   0 42.4924 3.95965   2
  -8   7   0 43.3208 4.69250   3
  -9  -7   0 73.3168 6.14639   5
   9  -7   0 69.6949 5.98654   2
 -10  -7   0 49.1820 4.96665   5
 -10  -7   0 58.9494 5.54641   4
 -11  -7   0 12.7897 3.10685   4
 -11  -7   0 11.6046 2.36253   5
 -12  -7   0 40.2064 6.89893   5
 -12  -7   0 40.9571 5.81040   4
  13  -7   0 7.61380 2.19237   2
 -13  -7   0 5.93823 3.84400   4
 -13  -7   0 5.11671 1.92294   5
   0  -8   0 2.15051 0.67590   2
   0  -8   0 3.47126 0.88735   4
   1  -8   0 1.51832 0.56306   2
   1  -8   0 3.50120 0.84434   4
  -1  -8   0 -0.7783 0.87988   3
  -1  -8   0 1.80186 0.82427   4
  -1  -8   0 3.27254 0.86324   2
  -1   8   0 3.47163 1.22173   3
   2  -8   0 44.1861 3.82239   4
  -2  -8   0 51.1549 4.04346   4
  -2  -8   0 39.4736 3.83337   3
   2  -8   0 50.6097 3.76508   2
  -2  -8   0 50.4376 4.05801   2
  -2   8   0 57.4170 4.39722   3
   3  -8   0 28.4375 2.60353   4
   3  -8   0 34.0175 2.62638   2
  -3  -8   0 32.0633 3.07293   2
  -3   8   0 26.1194 3.11267   3
   4  -8   0 21.2664 2.06525   2
  -4  -8   0 20.0400 2.75208   2
  -4  -8   0 20.1931 2.41149   4
  -4   8   0 23.9700 2.92582   3
  -5  -8   0 22.9818 3.59205   2
  -5  -8   0 40.3055 3.10405   5
   5  -8   0 32.2645 2.99936   2
  -5  -8   0 35.7494 3.35812   4
  -5   8   0 35.4834 3.78449   3
  -6  -8   0 0.93804 0.69959   5
  -6  -8   0 0.53655 1.22080   4
   6  -8   0 2.16597 0.88738   2
  -6  -8   0 -0.3639 1.48328   2
  -6   8   0 -0.0649 1.54402   3
  -7  -8   0 96.7726 8.59948   2
   7  -8   0 101.675 8.12800   2
  -7  -8   0 116.396 8.28855   4
  -7  -8   0 108.707 7.98818   5
  -7   8   0 82.7476 8.39651   3
  -8  -8   0 59.6930 6.13443   2
  -8  -8   0 66.6520 5.38457   5
  -8  -8   0 73.6925 5.87334   4
   8  -8   0 61.3943 5.24705   2
  -8   8   0 46.4015 5.84078   3
  -9  -8   0 18.7302 2.54324   5
  -9  -8   0 22.2175 3.29179   4
   9  -8   0 18.4903 2.52728   2
 -10  -8   0 65.6530 5.81658   5
  10  -8   0 64.6994 5.73556   2
 -10  -8   0 65.1455 6.38105   4
 -11  -8   0 0.86615 2.49936   4
  11  -8   0 2.29046 1.50409   2
 -11  -8   0 0.69070 1.31801   5
 -12  -8   0 8.54260 3.43653   4
 -12  -8   0 3.64723 1.68134   5
  12  -8   0 1.77501 1.75535   2
   0  -9   0 33.8547 3.09640   4
   0  -9   0 36.2619 2.95280   2
  -1  -9   0 15.7008 1.98959   2
   1  -9   0 17.0494 1.83368   2
   1  -9   0 22.3189 2.16527   4
  -1  -9   0 23.8425 2.28032   4
  -1   9   0 25.4799 2.64112   3
  -2  -9   0 126.468 9.26045   2
   2  -9   0 123.789 8.93339   2
   2  -9   0 119.792 9.03422   4
  -2  -9   0 122.981 9.23923   4
  -2  -9   0 104.164 9.07705   3
  -2   9   0 139.590 9.62475   3
   3  -9   0 29.8416 2.63194   2
  -3  -9   0 29.1735 3.00495   4
   3  -9   0 28.5452 2.72100   4
  -3   9   0 37.2859 3.51789   3
  -4  -9   0 228.472 18.3360   2
  -4  -9   0 247.254 18.1856   4
   4  -9   0 244.463 17.8791   2
  -4   9   0 276.205 18.7164   3
  -5  -9   0 104.927 7.96816   4
   5  -9   0 97.2158 7.58758   2
  -5  -9   0 94.9880 8.25302   2
  -5   9   0 102.553 8.38575   3
  -6  -9   0 13.3501 1.63713   5
   6  -9   0 8.68517 1.66055   2
  -6   9   0 10.0680 2.46461   3
   7  -9   0 4.50365 1.32402   2
  -7  -9   0 8.12986 1.89051   4
  -7  -9   0 7.15132 2.26292   2
  -7   9   0 6.63769 2.19159   3
  -8  -9   0 62.5132 5.54082   4
   8  -9   0 53.3618 4.89311   2
  -8  -9   0 46.4012 5.85356   2
  -8  -9   0 60.7798 4.99157   5
  -9  -9   0 3.26868 1.24216   5
   9  -9   0 3.30869 1.41941   2
  -9  -9   0 7.98526 2.40964   4
 -10  -9   0 13.4629 3.11075   4
  10  -9   0 6.44652 1.76819   2
 -10  -9   0 10.5320 2.04580   5
 -11  -9   0 27.6818 4.09201   4
  11  -9   0 20.8506 3.11588   2
 -11  -9   0 17.5402 2.94573   5
  12  -9   0 6.85682 2.10531   2
 -12  -9   0 4.43087 3.65243   4
 -12  -9   0 2.19727 1.60294   5
   0 -10   0 47.6659 4.15055   4
   0 -10   0 50.0616 3.96752   2
   1 -10   0 63.7946 5.20842   4
  -1 -10   0 62.9390 5.14665   2
  -1 -10   0 69.8427 5.35266   4
   1 -10   0 62.5114 4.97083   2
  -2 -10   0 43.9443 3.80479   2
   2 -10   0 44.0428 3.43076   2
   2 -10   0 41.5900 3.63903   4
  -2  10   0 35.1898 4.21751   3
   3 -10   0 57.6255 4.54943   2
  -3 -10   0 58.0048 4.98824   4
   3 -10   0 55.5680 4.67527   4
  -3 -10   0 57.9233 5.05776   2
  -3  10   0 59.6346 5.39616   3
  -4 -10   0 138.608 10.3009   4
  -4 -10   0 132.055 10.4410   2
   4 -10   0 135.330 9.88388   2
  -4  10   0 125.743 10.6185   3
  -5 -10   0 8.55115 2.91984   2
   5 -10   0 5.50361 1.19675   2
  -5  10   0 5.05006 1.91163   3
  -6 -10   0 102.068 8.70305   2
  -6 -10   0 118.535 8.42579   4
   6 -10   0 102.290 7.88214   2
  -6  10   0 84.3324 8.57558   3
   7 -10   0 8.62623 1.66217   2
  -7 -10   0 10.4954 2.26568   4
  -7 -10   0 7.04033 1.45701   5
  -7 -10   0 7.22680 2.57965   2
  -8 -10   0 16.4480 2.92067   4
  -8 -10   0 10.8722 1.85794   5
  -8 -10   0 10.4445 3.00701   2
   8 -10   0 11.7809 2.10612   2
  -9 -10   0 6.53928 1.67097   5
   9 -10   0 4.50885 1.56338   2
  -9 -10   0 6.95714 2.58579   4
 -10 -10   0 9.20004 3.19700   4
 -10 -10   0 6.96956 1.81032   5
  10 -10   0 9.12070 2.01830   2
 -11 -10   0 23.8425 4.42542   4
  11 -10   0 18.3943 3.91755   2
   0 -11   0 374.901 27.3782   4
   0 -11   0 387.902 27.1892   2
   1 -11   0 112.012 8.23652   2
  -1 -11   0 124.898 8.68345   4
   1 -11   0 104.932 8.43482   4
  -1 -11   0 100.562 8.40503   2
  -2 -11   0 85.9783 6.59530   4
   2 -11   0 77.7394 6.33705   4
   2 -11   0 81.4132 6.06601   2
  -2 -11   0 71.6158 6.40701   2
   3 -11   0 18.8831 2.03618   2
  -3 -11   0 19.9709 2.97734   2
   3 -11   0 19.4736 2.46040   4
  -3 -11   0 22.0711 3.45160   4
   4 -11   0 48.9913 4.19896   2
  -4 -11   0 53.9685 4.81181   4
  -5 -11   0 127.349 9.52606   4
  -5 -11   0 105.147 9.61083   2
   5 -11   0 122.626 9.01462   2
  -6 -11   0 22.3847 2.98846   4
   6 -11   0 17.2769 2.19587   2
  -6 -11   0 14.7296 3.04528   2
  -7 -11   0 9.37575 2.35071   4
  -7 -11   0 7.24963 2.66777   2
  -8 -11   0 0.37596 1.94384   4
  -8 -11   0 1.27365 2.39854   2
   8 -11   0 3.76532 1.28990   2
   9 -11   0 70.6901 6.35092   2
  -9 -11   0 71.6583 7.32634   4
  -9 -11   0 80.8914 6.37615   5
 -10 -11   0 5.91209 1.56223   5
 -10 -11   0 10.7883 3.42775   4
  10 -11   0 7.59619 1.93994   2
  11 -11   0 55.5777 5.25198   2
 -11 -11   0 49.2621 5.08462   5
   0 -12   0 1.02335 1.22623   4
   0 -12   0 1.78179 1.06963   2
  -1 -12   0 248.420 17.8931   4
   1 -12   0 243.564 17.7764   4
   1 -12   0 245.558 17.4931   2
  -1 -12   0 231.821 17.6716   2
  -2 -12   0 56.7466 5.21071   4
  -2 -12   0 62.1556 5.91312   2
   2 -12   0 55.7699 4.68577   2
   2 -12   0 62.4103 5.06799   4
   3 -12   0 26.4813 2.92775   4
  -3 -12   0 18.0077 3.01804   2
  -3 -12   0 24.4979 3.12684   4
   4 -12   0 44.2310 3.65590   2
  -4 -12   0 37.7620 4.43085   2
  -4 -12   0 42.7383 4.36438   4
  -5 -12   0 0.24311 1.92702   2
  -5 -12   0 1.79326 1.63334   4
   5 -12   0 0.47796 0.82567   2
  -6 -12   0 8.95950 2.35228   4
  -6 -12   0 7.82618 2.50550   2
   6 -12   0 7.58019 1.59879   2
  -7 -12   0 4.94631 2.61699   2
  -7 -12   0 5.88262 2.43619   4
   7 -12   0 6.28469 1.56250   2
  -8 -12   0 57.0087 6.17209   4
  -8 -12   0 48.0266 6.19208   2
   8 -12   0 54.5650 4.90096   2
  -9 -12   0 7.57721 2.82409   4
  -9 -12   0 7.74505 3.29533   2
   9 -12   0 6.23811 1.87622   2
  10 -12   0 31.0578 3.89917   2
 -10 -12   0 20.0501 5.56875   4
   0 -13   0 29.5146 3.34814   4
   0 -13   0 27.3359 2.89431   2
  -1 -13   0 35.9755 3.66431   2
   1 -13   0 42.2728 4.05151   4
   1 -13   0 39.8762 3.48174   2
  -1 -13   0 33.1763 4.03834   4
  -2 -13   0 13.5562 2.67208   4
   2 -13   0 14.3536 2.48558   4
   2 -13   0 9.86654 1.66879   2
  -2 -13   0 10.4426 2.26348   2
   3 -13   0 19.9668 2.85112   4
  -3 -13   0 18.5034 3.02903   4
  -3 -13   0 14.7728 2.79416   2
   3 -13   0 17.6642 2.13530   2
   4 -13   0 9.34217 2.14722   4
  -4 -13   0 7.64601 2.45188   2
  -4 -13   0 13.6369 2.79220   4
   4 -13   0 8.85892 1.61515   2
  -5 -13   0 5.35514 2.08554   4
   5 -13   0 4.90217 1.34859   2
  -5 -13   0 5.45530 2.29342   2
  -6 -13   0 13.9113 3.03584   4
   6 -13   0 13.0591 2.10408   2
  -6 -13   0 11.5060 3.13739   2
  -7 -13   0 47.1479 5.29184   4
  -7 -13   0 42.9285 5.64915   2
   7 -13   0 44.4568 4.17307   2
  -8 -13   0 31.7041 5.15024   4
  -8 -13   0 42.9670 5.43867   2
   8 -13   0 34.2966 3.71156   2
   9 -13   0 52.9250 6.36099   2
  -9 -13   0 51.2152 6.70980   4
  -9 -13   0 68.3203 7.19573   2
   0 -14   0 69.9535 6.34045   4
   0 -14   0 71.2297 5.92086   2
  -1 -14   0 7.70528 2.19651   2
   1 -14   0 13.3442 2.69745   4
  -1 -14   0 7.61276 2.10880   4
   1 -14   0 7.72499 1.59081   2
  -2 -14   0 34.2522 4.35259   2
  -2 -14   0 45.0714 4.67604   4
   2 -14   0 44.1888 4.57100   4
   2 -14   0 45.7387 3.90586   2
  -3 -14   0 0.43286 1.83994   2
   3 -14   0 2.58896 1.89335   4
   3 -14   0 3.59510 1.22936   2
  -3 -14   0 3.53983 2.07641   4
  -4 -14   0 8.52639 2.58758   4
   4 -14   0 8.96326 1.63099   2
  -4 -14   0 8.33823 2.45298   2
   4 -14   0 8.60035 2.30514   4
  -5 -14   0 45.1788 5.13019   4
  -5 -14   0 38.2543 5.21983   2
   5 -14   0 46.1479 4.04315   2
  -6 -14   0 17.1585 3.77975   2
   6 -14   0 25.9969 2.94059   2
  -6 -14   0 33.1227 4.54006   4
  -7 -14   0 1.40499 2.80608   4
  -7 -14   0 -0.2623 2.83176   2
   7 -14   0 3.08304 1.43443   2
  -8 -14   0 35.7807 5.86181   2
  -8 -14   0 44.6850 5.98919   4
   8 -14   0 43.4453 4.33745   2
   0 -15   0 4.29538 1.77085   2
   0 -15   0 4.22196 2.21023   4
   1 -15   0 6.71872 1.75619   2
  -1 -15   0 6.32873 1.97570   2
  -1 -15   0 5.93676 2.58358   4
   1 -15   0 11.3321 2.72938   4
  -2 -15   0 5.42714 2.31543   2
   2 -15   0 7.54452 2.49514   4
   2 -15   0 9.99766 1.78993   2
  -2 -15   0 8.75598 2.73248   4
   3 -15   0 -0.6735 1.16059   2
   3 -15   0 1.30305 2.13527   4
  -3 -15   0 2.15027 2.12282   4
  -3 -15   0 -0.9462 1.97124   2
   4 -15   0 4.32369 1.45472   2
  -4 -15   0 4.56099 2.53489   4
   4 -15   0 5.80711 2.67033   4
  -4 -15   0 4.91956 2.52704   2
  -5 -15   0 6.63079 2.71042   2
   5 -15   0 7.03253 1.68615   2
  -5 -15   0 9.65488 2.98450   4
   6 -15   0 5.56476 1.69082   2
  -6 -15   0 9.47045 3.75584   4
  -6 -15   0 5.22972 2.98757   2
  -7 -15   0 9.57877 3.34744   4
   7 -15   0 5.69834 2.15557   2
  -7 -15   0 4.41989 3.33205   2
   0 -16   0 15.2407 2.85499   2
   0 -16   0 17.9233 3.54578   4
  -1 -16   0 0.34925 3.07427   4
   1 -16   0 3.15800 1.70604   2
  -1 -16   0 0.55327 1.82360   2
   1 -16   0 -0.1735 2.42523   4
   2 -16   0 3.55954 2.68177   4
  -2 -16   0 2.74293 2.22005   2
  -2 -16   0 3.81751 2.61089   4
   2 -16   0 2.31497 1.53085   2
  -3 -16   0 9.76327 3.30792   4
   3 -16   0 15.4844 2.29473   2
  -3 -16   0 10.9539 3.10425   2
   3 -16   0 12.6619 3.04847   4
  -4 -16   0 5.26019 2.75497   2
   4 -16   0 4.10905 1.49349   2
   4 -16   0 2.38851 3.09594   4
  -5 -16   0 19.3709 4.48288   2
  -5 -16   0 26.3652 4.52791   4
   5 -16   0 23.7009 2.94263   2
  -6 -16   0 14.8286 3.86938   4
  -6 -16   0 5.96297 3.64961   2
   6 -16   0 19.6454 3.79146   2
   0 -17   0 0.69742 2.59039   4
   0 -17   0 2.81777 2.11893   2
   1 -17   0 67.8947 5.98241   2
   1 -17   0 74.5820 7.25330   4
  -1 -17   0 60.1671 6.28516   2
  -1 -17   0 63.8776 7.77891   4
   2 -17   0 -1.0883 2.99775   4
  -2 -17   0 -1.8410 2.43527   2
   2 -17   0 1.80153 1.78098   2
   3 -17   0 1.86104 1.66183   2
  -3 -17   0 2.43630 3.44815   4
   3 -17   0 0.60488 3.72744   4
  -3 -17   0 -1.6433 3.21317   2
   4 -17   0 -0.6894 3.63464   4
  -4 -17   0 3.66999 3.18624   4
  -4 -17   0 5.47986 3.15009   2
   0 -18   0 0.94951 2.27457   2
   0 -18   0 -2.3078 4.23742   4
  -1 -18   0 31.2801 4.67206   2
  -1 -18   0 28.0999 5.75768   4
   1 -18   0 37.2818 4.19256   2
  -9   0   1 0.78111 1.30797   3
  -8   0   1 -1.4020 1.02286   3
  -7   0   1 6.23484 1.34695   3
  -6   0   1 6.23179 1.12800   3
   5   0  -1 2.75812 0.88688   3
  -5   0   1 1.67623 0.48211   3
   4   0  -1 1.07247 0.76366   2
   4   0  -1 -0.4479 0.53052   3
  -4   0   1 0.88368 0.43812   3
  -3   0   1 -0.2176 0.25681   3
   3   0  -1 -0.1851 0.50068   2
   3   0  -1 0.35345 0.43445   3
   1   0  -1 -0.1588 0.14711   2
  -1   0   1 0.16106 0.16790   2
  -1   0   1 -0.0041 0.12580   3
   1   0  -1 0.16200 0.13196   3
   1   0   1 -0.0326 0.11971   4
  -1   0  -1 0.16191 0.14320   4
   2   0   1 0.13812 0.21052   3
   3   0   1 -0.1156 0.25934   3
  -3   0  -1 -0.5786 0.29061   3
  -4   0  -1 0.86414 0.47437   3
  -5   0  -1 1.93092 0.60646   3
   6   0   1 0.66921 1.05714   3
 -10   1   1 4.80144 1.87862   3
  -9  -1   1 54.9159 4.50759   3
  -9   1   1 45.0215 4.67512   3
  -8  -1   1 47.3092 4.35483   3
  -8   1   1 52.5167 4.61739   3
  -7  -1   1 134.343 9.77071   3
  -7   1   1 127.885 9.89062   3
  -6  -1   1 140.226 11.1118   3
  -6   1   1 144.118 11.2484   3
   6   1  -1 178.889 11.5060   3
  -5  -1   1 100.663 7.52050   3
  -5   1   1 105.514 7.90245   3
  -4  -1   1 117.028 8.33221   3
   4  -1  -1 121.700 8.57949   3
  -4  -1   1 104.809 8.24813   4
   4   1  -1 126.607 8.50070   3
   4   1  -1 103.342 8.57603   2
  -4   1   1 117.850 8.44889   3
  -3  -1   1 582.000 43.5042   4
  -3  -1   1 652.542 43.5608   3
   3  -1  -1 670.748 43.7532   3
  -3  -1   1 560.328 43.7353   2
   3   1  -1 597.178 43.9085   2
   3   1  -1 534.985 43.5174   4
   3   1  -1 713.903 43.6661   3
  -3   1   1 654.466 43.6774   3
   2  -1  -1 2863.99 189.995   3
  -2  -1   1 3033.77 189.885   3
  -2  -1   1 2365.28 189.949   2
   2   1  -1 2343.96 189.933   2
   2   1  -1 2979.34 189.904   3
  -1  -1   1 643.635 49.9655   2
   1  -1  -1 729.393 50.0415   3
  -1  -1   1 767.206 49.9538   3
  -1  -1   1 646.222 49.9416   4
   1   1  -1 666.867 49.9589   2
   1   1  -1 743.408 49.9501   3
  -1   1   1 800.580 50.0475   3
   0  -1   1 180.892 13.4864   2
   0  -1  -1 204.753 13.4711   2
   0   1   1 191.491 13.5681   3
   1  -1   1 39.2730 2.59712   3
  -1  -1  -1 35.8752 2.56321   2
  -1  -1  -1 33.3683 2.52123   4
  -1  -1  -1 32.4931 2.50650   5
   1   1   1 37.7506 2.57223   2
   1   1   1 28.2155 2.49557   5
   1   1   1 33.8280 2.51073   4
   2  -1   1 154.123 10.5250   3
  -2  -1  -1 136.827 10.4497   4
   2   1   1 145.275 10.4096   3
   2   1   1 134.367 10.4291   4
   2   1   1 150.364 10.6183   2
  -2   1  -1 165.810 10.5957   3
   3  -1   1 233.325 16.3248   3
  -3  -1  -1 217.337 16.2390   4
  -3   1  -1 264.370 16.4502   3
   3   1   1 222.974 16.2022   3
   3   1   1 229.725 16.6355   2
   3   1   1 213.494 16.2068   4
   4  -1   1 37.7913 2.96996   3
  -4  -1  -1 35.2498 2.84666   4
   4   1   1 33.9548 2.79040   4
   4   1   1 37.8474 2.87206   3
  -4   1  -1 39.9499 3.07078   3
   4   1   1 38.0456 3.25540   2
  -5  -1  -1 150.666 11.9254   4
   5  -1   1 169.247 12.1343   3
   5   1   1 171.681 12.0253   3
  -5   1  -1 176.580 12.3227   3
  -6   1  -1 46.9620 3.96292   3
   6   1   1 44.6303 3.79892   3
 -10   2   1 12.6972 2.84067   3
  -9   2   1 43.6437 4.45496   3
  -8  -2   1 16.7441 2.19105   3
  -8   2   1 26.0375 2.93605   3
  -7  -2   1 128.147 9.60420   3
  -7   2   1 122.265 9.86689   3
   7   2  -1 141.014 9.98565   3
  -6  -2   1 69.0233 5.34794   3
  -6  -2   1 67.1669 5.34160   4
  -6   2   1 78.7188 5.68892   3
  -5  -2   1 145.219 11.3760   4
  -5  -2   1 156.124 11.3343   3
  -5   2   1 175.811 11.6471   3
  -4  -2   1 374.635 28.8326   4
  -4  -2   1 422.985 28.7888   3
  -4  -2   1 361.627 29.1474   2
   4  -2  -1 420.716 29.1382   3
  -4   2   1 400.118 29.0005   3
   4   2  -1 473.422 28.9674   3
  -3  -2   1 910.777 58.1237   3
  -3  -2   1 734.596 58.3588   2
  -3  -2   1 798.503 58.1754   4
  -3   2   1 907.085 58.3620   3
   3   2  -1 770.996 58.1970   4
   3   2  -1 932.564 58.1963   3
   3   2  -1 752.631 58.3406   2
  -2  -2   1 498.702 34.1161   4
   2  -2  -1 531.791 34.2792   3
  -2  -2   1 438.656 34.1929   2
  -2   2   1 521.727 34.2290   3
   2   2  -1 473.457 34.1323   4
   2   2  -1 449.534 34.1705   2
  -1  -2   1 1564.05 107.663   2
   1  -2  -1 1425.67 107.577   2
   1  -2  -1 1357.16 107.712   3
   1   2  -1 1545.69 107.683   4
  -1   2   1 1565.26 107.717   3
   1   2  -1 1781.81 107.657   2
   0  -2   1 433.738 30.1479   4
   0  -2  -1 411.749 30.1741   3
   0  -2  -1 406.399 30.1249   4
   0  -2  -1 453.720 30.0634   2
   0  -2   1 438.408 30.0921   2
   0   2   1 424.513 30.1191   4
   0   2   1 464.946 30.0656   2
   0   2  -1 452.711 30.1023   2
   0   2   1 380.389 30.1403   3
  -1  -2  -1 648.694 47.3726   4
  -1  -2  -1 693.193 47.3968   2
   1  -2   1 764.619 47.4633   3
   1  -2   1 660.573 47.3468   2
  -1   2  -1 603.109 47.3347   2
   1   2   1 646.683 47.3607   4
   1   2   1 743.243 47.3859   2
   1   2   1 651.984 47.3615   5
  -2  -2  -1 48.3985 3.70605   2
  -2  -2  -1 46.3108 3.57879   4
  -2  -2  -1 42.9905 3.58705   5
   2  -2   1 51.0219 3.65602   3
   2   2   1 44.7649 3.56323   4
  -2   2  -1 57.2805 3.78101   3
   2   2   1 49.0199 3.69866   2
   3  -2   1 973.397 68.7980   3
  -3  -2  -1 968.347 68.8076   2
  -3  -2  -1 904.999 68.5719   4
   3   2   1 1001.50 68.9666   2
  -3   2  -1 1102.73 68.8166   3
   3   2   1 926.127 68.5571   4
   4  -2   1 309.004 21.6888   3
  -4  -2  -1 270.760 21.5130   4
   4   2   1 258.835 21.5499   4
  -4   2  -1 355.920 21.8571   3
   4   2   1 329.726 21.4608   3
  -5  -2  -1 199.628 15.6005   4
   5   2   1 239.648 15.6323   3
   5   2   1 196.588 15.5523   4
  -5   2  -1 241.731 15.9852   3
  -6  -2  -1 38.4904 3.33246   4
   6   2   1 39.0371 3.29351   4
  -6   2  -1 44.8971 3.73586   3
   6   2   1 43.9198 3.48183   3
  -7  -2  -1 120.652 9.65602   4
   7   2   1 134.479 9.67570   3
  -7   2  -1 128.675 9.89646   3
 -10   3   1 25.3017 3.78470   3
  -9  -3   1 106.435 8.34282   4
  -9   3   1 112.731 8.96832   3
  -8  -3   1 52.9160 4.28692   4
  -8   3   1 51.5159 4.76298   3
   8   3  -1 48.1640 4.69162   3
  -7  -3   1 103.295 7.65926   4
  -7  -3   1 96.8682 7.51215   3
   7   3  -1 106.304 8.57964   3
  -7   3   1 103.252 8.04510   3
  -6  -3   1 200.206 15.1094   4
  -6   3   1 220.976 15.4284   3
  -5  -3   1 19.5192 2.38032   2
  -5   3   1 23.3766 2.22959   3
  -4  -3   1 91.1626 6.96551   2
  -4  -3   1 92.3167 6.68840   4
  -4   3   1 101.842 6.85240   3
   4   3  -1 76.0220 6.68337   4
  -3  -3   1 81.3375 6.75396   2
   3  -3  -1 97.8924 6.84444   3
  -3  -3   1 87.9944 6.60156   4
  -3   3   1 98.0724 6.75456   3
   3   3  -1 86.7522 6.63488   4
   3   3  -1 88.4203 6.73002   2
  -2  -3   1 41.0511 3.30527   2
  -2  -3   1 37.9817 3.16026   5
   2  -3  -1 43.6649 3.39455   3
  -2  -3   1 42.3471 3.23260   4
  -2   3   1 45.2654 3.31868   3
   2   3  -1 42.7821 3.27234   4
  -1  -3   1 618.574 39.0368   2
   1  -3  -1 562.110 38.9396   2
  -1  -3   1 612.403 39.0599   4
  -1  -3   1 594.118 38.9533   5
   1  -3  -1 495.639 39.0908   3
   1  -3  -1 531.661 38.9567   4
   1   3  -1 484.635 38.9501   5
  -1   3   1 520.190 38.9379   2
   1   3  -1 606.429 39.0972   4
  -1   3   1 556.859 38.9444   4
  -1   3   1 533.807 39.0741   3
   0  -3   1 2302.27 144.196   3
   0  -3  -1 1818.79 144.171   3
   0   3   1 1888.46 144.141   3
   0   3   1 2240.39 144.144   4
  -1  -3  -1 63.5096 5.00922   4
   1  -3   1 76.8824 5.10607   3
  -1  -3  -1 73.0322 5.02846   2
   1  -3   1 65.2516 4.95990   2
  -1  -3  -1 66.1657 4.97122   3
   1  -3   1 70.4391 4.97770   4
   1   3   1 64.7857 5.00511   4
   1   3   1 60.8046 4.91078   3
  -1   3  -1 80.9432 5.19863   3
   1   3   1 72.3727 4.99722   5
  -1   3  -1 64.6723 4.96691   2
  -2  -3  -1 227.059 16.4959   2
  -2  -3  -1 213.616 16.3971   4
  -2  -3  -1 227.131 16.3959   5
   2  -3   1 245.370 16.5352   3
   2  -3   1 215.429 16.3707   2
  -2   3  -1 261.819 16.6251   3
   2   3   1 231.820 16.4712   4
   2   3   1 230.487 16.4520   2
  -3  -3  -1 21.3276 1.88534   5
  -3  -3  -1 23.4690 1.89135   4
  -3  -3  -1 20.0807 2.00106   2
   3  -3   1 23.0771 1.96334   3
  -3   3  -1 22.2955 2.07219   3
   3   3   1 20.9833 2.04255   2
   3   3   1 21.5462 1.85041   4
  -4  -3  -1 214.875 16.6887   4
  -4  -3  -1 231.928 16.9866   2
  -4   3  -1 263.151 17.0313   3
   4   3   1 229.020 16.6786   4
  -5  -3  -1 75.7790 6.40910   4
  -5   3  -1 94.6348 6.72175   3
  -6  -3  -1 128.508 9.95422   4
  -6   3  -1 144.055 10.3965   3
  -7  -3  -1 59.3300 4.79066   4
  -7   3  -1 59.0091 5.25583   3
  -8  -3  -1 97.3442 7.53483   4
  -9  -3  -1 84.9282 6.27103   4
   9   3   1 59.3608 7.47930   3
 -13  -3  -1 -0.0807 1.37709   5
 -11  -4   1 31.8741 3.81764   4
 -10  -4   1 54.8251 4.88571   4
 -10   4   1 51.9208 5.54252   3
  -9  -4   1 16.2676 2.37682   4
  -9   4   1 15.9691 2.85403   3
  -8  -4   1 80.4521 6.05360   4
  -8   4   1 69.1114 6.44869   3
  -7  -4   1 15.8571 1.97145   4
  -7   4   1 13.9093 2.32355   3
  -6  -4   1 50.2581 4.80282   2
  -6  -4   1 55.3197 4.40153   4
  -6   4   1 55.8868 4.62029   3
  -5  -4   1 102.357 8.08141   4
  -5  -4   1 106.535 8.43831   2
  -5   4   1 117.947 8.33139   3
  -4  -4   1 424.927 31.7594   2
  -4  -4   1 430.614 31.6459   4
  -4   4   1 480.355 31.7261   3
  -3  -4   1 369.635 29.9880   5
  -3  -4   1 444.689 30.0719   4
  -3  -4   1 422.265 30.2563   2
   3   4  -1 417.270 30.0930   4
  -3   4   1 473.012 30.2319   3
  -2  -4   1 324.371 24.6953   2
  -2  -4   1 342.475 24.5725   5
  -2  -4   1 359.786 24.6703   4
   2  -4  -1 337.442 24.5476   2
   2   4  -1 355.868 24.7082   4
  -2   4   1 371.254 24.7562   3
  -1  -4   1 9.04274 0.83362   2
   1  -4  -1 7.90935 0.70669   2
  -1  -4   1 7.29814 0.89618   4
   1  -4  -1 6.44423 0.91475   3
   1  -4  -1 6.79525 0.77654   4
  -1  -4   1 6.48790 0.75491   3
  -1   4   1 7.50520 0.88925   3
  -1   4   1 7.31198 0.77930   4
  -1   4   1 8.10642 0.74603   2
   1   4  -1 8.28026 1.00597   4
   0  -4   1 130.009 8.78393   2
   0  -4  -1 128.746 8.75441   2
   0  -4   1 117.459 8.83804   3
   0  -4  -1 117.461 8.83851   4
   0  -4   1 124.995 8.85931   4
   0  -4  -1 106.622 8.88132   3
   0   4   1 126.173 8.85259   3
   0   4   1 118.946 8.82189   4
   0   4  -1 132.095 8.80979   2
   0   4   1 128.313 8.76170   2
   1  -4   1 160.335 11.3601   2
  -1  -4  -1 150.410 11.4284   4
  -1  -4  -1 174.573 11.4307   2
   1  -4   1 166.441 11.3812   4
  -1  -4  -1 144.362 11.3858   3
   1  -4   1 165.626 11.4849   3
   1   4   1 177.092 11.4108   5
  -1   4  -1 141.566 11.5377   3
   1   4   1 153.751 11.4215   4
  -1   4  -1 156.557 11.4845   2
   1   4   1 166.522 11.3289   3
  -2  -4  -1 92.1470 6.98052   2
  -2  -4  -1 107.550 6.88821   5
   2  -4   1 92.5295 6.96964   3
  -2  -4  -1 86.3909 6.89617   4
   2  -4   1 95.5613 6.85379   2
   2   4   1 80.3072 6.86102   5
  -2   4  -1 103.454 7.14083   3
   2   4   1 104.592 6.93734   2
   2   4   1 88.1290 6.88070   4
  -3  -4  -1 1110.94 78.8607   2
  -3  -4  -1 1164.43 78.6868   5
  -3  -4  -1 1105.48 78.6772   4
   3   4   1 1127.13 78.7510   2
   3   4   1 1101.38 78.6522   4
  -4  -4  -1 78.4337 5.95568   4
  -4  -4  -1 72.3156 5.92104   5
  -4  -4  -1 79.4902 6.18603   2
  -4   4  -1 84.3368 6.25685   3
  -5  -4  -1 129.412 9.68643   2
  -5  -4  -1 114.159 9.36506   5
  -5  -4  -1 128.467 9.34235   4
  -5   4  -1 134.383 9.70956   3
  -6  -4  -1 72.8648 5.73403   4
  -6  -4  -1 68.9764 5.79964   5
  -6   4  -1 78.8852 6.15501   3
  -7  -4  -1 24.4228 2.47826   4
  -7   4  -1 19.8511 2.89057   3
  -8  -4  -1 166.726 12.4072   4
  -9  -4  -1 26.8232 3.15211   4
 -10  -4  -1 18.7780 2.77391   4
 -11  -4  -1 15.2135 2.66413   5
 -11  -4  -1 22.1682 3.11790   4
 -12  -4  -1 2.47104 1.39290   5
 -13  -4  -1 59.6728 5.77965   5
 -13  -5   1 4.65500 1.82350   5
 -12  -5   1 9.20784 3.47956   4
 -12  -5   1 8.88702 2.18191   5
 -11  -5   1 2.00694 1.88276   4
 -11  -5   1 1.94725 1.16925   5
 -10  -5   1 8.37350 2.07873   4
 -10   5   1 4.30871 2.23179   3
  -9  -5   1 69.3800 5.51668   4
  -9   5   1 55.0368 5.78367   3
  -8  -5   1 77.8024 6.14498   4
  -8   5   1 71.5981 6.61038   3
  -7  -5   1 7.81260 1.45816   4
  -7   5   1 3.54361 1.38909   3
  -6  -5   1 84.4048 7.07790   2
  -6  -5   1 90.7629 6.67040   4
  -6   5   1 81.3538 6.86058   3
  -5  -5   1 81.0769 6.88481   2
  -5  -5   1 76.4205 6.56639   5
  -5  -5   1 91.4441 6.64046   4
  -5   5   1 95.7632 6.84800   3
  -4  -5   1 540.932 38.7651   2
  -4  -5   1 575.931 38.5457   4
  -4  -5   1 478.670 38.4421   5
   4  -5  -1 525.603 38.4157   2
  -4   5   1 604.179 38.7733   3
  -3  -5   1 259.447 19.6448   2
  -3  -5   1 279.392 19.5369   4
  -3  -5   1 256.024 19.4173   5
  -3   5   1 298.587 19.6744   3
  -2  -5   1 70.5301 5.48778   2
   2  -5  -1 63.4431 5.08654   4
  -2  -5   1 72.1419 5.37872   4
   2  -5  -1 71.9161 5.53367   3
   2  -5  -1 68.5598 5.10126   2
  -2  -5   1 70.4425 5.10944   5
  -2   5   1 69.8181 5.09521   4
  -2   5   1 70.2642 5.75222   3
   1  -5  -1 137.732 9.93525   4
  -1  -5   1 153.138 9.97999   2
  -1  -5   1 122.558 9.86551   3
   1  -5  -1 137.041 9.85382   2
  -1  -5   1 142.919 10.0284   4
   1   5  -1 137.718 10.0883   4
   1   5  -1 129.600 9.88812   5
  -1   5   1 147.895 10.0677   3
   0  -5  -1 172.616 11.4148   2
   0  -5   1 164.498 11.5298   4
   0  -5   1 148.491 11.4836   3
   0  -5  -1 155.829 11.5111   4
   0  -5   1 165.227 11.4317   2
   0  -5  -1 135.803 11.5499   3
   0   5  -1 162.458 11.6093   4
   0   5   1 158.256 11.5004   4
   0   5   1 168.283 11.5253   3
   0   5  -1 173.213 11.4743   2
   1  -5   1 19.8099 1.89365   3
  -1  -5  -1 23.8772 1.86623   2
   1  -5   1 22.3505 1.75412   2
  -1  -5  -1 18.4777 1.86931   3
  -1  -5  -1 19.8958 1.88639   4
   1  -5   1 20.3065 1.83984   4
  -1   5  -1 20.6633 1.79093   2
   1   5   1 20.7103 1.90036   4
   1   5   1 24.0361 1.83333   5
   1   5   1 25.6661 1.78156   2
  -1   5  -1 21.6248 2.09772   3
   2  -5   1 164.156 11.4981   3
  -2  -5  -1 144.436 11.1746   4
  -2  -5  -1 149.501 11.1193   2
   2  -5   1 157.761 10.9249   4
  -2   5  -1 163.421 11.5267   3
   2   5   1 140.861 11.0205   5
  -3  -5  -1 54.1257 4.54252   4
  -3  -5  -1 64.4929 4.64757   5
   3  -5   1 59.7573 4.47311   2
  -3  -5  -1 54.0088 4.68299   2
  -3   5  -1 60.9079 4.81278   3
   4  -5   1 24.7824 2.26465   2
  -4  -5  -1 26.7486 2.40919   4
  -4  -5  -1 25.6790 2.65353   2
  -4  -5  -1 26.2377 2.32618   5
  -4   5  -1 25.6886 2.70881   3
  -5  -5  -1 67.4704 5.69493   2
  -5  -5  -1 64.7569 5.37148   5
  -5  -5  -1 67.5273 5.39978   4
  -5   5  -1 75.0802 5.76127   3
  -6  -5  -1 12.4096 1.74160   5
  -6  -5  -1 15.5026 1.87248   4
  -6   5  -1 13.5484 2.19453   3
  -7  -5  -1 167.594 12.8365   5
  -7  -5  -1 179.282 12.7848   4
  -7   5  -1 167.929 13.2091   3
  -8  -5  -1 59.5787 5.51499   5
  -8  -5  -1 70.2570 5.57366   4
  -9  -5  -1 4.69509 1.72370   4
  -9  -5  -1 2.43741 1.09132   5
 -10  -5  -1 32.8480 3.81352   4
 -10  -5  -1 30.0235 3.45752   5
 -11  -5  -1 13.8681 2.77235   4
 -11  -5  -1 6.75324 1.92206   5
 -12  -5  -1 2.92836 1.66037   5
 -12  -5  -1 7.88174 2.80270   4
 -13  -5  -1 6.38682 2.11152   5
 -13  -6   1 3.92982 1.83315   5
 -12  -6   1 0.29659 2.57349   4
 -12  -6   1 0.32266 1.43016   5
 -11  -6   1 39.2265 4.31483   5
 -11  -6   1 47.0466 4.81248   4
 -10  -6   1 17.1566 2.71023   5
 -10  -6   1 20.3456 3.22695   4
 -10   6   1 17.4653 3.34816   3
  -9  -6   1 19.4870 2.59445   5
  -9  -6   1 25.0196 2.99324   4
  -9   6   1 16.1019 3.16004   3
  -8  -6   1 23.2335 2.80357   5
  -8  -6   1 33.0319 3.08040   4
  -8   6   1 22.8614 3.38332   3
  -7  -6   1 92.5757 6.57987   4
  -7  -6   1 77.9158 6.97674   2
  -7  -6   1 76.3745 6.43118   5
  -7   6   1 72.7248 6.75969   3
  -6  -6   1 95.3049 6.78181   4
  -6  -6   1 85.4194 6.71172   5
  -6  -6   1 75.9107 7.06935   2
  -6   6   1 83.5515 7.01075   3
  -5  -6   1 206.784 16.3087   2
   5  -6  -1 212.409 15.9009   2
  -5  -6   1 205.802 15.9532   5
  -5  -6   1 232.364 16.0537   4
  -5   6   1 245.384 16.3331   3
  -4  -6   1 286.827 21.7421   2
  -4  -6   1 290.922 21.4325   5
  -4  -6   1 313.455 21.5632   4
   4  -6  -1 288.781 21.3864   2
  -4   6   1 322.157 21.7465   3
  -3  -6   1 28.2659 2.60474   2
   3  -6  -1 25.3471 2.24324   2
  -3   6   1 27.5349 2.61612   3
  -2  -6   1 49.0464 3.64432   2
  -2  -6   1 40.1806 3.31261   3
  -2  -6   1 48.8378 3.62830   4
   2  -6  -1 44.0399 3.43874   4
  -2   6   1 45.1679 3.44514   4
   2   6  -1 39.9909 3.44672   5
  -2   6   1 41.6310 3.52306   2
  -2   6   1 48.1229 3.71323   3
  -1  -6   1 8.90827 1.15340   4
  -1  -6   1 8.13384 0.98787   3
   1  -6  -1 6.06682 1.17346   3
   1  -6  -1 9.25022 0.91449   2
   1  -6  -1 9.42066 1.09659   4
  -1  -6   1 9.20720 1.04954   2
   1   6  -1 8.89993 0.93929   5
  -1   6   1 7.94247 1.14927   3
  -1   6   1 8.55430 0.94624   2
  -1   6   1 10.3226 1.11925   4
   0  -6   1 289.790 19.3534   2
   0  -6  -1 287.995 19.3256   2
   0  -6  -1 260.543 19.4366   4
   0  -6   1 275.515 19.4481   4
   0   6  -1 228.254 19.8748   4
   0   6   1 257.496 19.5792   4
   0   6   1 277.914 19.3367   2
   0   6   1 302.408 19.5044   3
  -1  -6  -1 101.273 8.97614   3
   1  -6   1 121.034 8.94140   4
   1  -6   1 117.191 8.86363   2
  -1  -6  -1 115.276 9.00857   4
  -1  -6  -1 143.136 9.12997   2
   1   6   1 131.108 8.95698   3
   1   6   1 135.698 8.88726   2
  -1   6  -1 121.717 9.06278   4
   1   6   1 124.591 8.93051   5
   2  -6   1 43.4858 3.53577   2
  -2  -6  -1 48.3823 3.77023   2
   2  -6   1 43.9764 3.52970   4
  -2  -6  -1 45.0639 3.70934   4
  -2   6  -1 51.7973 4.02372   3
  -3  -6  -1 96.8446 7.83381   2
   3  -6   1 101.724 7.60648   2
  -3  -6  -1 97.7501 7.73158   4
  -3  -6  -1 115.830 7.64703   5
  -4  -6  -1 147.612 9.93691   5
   4  -6   1 130.111 9.87479   2
  -4  -6  -1 125.928 10.1855   2
  -4  -6  -1 128.934 9.98873   4
  -4   6  -1 140.990 10.3608   3
  -5  -6  -1 42.2630 3.59532   5
  -5  -6  -1 39.0218 3.97756   2
  -5  -6  -1 44.9989 3.74365   4
   5  -6   1 40.5412 3.55159   2
  -5   6  -1 46.8443 4.17747   3
  -6  -6  -1 109.882 8.05538   4
  -6  -6  -1 110.453 8.44959   2
   6  -6   1 101.659 7.91663   2
  -6  -6  -1 102.163 7.98195   5
  -6   6  -1 95.6940 8.41313   3
  -7  -6  -1 88.4948 6.93022   5
  -7  -6  -1 92.6587 7.01697   4
  -7   6  -1 76.4847 7.31264   3
  -8  -6  -1 19.7429 3.40543   5
  -8  -6  -1 30.3515 3.13855   4
  -9  -6  -1 30.3346 3.39357   5
  -9  -6  -1 35.6305 3.85213   4
 -10  -6  -1 14.5808 3.31506   4
 -10  -6  -1 9.78769 2.12515   5
 -11  -6  -1 3.65181 2.33623   4
 -11  -6  -1 4.27543 1.64549   5
 -12  -6  -1 21.6125 3.91153   4
 -12  -6  -1 22.7860 3.48635   5
 -13  -6  -1 9.63612 3.74070   4
 -13  -6  -1 9.57097 2.40928   5
 -13  -7   1 29.5557 4.96350   4
 -13  -7   1 27.5587 4.15099   5
 -12  -7   1 1.39560 2.76459   4
 -12  -7   1 3.08458 1.87290   5
 -11  -7   1 29.5834 4.12374   4
 -11  -7   1 19.9629 3.29668   5
 -10  -7   1 7.00842 1.80422   5
 -10  -7   1 8.55430 2.47239   4
 -10   7   1 9.20811 2.71237   3
  -9  -7   1 31.5108 3.31540   5
  -9   7   1 29.5591 4.00163   3
   8  -7  -1 15.8747 2.38464   2
  -8  -7   1 19.7955 2.83379   4
  -8   7   1 16.4493 2.83397   3
  -7  -7   1 18.0933 2.43957   4
  -7  -7   1 10.1840 3.00561   2
  -7  -7   1 12.6216 2.00812   5
   7  -7  -1 16.3858 1.90385   2
  -7   7   1 12.2352 2.86884   3
  -6  -7   1 283.271 21.7314   5
  -6  -7   1 323.304 21.8908   4
   6  -7  -1 304.570 21.6941   2
  -6  -7   1 296.152 22.2553   2
  -6   7   1 300.297 22.1977   3
   5  -7  -1 20.6408 1.95950   2
  -5  -7   1 18.1676 2.16729   4
  -5  -7   1 16.3998 1.88091   5
  -5  -7   1 22.4056 2.73990   2
  -5   7   1 16.6710 2.30645   3
  -4  -7   1 171.593 11.3122   2
  -4  -7   1 139.592 10.8942   4
   4  -7  -1 147.351 10.7285   2
  -4  -7   1 128.847 10.6860   5
  -4   7   1 154.956 11.1626   3
  -3  -7   1 163.758 12.1102   4
   3  -7  -1 165.905 11.8877   2
   2  -7  -1 138.435 10.9261   4
  -2  -7   1 157.615 11.1298   4
  -2  -7   1 171.879 11.1870   2
   2  -7  -1 141.419 10.8575   2
  -2   7   1 151.164 11.2103   3
  -1  -7   1 106.938 7.55863   2
   1  -7  -1 99.5127 7.40039   2
  -1  -7   1 100.434 7.63594   4
   1   7  -1 97.0134 7.45805   5
  -1   7   1 107.726 7.73460   3
   0  -7  -1 209.261 15.4264   4
   0  -7   1 192.742 15.3878   3
   0  -7   1 224.211 15.3086   2
   0  -7   1 213.803 15.4235   4
   0  -7  -1 232.629 15.2947   2
   0   7   1 214.326 15.4724   3
  -1  -7  -1 113.804 8.50212   4
  -1  -7  -1 121.339 8.41194   2
   1  -7   1 115.246 8.30194   2
   1   7   1 107.204 8.41711   3
  -2  -7  -1 19.5117 1.68059   3
   2  -7   1 10.2227 1.45869   4
  -2  -7  -1 17.6030 1.76831   2
   2  -7   1 14.4241 1.41230   2
  -2   7  -1 10.3603 1.92237   3
   3  -7   1 41.5604 3.43612   4
  -3  -7  -1 43.0173 3.89203   2
   3  -7   1 43.9982 3.52226   2
  -3   7  -1 49.2134 4.22075   3
  -4  -7  -1 110.517 8.10575   4
  -4  -7  -1 119.540 7.93616   5
  -4  -7  -1 92.6449 8.22335   2
   4  -7   1 98.5847 7.85954   2
  -4   7  -1 105.303 8.44977   3
  -5  -7  -1 2.91062 1.03856   4
  -5  -7  -1 1.62824 1.51993   2
   5  -7   1 1.75407 0.78322   2
  -5   7  -1 -0.0063 1.29277   3
  -6  -7  -1 41.4271 3.71633   4
   6  -7   1 39.7396 3.45468   2
  -6  -7  -1 34.7391 4.03911   2
  -6  -7  -1 43.7618 3.52513   5
  -6   7  -1 28.9693 3.94940   3
  -7  -7  -1 151.190 11.2652   4
   7  -7   1 137.652 11.0261   2
  -7  -7  -1 151.527 11.6870   2
  -7  -7  -1 148.169 11.1138   5
  -8  -7  -1 41.2286 4.01685   4
   8  -7   1 29.6394 3.40880   2
  -8  -7  -1 36.2686 3.52511   5
  -9  -7  -1 39.8074 4.06553   5
   9  -7   1 43.1000 4.13597   2
  -9  -7  -1 47.6336 6.07664   4
 -10  -7  -1 5.11897 1.51109   5
 -10  -7  -1 3.46212 2.26407   4
  10  -7   1 2.57625 1.36978   2
 -11  -7  -1 11.1827 2.23181   5
  11  -7   1 9.18375 2.06124   2
 -11  -7  -1 12.1661 3.17672   4
 -12  -7  -1 21.3233 4.23969   4
 -13  -7  -1 5.54623 3.87995   4
 -13  -7  -1 3.59989 1.80506   5
 -12  -8   1 107.051 9.07281   4
 -12  -8   1 89.0954 8.24417   5
  12  -8  -1 95.2195 8.37532   2
  11  -8  -1 8.53693 2.01953   2
 -11  -8   1 14.8692 3.13142   4
 -11  -8   1 5.52655 1.70848   5
 -10  -8   1 18.8533 3.23785   4
  10  -8  -1 16.8117 2.67342   2
  -9  -8   1 41.3766 4.19977   5
  -9  -8   1 42.3948 4.54636   4
   9  -8  -1 47.7782 4.20937   2
  -8  -8   1 56.0381 5.00697   4
  -8  -8   1 46.3764 5.33799   2
  -8  -8   1 49.4236 4.54997   5
   8  -8  -1 52.7130 4.49591   2
  -8   8   1 45.5858 5.10841   3
  -7  -8   1 42.1596 4.86719   2
  -7  -8   1 48.4643 4.18758   5
  -7  -8   1 59.0437 4.62813   4
   7  -8  -1 43.6310 4.09002   2
  -7   8   1 41.8826 4.70881   3
  -6  -8   1 16.4948 2.86504   2
   6  -8  -1 15.3426 1.87314   2
  -6   8   1 11.2745 2.46053   3
  -5  -8   1 114.018 8.22796   5
   5  -8  -1 102.192 8.17681   2
  -5  -8   1 103.434 8.78000   2
  -5  -8   1 112.906 8.46000   4
  -5   8   1 113.345 8.82658   3
  -4  -8   1 57.0636 4.48536   4
   4  -8  -1 43.5411 4.04687   2
  -4  -8   1 63.2021 4.21680   5
  -4  -8   1 50.3202 4.64290   2
  -4   8   1 46.0100 4.66676   3
  -3  -8   1 131.119 10.2204   2
   3  -8  -1 136.052 9.84252   2
  -3  -8   1 135.676 10.1033   4
   3  -8  -1 123.886 9.87147   4
  -3   8   1 152.049 10.4158   3
   2  -8  -1 59.0354 4.61416   2
   2  -8  -1 57.4312 4.75328   4
  -2  -8   1 57.4183 4.94772   3
  -2  -8   1 63.6162 4.93866   2
  -2  -8   1 60.1705 4.89459   4
  -2   8   1 72.6068 5.19362   3
  -1  -8   1 22.3680 2.09319   2
   1  -8  -1 20.5037 2.11939   4
   1  -8  -1 23.7672 1.91174   2
  -1  -8   1 20.8624 2.20375   4
  -1   8   1 21.8171 2.30990   3
   0  -8  -1 137.767 9.36449   2
   0  -8  -1 119.646 9.50237   4
   0  -8   1 126.655 9.51134   4
   0  -8   1 132.083 9.38231   2
   0   8   1 127.548 9.63277   3
   1  -8   1 131.091 9.09537   2
  -1  -8  -1 132.107 9.20580   2
  -1  -8  -1 124.915 9.31108   4
   1  -8   1 128.143 9.21227   4
   1   8   1 108.303 9.22600   3
   2  -8   1 75.7058 5.67198   2
  -2  -8  -1 77.9612 5.93621   4
  -2  -8  -1 74.8810 5.91601   2
  -2  -8  -1 69.4141 5.79815   3
   2  -8   1 79.0070 5.73683   4
  -3  -8  -1 100.101 7.18609   4
   3  -8   1 94.0484 6.90405   2
   3  -8   1 77.9187 6.88791   4
  -3  -8  -1 93.5843 7.26766   2
  -3   8  -1 98.4062 7.54559   3
  -4  -8  -1 101.965 8.01116   4
   4  -8   1 104.448 7.77787   2
  -4  -8  -1 102.535 8.20483   2
  -4   8  -1 105.071 8.44474   3
   5  -8   1 61.7007 4.96773   2
  -5  -8  -1 53.7996 5.46189   2
  -5  -8  -1 62.0339 5.22033   4
  -5  -8  -1 67.8772 4.97129   5
  -5   8  -1 59.2954 5.61497   3
   6  -8   1 1.78859 0.88116   2
  -6  -8  -1 -1.1480 1.44530   2
  -6  -8  -1 0.46419 0.70788   5
  -6  -8  -1 2.47491 1.32031   4
  -7  -8  -1 50.5576 4.14337   5
  -7  -8  -1 39.1504 4.82731   2
   7  -8   1 44.8188 4.53372   2
  -7  -8  -1 45.7437 4.47901   4
  -8  -8  -1 81.0045 6.79805   4
   8  -8   1 70.5917 6.29099   2
  -8  -8  -1 79.7742 6.37874   5
  -9  -8  -1 5.83208 1.63291   5
   9  -8   1 7.29059 1.75606   2
  -9  -8  -1 6.19305 2.31378   4
 -10  -8  -1 6.26523 2.58309   4
 -10  -8  -1 2.71724 1.22861   5
  10  -8   1 1.30567 1.18136   2
 -11  -8  -1 72.4362 7.26423   4
 -11  -8  -1 70.0346 6.41463   5
  11  -8   1 75.0867 6.42988   2
  12  -8   1 8.97309 2.27983   2
 -12  -8  -1 7.87317 3.43108   4
 -12  -8  -1 8.34612 2.13423   5
  12  -9  -1 4.85152 1.95991   2
 -12  -9   1 4.65214 3.38702   4
 -12  -9   1 6.04120 1.92170   5
 -11  -9   1 47.8673 4.65256   5
 -11  -9   1 43.6100 5.71691   4
  11  -9  -1 43.9997 4.60803   2
 -10  -9   1 10.0001 2.07481   5
 -10  -9   1 12.3846 2.83653   4
  10  -9  -1 10.0620 2.17181   2
   9  -9  -1 24.7424 2.90566   2
  -9  -9   1 31.3746 3.80092   4
  -9  -9   1 24.4732 2.93580   5
  -9   9   1 14.6396 3.42730   3
  -8  -9   1 19.4568 2.46318   5
  -8  -9   1 23.4894 3.16274   4
  -8  -9   1 18.7222 3.41597   2
   8  -9  -1 21.3425 2.51251   2
  -8   9   1 16.6226 3.06161   3
  -7  -9   1 17.7968 2.71420   4
   7  -9  -1 17.3954 2.11025   2
  -7  -9   1 11.0709 2.64204   2
  -7  -9   1 12.7297 2.23556   5
  -7   9   1 22.4197 3.20711   3
  -6  -9   1 126.665 9.01103   4
  -6  -9   1 98.4426 9.09115   2
  -6  -9   1 118.001 8.39181   5
   6  -9  -1 111.531 8.34173   2
  -6   9   1 89.9552 8.94083   3
  -5  -9   1 18.7674 2.13255   5
  -5  -9   1 18.1939 3.14933   2
   5  -9  -1 22.1360 2.20656   2
  -5  -9   1 25.5199 2.66261   4
  -5   9   1 22.6836 3.12748   3
  -4  -9   1 151.311 12.1454   2
  -4  -9   1 154.714 11.9080   4
   4  -9  -1 156.159 11.6166   2
  -4   9   1 176.078 12.3836   3
   3  -9  -1 39.1052 3.64794   4
  -3  -9   1 50.4574 3.95382   4
   3  -9  -1 39.3583 3.46795   2
  -3  -9   1 49.1970 4.10902   2
  -3   9   1 44.7500 4.16584   3
   2  -9  -1 6.87563 1.21177   4
  -2  -9   1 6.26179 1.26074   4
  -1  -9   1 212.896 15.7709   4
  -1  -9   1 232.566 15.7215   2
   1  -9  -1 217.294 15.5165   2
   1  -9  -1 208.319 15.7114   4
  -1   9   1 214.680 15.9733   3
   0  -9  -1 86.6078 5.90423   2
   0  -9   1 82.9391 5.91154   2
   0  -9   1 76.6470 6.01939   4
   0  -9  -1 75.3472 6.04018   4
   0   9   1 66.0921 6.13511   3
  -1  -9  -1 203.197 14.1555   2
   1  -9   1 196.021 14.1506   4
   1  -9   1 194.723 14.0116   2
  -1  -9  -1 185.681 14.2407   4
  -2  -9  -1 16.4836 2.34701   3
  -2  -9  -1 24.8523 2.36587   4
   2  -9   1 20.3603 1.92543   2
  -2  -9  -1 17.6305 2.17063   2
   2  -9   1 20.3879 2.05275   4
   3  -9   1 150.949 11.0777   4
  -3  -9  -1 151.097 11.4018   4
  -3  -9  -1 141.148 11.4343   2
   3  -9   1 163.248 11.1360   2
   4  -9   1 554.746 39.3145   2
  -4  -9  -1 578.487 39.6372   4
  -4  -9  -1 531.778 39.7256   2
  -5  -9  -1 121.209 10.4179   2
  -5  -9  -1 140.154 10.2958   4
   5  -9   1 136.525 9.96980   2
  -6  -9  -1 41.4905 4.33556   4
  -6  -9  -1 36.3195 4.84099   2
   6  -9   1 38.8857 3.64045   2
  -6  -9  -1 43.5093 3.64827   5
   7  -9   1 150.275 11.7832   2
  -7  -9  -1 170.823 11.8634   5
  -7  -9  -1 144.416 12.4585   2
  -7  -9  -1 160.406 12.2132   4
   8  -9   1 49.7386 4.48240   2
  -8  -9  -1 51.2068 4.49202   5
  -8  -9  -1 51.1706 5.09527   4
  -8  -9  -1 44.7902 5.42495   2
  -9  -9  -1 18.9403 3.33026   4
   9  -9   1 12.1055 2.12433   2
  -9  -9  -1 11.6795 2.12212   5
  10  -9   1 106.030 8.75903   2
 -10  -9  -1 105.737 8.74671   5
 -10  -9  -1 113.806 9.65400   4
  11  -9   1 64.1263 5.78659   2
 -11  -9  -1 61.4680 5.65595   5
 -11  -9  -1 56.3540 6.66227   4
  12  -9   1 35.3418 4.13367   2
 -12  -9  -1 33.1261 4.00301   5
 -12  -9  -1 28.2765 5.36147   4
 -11 -10   1 34.0180 5.20592   4
 -11 -10   1 37.1870 4.62522   5
  11 -10  -1 39.4580 6.00359   2
 -10 -10   1 0.94447 2.30214   4
 -10 -10   1 0.67899 1.11064   5
  10 -10  -1 -0.5914 1.30362   2
   9 -10  -1 12.1492 2.19277   2
  -9 -10   1 12.7566 2.96777   4
  -9 -10   1 10.2007 3.15793   2
  -9 -10   1 14.0766 2.26884   5
   8 -10  -1 0.53735 1.17617   2
  -8 -10   1 0.93984 0.93642   5
  -8 -10   1 0.56008 2.20771   2
  -8 -10   1 2.87666 1.95419   4
  -8  10   1 -3.7383 1.96014   3
  -7 -10   1 69.1073 6.29593   4
   7 -10  -1 73.6163 5.86055   2
  -7 -10   1 72.9402 6.95270   2
  -7 -10   1 81.3451 5.91161   5
  -7  10   1 58.3958 6.60143   3
  -6 -10   1 3.59864 2.06004   2
  -6 -10   1 7.36463 1.78766   4
  -6  10   1 11.7132 2.60669   3
  -5 -10   1 430.075 32.6870   2
   5 -10  -1 443.118 31.5556   2
  -5 -10   1 471.055 32.9123   4
  -5  10   1 430.793 32.2990   3
   4 -10  -1 11.3498 1.55766   2
  -4  10   1 14.5312 2.45157   3
   3 -10  -1 6.44440 1.43101   4
  -3 -10   1 11.1104 2.03471   2
   3 -10  -1 7.46846 1.20797   2
  -3  10   1 11.8475 2.36035   3
   2 -10  -1 440.614 31.4141   4
  -2 -10   1 437.946 31.5312   4
   2 -10  -1 435.918 31.1927   2
  -2 -10   1 437.659 31.5301   2
  -2  10   1 453.979 31.8602   3
   1 -10  -1 187.977 13.4939   4
  -1 -10   1 183.844 13.4199   2
   1 -10  -1 186.440 13.2322   2
  -1 -10   1 178.308 13.4996   4
  -1  10   1 179.918 13.7481   3
   0 -10  -1 1.87667 0.80154   2
   0 -10   1 2.10847 0.88423   2
   0 -10   1 2.48849 0.90254   4
   0 -10  -1 3.18880 1.05798   4
   0  10   1 3.29819 1.64152   3
   1 -10   1 29.8357 2.80407   4
   1 -10   1 28.0875 2.56583   2
  -1 -10  -1 32.2024 2.99872   4
  -1 -10  -1 27.0166 2.78561   2
   2 -10   1 129.742 9.35298   2
   2 -10   1 123.971 9.46807   4
  -2 -10  -1 119.824 9.62981   2
  -2 -10  -1 134.685 9.75471   4
  -3 -10  -1 93.7705 7.13428   4
   3 -10   1 84.9684 6.71629   4
  -3 -10  -1 84.7250 7.11444   2
   3 -10   1 87.7445 6.66088   2
   4 -10   1 92.9555 7.32334   2
  -4 -10  -1 91.7805 7.89149   2
  -4 -10  -1 104.870 7.84293   4
  -5 -10  -1 28.1648 3.57648   4
  -5 -10  -1 20.9526 3.31775   2
   5 -10   1 22.9178 2.42532   2
  -6 -10  -1 4.42835 1.96343   2
   6 -10   1 3.48125 1.11755   2
  -7 -10  -1 106.218 8.52831   4
  -7 -10  -1 111.639 7.98012   5
   7 -10   1 93.3783 7.87365   2
  -7 -10  -1 91.4735 8.60253   2
  -8 -10  -1 3.64075 1.13089   5
   8 -10   1 3.85324 1.42187   2
  -8 -10  -1 2.30650 2.38935   2
  -8 -10  -1 3.54767 2.15776   4
  -9 -10  -1 42.9391 5.14768   4
   9 -10   1 33.2677 3.79093   2
  -9 -10  -1 38.8970 3.78297   5
  10 -10   1 -0.3571 1.28675   2
 -10 -10  -1 0.07415 2.83202   4
 -10 -10  -1 0.49880 1.13799   5
 -11 -10  -1 114.418 9.19548   5
 -11 -10  -1 96.3965 9.78632   4
  11 -10   1 98.8980 8.60874   2
 -11 -11   1 18.3310 3.00010   5
 -11 -11   1 16.1115 4.80013   4
  11 -11  -1 15.5278 2.83611   2
 -10 -11   1 5.31978 2.82249   4
 -10 -11   1 6.42985 1.73028   5
  10 -11  -1 8.64066 2.01272   2
   9 -11  -1 31.6336 3.45763   2
  -9 -11   1 31.7373 3.38767   5
  -9 -11   1 36.7675 4.57018   4
  -9 -11   1 23.4121 4.37310   2
  -8 -11   1 18.0978 3.04818   4
   8 -11  -1 13.6107 2.26061   2
  -8 -11   1 6.76781 2.93831   2
  -8 -11   1 16.2659 2.11963   5
   7 -11  -1 6.81808 1.58646   2
  -7 -11   1 4.54356 2.37196   2
  -7  11   1 4.56203 2.30912   3
  -6 -11   1 11.7048 3.05040   2
   6 -11  -1 15.8575 2.18024   2
  -6 -11   1 21.9944 2.80390   4
  -6  11   1 24.2307 3.60494   3
   5 -11  -1 6.94607 1.95620   2
  -5 -11   1 7.99672 2.27718   2
  -5 -11   1 8.45147 1.96885   4
  -5  11   1 16.3918 2.85079   3
   4 -11  -1 22.1106 2.29046   2
  -4 -11   1 23.6429 2.96294   4
  -4 -11   1 24.6931 3.24537   2
  -4  11   1 23.7052 3.27956   3
  -3 -11   1 8.21078 2.24846   4
   3 -11  -1 10.4259 1.36187   2
  -3 -11   1 8.48432 2.07270   2
   3 -11  -1 6.56946 1.67901   4
  -3  11   1 6.45462 2.04104   3
   2 -11  -1 8.17303 1.74986   4
   2 -11  -1 11.0590 1.39950   2
  -2 -11   1 6.48936 1.60485   2
  -2  11   1 12.3275 2.50477   3
  -1 -11   1 333.465 23.3152   2
  -1 -11   1 333.830 23.4319   4
   1 -11  -1 338.814 23.1113   2
   1 -11  -1 312.428 23.3526   4
  -1  11   1 300.288 23.6502   3
   0 -11  -1 158.983 11.9399   2
   0 -11  -1 172.287 12.2591   4
   0 -11   1 158.633 11.9455   2
  -1 -11  -1 87.4139 6.30143   4
   1 -11   1 71.8286 6.02148   4
   1 -11   1 76.2146 5.79123   2
  -1 -11  -1 65.9336 5.95150   2
  -2 -11  -1 11.5587 2.04789   4
   2 -11   1 8.75339 1.66597   4
  -2 -11  -1 7.37615 1.84835   2
   2 -11   1 8.19843 1.32998   2
  -3 -11  -1 16.6546 3.06480   4
  -3 -11  -1 12.7199 2.39099   2
   3 -11   1 15.2263 2.15789   4
   3 -11   1 17.6339 1.86584   2
   4 -11   1 58.5781 5.56513   2
  -4 -11  -1 63.1702 5.91160   2
  -4 -11  -1 71.7149 5.87461   4
  -5 -11  -1 27.2757 3.08657   4
  -5 -11  -1 16.3986 3.09406   2
   5 -11   1 19.3323 2.25808   2
  -6 -11  -1 8.66539 2.17262   4
   6 -11   1 5.13809 1.39266   2
  -6 -11  -1 4.77589 2.57618   2
   7 -11   1 14.2990 2.32128   2
  -7 -11  -1 19.9568 3.31374   4
  -7 -11  -1 11.5964 3.18555   2
   8 -11   1 7.27772 1.64885   2
  -8 -11  -1 8.19174 2.94873   2
  -8 -11  -1 4.55695 2.41111   4
   9 -11   1 32.3004 3.59641   2
  -9 -11  -1 36.5428 5.33220   4
 -10 -11  -1 19.1585 2.85377   5
 -10 -11  -1 13.5967 3.96325   4
  10 -11   1 16.9424 2.77925   2
 -11 -11  -1 31.7676 3.79433   5
  11 -11   1 32.1450 3.94030   2
 -11 -11  -1 24.2092 6.27278   4
 -10 -12   1 5.61117 3.66233   4
   9 -12  -1 14.1945 2.35227   2
  -9 -12   1 9.00577 2.92923   4
  -9 -12   1 15.6770 4.04136   2
  -8 -12   1 23.3532 3.73267   4
   8 -12  -1 19.9146 2.69510   2
  -8 -12   1 17.7446 3.38703   2
  -7 -12   1 7.36078 2.35754   4
   7 -12  -1 4.96262 1.47274   2
  -7 -12   1 6.84623 2.70662   2
  -6 -12   1 4.16734 2.35698   2
  -6 -12   1 3.80753 1.80899   4
   6 -12  -1 2.46069 1.16459   2
  -6  12   1 1.88708 2.20862   3
  -5 -12   1 18.3631 3.39243   2
  -5 -12   1 24.6233 3.16067   4
   5 -12  -1 22.7498 2.35141   2
  -5  12   1 16.5105 3.50385   3
  -4 -12   1 26.3581 3.52198   2
  -4 -12   1 26.2597 3.23773   4
   4 -12  -1 28.7367 2.62118   2
   4 -12  -1 22.9520 3.05886   4
  -4  12   1 23.4603 3.52610   3
  -3 -12   1 14.6323 2.53077   4
  -3 -12   1 12.2131 2.19736   2
   3 -12  -1 11.3118 2.11206   4
   3 -12  -1 9.42033 1.53464   2
  -3  12   1 10.0453 2.56578   3
  -2 -12   1 33.8873 3.53263   2
   2 -12  -1 33.5877 3.39285   4
   2 -12  -1 34.1435 2.96029   2
  -2 -12   1 27.9871 3.47145   4
   1 -12  -1 74.0580 6.15412   4
  -1 -12   1 68.4158 6.20612   4
   1 -12  -1 77.7270 5.81276   2
  -1 -12   1 75.9694 6.92272   2
   0 -12  -1 23.9780 2.59451   2
   0 -12  -1 29.7776 3.11489   4
   0 -12   1 24.1224 2.62512   2
   0 -12   1 23.6662 2.87745   4
  -1 -12  -1 72.8933 6.14345   4
  -1 -12  -1 62.6267 5.65987   2
   1 -12   1 69.9265 5.71299   2
   1 -12   1 72.9817 5.81055   4
  -2 -12  -1 10.1870 2.10408   4
   2 -12   1 10.4832 1.71861   4
  -2 -12  -1 4.90093 1.63187   2
  -3 -12  -1 19.4482 4.48664   2
   3 -12   1 38.9886 2.99237   2
  -3 -12  -1 24.6745 3.58702   4
   3 -12   1 32.4779 3.26407   4
   4 -12   1 4.55082 1.52128   4
  -4 -12  -1 6.70776 1.95803   4
  -4 -12  -1 5.81583 2.14729   2
   4 -12   1 4.95116 1.23512   2
   5 -12   1 8.05509 1.53930   2
  -5 -12  -1 6.73976 2.52545   2
  -5 -12  -1 7.77405 2.28352   4
  -6 -12  -1 5.79975 2.52872   2
  -6 -12  -1 7.95143 2.33827   4
   6 -12   1 5.48176 1.44088   2
   7 -12   1 0.95455 1.12044   2
  -7 -12  -1 2.24043 2.54126   2
   8 -12   1 19.5331 2.89126   2
  -8 -12  -1 27.3060 4.26040   4
  -8 -12  -1 20.3091 4.08014   2
   9 -12   1 8.87022 2.11422   2
  -9 -12  -1 6.20965 3.22412   4
  10 -12   1 17.3449 3.00117   2
 -10 -12  -1 19.2866 4.86612   4
  -9 -13   1 12.2375 3.54151   4
  -9 -13   1 14.2149 3.79271   2
   9 -13  -1 11.6911 2.13670   2
   8 -13  -1 20.6219 2.71790   2
  -8 -13   1 13.4063 3.67926   4
  -8 -13   1 16.4151 3.75412   2
  -7 -13   1 49.5835 5.28044   4
   7 -13  -1 44.2060 4.26118   2
  -7 -13   1 50.2405 5.81331   2
   6 -13  -1 1.02554 1.11449   2
  -6 -13   1 3.65270 1.92019   4
  -6 -13   1 -0.5880 2.25192   2
  -5 -13   1 5.16787 2.47302   2
   5 -13  -1 7.64247 1.54668   2
  -5 -13   1 9.67099 2.35969   4
   4 -13  -1 39.1614 3.45696   2
   4 -13  -1 39.5220 4.24657   4
  -4 -13   1 32.9449 4.24274   2
  -4 -13   1 38.8311 4.19849   4
  -3 -13   1 82.0669 6.83251   4
   3 -13  -1 80.7559 6.74161   4
   3 -13  -1 79.3436 6.17122   2
  -3 -13   1 73.2702 6.85476   2
   2 -13  -1 28.0433 2.64250   2
   2 -13  -1 27.5981 3.27709   4
  -2 -13   1 23.3672 3.16968   2
  -2 -13   1 26.0396 3.27549   4
  -1 -13   1 3.15046 1.36512   2
   1 -13  -1 3.20283 1.77766   4
   1 -13  -1 3.08775 1.20415   2
  -1 -13   1 1.87241 1.61502   4
   0 -13   1 76.3976 6.38754   4
   0 -13  -1 76.9925 6.58150   4
   0 -13  -1 72.1090 6.21166   2
   0 -13   1 77.2462 6.12787   2
   1 -13   1 27.9128 3.43320   4
  -1 -13  -1 24.3352 3.13034   2
  -1 -13  -1 30.8795 3.69514   4
   1 -13   1 31.5888 2.95389   2
   2 -13   1 19.7753 2.22197   2
   2 -13   1 18.0406 2.67752   4
  -2 -13  -1 12.6757 2.48284   2
  -2 -13  -1 19.0743 3.01240   4
   3 -13   1 38.0250 3.93737   4
  -3 -13  -1 38.1432 4.28044   2
   3 -13   1 38.4434 3.44793   2
  -3 -13  -1 38.7156 4.35280   4
   4 -13   1 13.7030 2.31696   4
  -4 -13  -1 9.95107 2.78767   2
  -4 -13  -1 12.7958 2.68455   4
   4 -13   1 9.76545 1.72937   2
   5 -13   1 0.69176 1.01345   2
  -5 -13  -1 -0.0744 2.25866   2
  -5 -13  -1 2.70207 1.93990   4
   6 -13   1 11.6450 1.84411   2
  -6 -13  -1 12.6344 3.06915   4
  -6 -13  -1 3.37377 2.68601   2
   7 -13   1 6.37958 1.69683   2
  -7 -13  -1 12.6467 3.21580   4
  -7 -13  -1 8.68430 3.25830   2
   8 -13   1 150.261 11.8224   2
  -8 -13  -1 160.656 13.1255   4
  -9 -13  -1 58.6851 6.96145   4
   9 -13   1 52.1964 5.90797   2
  -8 -14   1 46.6924 6.34961   2
  -8 -14   1 42.3010 5.89561   4
   8 -14  -1 49.5734 4.49470   2
  -7 -14   1 6.35780 2.96370   2
   7 -14  -1 1.57045 1.39708   2
  -7 -14   1 1.30399 2.79401   4
  -6 -14   1 2.77524 2.61960   2
   6 -14  -1 1.17042 1.29970   2
  -6 -14   1 4.29965 2.23109   4
   5 -14  -1 43.0383 3.56699   2
  -5 -14   1 29.3687 4.76394   2
  -5 -14   1 33.3639 4.39572   4
  -4 -14   1 13.7043 2.99965   2
   4 -14  -1 16.0035 2.15891   2
  -4 -14   1 17.9815 3.33586   4
   4 -14  -1 16.3982 3.20050   4
  -3 -14   1 30.3849 3.88346   4
  -3 -14   1 28.3266 3.95792   2
   3 -14  -1 34.6750 3.11108   2
   3 -14  -1 33.0069 4.02354   4
  -2 -14   1 31.2334 3.76822   2
   2 -14  -1 36.1803 3.26783   2
  -2 -14   1 35.4046 3.98941   4
   2 -14  -1 30.6640 3.91302   4
   1 -14  -1 7.57479 1.73686   2
  -1 -14   1 8.47725 2.20748   4
   1 -14  -1 6.96981 2.39123   4
  -1 -14   1 8.68876 2.06713   2
   0 -14  -1 85.0244 7.17400   4
   0 -14   1 72.9079 6.93832   4
   0 -14   1 82.7551 6.56990   2
   0 -14  -1 79.9097 6.56307   2
  -1 -14  -1 15.9665 2.86511   2
  -1 -14  -1 21.7059 3.31570   4
   1 -14   1 19.5768 2.52741   2
   1 -14   1 25.3436 3.45292   4
   2 -14   1 22.5104 2.53298   2
   2 -14   1 21.4917 3.12933   4
  -2 -14  -1 27.0259 3.96295   4
  -2 -14  -1 13.2813 2.86082   2
  -3 -14  -1 5.71973 2.23274   2
  -3 -14  -1 6.64833 2.38208   4
   3 -14   1 7.04517 2.22717   4
   3 -14   1 6.16166 1.41101   2
   4 -14   1 36.3757 3.31611   2
  -4 -14  -1 26.6083 4.23269   2
  -4 -14  -1 29.7896 4.39352   4
   4 -14   1 36.3784 3.98014   4
  -5 -14  -1 16.1688 3.27648   4
  -5 -14  -1 11.3101 3.08894   2
   5 -14   1 11.2189 1.91419   2
   6 -14   1 49.2486 4.43171   2
  -6 -14  -1 46.9818 6.08595   4
  -6 -14  -1 48.2989 5.97393   2
  -7 -14  -1 12.0337 3.80850   2
   7 -14   1 20.3882 2.74949   2
  -8 -14  -1 21.7188 4.64262   4
  -8 -14  -1 16.4569 4.48493   2
  -7 -15   1 9.11471 3.57721   2
  -7 -15   1 3.00238 2.58442   4
   7 -15  -1 1.94945 1.58631   2
   6 -15  -1 8.86139 1.88124   2
  -6 -15   1 12.4490 3.62008   2
  -6 -15   1 10.5811 3.50776   4
  -5 -15   1 18.2156 3.56774   4
  -5 -15   1 14.2515 3.38201   2
   5 -15  -1 14.9152 2.30199   2
   4 -15  -1 2.42737 2.92723   4
  -4 -15   1 1.89522 2.32662   4
   4 -15  -1 2.19280 1.29220   2
  -4 -15   1 -1.3095 2.15464   2
   3 -15  -1 5.39720 2.66650   4
   3 -15  -1 8.95021 1.64494   2
  -3 -15   1 11.8864 2.90499   4
  -3 -15   1 2.15044 2.39326   2
   2 -15  -1 24.4132 3.90866   4
  -2 -15   1 23.9764 3.59734   2
  -2 -15   1 28.2014 4.05490   4
   2 -15  -1 23.1950 2.77031   2
  -1 -15   1 4.36569 2.47918   4
  -1 -15   1 4.54120 2.03752   2
   1 -15  -1 5.15350 1.70460   2
   1 -15  -1 7.88587 2.43390   4
   0 -15   1 13.0515 2.42829   2
   0 -15  -1 14.5426 2.62745   2
   0 -15   1 17.6476 3.18943   4
   0 -15  -1 23.8065 3.83645   4
  -1 -15  -1 27.0435 4.41590   4
  -1 -15  -1 18.7937 3.16026   2
   1 -15   1 24.6774 3.51932   4
   1 -15   1 23.6668 2.86753   2
  -2 -15  -1 2.15272 2.00857   2
  -2 -15  -1 2.48360 2.34166   4
   2 -15   1 0.39380 1.32044   2
   2 -15   1 4.02783 1.96666   4
   3 -15   1 1.09852 1.21728   2
   3 -15   1 1.67625 2.06762   4
  -3 -15  -1 2.43242 2.25603   2
  -3 -15  -1 5.61538 2.52314   4
   4 -15   1 2.08029 1.22992   2
  -4 -15  -1 2.40142 2.52788   2
  -4 -15  -1 1.94243 2.49077   4
   4 -15   1 4.91616 2.87450   4
  -5 -15  -1 30.7988 4.86765   4
  -5 -15  -1 29.6019 4.54154   2
   5 -15   1 21.8239 2.85495   2
  -6 -15  -1 5.81953 3.29483   2
  -6 -15  -1 14.6150 4.03663   4
   6 -15   1 7.37179 1.81821   2
   7 -15   1 44.3287 5.59122   2
  -7 -15  -1 32.8594 6.12942   2
  -7 -15  -1 39.2837 6.07192   4
  -6 -16   1 22.6507 4.32799   2
  -6 -16   1 15.7337 4.43903   4
  -5 -16   1 9.50367 3.15835   4
   5 -16  -1 7.77262 1.80605   2
   4 -16  -1 51.9982 6.34237   4
   4 -16  -1 55.8987 4.73131   2
  -4 -16   1 49.0996 5.95990   2
   3 -16  -1 7.96002 1.87184   2
  -3 -16   1 9.04567 2.99725   4
   3 -16  -1 13.4666 3.42864   4
  -3 -16   1 6.01783 2.72181   2
   2 -16  -1 1.58756 1.52313   2
  -2 -16   1 -1.1763 1.99482   2
  -2 -16   1 2.24273 2.27294   4
   2 -16  -1 5.13297 2.60911   4
  -1 -16   1 13.0201 3.13621   4
   1 -16  -1 12.4454 2.35508   2
   1 -16  -1 6.42462 2.85730   4
  -1 -16   1 7.46743 2.24673   2
   0 -16  -1 13.7402 2.63426   2
   0 -16   1 15.4600 2.70611   2
   0 -16   1 17.2430 3.38571   4
   0 -16  -1 16.5868 3.63891   4
  -1 -16  -1 10.3270 3.10285   4
   1 -16   1 8.91450 2.02726   2
   1 -16   1 8.80984 2.97952   4
  -1 -16  -1 7.99162 2.39313   2
  -2 -16  -1 20.2264 3.87302   4
   2 -16   1 20.0805 4.04656   4
  -2 -16  -1 17.1568 3.29656   2
   2 -16   1 17.1151 2.55512   2
  -3 -16  -1 43.9398 5.31387   2
   3 -16   1 55.5729 4.45376   2
  -3 -16  -1 39.9921 5.73103   4
   3 -16   1 40.4571 5.50333   4
  -4 -16  -1 5.12680 2.98169   2
   4 -16   1 8.97793 1.95085   2
   4 -16   1 7.21246 2.89379   4
  -5 -16  -1 5.79710 3.30791   4
  -5 -16  -1 3.63427 3.07084   2
   5 -16   1 4.22573 1.83645   2
   6 -16   1 8.72588 1.93982   2
  -6 -16  -1 10.7546 4.21309   4
  -6 -16  -1 6.77034 3.79584   2
  -4 -17   1 1.85539 3.34211   4
  -4 -17   1 4.38966 3.06558   2
   4 -17  -1 -3.4692 1.60265   2
   4 -17  -1 1.08148 3.72237   4
   3 -17  -1 3.70751 1.82951   2
   3 -17  -1 -1.7473 3.62010   4
  -3 -17   1 4.86428 4.64101   2
  -3 -17   1 4.48554 3.33346   4
   2 -17  -1 2.49240 1.76134   2
   2 -17  -1 -4.7615 3.35077   4
  -2 -17   1 -0.6558 2.50342   2
  -1 -17   1 19.9923 3.39399   2
   1 -17  -1 27.9523 3.39755   2
  -1 -17   1 19.4144 4.24697   4
   1 -17  -1 18.8386 4.24194   4
   0 -17   1 7.26965 2.34599   2
   0 -17  -1 -2.3377 3.19109   4
   0 -17  -1 6.14457 2.33884   2
   0 -17   1 3.17602 3.20976   4
   1 -17   1 16.3088 2.71079   2
  -1 -17  -1 19.4883 4.19758   4
  -1 -17  -1 12.9080 2.97509   2
   1 -17   1 11.7623 3.45676   4
   2 -17   1 12.6747 2.35968   2
   2 -17   1 9.08233 3.46448   4
  -2 -17  -1 6.74969 2.82777   2
   3 -17   1 3.84975 2.58535   2
   3 -17   1 4.45014 3.01559   4
  -3 -17  -1 8.00189 3.89708   4
  -3 -17  -1 1.52351 2.70331   2
   4 -17   1 -5.2207 3.96325   4
  -4 -17  -1 4.08300 3.52460   4
  -4 -17  -1 0.01782 3.77515   2
   4 -17   1 2.52604 1.74175   2
  -1 -18   1 16.3290 4.82878   4
  -1 -18   1 20.3723 3.63630   2
   0 -18  -1 10.2874 4.79512   4
   0 -18   1 14.0773 3.96901   4
   0 -18   1 22.2957 3.41815   2
  -1 -18  -1 22.4144 4.45631   2
  -1 -18  -1 18.0353 5.17177   4
   1 -18   1 23.7994 3.46956   2
 -10   0   2 83.3187 6.96558   3
  -9   0   2 48.3107 4.41526   3
  -8   0   2 189.106 13.9804   3
  -7   0   2 779.202 54.9939   3
  -6   0   2 41.3769 3.45308   3
   5   0  -2 113.045 8.45261   3
  -5   0   2 109.731 8.24663   3
  -4   0   2 126.475 8.93090   3
   4   0  -2 130.506 9.09371   3
   4   0  -2 107.585 9.02953   2
  -3   0   2 376.062 24.1772   3
   3   0  -2 347.101 24.1852   3
   3   0  -2 297.589 24.1309   2
   2   0  -2 50.1000 3.80537   3
   2   0  -2 44.0063 3.72377   2
  -2   0   2 55.1174 3.83084   3
  -1   0   2 845.043 53.3722   3
   1   0  -2 839.178 53.3655   3
  -1   0   2 696.345 53.2186   2
   1   0  -2 664.097 53.2019   2
   0   0  -2 74.3505 5.16100   3
   0   0   2 71.4827 5.15619   3
   0   0  -2 68.2810 5.00069   2
   0   0   2 70.7503 4.99818   2
  -1   0  -2 1356.53 93.1180   4
   1   0   2 1304.71 93.0892   4
   2   0   2 1265.98 91.9124   4
  -2   0  -2 1362.25 91.9892   4
   3   0   2 32.8603 2.58988   4
   3   0   2 35.5113 2.67751   3
   4   0   2 662.857 46.5750   3
   5   0   2 76.6685 5.74915   3
   6   0   2 384.814 103.475   1
  -6   0  -2 538.171 118.198   1
 -11   1   2 24.1219 4.14655   3
 -10  -1   2 5.19836 1.59484   3
 -10   1   2 5.77986 1.82856   3
  -9  -1   2 5.52148 1.47620   3
  -9   1   2 4.15440 1.66076   3
  -8  -1   2 765.602 53.9950   3
  -8   1   2 762.818 54.1549   3
  -7  -1   2 260.056 18.5580   3
  -7   1   2 255.773 18.6893   3
  -6  -1   2 212.387 15.5256   3
   6   1  -2 224.103 15.8301   3
  -6   1   2 211.361 15.6362   3
  -5  -1   2 221.874 15.6242   3
  -5  -1   2 197.468 15.4554   4
   5   1  -2 228.780 15.9568   3
  -5   1   2 224.940 15.8325   3
  -4  -1   2 757.530 56.5601   4
  -4  -1   2 857.459 56.7155   3
   4  -1  -2 873.445 56.9606   3
   4   1  -2 682.135 56.8189   2
  -4   1   2 820.821 56.7940   3
   4   1  -2 850.653 56.8265   3
   3  -1  -2 4708.63 303.729   3
  -3  -1   2 3770.86 303.604   2
   3   1  -2 4552.87 303.603   3
  -2  -1   2 1336.72 90.2519   3
   2  -1  -2 1350.20 90.3660   3
   2   1  -2 1298.05 90.2428   3
   2   1  -2 1066.25 90.1887   2
  -2   1   2 1394.12 90.3658   3
   1  -1  -2 1620.68 111.472   4
  -1  -1   2 1493.20 111.401   2
   1  -1  -2 1554.34 111.541   3
  -1  -1   2 1615.18 111.473   3
  -1   1   2 1594.17 111.568   3
   1   1  -2 1627.05 111.474   3
  -1   1   2 1610.16 111.465   4
   1   1  -2 1636.70 111.392   2
   0  -1   2 2.23163 0.21840   2
   0  -1  -2 1.49665 0.31855   3
   0  -1  -2 1.52000 0.32697   4
   0   1  -2 1.53825 0.19836   2
   0   1   2 1.16876 0.32079   3
   0   1   2 1.66956 0.34652   4
  -1  -1  -2 142.730 9.71838   4
  -1  -1  -2 143.227 9.60369   5
   1  -1   2 116.525 9.57693   2
   1   1   2 143.075 9.65335   3
   1   1   2 130.949 9.60366   5
   1   1   2 137.944 9.67872   4
  -2  -1  -2 281.253 19.0301   4
  -2  -1  -2 250.114 18.9683   5
   2   1   2 274.666 18.9666   4
   3  -1   2 61.6156 4.38053   3
  -3  -1  -2 55.6279 4.31973   4
   3   1   2 58.3772 4.24662   3
   3   1   2 54.5130 4.23104   4
  -4  -1  -2 18.8254 1.61849   4
   4  -1   2 17.2907 1.57477   3
   4   1   2 14.9942 1.41665   3
   4   1   2 15.4338 1.41814   4
   5  -1   2 99.8252 7.44438   3
   5   1   2 105.222 7.31134   3
   5   1   2 93.2604 7.28182   4
  -6  -1  -2 4.47944 0.99297   4
   6   1   2 2.54913 0.93692   3
 -11   2   2 6.75229 2.24884   3
 -10   2   2 53.6871 5.32720   3
  -9  -2   2 70.2132 5.76473   3
  -9   2   2 71.5298 6.22442   3
  -8  -2   2 101.292 7.58172   3
  -8   2   2 97.6088 7.91033   3
  -7  -2   2 57.4947 4.70942   3
  -7  -2   2 64.1684 5.18088   4
  -7   2   2 59.7469 5.01213   3
   7   2  -2 59.7057 5.20349   3
  -6  -2   2 72.0557 5.64873   4
  -6  -2   2 74.1438 5.66695   3
  -6   2   2 77.4553 5.92409   3
   6   2  -2 77.7551 5.96866   3
  -5  -2   2 192.432 13.4666   3
  -5  -2   2 170.432 13.4266   4
   5   2  -2 200.456 13.6765   3
  -5   2   2 188.275 13.6775   3
  -4  -2   2 877.027 57.5859   3
  -4  -2   2 729.944 57.5124   4
   4  -2  -2 811.449 57.8906   3
  -4   2   2 829.473 57.8174   3
   4   2  -2 852.880 57.6625   3
  -3  -2   2 1596.36 98.0710   3
  -3  -2   2 1316.91 97.9959   4
  -3  -2   2 1214.23 98.1461   2
   3  -2  -2 1532.20 98.3337   3
   3   2  -2 1223.96 98.1029   2
   3   2  -2 1470.80 98.0648   3
  -3   2   2 1446.69 98.1860   3
   2  -2  -2 821.170 53.1036   3
  -2  -2   2 694.175 52.8573   4
  -2  -2   2 800.916 52.8854   3
  -2  -2   2 673.278 52.9190   2
   2   2  -2 714.787 52.8900   2
  -2   2   2 810.717 53.0456   3
   2   2  -2 763.846 52.8644   3
  -1  -2   2 733.719 46.9533   2
   1  -2  -2 700.409 46.9824   4
   1  -2  -2 605.248 46.8333   2
   1  -2  -2 604.359 47.0692   3
  -1   2   2 643.712 47.0787   3
  -1   2   2 731.776 46.9600   4
   0  -2   2 49.1851 3.60903   2
   0  -2  -2 55.0961 3.56096   2
   0  -2  -2 48.9866 3.72842   4
   0  -2  -2 46.3797 3.74676   3
   0   2   2 49.4269 3.70031   4
   0   2  -2 49.1648 3.61706   2
   0   2   2 53.5829 3.55026   2
   0   2   2 46.8557 3.75602   3
  -1  -2  -2 367.063 26.6455   2
  -1  -2  -2 381.602 26.7143   4
   1  -2   2 377.513 26.6249   2
  -1  -2  -2 412.232 26.6701   3
   1   2   2 370.167 26.6291   2
   1   2   2 378.116 26.6396   5
   1   2   2 370.583 26.6773   4
  -1   2  -2 340.885 26.6110   2
   1   2   2 414.525 26.6851   3
  -2  -2  -2 31.6063 2.55603   2
  -2  -2  -2 33.5296 2.47487   5
   2  -2   2 35.1048 2.60036   3
  -2  -2  -2 32.3543 2.50936   4
   2   2   2 34.1962 2.58081   2
   2   2   2 30.8351 2.46029   4
   2   2   2 25.8838 2.43465   5
  -3  -2  -2 41.4190 3.53126   5
  -3  -2  -2 46.0922 3.55173   4
   3  -2   2 49.4271 3.63346   3
   3   2   2 50.7854 3.92195   2
   3   2   2 44.3204 3.47511   4
  -4  -2  -2 837.299 58.7758   4
   4  -2   2 870.915 58.8413   3
   4   2   2 823.486 58.5949   3
   4   2   2 816.025 58.6877   4
  -5  -2  -2 224.287 16.2767   4
   5   2   2 241.602 16.1449   3
   5   2   2 215.005 16.1552   4
  -6  -2  -2 4.68412 1.04093   4
  -7  -2  -2 104.177 7.81879   4
   7   2   2 101.294 7.77690   3
  -8  -2  -2 69.0596 5.68984   4
 -14  -2  -2 10.9248 2.61202   5
 -11   3   2 2.49182 2.40315   3
 -10   3   2 11.8502 2.47109   3
  -9  -3   2 27.1865 2.85488   4
  -9  -3   2 27.4632 2.74360   3
  -9   3   2 27.3358 3.33521   3
  -8  -3   2 121.922 9.48138   3
  -8  -3   2 125.593 9.56496   4
  -8   3   2 132.668 10.0071   3
   8   3  -2 135.610 9.95571   3
  -7  -3   2 107.916 8.19837   3
  -7  -3   2 116.635 8.36947   4
   7   3  -2 116.270 8.62802   3
  -7   3   2 106.863 8.64115   3
  -6  -3   2 30.4061 2.90572   4
  -6  -3   2 32.6389 2.67823   3
   6   3  -2 34.2402 3.04013   3
  -6   3   2 36.6459 3.13988   3
  -5  -3   2 331.470 23.4782   4
  -5  -3   2 283.603 23.6350   2
  -5  -3   2 358.194 23.2427   3
  -5   3   2 336.267 23.5684   3
  -4  -3   2 98.4299 8.19288   2
  -4  -3   2 106.879 7.96227   4
  -4   3   2 113.549 8.14902   3
   4   3  -2 113.335 7.91558   3
  -3  -3   2 35.2970 2.98385   2
   3  -3  -2 35.8659 3.12632   3
  -3  -3   2 35.0988 2.81651   4
  -3   3   2 37.8187 2.98268   3
   3   3  -2 31.5406 2.85297   2
   2  -3  -2 62.5845 5.69636   3
  -2  -3   2 70.1092 5.41087   2
  -2  -3   2 72.5980 5.36111   4
  -2  -3   2 73.4199 5.29629   3
   2   3  -2 84.7766 5.48853   2
  -2   3   2 69.7753 5.47214   3
   1  -3  -2 133.111 9.37017   4
  -1  -3   2 132.075 9.25624   5
   1  -3  -2 123.070 9.52312   3
   1  -3  -2 131.118 9.23638   2
  -1  -3   2 146.877 9.36468   2
  -1  -3   2 139.340 9.42163   4
  -1   3   2 137.715 9.32371   4
  -1   3   2 117.824 9.45779   3
  -1   3   2 115.138 9.23128   2
   0  -3  -2 364.392 25.4239   4
   0  -3   2 324.847 25.3868   4
   0  -3  -2 394.300 25.2741   2
   0  -3  -2 330.918 25.4681   3
   0  -3   2 385.438 25.3312   2
   0   3   2 357.520 25.3817   4
   0   3  -2 378.934 25.3453   2
   0   3   2 312.836 25.4303   3
   0   3   2 393.576 25.2697   2
  -1  -3  -2 470.333 33.9294   4
  -1  -3  -2 503.527 33.8968   3
   1  -3   2 467.313 33.8413   2
   1  -3   2 518.819 34.0166   3
  -1  -3  -2 455.787 33.8624   2
  -1   3  -2 456.954 33.8465   2
   1   3   2 505.451 33.8771   5
   1   3   2 506.118 33.8261   2
   1   3   2 474.248 33.8864   3
   1   3   2 463.470 33.8905   4
   2  -3   2 368.048 26.0804   2
   2  -3   2 410.294 26.2716   3
  -2  -3  -2 353.117 26.1591   2
  -2  -3  -2 385.555 26.0923   5
  -2  -3  -2 349.496 26.1247   4
   2   3   2 350.823 26.1988   5
   2   3   2 378.683 26.1423   2
   2   3   2 363.894 26.1778   4
  -3  -3  -2 27.3067 2.38736   4
  -3  -3  -2 27.3168 2.35702   5
   3  -3   2 28.9340 2.45333   3
  -3  -3  -2 28.9083 2.53020   2
   3   3   2 28.6454 2.35368   4
   3   3   2 32.2574 2.55583   2
  -4  -3  -2 286.654 21.2646   5
  -4  -3  -2 307.591 21.2360   4
   4   3   2 299.558 21.1515   4
  -5  -3  -2 65.8069 5.19312   5
  -6  -3  -2 36.3129 3.21523   4
  -7  -3  -2 27.8157 2.83281   4
   7   3   2 28.7323 2.85072   3
  -8  -3  -2 48.7422 4.40561   4
   8   3   2 50.9938 4.50868   3
  -9  -3  -2 12.6563 2.19957   4
 -10  -3  -2 3.27388 1.84822   4
 -12  -3  -2 1.83561 1.58798   5
 -13  -3  -2 10.1014 2.45095   5
 -11   4   2 9.34798 2.92237   3
 -10  -4   2 11.7515 2.03450   4
 -10   4   2 5.96208 2.40764   3
  -9  -4   2 23.5765 2.75812   4
  -9   4   2 26.0185 4.00079   3
  -8  -4   2 113.710 8.23345   4
  -8   4   2 99.5550 8.51522   3
  -7  -4   2 8.34320 1.45488   4
  -7   4   2 4.88624 1.52374   3
  -6  -4   2 20.8562 2.18770   4
  -6  -4   2 20.1992 2.57820   2
  -6   4   2 20.6191 2.27647   3
  -5  -4   2 76.4799 6.74103   2
  -5  -4   2 85.9989 6.46185   4
  -5   4   2 90.5145 6.64134   3
  -4  -4   2 248.058 17.8015   4
  -4  -4   2 237.056 18.0410   2
  -4   4   2 259.842 17.9837   3
  -3  -4   2 75.6288 5.18380   4
  -3   4   2 68.6348 5.27195   3
   3   4  -2 57.1720 5.33794   4
   2  -4  -2 369.020 30.1551   3
  -2  -4   2 456.025 30.0256   4
  -2  -4   2 419.681 30.0420   2
   2  -4  -2 427.334 29.8584   2
  -2  -4   2 403.261 29.8824   5
  -2   4   2 473.572 30.1746   3
   1  -4  -2 77.7648 5.75987   2
  -1  -4   2 88.0191 5.78140   5
  -1  -4   2 87.4063 5.89706   2
   1  -4  -2 72.5773 6.09056   3
   1  -4  -2 78.8992 5.89925   4
  -1  -4   2 83.3967 5.96072   4
  -1   4   2 74.2729 5.77506   2
  -1   4   2 72.4631 5.98131   3
  -1   4   2 78.8108 5.83691   4
   1   4  -2 90.5453 5.87056   2
   0  -4   2 37.9879 2.92005   4
   0  -4  -2 39.7429 2.75627   2
   0  -4   2 33.6753 2.92014   3
   0  -4  -2 37.2460 2.91706   4
   0  -4  -2 31.8439 2.97644   3
   0  -4   2 39.6606 2.80908   2
   0   4  -2 41.2751 2.90767   2
   0   4   2 40.3938 2.75295   2
   0   4   2 36.8434 2.86550   4
   0   4   2 32.2882 2.88876   3
  -1  -4  -2 69.6698 5.45950   4
   1  -4   2 69.8331 5.34790   2
  -1  -4  -2 77.6662 5.41482   2
  -1  -4  -2 72.2220 5.44594   3
   1  -4   2 74.9437 5.41533   4
   1   4   2 84.2833 5.33226   2
   1   4   2 83.4249 5.42284   5
  -1   4  -2 70.2974 5.37348   2
   1   4   2 63.8028 5.35380   3
   1   4   2 69.7403 5.41942   4
  -2  -4  -2 16.6881 1.34186   5
  -2  -4  -2 13.8955 1.43141   4
   2  -4   2 14.6744 1.32071   4
  -2  -4  -2 14.0651 1.44856   2
   2  -4   2 15.0106 1.31285   2
   2  -4   2 15.3377 1.48657   3
   2   4   2 12.7350 1.39701   4
   2   4   2 13.6115 1.33625   5
  -3  -4  -2 495.966 36.3401   2
  -3  -4  -2 492.873 36.2322   4
   3  -4   2 521.589 36.1973   2
  -3  -4  -2 530.889 36.2228   5
   3   4   2 525.092 36.2895   2
  -4  -4  -2 65.1239 5.23133   2
  -4  -4  -2 64.2768 5.04798   4
  -4  -4  -2 65.8845 5.04363   5
  -5  -4  -2 67.1514 5.54031   5
  -5  -4  -2 74.8698 5.59422   4
  -6  -4  -2 51.3739 4.18489   4
  -6  -4  -2 47.7540 4.18565   5
  -7  -4  -2 69.4206 5.57732   4
  -7  -4  -2 67.6154 5.63489   5
  -8  -4  -2 25.6738 3.06453   5
  -8  -4  -2 36.3552 3.35426   4
  -9  -4  -2 19.4563 2.81379   4
  -9  -4  -2 16.4945 2.63184   5
 -10  -4  -2 24.3827 3.39307   4
 -10  -4  -2 22.2126 2.90640   5
 -11  -4  -2 60.4063 5.71542   4
 -11  -4  -2 49.2987 5.09199   5
 -12  -4  -2 0.33909 1.22940   5
 -13  -4  -2 19.7050 3.20800   5
 -13  -5   2 4.18341 1.81618   5
 -12  -5   2 5.20200 3.03837   4
 -11  -5   2 21.9987 3.09496   4
 -11   5   2 17.8410 3.62896   3
 -10  -5   2 47.0592 4.32854   4
 -10   5   2 38.7484 4.77328   3
  -9  -5   2 27.8369 3.13167   4
  -9   5   2 26.0093 3.40445   3
  -8  -5   2 16.9847 2.41311   4
  -8   5   2 12.8780 2.45726   3
  -7  -5   2 6.48495 1.41957   4
  -7  -5   2 3.96267 1.71325   2
  -7   5   2 4.55779 1.45824   3
  -6  -5   2 65.0964 5.99588   2
  -6  -5   2 73.3289 5.57883   4
  -6   5   2 70.0359 5.80597   3
  -5  -5   2 53.6443 4.84304   2
  -5  -5   2 54.0018 4.53780   4
  -5   5   2 60.8967 4.75207   3
   4  -5  -2 180.174 14.7294   2
  -4  -5   2 211.382 14.9114   4
  -4  -5   2 224.689 15.2306   2
  -4   5   2 212.365 15.0642   3
  -3  -5   2 122.535 8.39757   2
  -3  -5   2 116.844 8.22350   4
   3  -5  -2 106.375 8.02927   2
  -3  -5   2 91.9131 8.03634   5
  -3   5   2 120.063 8.35830   3
  -2  -5   2 82.7984 5.98206   2
   2  -5  -2 79.0719 5.75214   2
  -2  -5   2 84.1385 5.78088   5
   2  -5  -2 77.5351 5.84235   4
  -2   5   2 76.0909 5.75277   4
  -2   5   2 74.7579 6.01833   3
  -1  -5   2 76.3948 6.04716   2
   1  -5  -2 73.8898 6.10436   3
  -1  -5   2 67.9240 5.81212   3
  -1  -5   2 87.2715 5.95325   4
   1  -5  -2 84.2881 5.72343   2
   1  -5  -2 83.1825 5.88286   4
  -1   5   2 76.7836 5.96636   3
  -1   5   2 79.7154 5.74920   2
   1   5  -2 78.4596 5.76638   5
  -1   5   2 83.9330 5.91667   4
   0  -5   2 453.417 29.5973   2
   0  -5  -2 448.753 29.5348   2
   0  -5   2 438.968 29.6871   4
   0  -5   2 349.494 29.6930   3
   0  -5  -2 411.234 29.6868   4
   0   5  -2 446.659 29.6265   2
   0   5   2 381.165 29.6609   3
   0   5   2 441.103 29.5357   2
   0   5   2 410.987 29.6386   4
  -1  -5  -2 37.1839 2.92993   2
  -1  -5  -2 33.8936 2.98600   4
   1  -5   2 40.5203 2.95620   4
   1  -5   2 35.4433 2.93583   2
  -1  -5  -2 37.0987 3.01961   3
   1  -5   2 37.4667 3.04553   3
   1   5   2 37.5305 2.89593   3
   1   5   2 34.4968 2.94930   4
  -1   5  -2 34.9305 2.89754   2
   1   5   2 43.9251 2.95054   5
   2  -5   2 881.256 63.6547   2
  -2  -5  -2 884.697 63.7762   2
   2  -5   2 956.039 63.6260   4
  -3  -5  -2 11.5877 1.48660   4
  -3  -5  -2 15.7870 1.36108   5
   3  -5   2 12.4232 1.31804   2
  -3  -5  -2 11.5408 1.68405   2
  -4  -5  -2 16.3882 2.11076   2
   4  -5   2 20.7582 1.90572   2
  -4  -5  -2 19.6700 2.05514   4
  -4  -5  -2 22.8156 1.95017   5
  -5  -5  -2 126.525 9.21470   5
  -5  -5  -2 125.251 9.25072   4
   5  -5   2 118.604 9.12968   2
  -5  -5  -2 121.462 9.46078   2
  -6  -5  -2 84.6654 6.49677   4
  -6  -5  -2 79.1241 6.43795   5
  -7  -5  -2 168.532 12.9028   5
  -7  -5  -2 176.726 12.8907   4
  -8  -5  -2 54.2684 4.59555   4
  -8  -5  -2 43.5935 4.38897   5
  -9  -5  -2 52.1082 5.07568   5
  -9  -5  -2 63.1099 5.37652   4
 -10  -5  -2 17.0075 2.77497   4
 -10  -5  -2 11.9925 2.32717   5
 -11  -5  -2 1.60716 2.25013   4
 -11  -5  -2 0.17021 1.07387   5
 -12  -5  -2 47.6080 4.94231   5
 -12  -5  -2 57.6958 6.15218   4
 -13  -5  -2 3.46112 1.78400   5
 -13  -6   2 3.63058 1.99957   5
 -13  -6   2 4.94971 3.47655   4
 -12  -6   2 19.6905 3.30432   4
 -12  -6   2 10.7216 2.50299   5
 -11  -6   2 20.9982 3.12238   4
 -11  -6   2 16.1434 2.79925   5
 -11   6   2 14.6350 3.57033   3
 -10  -6   2 11.0978 2.46566   4
 -10  -6   2 7.94056 1.95340   5
 -10   6   2 9.95371 2.61604   3
  -9  -6   2 90.4076 6.73420   4
  -9  -6   2 69.3292 6.53518   5
  -9   6   2 78.5253 7.19150   3
  -8  -6   2 0.32155 0.82616   5
  -8  -6   2 4.45752 1.41939   4
  -8   6   2 1.87280 1.36627   3
  -7  -6   2 99.2099 8.89944   5
  -7  -6   2 122.750 9.59899   2
  -7  -6   2 136.340 9.09541   4
  -7   6   2 111.163 9.21996   3
  -6  -6   2 288.534 21.4182   2
  -6  -6   2 268.631 20.9464   5
  -6  -6   2 314.173 21.0195   4
   5  -6  -2 37.8192 3.00381   2
  -5  -6   2 40.8445 3.69076   2
  -5  -6   2 34.0626 3.19506   4
  -5   6   2 30.7590 3.26296   3
   4  -6  -2 236.955 16.8627   2
  -4  -6   2 244.105 17.3027   2
  -4  -6   2 236.797 17.0255   4
  -4  -6   2 212.099 16.8812   5
  -4   6   2 250.559 17.2079   3
   3  -6  -2 486.569 34.9047   2
  -3  -6   2 509.876 35.1079   4
  -3  -6   2 488.701 34.9304   5
  -3  -6   2 442.582 35.1700   2
  -3   6   2 549.781 35.3039   3
  -2  -6   2 29.9264 2.48795   4
   2  -6  -2 27.5522 2.36302   4
  -2  -6   2 29.0355 2.46929   2
  -2  -6   2 23.8439 2.19596   3
   2  -6  -2 27.4916 2.19787   2
  -2   6   2 30.7270 2.56402   3
  -2   6   2 27.0592 2.26873   4
  -1  -6   2 121.518 8.17292   4
   1  -6  -2 115.365 7.91842   2
   1  -6  -2 106.421 8.09243   4
   1  -6  -2 101.912 8.33117   3
  -1  -6   2 126.552 8.09552   2
  -1  -6   2 99.2536 8.00817   3
   1   6  -2 107.669 8.06075   5
  -1   6   2 110.882 8.03236   4
  -1   6   2 103.355 7.94390   2
   0  -6   2 348.955 23.8737   4
   0  -6  -2 301.562 23.9190   3
   0  -6   2 330.495 23.7752   3
   0  -6  -2 347.257 23.6337   2
   0  -6  -2 322.037 23.8088   4
   0  -6   2 341.662 23.6811   2
   0   6   2 358.040 23.8156   3
   0   6   2 330.137 23.6310   2
  -1  -6  -2 128.757 8.92144   2
   1  -6   2 130.703 8.93627   4
  -1  -6  -2 108.124 9.00030   3
  -1  -6  -2 113.099 8.98144   4
   1  -6   2 117.198 8.83215   2
   1   6   2 126.176 8.87582   3
   1   6   2 132.291 8.81671   2
  -2  -6  -2 12.6814 1.74691   2
   2  -6   2 12.4086 1.30102   2
   2  -6   2 14.6264 1.40126   4
  -2  -6  -2 14.7000 1.54513   4
   3  -6   2 339.428 23.7407   2
  -3  -6  -2 335.647 23.9586   2
  -3  -6  -2 326.926 23.8667   4
   4  -6   2 34.9808 3.17500   2
  -4  -6  -2 42.0559 3.23918   5
  -4  -6  -2 40.9888 3.65731   2
  -4  -6  -2 37.7729 3.40950   4
   5  -6   2 214.350 14.9912   2
  -5  -6  -2 217.494 15.0049   5
  -5  -6  -2 203.348 15.0747   4
  -5  -6  -2 186.677 15.2337   2
  -6  -6  -2 123.253 9.76451   2
  -6  -6  -2 126.555 9.37916   5
  -6  -6  -2 130.019 9.45832   4
   6  -6   2 114.416 9.28701   2
  -7  -6  -2 102.179 8.39921   5
  -7  -6  -2 119.486 8.61799   4
   7  -6   2 104.256 8.36810   2
  -8  -6  -2 42.8390 4.20892   4
  -9  -6  -2 5.34171 2.10345   4
  -9  -6  -2 5.99463 1.58429   5
 -10  -6  -2 12.2827 2.35461   5
 -11  -6  -2 3.46539 1.48001   5
 -11  -6  -2 8.78476 2.79829   4
 -12  -6  -2 7.07064 1.90361   5
 -12  -6  -2 1.10088 2.92476   4
 -13  -6  -2 1.93112 1.63828   5
 -13  -7   2 38.5926 4.64675   5
 -13  -7   2 43.8263 6.16758   4
 -12  -7   2 5.21275 1.86280   5
 -12  -7   2 5.28851 2.78007   4
 -11  -7   2 2.09648 1.34906   5
 -11  -7   2 1.78795 2.13983   4
 -11   7   2 1.74604 2.59521   3
 -10  -7   2 1.79014 1.85401   4
 -10  -7   2 0.19215 1.09820   5
 -10   7   2 0.56560 1.97707   3
  -9  -7   2 39.3625 3.94006   5
  -9   7   2 40.8281 4.70751   3
  -8  -7   2 9.25798 2.21540   2
  -8  -7   2 10.6603 2.10731   4
  -8  -7   2 4.62649 1.62241   5
  -8   7   2 5.37652 1.77411   3
  -7  -7   2 -0.6699 0.65459   5
  -7  -7   2 0.75418 1.11334   4
   7  -7  -2 -0.0240 0.75388   2
  -7   7   2 0.91247 1.96747   3
  -6  -7   2 3.83275 1.46329   2
  -6  -7   2 3.69455 1.19239   4
  -6   7   2 3.98938 1.37610   3
  -5  -7   2 1.75611 0.90816   4
  -5  -7   2 -1.9324 1.09511   2
   5  -7  -2 1.96050 0.76383   2
  -5  -7   2 0.29340 0.57714   5
  -5   7   2 0.15041 0.88584   3
   4  -7  -2 12.0951 1.28513   2
  -4   7   2 8.17613 1.57009   3
  -3  -7   2 216.185 16.2033   2
  -3  -7   2 221.196 16.0943   4
   3  -7  -2 213.361 15.8446   2
  -3  -7   2 231.688 15.8847   5
  -3   7   2 228.303 16.2267   3
  -2  -7   2 14.0954 1.63534   4
   2  -7  -2 11.6568 1.53256   4
   2  -7  -2 12.5190 1.26268   2
  -2   7   2 17.6180 1.75739   3
  -1  -7   2 33.8539 2.61333   2
   1  -7  -2 32.0699 2.76466   4
   1  -7  -2 29.7454 2.40011   2
  -1  -7   2 26.4506 2.49214   3
  -1  -7   2 30.5413 2.72336   4
  -1   7   2 38.0034 2.84037   3
   1   7  -2 27.9257 2.47493   5
   0  -7  -2 9.88329 1.32013   4
   0  -7   2 7.63648 1.21350   4
   0  -7  -2 8.63985 0.91324   2
   0  -7   2 4.98684 0.97862   3
   0  -7   2 7.59616 0.94969   2
   0  -7  -2 8.37012 1.45417   3
   0   7  -2 7.22992 0.83499   5
  -1  -7  -2 40.1436 3.29024   2
  -1  -7  -2 39.3241 3.43086   4
   1  -7   2 44.6267 3.35370   4
  -1  -7  -2 33.7301 3.49619   3
   1  -7   2 41.1658 3.20411   2
   1   7   2 44.4014 3.32183   3
   2  -7   2 0.77797 0.40919   2
   2  -7   2 0.93936 0.65860   4
  -2  -7  -2 0.44811 0.75340   2
  -2  -7  -2 0.11730 0.67870   3
  -2  -7  -2 0.92578 0.69914   4
   2   7   2 0.58364 0.52342   3
  -3  -7  -2 218.486 16.3038   2
   3  -7   2 233.133 15.9652   4
   3  -7   2 223.732 16.0658   2
  -3  -7  -2 218.240 16.2454   4
   4  -7   2 158.802 11.7329   2
  -4  -7  -2 148.477 12.0107   2
  -4  -7  -2 181.488 11.7867   5
  -4  -7  -2 151.953 11.8943   4
  -5  -7  -2 32.1734 2.85189   5
  -5  -7  -2 32.3707 3.12148   4
   5  -7   2 33.5825 2.86712   2
  -5  -7  -2 26.6061 3.24916   2
  -6  -7  -2 70.5024 6.71857   2
   6  -7   2 81.7160 6.32485   2
  -6  -7  -2 81.4270 6.31361   5
  -6  -7  -2 83.4389 6.56602   4
  -7  -7  -2 285.421 20.6646   5
   7  -7   2 282.455 20.6663   2
  -7  -7  -2 283.346 20.8038   4
  -8  -7  -2 97.1183 7.95390   4
  -8  -7  -2 99.5339 7.72240   5
   8  -7   2 90.4431 7.60727   2
  -9  -7  -2 28.3470 3.01963   5
  -9  -7  -2 25.6391 3.81275   4
   9  -7   2 18.9151 2.93228   2
 -10  -7  -2 17.8299 3.20820   4
  10  -7   2 15.7740 2.68303   2
 -10  -7  -2 15.7091 2.72775   5
 -11  -7  -2 20.2796 3.12253   5
  11  -7   2 17.4063 3.02647   2
 -11  -7  -2 23.0012 3.90329   4
  12  -7   2 33.5622 4.18526   2
 -12  -7  -2 43.6265 6.88461   5
 -12  -7  -2 30.9427 5.17856   4
 -12  -8   2 12.4998 2.68965   5
  12  -8  -2 12.9332 4.62638   2
 -12  -8   2 12.1968 3.39305   4
  11  -8  -2 102.139 8.17788   2
 -11  -8   2 116.715 8.94660   4
 -11  -8   2 98.9755 8.25121   5
 -11   8   2 76.0357 8.96982   3
  10  -8  -2 45.7004 4.31417   2
 -10  -8   2 51.8607 4.97472   4
 -10  -8   2 42.3052 4.42015   5
 -10   8   2 39.6503 5.27825   3
  -9  -8   2 24.6574 2.83925   5
  -9  -8   2 24.7659 3.33323   4
   9  -8  -2 22.6771 2.74673   2
  -9   8   2 14.7982 3.24396   3
  -8  -8   2 12.7470 2.16187   5
  -8  -8   2 20.0535 2.86951   4
  -8  -8   2 12.2446 2.93304   2
   8  -8  -2 15.9178 2.04929   2
  -8   8   2 15.2766 2.84152   3
  -7  -8   2 28.3242 2.97113   5
  -7  -8   2 28.8260 3.81465   2
   7  -8  -2 27.3277 2.83883   2
  -7   8   2 31.7426 3.63568   3
   6  -8  -2 213.441 15.1701   2
  -6  -8   2 220.440 15.4375   4
  -6  -8   2 213.089 15.2342   5
  -6  -8   2 190.347 15.7753   2
  -6   8   2 199.621 15.6834   3
  -5  -8   2 124.162 9.18942   5
   5  -8  -2 122.919 9.15819   2
  -5  -8   2 117.237 9.76698   2
  -5  -8   2 125.138 9.41506   4
  -5   8   2 126.404 9.67403   3
  -4  -8   2 493.582 34.3911   4
  -4  -8   2 530.882 34.1808   5
  -4  -8   2 436.217 34.5310   2
   4  -8  -2 461.895 34.1048   2
  -4   8   2 487.695 34.5855   3
   3  -8  -2 33.8956 2.98548   2
   3  -8  -2 31.3823 3.32562   4
  -3  -8   2 41.2466 3.37665   4
  -3  -8   2 47.7042 3.68928   2
  -3   8   2 38.3063 3.47774   3
  -2  -8   2 47.3131 3.94431   4
   2  -8  -2 49.6802 3.64475   2
   2  -8  -2 49.4917 3.91115   4
  -2  -8   2 39.6018 3.64677   3
  -2  -8   2 49.2603 3.97636   2
  -2   8   2 50.5116 4.08228   3
  -1  -8   2 5.13926 1.06716   4
   1  -8  -2 4.65187 1.03070   4
  -1  -8   2 5.08846 0.96865   2
   1  -8  -2 4.42328 0.74242   2
  -1  -8   2 3.63979 0.82182   3
   1   8  -2 2.92310 0.69631   5
  -1   8   2 6.46202 1.21603   3
   0  -8   2 51.8484 4.45165   4
   0  -8  -2 52.8636 4.52126   4
   0  -8  -2 58.2193 4.29117   2
   0  -8   2 55.2012 4.32319   2
   0   8  -2 57.9170 4.23617   5
   0   8   2 59.7505 4.55508   3
   1  -8   2 222.976 15.3703   2
  -1  -8  -2 222.498 15.4659   2
  -1  -8  -2 186.979 15.6096   3
   1  -8   2 226.166 15.4797   4
  -1  -8  -2 216.041 15.6100   4
   1   8   2 212.159 15.4537   3
   2  -8   2 8.11047 1.05509   2
  -2  -8  -2 8.05478 1.37481   4
  -2  -8  -2 6.58439 1.31800   2
  -2  -8  -2 4.54187 1.19137   3
   2  -8   2 8.86085 1.24065   4
   2   8   2 7.34624 1.19390   3
   3  -8   2 42.2071 3.41081   2
  -3  -8  -2 42.0434 3.67742   4
  -3  -8  -2 39.7258 3.73480   2
  -4  -8  -2 81.5554 7.07228   2
   4  -8   2 89.9750 6.69721   2
  -4  -8  -2 89.6516 6.98003   4
   5  -8   2 31.0925 2.84983   2
  -5  -8  -2 29.0837 3.15401   4
  -5  -8  -2 23.9591 3.50194   2
  -5  -8  -2 32.9427 2.81503   5
  -6  -8  -2 27.8152 3.08305   4
  -6  -8  -2 19.8682 3.01500   2
  -6  -8  -2 23.2437 2.43381   5
   6  -8   2 23.8154 2.52195   2
  -7  -8  -2 24.4941 2.98893   4
   7  -8   2 16.4055 2.31670   2
  -7  -8  -2 17.5335 3.01011   2
  -8  -8  -2 9.54384 2.34248   4
  -8  -8  -2 10.5193 1.81886   5
   8  -8   2 4.30658 1.59983   2
  -9  -8  -2 9.12022 1.82967   5
   9  -8   2 11.4725 2.11742   2
  -9  -8  -2 12.5880 2.82028   4
 -10  -8  -2 6.74251 2.82381   4
  10  -8   2 7.71841 1.94615   2
 -10  -8  -2 9.45474 2.03522   5
  11  -8   2 6.76488 2.08616   2
 -11  -8  -2 9.95757 2.02356   5
 -11  -8  -2 8.79333 3.39185   4
  12  -8   2 31.2886 3.80917   2
 -12  -8  -2 24.3684 4.87614   4
 -12  -8  -2 26.5413 3.65612   5
 -12  -9   2 21.2458 3.55860   5
 -12  -9   2 29.0949 4.72220   4
  12  -9  -2 26.5177 3.63487   2
 -11  -9   2 45.5942 5.27149   4
 -11  -9   2 33.9093 4.19614   5
  11  -9  -2 43.4321 4.37900   2
 -10  -9   2 24.5690 3.70866   4
  10  -9  -2 21.0682 2.84507   2
 -10  -9   2 16.4632 2.69751   5
 -10   9   2 12.2317 3.34755   3
  -9  -9   2 16.1314 2.84232   4
  -9  -9   2 6.77360 2.62173   2
   9  -9  -2 9.92349 2.05279   2
  -9  -9   2 12.2499 2.10067   5
  -9   9   2 8.93704 2.57487   3
  -8  -9   2 9.19277 1.77097   5
  -8  -9   2 4.31315 2.20438   2
   8  -9  -2 9.85779 1.84666   2
  -8  -9   2 10.5840 2.07423   4
  -8   9   2 12.5819 2.53017   3
  -7  -9   2 8.56242 1.60723   5
  -7  -9   2 5.61737 2.27316   2
  -7  -9   2 13.7304 2.30595   4
  -7   9   2 7.82455 2.15643   3
  -6  -9   2 260.314 17.9211   5
   6  -9  -2 242.519 17.8440   2
  -6  -9   2 269.715 18.6680   4
  -6  -9   2 212.304 18.4361   2
  -6   9   2 246.365 18.5946   3
  -5  -9   2 52.5384 3.93605   5
  -5  -9   2 41.4293 4.66212   2
   5  -9  -2 44.4519 3.85711   2
  -5  -9   2 49.6588 4.22421   4
  -5   9   2 43.3631 4.52764   3
  -4  -9   2 45.1563 3.73602   4
   4  -9  -2 38.1842 3.26008   2
  -4   9   2 34.4911 3.86095   3
   3  -9  -2 81.4571 6.66630   4
   3  -9  -2 84.4750 6.44958   2
  -3  -9   2 87.4890 6.82509   4
  -3  -9   2 84.2695 6.91688   2
  -3   9   2 97.5949 7.11989   3
   2  -9  -2 39.6360 3.07188   2
  -2  -9   2 38.7331 3.43903   2
  -2  -9   2 30.5981 3.14545   3
  -2  -9   2 44.3160 3.49906   4
   2  -9  -2 39.0894 3.41700   4
  -2   9   2 39.4529 3.57907   3
   0  -9   2 61.3190 4.95601   4
   0  -9  -2 65.5970 4.78703   2
   0  -9  -2 61.4771 5.02024   4
   0  -9   2 60.9709 4.80015   2
   0   9   2 59.8103 5.07776   3
  -1  -9  -2 37.3958 3.39139   4
   1  -9   2 36.0277 3.22249   4
   1  -9   2 34.6941 3.04351   2
  -1  -9  -2 36.7456 3.23098   2
   1   9   2 40.8258 3.39219   3
  -2  -9  -2 19.0992 2.56590   3
   2  -9   2 25.1503 2.33882   4
  -2  -9  -2 23.4733 2.55012   4
   2  -9   2 24.9219 2.19543   2
  -2  -9  -2 23.6534 2.47965   2
   3  -9   2 518.031 36.4266   2
  -3  -9  -2 509.964 36.7612   2
   3  -9   2 521.187 36.3744   4
  -3  -9  -2 508.547 36.7307   4
  -4  -9  -2 76.9220 6.67948   2
  -4  -9  -2 88.6944 6.62144   4
   4  -9   2 74.5909 6.16509   2
   5  -9   2 118.017 9.51741   2
  -5  -9  -2 126.153 10.1426   2
  -5  -9  -2 137.900 9.96523   4
  -6  -9  -2 62.6320 6.85452   4
  -6  -9  -2 56.9678 5.65679   2
   6  -9   2 61.1706 5.90630   2
   7  -9   2 16.3683 2.33606   2
  -7  -9  -2 14.9729 2.96463   2
  -7  -9  -2 23.4098 2.40006   5
  -7  -9  -2 24.7222 3.27035   4
  -8  -9  -2 5.37118 1.37989   5
  -8  -9  -2 10.1184 2.32538   4
   8  -9   2 6.10826 1.66850   2
   9  -9   2 4.38620 1.59038   2
  -9  -9  -2 3.91548 1.32976   5
  -9  -9  -2 5.61034 2.41790   4
 -10  -9  -2 4.77064 1.47906   5
 -10  -9  -2 3.95840 2.69890   4
  10  -9   2 5.16361 1.66140   2
 -11  -9  -2 12.0949 2.45570   5
 -11  -9  -2 8.45195 3.52092   4
  11  -9   2 13.3801 3.71902   2
 -12  -9  -2 44.5932 4.65445   5
  12  -9   2 44.5776 4.74854   2
 -12  -9  -2 32.4940 5.83588   4
  11 -10  -2 2.90876 1.76820   2
 -11 -10   2 1.87644 1.34611   5
 -11 -10   2 0.55865 2.52123   4
 -10 -10   2 7.28933 1.80085   5
 -10 -10   2 6.27649 2.49643   4
  10 -10  -2 6.06667 1.75737   2
 -10  10   2 0.25096 2.67968   3
  -9 -10   2 2.83382 1.15107   5
   9 -10  -2 4.27071 1.49257   2
  -9 -10   2 3.51173 2.65588   2
  -9 -10   2 6.75386 2.34295   4
  -9  10   2 4.05090 2.42091   3
  -8 -10   2 13.5134 3.29996   2
  -8 -10   2 18.8420 2.33820   5
  -8 -10   2 26.2651 3.32942   4
   8 -10  -2 20.4034 2.57600   2
  -8  10   2 17.1909 3.36628   3
   7 -10  -2 3.08101 1.12882   2
  -7 -10   2 -1.8290 2.00232   2
  -7 -10   2 7.18229 1.91652   4
  -7  10   2 5.14785 2.13068   3
  -6 -10   2 34.0277 3.41838   4
   6 -10  -2 27.0039 2.77453   2
  -6 -10   2 27.5961 2.67940   5
  -6 -10   2 20.7556 3.59912   2
  -6  10   2 32.1708 3.82774   3
  -5 -10   2 176.843 14.5335   2
  -5 -10   2 182.411 14.4639   4
   5 -10  -2 192.335 13.8577   2
  -5  10   2 208.323 14.7412   3
   4 -10  -2 2.65458 0.87667   2
  -4 -10   2 2.62341 1.65770   2
  -4 -10   2 2.99693 1.29023   4
  -4  10   2 -0.7914 1.36896   3
  -3 -10   2 203.171 13.3513   4
   3 -10  -2 183.707 12.8732   2
  -3 -10   2 161.900 13.3204   2
   3 -10  -2 175.626 13.1305   4
  -3  10   2 163.780 13.4730   3
  -2 -10   2 288.745 21.7340   4
   2 -10  -2 287.810 21.6844   4
  -2 -10   2 307.581 21.7909   2
   2 -10  -2 302.481 21.4022   2
  -2  10   2 319.854 22.0639   3
   0 -10   2 12.7792 1.70135   2
   0 -10   2 17.0308 1.91279   4
   0 -10  -2 12.1221 1.62718   2
   0 -10  -2 16.9475 2.07785   4
   0  10   2 8.77886 1.98768   3
   1 -10   2 87.8803 6.73774   4
   1 -10   2 88.5485 6.59308   2
  -1 -10  -2 90.3717 6.76492   2
  -1 -10  -2 93.8242 7.00008   4
   1  10   2 74.7163 6.77502   3
  -2 -10  -2 62.5115 4.87061   4
  -2 -10  -2 54.3505 4.73054   2
   2 -10   2 51.8392 4.44416   4
   2 -10   2 51.5391 4.33196   2
  -3 -10  -2 22.0679 3.06016   2
  -3 -10  -2 24.1414 2.90201   4
   3 -10   2 21.6915 2.26483   2
   3 -10   2 23.0480 2.35844   4
   4 -10   2 68.4898 5.33875   2
  -4 -10  -2 64.0596 5.90695   2
  -4 -10  -2 66.3592 5.77904   4
  -5 -10  -2 145.924 10.8283   4
  -5 -10  -2 124.972 10.7737   2
  -6 -10  -2 9.62243 2.59704   2
   6 -10   2 13.7385 2.05564   2
  -6 -10  -2 16.0933 2.85740   4
  -7 -10  -2 73.7883 7.17381   2
   7 -10   2 73.6216 6.26946   2
  -7 -10  -2 84.0374 7.09809   4
   8 -10   2 18.1821 2.77450   2
  -8 -10  -2 24.1738 2.70716   5
  -8 -10  -2 23.8384 3.83776   4
  -9 -10  -2 20.9226 3.71726   4
  -9 -10  -2 19.1639 2.63275   5
   9 -10   2 15.0238 2.64001   2
 -10 -10  -2 23.4811 3.13529   5
 -10 -10  -2 27.2275 4.56722   4
  10 -10   2 23.2452 3.13731   2
 -11 -10  -2 4.12713 1.70290   5
 -11 -10  -2 8.12065 3.46437   4
  11 -10   2 2.65809 1.60770   2
  11 -11  -2 9.02175 2.32560   2
 -11 -11   2 3.25109 1.54845   5
 -11 -11   2 1.98538 3.22072   4
  10 -11  -2 39.1478 4.05318   2
 -10 -11   2 37.5825 3.92781   5
 -10 -11   2 34.8935 5.16818   4
   9 -11  -2 2.99960 1.50833   2
  -9 -11   2 3.09848 1.26788   5
  -9 -11   2 8.98018 3.01050   2
  -9 -11   2 2.85336 2.24157   4
  -9  11   2 7.56998 3.14136   3
   8 -11  -2 49.5014 4.40821   2
  -8 -11   2 46.2579 5.01489   4
  -8 -11   2 40.4486 5.60619   2
  -8 -11   2 57.2586 4.40366   5
  -8  11   2 35.8900 5.27472   3
  -7 -11   2 100.629 7.50970   4
  -7 -11   2 82.8771 7.90192   2
   7 -11  -2 89.3488 6.84452   2
  -7  11   2 66.4758 7.56807   3
  -6 -11   2 13.0527 3.00507   2
  -6 -11   2 22.8306 2.79115   4
   6 -11  -2 14.9576 2.00311   2
  -6  11   2 11.8512 2.79727   3
  -5 -11   2 24.9051 2.97440   4
   5 -11  -2 22.2299 2.27478   2
  -5  11   2 17.7692 3.11343   3
  -4 -11   2 9.16272 2.30791   2
  -4 -11   2 14.4735 2.33083   4
   4 -11  -2 10.1941 1.53188   2
  -4  11   2 14.8934 2.67064   3
   3 -11  -2 103.418 8.15597   4
   3 -11  -2 102.466 7.71705   2
  -3  11   2 105.573 8.56632   3
   2 -11  -2 77.9602 5.74407   2
  -2 -11   2 76.8347 6.18405   4
  -2 -11   2 71.2439 6.17083   2
   2 -11  -2 79.4311 6.22429   4
  -2  11   2 68.2770 6.42741   3
   1 -11  -2 27.4616 3.06516   4
   0 -11   2 117.114 8.81140   2
   0 -11   2 120.736 8.98228   4
   0 -11  -2 114.543 8.77868   2
   0 -11  -2 133.843 9.20938   4
   0  11   2 100.724 9.08679   3
  -1 -11  -2 47.4316 4.11738   4
   1 -11   2 44.8939 3.59703   2
  -1 -11  -2 36.0749 3.76518   2
   1 -11   2 39.4655 3.76822   4
  -2 -11  -2 12.7795 2.21850   2
  -2 -11  -2 13.9339 2.32304   4
   2 -11   2 14.1153 1.74906   2
   2 -11   2 12.2960 1.86722   4
  -3 -11  -2 41.8621 4.40421   2
   3 -11   2 48.0055 3.88043   2
   4 -11   2 342.505 24.3088   2
  -4 -11  -2 329.405 24.8082   2
  -4 -11  -2 343.569 24.8615   4
  -5 -11  -2 25.6567 3.39087   4
   5 -11   2 25.7381 2.60336   2
  -5 -11  -2 20.9561 3.48811   2
  -6 -11  -2 22.6565 3.67794   2
   6 -11   2 21.0642 2.50373   2
  -6 -11  -2 24.3120 3.42506   4
  -7 -11  -2 7.42558 2.46313   4
   7 -11   2 6.41778 1.61809   2
  -7 -11  -2 3.99070 2.38591   2
  -8 -11  -2 14.6024 3.50615   2
   8 -11   2 20.9401 2.89301   2
  -8 -11  -2 16.8252 3.65940   4
   9 -11   2 48.7222 4.63040   2
  -9 -11  -2 45.7097 6.06242   4
 -10 -11  -2 12.5483 3.71429   4
 -11 -11  -2 69.6101 8.40362   4
 -11 -11  -2 81.2169 6.82186   5
  11 -11   2 73.3635 6.76709   2
 -10 -12   2 3.58436 3.37329   4
 -10 -12   2 4.48471 1.63022   5
  10 -12  -2 8.36645 2.04257   2
  -9 -12   2 16.4052 3.36096   4
   9 -12  -2 13.6367 2.45492   2
  -8 -12   2 58.7239 6.55495   2
  -8 -12   2 62.7566 6.05201   4
   8 -12  -2 59.7054 5.10340   2
  -8  12   2 49.5971 6.22621   3
  -7 -12   2 27.9788 3.77085   4
   7 -12  -2 24.3625 2.80110   2
  -7 -12   2 23.8776 4.28149   2
  -7  12   2 21.3732 4.05641   3
   6 -12  -2 49.2782 4.00103   2
  -6 -12   2 38.9765 5.12999   2
  -6 -12   2 44.4030 4.61684   4
  -6  12   2 44.2387 5.19221   3
   5 -12  -2 7.75290 1.40955   2
  -5 -12   2 9.31486 2.16244   4
  -5 -12   2 2.02068 2.17482   2
  -5  12   2 7.16965 2.59725   3
  -4 -12   2 10.4056 2.47914   2
   4 -12  -2 13.4775 2.06437   2
   4 -12  -2 16.1126 2.50247   4
  -4 -12   2 20.5558 2.73131   4
  -4  12   2 16.0714 2.84336   3
  -3 -12   2 35.8338 4.07524   2
   3 -12  -2 41.2084 4.05588   4
   3 -12  -2 40.6952 3.39534   2
  -3 -12   2 41.7727 4.10133   4
  -3  12   2 36.5809 4.33758   3
  -2 -12   2 8.19649 1.96526   2
  -2 -12   2 9.91998 1.98740   4
   2 -12  -2 10.8565 1.96493   4
   2 -12  -2 8.45608 1.38252   2
  -2  12   2 8.19550 2.21179   3
  -1 -12   2 20.8243 3.11241   4
   1 -12  -2 24.6078 2.35121   2
  -1 -12   2 21.0036 2.58255   2
   1 -12  -2 19.8910 2.84081   4
  -1  12   2 19.4972 3.03361   3
   0 -12   2 52.1950 4.49520   4
   0 -12  -2 51.1125 4.66309   4
   0 -12  -2 45.7474 4.17969   2
   0 -12   2 48.7789 4.40665   2
   1 -12   2 144.474 11.1661   4
  -1 -12  -2 153.082 11.6737   4
   1 -12   2 151.831 11.0616   2
  -1 -12  -2 143.241 11.1508   2
   2 -12   2 74.9889 5.88636   4
  -2 -12  -2 73.9819 6.35527   4
  -2 -12  -2 57.7128 5.98828   2
   2 -12   2 75.6617 5.63609   2
  -3 -12  -2 150.257 12.0529   2
   3 -12   2 159.183 11.4375   2
   3 -12   2 156.211 11.5879   4
  -3 -12  -2 151.136 12.1098   4
  -4 -12  -2 1.95181 1.64356   4
  -4 -12  -2 -0.4737 1.75107   2
   4 -12   2 1.14033 1.24702   4
   4 -12   2 -0.1464 0.85828   2
   5 -12   2 53.5045 4.58569   2
  -5 -12  -2 54.4656 5.71643   2
  -5 -12  -2 56.0202 5.62021   4
   6 -12   2 30.5974 3.09707   2
  -6 -12  -2 33.0149 4.18845   4
  -6 -12  -2 23.8724 4.27155   2
  -7 -12  -2 52.7312 6.28657   2
   7 -12   2 62.0995 5.21783   2
  -7 -12  -2 62.5612 6.38431   4
   8 -12   2 23.4279 3.01918   2
  -8 -12  -2 30.9000 4.57530   4
  -8 -12  -2 22.3722 4.24232   2
  -9 -12  -2 -0.0055 3.08338   4
   9 -12   2 -0.2861 1.30859   2
 -10 -12  -2 19.3256 4.97178   4
  10 -12   2 30.2704 3.65615   2
   9 -13  -2 4.55011 1.54277   2
  -9 -13   2 0.42253 2.88723   2
  -9 -13   2 1.85929 2.61337   4
   8 -13  -2 6.56229 1.65244   2
  -8 -13   2 5.29793 3.33481   2
  -8 -13   2 4.88897 2.77913   4
   7 -13  -2 50.6955 4.41231   2
  -7 -13   2 44.0407 5.66020   2
  -7 -13   2 53.2277 5.35180   4
  -6 -13   2 13.8414 2.88272   4
  -6 -13   2 11.1543 3.13450   2
   6 -13  -2 13.1567 2.02411   2
  -6  13   2 8.44757 2.94261   3
  -5 -13   2 10.5212 2.78958   2
   5 -13  -2 14.0279 1.94713   2
  -5 -13   2 20.1072 3.09833   4
  -5  13   2 12.5139 3.10057   3
  -4 -13   2 44.4703 4.43782   4
  -4 -13   2 43.0160 4.72522   2
   4 -13  -2 46.4275 3.73336   2
  -4  13   2 34.8405 4.70387   3
   3 -13  -2 80.2734 6.15959   2
   3 -13  -2 86.6424 6.96751   4
  -3 -13   2 83.5804 6.85739   4
  -3 -13   2 79.7458 6.86954   2
  -3  13   2 65.7888 7.12412   3
  -2 -13   2 44.6720 4.40503   2
  -2 -13   2 49.4611 4.63389   4
   2 -13  -2 55.7132 4.78196   4
  -2  13   2 38.9066 4.93912   3
  -1 -13   2 20.5896 2.94746   4
  -1 -13   2 16.9259 2.64804   2
   1 -13  -2 17.7422 2.38404   2
   1 -13  -2 21.9829 3.36010   4
   0 -13   2 54.4832 4.94852   4
   0 -13   2 48.7549 4.58837   2
   0 -13  -2 54.3292 5.12418   4
   0 -13  -2 57.3885 4.77531   2
   1 -13   2 13.9393 3.37205   4
   1 -13   2 15.9732 2.13786   2
  -1 -13  -2 12.1141 2.78940   4
  -2 -13  -2 21.7515 3.36374   2
   2 -13   2 26.6717 2.66325   2
  -2 -13  -2 23.6868 3.49236   4
   2 -13   2 26.4701 3.11771   4
  -3 -13  -2 11.3608 2.69600   2
   3 -13   2 14.6721 1.92613   2
  -3 -13  -2 12.3112 2.75575   4
   3 -13   2 12.6951 2.33667   4
   4 -13   2 35.5415 3.25269   2
  -4 -13  -2 30.5171 4.22286   4
   4 -13   2 36.8776 3.63240   4
  -4 -13  -2 25.8321 4.21415   2
  -5 -13  -2 1.01072 2.31197   2
  -5 -13  -2 3.87210 2.26580   4
   5 -13   2 1.72169 1.14007   2
  -6 -13  -2 11.2800 3.36421   2
  -6 -13  -2 14.2064 3.18143   4
   6 -13   2 8.94408 1.86459   2
  -7 -13  -2 6.79840 2.72695   4
  -7 -13  -2 0.82481 2.71946   2
   7 -13   2 1.04616 1.24771   2
  -8 -13  -2 15.2889 3.94034   2
  -8 -13  -2 18.8349 4.07327   4
   8 -13   2 12.3914 2.23905   2
   9 -13   2 72.8964 6.77520   2
  -9 -13  -2 90.3172 8.77390   4
   8 -14  -2 6.99557 1.81154   2
  -8 -14   2 5.17293 3.00400   4
  -8 -14   2 7.37248 3.32717   2
  -7 -14   2 -3.2365 2.91948   2
  -7 -14   2 11.9369 4.18492   4
   7 -14  -2 7.91115 1.67790   2
  -6 -14   2 4.62250 2.78747   2
   6 -14  -2 2.44766 1.40021   2
  -6 -14   2 8.00163 2.52807   4
   5 -14  -2 15.9298 2.09113   2
  -5 -14   2 10.5338 3.04019   2
  -5 -14   2 11.7395 2.87359   4
  -4 -14   2 5.16805 2.32258   2
   4 -14  -2 2.05921 1.17985   2
  -4 -14   2 1.72896 1.80666   4
  -3 -14   2 7.42468 2.15238   4
  -3 -14   2 11.4729 2.57184   2
   3 -14  -2 8.00269 1.54256   2
   3 -14  -2 4.94238 2.52365   4
   2 -14  -2 7.81130 2.45807   4
   2 -14  -2 10.4265 1.72691   2
  -2 -14   2 7.65764 2.24772   2
  -2 -14   2 8.60761 2.33507   4
  -1 -14   2 10.1633 2.27582   4
   1 -14  -2 8.43870 1.76792   2
  -1 -14   2 4.28266 1.72890   2
   1 -14  -2 11.5686 2.70600   4
   0 -14   2 32.6404 3.75929   4
   0 -14   2 26.3450 3.12782   2
   0 -14  -2 33.0436 4.05526   4
   0 -14  -2 24.0702 3.16468   2
  -1 -14  -2 10.8931 2.45739   4
  -1 -14  -2 3.72251 2.00047   2
   1 -14   2 7.03732 2.11900   4
   1 -14   2 7.72067 1.66351   2
  -2 -14  -2 4.20258 2.37783   4
   2 -14   2 4.02629 1.35673   2
  -2 -14  -2 1.64442 1.86113   2
   2 -14   2 6.68426 1.87795   4
  -3 -14  -2 36.0283 4.48310   4
  -3 -14  -2 33.6721 4.21984   2
   3 -14   2 32.3509 3.24711   2
  -4 -14  -2 91.6619 8.77614   2
   4 -14   2 99.5674 7.86507   2
   4 -14   2 102.119 8.31516   4
  -4 -14  -2 111.347 9.07413   4
   5 -14   2 8.67022 1.76453   2
  -5 -14  -2 6.72980 2.96210   2
  -5 -14  -2 13.2021 3.20195   4
  -6 -14  -2 22.4663 4.26805   4
   6 -14   2 16.4147 2.56398   2
  -6 -14  -2 14.6830 3.57811   2
  -7 -14  -2 6.90554 3.24673   2
   7 -14   2 1.25246 1.42670   2
   8 -14   2 40.9035 4.39412   2
  -8 -14  -2 49.0618 6.96408   4
   7 -15  -2 6.95401 1.76515   2
  -7 -15   2 4.50252 3.17980   2
  -7 -15   2 3.57886 2.96726   4
  -6 -15   2 17.6607 6.53461   2
  -6 -15   2 33.8213 4.41511   4
   6 -15  -2 28.3708 3.13315   2
  -5 -15   2 1.25548 2.54323   2
  -5 -15   2 2.71945 2.39040   4
   5 -15  -2 4.33053 1.38763   2
  -4 -15   2 3.50176 2.39930   2
   4 -15  -2 5.32128 2.82862   4
   4 -15  -2 2.41539 1.22701   2
  -4 -15   2 3.72542 2.29161   4
   3 -15  -2 25.0176 3.94535   4
   3 -15  -2 18.5317 2.46895   2
  -3 -15   2 17.5745 3.19540   2
  -3 -15   2 19.6203 3.52117   4
  -2 -15   2 35.3839 4.27335   4
   2 -15  -2 37.8144 3.48522   2
   2 -15  -2 34.6119 5.01118   4
  -2 -15   2 31.6924 4.05830   2
   1 -15  -2 2.62339 2.18043   4
  -1 -15   2 1.42461 2.03575   4
   1 -15  -2 -1.0202 1.34941   2
  -1 -15   2 -2.7813 1.43259   2
   0 -15  -2 11.1514 2.32575   2
   0 -15   2 9.70616 2.17825   2
   0 -15  -2 15.2172 3.25988   4
   0 -15   2 10.2108 2.64681   4
   1 -15   2 53.2384 5.11670   4
  -1 -15  -2 43.1145 4.92054   2
   1 -15   2 54.5092 4.60036   2
  -1 -15  -2 49.4312 5.63943   4
   2 -15   2 2.58377 1.51258   2
  -2 -15  -2 5.69695 2.35715   2
  -2 -15  -2 5.24526 2.72393   4
   2 -15   2 5.63221 2.10003   4
   3 -15   2 8.06627 2.40977   4
   3 -15   2 6.28750 1.70297   2
  -3 -15  -2 6.53925 2.63495   2
  -3 -15  -2 6.41434 3.08452   4
  -4 -15  -2 7.54596 3.07250   4
   4 -15   2 6.53318 2.34608   4
   4 -15   2 5.70667 1.59289   2
  -4 -15  -2 3.87699 2.62150   2
   5 -15   2 0.89497 1.37370   2
  -5 -15  -2 2.37209 3.09501   2
  -5 -15  -2 5.41164 3.42411   4
  -6 -15  -2 0.90978 3.33260   2
  -6 -15  -2 1.20388 2.89837   4
   6 -15   2 1.25248 1.43048   2
   7 -15   2 40.9592 4.32113   2
  -7 -15  -2 47.9218 6.58292   4
  -6 -16   2 7.57774 3.36896   4
   6 -16  -2 10.2931 2.06275   2
  -6 -16   2 11.0022 3.71309   2
  -5 -16   2 5.99535 3.14971   4
   5 -16  -2 5.94639 1.77414   2
  -5 -16   2 4.90369 3.15552   2
   4 -16  -2 23.3346 4.30149   4
   4 -16  -2 30.4760 3.17157   2
  -4 -16   2 23.9536 4.34715   2
   3 -16  -2 6.87738 3.33805   4
   3 -16  -2 5.91832 1.74585   2
  -3 -16   2 5.66808 2.84362   4
  -3 -16   2 7.47299 2.80862   2
  -2 -16   2 5.09467 2.37499   4
   2 -16  -2 3.21413 1.59153   2
  -2 -16   2 0.37042 1.96581   2
   2 -16  -2 4.06879 3.10913   4
   1 -16  -2 20.6431 2.91469   2
  -1 -16   2 15.3303 3.11046   2
  -1 -16   2 20.5980 4.10151   4
   1 -16  -2 21.9667 4.05577   4
   0 -16   2 9.15207 2.17027   2
   0 -16  -2 2.71300 2.80748   4
   0 -16  -2 7.09244 2.13298   2
   0 -16   2 4.20446 2.72544   4
   1 -16   2 9.18600 2.14432   2
   1 -16   2 12.2874 3.05828   4
  -1 -16  -2 9.13045 3.10128   4
  -1 -16  -2 10.9928 2.61368   2
   2 -16   2 20.5982 3.36389   4
  -2 -16  -2 9.19894 2.91674   2
  -2 -16  -2 13.7105 3.59107   4
   2 -16   2 11.1317 2.12045   2
  -3 -16  -2 48.6890 5.82579   2
   3 -16   2 59.5102 4.97882   2
   3 -16   2 50.9560 5.71916   4
  -3 -16  -2 54.8434 6.86678   4
   4 -16   2 35.6132 4.76491   4
   4 -16   2 38.8839 3.82242   2
  -4 -16  -2 31.1782 5.13873   2
  -5 -16  -2 19.2336 4.41560   4
  -5 -16  -2 10.4936 3.71927   2
   6 -16   2 0.78920 1.69336   2
  -6 -16  -2 1.43210 3.62848   4
  -6 -16  -2 6.09864 3.94083   2
  -4 -17   2 5.87003 3.12669   2
   4 -17  -2 -1.7628 3.64999   4
  -4 -17   2 6.54397 2.98311   4
   4 -17  -2 2.54339 1.88496   2
   3 -17  -2 4.11205 1.84210   2
  -3 -17   2 3.72268 2.79279   2
  -3 -17   2 5.71335 3.04490   4
   3 -17  -2 0.65389 3.27846   4
   2 -17  -2 3.35527 3.60174   4
  -2 -17   2 4.79204 3.69286   4
   2 -17  -2 4.55047 2.06515   2
  -1 -17   2 5.22532 2.49050   2
  -1 -17   2 4.94880 2.85884   4
   1 -17  -2 1.12252 4.08154   4
   1 -17  -2 3.81848 2.07781   2
   0 -17   2 10.2133 2.46973   2
   0 -17   2 7.53712 3.81732   4
   0 -17  -2 10.1013 2.50934   2
   0 -17  -2 3.84008 4.16018   4
   1 -17   2 70.0044 5.75665   2
  -1 -17  -2 54.3633 6.04705   2
  -1 -17  -2 62.1953 6.95181   4
   1 -17   2 47.3159 6.45783   4
  -2 -17  -2 13.0690 3.18718   2
   2 -17   2 9.03736 3.38716   4
  -2 -17  -2 6.84495 4.71080   4
  -3 -17  -2 16.9471 4.75175   4
   3 -17   2 19.5569 3.15805   2
  -3 -17  -2 16.1766 3.86166   2
   3 -17   2 15.8877 3.67781   4
   4 -17   2 -4.7115 2.99777   4
  -4 -17  -2 6.21681 5.81049   2
   4 -17   2 2.14109 1.73268   2
  -4 -17  -2 -5.2379 3.24603   4
  -1 -18   2 -1.8828 3.34035   4
   0 -18   2 47.2509 5.13663   2
   0 -18  -2 37.8947 6.53461   4
   0 -18   2 41.8748 5.74495   4
   0 -18  -2 41.6599 5.30739   2
 -11   0   3 0.98624 1.70192   3
 -10   0   3 -1.0477 1.34517   3
  -9   0   3 0.60070 1.17333   3
  -8   0   3 0.26668 1.09957   3
  -6   0   3 -0.1546 0.62693   3
   5   0  -3 0.99325 0.89309   3
  -5   0   3 0.54018 0.62795   3
   4   0  -3 0.58249 0.70652   3
  -4   0   3 1.64736 0.62521   3
   4   0  -3 0.10246 0.73421   2
   3   0  -3 0.99779 0.51503   3
   3   0  -3 0.41578 0.55560   2
  -3   0   3 -0.1994 0.44047   3
  -2   0   3 -0.1069 0.37847   3
  -2   0   3 -0.1339 0.33361   2
   2   0  -3 -0.0101 0.32768   3
   2   0  -3 0.05639 0.34388   2
   1   0  -3 0.15920 0.23325   3
   1   0  -3 0.66410 0.19293   2
  -1   0   3 0.41811 0.20662   2
  -1   0   3 -0.0197 0.22778   3
   0   0  -3 0.58327 0.11287   2
   0   0   3 0.30251 0.09806   2
   0   0   3 0.49517 0.30415   4
   0   0  -3 0.42153 0.22389   3
   0   0   3 0.27223 0.21766   3
   1   0   3 0.19759 0.12938   5
  -1   0  -3 0.04689 0.23923   4
  -1   0  -3 0.21438 0.10070   5
   1   0   3 0.24049 0.32986   4
   2   0   3 0.50953 0.36692   4
  -2   0  -3 0.46219 0.23638   5
  -2   0  -3 0.20383 0.36411   4
  -3   0  -3 0.29914 0.48397   4
   3   0   3 0.09054 0.38609   4
   4   0   3 1.45087 1.03657   3
  -4   0  -3 0.36856 0.52837   4
   4   0   3 0.19419 0.41140   4
   5   0   3 0.36851 0.57489   3
   6   0   3 -44.068 58.5755   1
 -12   1   3 27.2155 4.08541   3
 -11  -1   3 5.81890 1.99200   3
 -11   1   3 4.40782 2.65966   3
 -10  -1   3 52.2647 4.73055   3
 -10   1   3 52.6202 4.98435   3
  -9  -1   3 4.94972 1.42095   3
  -9   1   3 2.64000 1.49057   3
  -8  -1   3 228.494 16.6735   3
  -8   1   3 229.680 16.8351   3
  -7  -1   3 100.160 7.56289   3
  -7   1   3 98.0880 7.68140   3
  -6   1   3 55.4337 4.50712   3
   6   1  -3 53.6410 4.79784   3
  -5  -1   3 71.7004 5.71853   4
  -5  -1   3 80.0442 5.91567   3
   5   1  -3 78.9395 6.08492   3
  -5   1   3 78.3398 6.00117   3
  -4  -1   3 51.2460 5.42915   2
   4  -1  -3 62.1688 4.82363   3
  -4  -1   3 55.9410 4.42576   4
   4  -1  -3 52.1211 4.65320   2
   4   1  -3 61.8709 4.71454   2
  -4   1   3 66.9259 4.73765   3
  -3  -1   3 561.228 36.4005   3
   3  -1  -3 456.098 36.2751   2
  -3  -1   3 446.704 36.3120   2
  -3   1   3 588.762 36.5291   3
   3   1  -3 521.304 36.3691   3
   2  -1  -3 72.6920 5.51579   2
   2  -1  -3 79.0853 5.73794   3
  -2  -1   3 65.1886 5.52956   2
  -2  -1   3 81.9589 5.66365   3
  -2   1   3 87.7840 5.80155   3
   2   1  -3 80.1252 5.64565   3
   2   1  -3 66.7017 5.49120   2
  -2   1   3 71.5766 5.56477   4
   1  -1  -3 510.388 36.1265   3
   1  -1  -3 505.154 36.0838   4
  -1  -1   3 487.754 35.9123   2
  -1  -1   3 490.022 36.0600   3
  -1   1   3 490.881 36.0692   4
  -1   1   3 574.649 36.2129   3
   1   1  -3 547.731 35.8975   2
   1   1  -3 492.904 36.0607   3
   0  -1  -3 1298.74 97.3954   4
   0  -1  -3 1439.04 97.4012   3
   0   1   3 1363.85 97.3977   4
   0   1   3 1461.96 97.4199   3
  -1  -1  -3 3227.52 224.516   4
   1   1   3 3195.60 224.474   4
  -2  -1  -3 676.452 44.7363   4
   2  -1   3 626.070 44.6604   4
  -2  -1  -3 614.875 44.5525   5
   2   1   3 623.406 44.6203   4
  -3  -1  -3 338.490 26.6838   5
  -3  -1  -3 424.231 26.8571   4
   3   1   3 372.267 26.6646   4
  -4  -1  -3 365.640 25.1832   4
   4  -1   3 355.267 25.1349   3
   4   1   3 340.879 25.0130   3
  -5  -1  -3 35.2752 2.86858   4
   5   1   3 29.5820 2.57317   3
   5   1   3 30.2501 2.51668   4
   6   1   3 10.7915 1.29526   4
   6   1   3 12.5157 1.46163   3
 -12   2   3 11.3576 3.10674   3
 -11   2   3 69.1808 6.57706   3
 -10  -2   3 71.1916 5.95477   3
 -10   2   3 73.4110 6.41393   3
  -9  -2   3 160.640 11.8602   3
  -9   2   3 158.241 12.2043   3
  -8  -2   3 22.0097 2.23465   3
  -8   2   3 18.5179 2.50604   3
  -7  -2   3 320.214 22.2666   3
  -7  -2   3 302.573 22.0589   4
  -7   2   3 306.482 22.3860   3
  -6  -2   3 41.2048 3.25602   3
  -6  -2   3 34.8162 3.15464   4
   6   2  -3 39.1032 3.48476   3
  -6   2   3 38.6999 3.43476   3
  -5  -2   3 7.25371 1.05472   3
  -5  -2   3 4.70639 0.85007   4
  -5  -2   3 4.73316 1.38132   2
   5   2  -3 4.13616 1.14866   3
  -5   2   3 7.51141 1.23092   3
  -4  -2   3 324.929 26.5685   2
  -4  -2   3 355.142 26.3410   4
   4   2  -3 392.180 26.5349   3
  -4   2   3 418.856 26.7168   3
  -3  -2   3 75.3880 4.99157   3
   3  -2  -3 63.9155 5.13274   3
  -3  -2   3 58.8603 4.97749   2
  -3  -2   3 55.9547 4.81011   4
  -3   2   3 69.3041 5.09917   3
   3   2  -3 66.3124 4.92041   3
   3   2  -3 64.2012 4.92659   2
   2  -2  -3 154.713 11.8002   4
  -2  -2   3 147.646 11.7964   2
  -2  -2   3 165.567 11.8369   3
   2  -2  -3 162.939 12.0009   3
   2   2  -3 167.006 11.7629   2
   2   2  -3 164.262 11.8250   3
  -2   2   3 192.645 12.0853   3
   1  -2  -3 839.199 64.7412   3
  -1  -2   3 936.741 64.5415   2
   1  -2  -3 873.344 64.6598   4
  -1   2   3 941.980 64.6646   4
  -1   2   3 957.575 64.8147   3
   1   2  -3 982.371 64.5211   2
   0  -2   3 1254.74 91.1958   2
   0  -2  -3 1352.71 91.4223   3
   0  -2  -3 1261.17 91.3988   4
   0   2   3 1315.39 91.3787   4
   0   2   3 1371.34 91.4652   3
   0   2  -3 1274.17 91.2103   2
  -1  -2  -3 742.246 47.4154   3
  -1  -2  -3 690.931 47.4731   4
   1  -2   3 647.798 47.2740   2
  -1  -2  -3 642.051 47.2811   2
   1   2   3 647.473 47.2686   2
   1   2   3 683.919 47.4106   4
   1   2   3 731.290 47.4288   3
  -1   2  -3 585.379 47.2608   2
   1   2   3 704.554 47.3073   5
   2  -2   3 21.0338 1.89849   2
  -2  -2  -3 26.5112 1.94730   5
  -2  -2  -3 25.0458 2.10124   4
   2   2   3 27.0006 1.97442   3
   2   2   3 25.0167 2.04001   2
   2   2   3 21.0707 1.96123   5
   2   2   3 22.6338 1.99640   4
   3  -2   3 248.155 16.7491   3
  -3  -2  -3 231.973 16.6794   4
  -3  -2  -3 223.928 16.5958   5
   3   2   3 244.609 16.9200   2
   3   2   3 217.504 16.5480   4
  -4  -2  -3 296.830 22.1737   5
  -4  -2  -3 325.047 22.0578   4
   4   2   3 299.688 21.8727   4
   4   2   3 313.325 21.8343   3
  -5  -2  -3 29.0725 2.35788   4
   5   2   3 22.6755 1.97666   3
   5   2   3 20.6295 2.01808   4
   6   2   3 47.0189 3.73279   3
  -7  -2  -3 92.3684 7.24035   4
   7   2   3 92.8522 7.04291   3
  -8  -2  -3 139.504 10.6301   4
 -13  -2  -3 32.4314 5.78748   5
 -12   3   3 83.1729 7.93657   3
 -11   3   3 6.16088 2.57837   3
 -10  -3   3 14.8193 2.23993   3
 -10   3   3 19.4775 2.96867   3
  -9  -3   3 42.5729 3.70266   4
  -9  -3   3 38.3509 3.50957   3
  -9   3   3 40.1990 4.09317   3
  -8  -3   3 112.248 8.72970   3
  -8  -3   3 118.885 8.66589   4
  -8   3   3 113.897 9.03286   3
  -7  -3   3 293.752 20.8143   3
  -7  -3   3 283.333 20.8870   4
   7   3  -3 308.315 21.2016   3
  -7   3   3 282.233 21.1796   3
  -6  -3   3 25.1191 2.50972   4
  -6  -3   3 28.7733 2.43739   3
  -6  -3   3 25.1308 2.96953   2
   6   3  -3 37.9777 3.97570   3
  -6   3   3 25.2990 2.69236   3
  -5  -3   3 932.399 73.4087   2
  -5   3   3 1096.61 73.4003   3
   5   3  -3 1092.20 73.2053   3
  -4  -3   3 81.0250 6.57203   4
  -4  -3   3 104.199 6.66828   3
  -4  -3   3 71.5208 6.73603   2
   4   3  -3 89.4998 6.60582   3
  -4   3   3 94.4694 6.85503   3
  -3  -3   3 18.3538 2.15830   2
  -3  -3   3 22.6046 1.91289   3
  -3  -3   3 20.0375 1.93402   4
   3  -3  -3 24.2973 2.33540   3
  -3   3   3 23.5627 2.32772   3
   3   3  -3 22.3104 1.96121   2
  -2  -3   3 115.784 8.77396   2
  -2  -3   3 124.276 8.76664   3
   2  -3  -3 106.463 8.93618   3
  -2  -3   3 108.518 8.72961   4
   2   3  -3 141.189 8.74038   2
  -2   3   3 114.885 8.91584   3
  -2   3   3 131.774 8.70851   4
   1  -3  -3 85.2874 6.22880   2
  -1  -3   3 80.0751 6.25166   5
  -1  -3   3 102.308 6.39642   2
   1  -3  -3 89.4946 6.49162   4
   1  -3  -3 78.4024 6.57787   3
  -1   3   3 83.1900 6.59296   3
  -1   3   3 97.1072 6.45391   4
   0  -3  -3 384.940 25.1765   2
   0  -3  -3 349.852 25.4201   4
   0  -3  -3 318.449 25.4256   3
   0  -3   3 365.121 25.2460   2
   0   3   3 368.888 25.1511   2
   0   3   3 370.567 25.3786   4
   0   3  -3 370.370 25.2695   2
   0   3   3 343.082 25.4708   3
  -1  -3  -3 163.806 12.5459   2
  -1  -3  -3 180.563 12.6615   3
  -1  -3  -3 173.698 12.7130   4
   1  -3   3 172.739 12.5451   2
   1   3   3 183.525 12.7051   3
   1   3   3 176.420 12.5024   2
   1   3   3 199.790 12.6838   5
  -1   3  -3 165.284 12.5549   2
   1   3   3 176.601 12.7525   4
  -2  -3  -3 12.1232 1.28748   2
   2  -3   3 12.4338 1.16610   2
  -2  -3  -3 14.4593 1.19024   5
   2  -3   3 13.0705 1.38758   3
  -2  -3  -3 12.9126 1.36588   4
   2   3   3 11.8781 1.20368   5
   2   3   3 11.7754 1.23279   2
   2   3   3 11.3238 1.25607   4
   2   3   3 14.8273 1.23777   3
  -3  -3  -3 297.160 21.9579   4
  -3  -3  -3 314.468 21.9025   5
   3  -3   3 334.056 22.0981   3
   3   3   3 289.195 21.8569   4
   3   3   3 308.475 22.0100   2
  -4  -3  -3 110.784 8.31716   5
  -4  -3  -3 113.732 8.36217   4
  -5  -3  -3 257.598 19.1802   5
  -5  -3  -3 275.115 19.1867   4
  -6  -3  -3 61.5048 5.11713   5
  -6  -3  -3 67.1837 5.18804   4
   6   3   3 61.6052 4.76721   3
  -7  -3  -3 63.2551 5.12511   4
  -7  -3  -3 57.8264 5.05471   5
  -8  -3  -3 151.296 10.8046   4
  -8  -3  -3 130.685 10.7339   5
  -9  -3  -3 38.2389 4.03303   5
  -9  -3  -3 46.2217 4.39228   4
 -10  -3  -3 9.23389 2.30131   4
 -10  -3  -3 6.12379 1.62963   5
 -11  -3  -3 4.05774 1.58671   5
 -12  -3  -3 23.1423 3.20809   5
 -13  -3  -3 16.3515 2.91151   5
 -12   4   3 14.7386 3.51822   3
 -11  -4   3 6.80459 1.95468   4
 -11   4   3 8.27455 2.74724   3
 -10  -4   3 37.1009 3.66599   4
 -10   4   3 35.5577 4.23018   3
  -9  -4   3 22.0721 2.66718   4
  -9   4   3 25.7267 4.32440   3
  -8  -4   3 255.410 17.5883   4
  -8   4   3 227.218 17.8531   3
  -7  -4   3 50.3399 4.10063   4
  -7   4   3 46.0761 4.30828   3
  -6  -4   3 123.858 8.92749   4
  -6  -4   3 113.274 9.33656   2
  -6   4   3 119.793 9.15257   3
  -5  -4   3 110.812 9.35020   2
  -5  -4   3 124.282 9.06813   4
  -5   4   3 130.221 9.31414   3
  -4  -4   3 484.602 37.8027   2
  -4  -4   3 527.809 37.5904   4
  -4   4   3 583.848 37.8843   3
  -3  -4   3 247.444 17.6893   4
  -3  -4   3 240.458 17.4690   3
  -3  -4   3 220.200 17.6346   2
  -3   4   3 273.788 17.8037   3
   2  -4  -3 237.969 17.1667   2
  -2  -4   3 241.548 17.3697   4
  -2  -4   3 258.934 17.4519   2
   2  -4  -3 215.733 17.5718   3
  -2  -4   3 212.984 17.1929   5
   2  -4  -3 241.651 17.3460   4
  -2   4   3 269.918 17.2588   4
  -2   4   3 269.253 17.6003   3
  -1  -4   3 241.986 16.1878   5
  -1  -4   3 257.866 16.3428   2
   1  -4  -3 233.096 16.4293   4
   1  -4  -3 230.129 16.1724   2
   1  -4  -3 222.365 16.6078   3
  -1  -4   3 225.395 16.4007   4
  -1   4   3 226.007 16.5387   3
  -1   4   3 202.492 16.1785   2
  -1   4   3 230.300 16.3345   4
   0  -4  -3 100.169 8.16240   3
   0  -4  -3 109.282 8.10795   4
   0  -4  -3 121.316 7.87056   2
   0  -4   3 114.107 7.93715   2
   0   4   3 112.456 7.84248   2
   0   4   3 97.3381 8.11084   3
   0   4   3 109.260 8.02766   4
   0   4  -3 111.877 7.81726   5
   0   4  -3 116.444 7.97211   2
  -1  -4  -3 98.1312 6.98333   3
  -1  -4  -3 88.6225 6.85458   2
  -1  -4  -3 94.7129 7.01185   4
   1  -4   3 97.9518 6.85277   2
   1   4   3 95.6131 6.94962   4
  -1   4  -3 94.0159 6.86981   2
   1   4   3 92.7908 6.97501   3
  -2  -4  -3 112.383 8.70810   4
   2  -4   3 121.607 8.71278   2
  -2  -4  -3 110.953 8.64996   2
   2  -4   3 123.714 8.79278   3
   2   4   3 125.447 8.61434   3
   2   4   3 125.770 8.59789   2
   2   4   3 110.396 8.62209   4
   3  -4   3 411.392 29.7309   2
  -3  -4  -3 396.445 29.8511   2
  -3  -4  -3 459.160 29.7874   5
   3   4   3 414.949 29.8103   2
  -4  -4  -3 22.5649 2.09211   5
  -4  -4  -3 22.0120 2.23189   4
   4  -4   3 24.3024 2.12897   2
  -5  -4  -3 388.984 27.9344   5
  -5  -4  -3 393.989 27.9474   4
  -6  -4  -3 21.4965 2.35931   4
  -6  -4  -3 19.9135 2.17221   5
  -7  -4  -3 20.4115 2.49090   4
  -7  -4  -3 17.1573 2.12367   5
  -8  -4  -3 22.3263 2.75763   4
  -8  -4  -3 13.7756 2.25829   5
  -9  -4  -3 36.7077 3.73815   4
  -9  -4  -3 28.8604 3.40213   5
 -10  -4  -3 17.8846 2.86266   5
 -10  -4  -3 23.0332 3.17196   4
 -11  -4  -3 17.5703 2.93810   5
 -11  -4  -3 23.7089 3.47791   4
 -12  -4  -3 36.7080 4.19745   5
 -13  -4  -3 12.0637 2.58028   5
 -12  -5   3 0.17793 2.25153   4
 -12   5   3 1.33962 2.61223   3
 -11  -5   3 81.8587 6.45273   4
 -11   5   3 61.5911 6.99263   3
 -10  -5   3 35.7118 3.68594   4
 -10   5   3 30.6444 4.12855   3
  -9  -5   3 13.5059 2.26168   4
  -9   5   3 11.6125 2.33673   3
  -8  -5   3 11.3622 2.03582   4
  -8   5   3 9.88530 2.12937   3
  -7  -5   3 29.3688 3.89018   2
  -7  -5   3 39.3536 3.43828   4
  -7   5   3 36.5729 3.55307   3
  -6  -5   3 42.2753 3.52490   4
  -6  -5   3 41.0750 4.03588   2
  -6   5   3 35.0857 3.58802   3
  -5  -5   3 89.7191 6.60109   4
  -5  -5   3 77.2536 6.86256   2
  -5   5   3 88.4714 6.81419   3
  -4  -5   3 231.315 16.5532   4
  -4  -5   3 212.503 16.7588   2
  -4   5   3 244.705 16.7980   3
  -3  -5   3 55.3497 4.26371   4
  -3  -5   3 53.7814 4.11381   3
  -3  -5   3 46.1604 4.06268   5
  -3  -5   3 54.2321 4.40136   2
   3  -5  -3 52.3329 4.02779   2
  -3   5   3 63.0003 4.51266   3
   2  -5  -3 135.398 9.86241   4
  -2  -5   3 139.288 9.91319   2
   2  -5  -3 131.212 9.65429   2
  -2  -5   3 135.029 9.69076   5
  -2  -5   3 134.449 9.89407   4
  -2   5   3 135.639 9.80215   4
  -2   5   3 137.439 10.0502   3
   1  -5  -3 99.6679 8.19020   3
  -1  -5   3 110.388 7.99146   4
   1  -5  -3 110.733 7.72533   2
  -1  -5   3 120.261 7.90886   2
   1  -5  -3 112.944 8.00927   4
  -1   5   3 101.366 8.04897   3
  -1   5   3 109.080 7.87907   4
  -1   5   3 101.708 7.74568   2
   0  -5  -3 436.172 28.2359   2
   0  -5   3 447.315 28.4229   2
   0  -5   3 391.868 28.4123   4
   0  -5  -3 395.991 28.4637   4
   0  -5  -3 340.530 28.7464   3
   0   5   3 386.080 28.3685   4
   0   5  -3 420.124 28.1830   5
   0   5   3 407.566 28.2110   2
   0   5   3 350.044 28.4240   3
   0   5  -3 438.205 28.5207   2
  -1  -5  -3 194.542 14.1962   2
   1  -5   3 196.560 14.2511   4
  -1  -5  -3 195.749 14.3300   3
  -1  -5  -3 193.843 14.3477   4
   1  -5   3 201.022 14.1746   2
   1  -5   3 203.514 14.3984   3
   1   5   3 221.933 14.1028   2
   1   5   3 184.104 14.2462   3
   2  -5   3 108.709 8.28855   4
   2  -5   3 116.563 8.30170   2
  -2  -5  -3 111.867 8.39467   2
  -2  -5  -3 112.552 8.45966   4
  -2  -5  -3 113.569 8.27992   3
   2   5   3 105.458 8.23825   3
   2   5   3 129.632 8.28948   2
  -3  -5  -3 224.687 14.1845   5
  -3  -5  -3 183.797 14.2526   4
   3  -5   3 191.477 14.1307   2
  -3  -5  -3 185.490 14.5106   2
  -4  -5  -3 34.4082 3.21578   4
  -4  -5  -3 42.8869 3.12966   5
   4  -5   3 37.3660 3.06472   2
  -4  -5  -3 30.7006 3.24482   2
  -5  -5  -3 296.458 21.8922   4
  -5  -5  -3 318.901 21.8571   5
   5  -5   3 296.971 21.8010   2
  -6  -5  -3 118.496 9.16737   4
  -6  -5  -3 121.157 9.10437   5
  -7  -5  -3 26.5522 2.76902   5
  -7  -5  -3 25.8239 2.99843   4
  -8  -5  -3 23.6301 2.67918   5
  -8  -5  -3 21.5382 2.95755   4
  -9  -5  -3 48.0226 4.57650   5
  -9  -5  -3 50.3965 4.93559   4
 -10  -5  -3 0.97332 1.02137   5
 -10  -5  -3 -0.3500 2.00207   4
 -11  -5  -3 10.8492 2.17501   5
 -12  -5  -3 56.6221 6.23485   4
 -12  -5  -3 46.9584 5.04011   5
 -13  -5  -3 7.22900 2.04365   5
 -13  -6   3 1.51853 1.74982   5
 -13  -6   3 -0.3035 2.99319   4
 -12  -6   3 12.9786 2.64650   5
 -12  -6   3 16.9527 3.20198   4
 -12   6   3 11.6551 3.54014   3
 -11  -6   3 9.36420 2.33752   4
 -11  -6   3 3.94842 1.54254   5
 -11   6   3 5.52259 2.67260   3
 -10  -6   3 2.25848 1.31814   5
 -10   6   3 1.94950 1.75104   3
  -9  -6   3 19.3164 2.76840   4
  -9   6   3 18.5225 3.12332   3
  -8  -6   3 42.8332 3.75611   4
  -8  -6   3 39.4570 4.42925   2
  -8   6   3 31.7874 3.85507   3
  -7  -6   3 69.5275 6.26615   2
  -7  -6   3 62.2632 5.54409   5
  -7  -6   3 75.4979 5.69397   4
  -7   6   3 65.7113 5.84873   3
  -6  -6   3 129.569 10.4544   2
  -6  -6   3 147.830 10.0155   4
  -6  -6   3 113.618 9.86186   5
  -6   6   3 138.905 10.2383   3
  -5  -6   3 95.7880 7.49363   2
   5  -6  -3 87.9947 6.86482   2
  -5  -6   3 80.0875 6.94359   5
  -5  -6   3 100.826 7.10534   4
  -5   6   3 96.4463 7.29461   3
  -4  -6   3 97.7673 7.06720   2
  -4  -6   3 87.9695 6.73630   4
   4  -6  -3 92.0098 6.54942   2
  -4  -6   3 74.6205 6.55149   5
  -4   6   3 90.7955 6.93694   3
  -3  -6   3 499.315 36.2777   2
  -3  -6   3 519.726 36.1600   4
  -3  -6   3 494.152 36.0047   3
  -3  -6   3 482.924 35.9631   5
  -3   6   3 558.510 36.3889   3
  -2  -6   3 99.0495 7.47599   2
   2  -6  -3 100.254 7.45717   4
   2  -6  -3 97.1315 7.21047   2
  -2  -6   3 101.752 7.48621   4
  -2  -6   3 107.343 7.25043   5
  -2   6   3 98.3219 7.61906   3
  -2   6   3 95.9694 7.29572   4
  -1  -6   3 6.55213 1.07203   4
   1  -6  -3 6.96809 1.07228   4
  -1  -6   3 3.80667 0.84652   3
  -1  -6   3 6.68649 0.89991   2
   1  -6  -3 6.62275 0.67757   2
  -1   6   3 5.98477 0.74823   2
  -1   6   3 5.69473 0.90227   4
   1   6  -3 5.51957 0.76750   5
  -1   6   3 4.92704 0.97113   3
   0  -6  -3 53.0922 3.54665   2
   0  -6   3 51.2975 3.97024   4
   0  -6   3 38.8092 3.71568   3
   0  -6   3 48.7026 3.60165   2
   0  -6  -3 38.9889 3.88830   3
   0   6   3 47.2033 3.51220   2
   0   6  -3 48.8242 3.47525   5
  -1  -6  -3 23.8312 2.30954   4
   1  -6   3 26.2890 2.09876   2
  -1  -6  -3 26.5537 2.15656   2
   1  -6   3 25.2152 2.24739   4
  -1  -6  -3 22.5559 2.35818   3
   1   6   3 28.0896 2.03771   2
   1   6   3 22.1102 2.17516   3
   2  -6   3 25.9191 2.20719   4
  -2  -6  -3 25.7586 2.38930   4
   2  -6   3 24.1937 2.09876   2
  -2  -6  -3 24.2150 2.16784   3
  -2  -6  -3 22.6387 2.37988   2
   2   6   3 28.0571 2.10225   2
   2   6   3 22.7140 2.06515   3
  -3  -6  -3 60.9928 4.97877   2
   3  -6   3 61.3761 4.69233   4
  -3  -6  -3 63.9957 5.00354   4
   3  -6   3 61.6583 4.76584   2
  -4  -6  -3 87.6440 7.21961   4
  -4  -6  -3 82.6428 7.24723   2
  -4  -6  -3 105.109 7.10733   5
   4  -6   3 98.4754 7.08943   2
  -5  -6  -3 198.874 15.9802   2
   5  -6   3 217.401 15.7666   2
  -5  -6  -3 234.202 15.7927   5
  -5  -6  -3 216.102 15.9036   4
  -6  -6  -3 140.185 10.5534   4
  -6  -6  -3 143.436 10.4399   5
   6  -6   3 132.706 10.3884   2
   7  -6   3 36.0582 3.53143   2
  -7  -6  -3 38.0141 3.50616   5
  -7  -6  -3 38.4896 3.82951   4
  -8  -6  -3 26.3134 2.86878   5
   8  -6   3 22.8751 2.72489   2
  -8  -6  -3 24.9220 3.24847   4
  -9  -6  -3 0.20109 1.85437   4
  -9  -6  -3 1.70752 1.16729   5
 -10  -6  -3 29.5503 3.59648   5
 -10  -6  -3 40.2672 5.00001   4
 -11  -6  -3 14.3501 3.30994   4
 -11  -6  -3 10.7074 2.30467   5
 -12  -6  -3 -0.5025 3.04394   4
 -12  -6  -3 2.19837 1.65800   5
 -13  -6  -3 1.96272 1.53965   5
 -13  -6  -3 -1.8820 3.80601   4
 -13  -7   3 2.96584 1.80059   5
 -12  -7   3 16.2521 3.03575   5
 -12  -7   3 22.0714 3.67350   4
 -12   7   3 15.7273 4.28689   3
 -11  -7   3 12.4287 2.71115   4
 -11  -7   3 5.82882 1.84816   5
 -11   7   3 8.00031 2.94313   3
 -10  -7   3 31.3590 3.59515   4
 -10  -7   3 25.4854 3.26090   5
 -10   7   3 26.8735 3.82009   3
  -9  -7   3 53.0787 4.78308   4
  -9  -7   3 41.8114 4.25929   5
  -9   7   3 43.9987 4.90494   3
  -8  -7   3 1.55774 1.90185   2
  -8  -7   3 3.36700 1.25781   5
  -8  -7   3 6.25230 1.70056   4
  -8   7   3 2.37240 1.63049   3
  -7  -7   3 1.70324 1.88424   2
  -7  -7   3 1.04021 0.91111   5
   7  -7  -3 1.00724 0.88939   2
  -7  -7   3 2.08619 1.26211   4
  -7   7   3 1.28101 1.19446   3
  -6  -7   3 12.2085 1.86355   5
   6  -7  -3 14.1415 1.72146   2
  -6  -7   3 18.2868 2.12537   4
  -6  -7   3 11.7650 2.48926   2
  -6   7   3 13.9596 2.18998   3
  -5  -7   3 47.5737 4.60785   2
   5  -7  -3 51.6795 3.98382   2
  -5  -7   3 50.2766 4.19889   4
  -5  -7   3 47.0054 4.04328   5
  -5   7   3 49.8453 4.39776   3
   4  -7  -3 183.575 13.1842   2
  -4  -7   3 187.231 13.4192   4
  -4  -7   3 181.855 13.2316   5
  -4  -7   3 172.511 13.6465   2
  -4   7   3 189.098 13.6273   3
  -3  -7   3 94.3993 6.88809   4
   3  -7  -3 85.1394 6.55300   2
   3  -7  -3 81.0574 6.74201   4
  -3  -7   3 101.800 7.04555   2
  -3   7   3 99.9296 7.07847   3
  -3   7   3 80.4685 6.55943   4
  -2  -7   3 22.1706 1.99712   4
   2  -7  -3 19.4503 1.63051   2
  -2  -7   3 17.9338 1.92593   2
   2  -7  -3 18.0582 1.98484   4
  -2  -7   3 13.9082 1.99142   3
  -2   7   3 21.1755 2.08196   3
   1  -7  -3 43.4514 3.46366   4
  -1  -7   3 45.3856 3.31996   2
   1  -7  -3 45.3536 3.16809   2
  -1  -7   3 42.3352 3.44271   4
  -1   7   3 36.1214 3.15497   2
  -1   7   3 38.5623 3.45705   3
   1   7  -3 36.2888 3.24254   5
   0  -7  -3 42.3547 3.01389   2
   0  -7  -3 33.9674 3.47698   3
   0  -7   3 41.1456 3.04678   2
   0  -7   3 36.4774 3.17758   4
   0  -7  -3 38.0750 3.28797   4
   0   7  -3 37.4302 2.89925   5
   0   7   3 35.7908 2.94121   2
  -1  -7  -3 531.364 37.1861   4
   1  -7   3 554.878 36.9536   2
  -1  -7  -3 517.324 37.1896   2
  -1  -7  -3 477.397 37.1567   3
   1  -7   3 560.524 37.0437   4
   1   7   3 502.480 36.9766   3
  -2  -7  -3 53.7279 4.49394   2
  -2  -7  -3 57.5317 4.58670   4
  -2  -7  -3 60.5790 4.47527   3
   2  -7   3 54.6903 4.31884   2
   2   7   3 54.4807 4.26914   3
   3  -7   3 58.9891 4.60186   4
   3  -7   3 59.9975 4.67751   2
  -3  -7  -3 62.7161 4.93668   4
  -3  -7  -3 58.6295 4.95119   2
   4  -7   3 37.3748 3.02495   2
  -4  -7  -3 27.7647 3.23490   2
  -4  -7  -3 35.9409 3.28352   4
  -5  -7  -3 44.0922 4.23420   4
   5  -7   3 49.8274 4.05500   2
  -5  -7  -3 43.1597 4.43393   2
  -5  -7  -3 54.8992 4.08194   5
  -6  -7  -3 9.86933 1.91631   4
   6  -7   3 6.98551 1.48363   2
  -6  -7  -3 9.30744 1.42369   5
  -6  -7  -3 3.53908 1.70826   2
  -7  -7  -3 8.36833 1.87620   4
  -8  -7  -3 28.8347 2.95528   5
   8  -7   3 21.5456 2.79203   2
  -8  -7  -3 24.6904 3.41221   4
  -9  -7  -3 21.2758 2.74192   5
   9  -7   3 20.5398 2.66261   2
  -9  -7  -3 21.8742 3.49169   4
 -10  -7  -3 -0.1065 2.27572   4
  10  -7   3 1.76687 1.46587   2
 -10  -7  -3 1.97672 1.06762   5
  11  -7   3 9.16033 2.23872   2
 -11  -7  -3 9.01249 2.11538   5
 -11  -7  -3 15.0429 3.45158   4
 -12  -7  -3 -5.3000 3.19565   4
  12  -7   3 -1.2128 1.54859   2
 -12  -7  -3 4.70868 1.77154   5
 -12  -8   3 9.45759 2.65399   5
 -12  -8   3 6.14858 2.96980   4
  12  -8  -3 9.51290 3.86735   2
 -11  -8   3 46.2980 4.86433   4
  11  -8  -3 39.1292 3.95753   2
 -11  -8   3 36.6509 4.14280   5
 -11   8   3 26.2682 4.89854   3
 -10  -8   3 17.6346 2.76722   5
  10  -8  -3 17.0258 2.66958   2
 -10  -8   3 23.8377 3.35503   4
 -10   8   3 15.2654 3.30595   3
  -9  -8   3 94.3843 7.33803   4
  -9  -8   3 88.0880 7.08279   5
   9  -8  -3 86.2967 6.93977   2
  -9   8   3 71.4073 7.55539   3
  -8  -8   3 17.2092 2.59670   4
   8  -8  -3 12.2589 1.92144   2
  -8  -8   3 9.30912 2.65001   2
  -8  -8   3 12.5144 2.14321   5
  -8   8   3 11.0617 2.26750   3
  -7  -8   3 84.8459 6.70051   4
   7  -8  -3 86.8989 6.47079   2
  -7  -8   3 78.0645 7.21639   2
  -7  -8   3 78.6648 6.50646   5
  -7   8   3 77.0552 6.95104   3
  -6  -8   3 6.22699 1.99638   2
  -6  -8   3 3.35906 1.10543   5
  -6  -8   3 7.30860 1.68375   4
  -5  -8   3 25.7011 3.04452   2
   5  -8  -3 27.3478 2.36881   2
  -5  -8   3 21.6150 2.31661   5
  -5  -8   3 25.8305 2.68898   4
  -5   8   3 25.7154 2.80802   3
  -4  -8   3 19.0487 1.84212   5
  -3  -8   3 222.934 15.3650   4
  -3  -8   3 198.659 15.4361   2
   3  -8  -3 204.005 15.5109   4
   3  -8  -3 208.788 15.0332   2
  -3   8   3 217.164 15.5128   3
   2  -8  -3 4.46676 0.68989   2
  -2  -8   3 2.72755 0.78156   3
   2  -8  -3 5.88128 1.11127   4
  -2  -8   3 3.72589 0.95559   2
  -2  -8   3 4.57464 1.04087   4
  -2   8   3 3.30507 0.97120   3
  -1  -8   3 165.956 11.6524   2
   1  -8  -3 152.733 11.7560   4
  -1  -8   3 155.910 11.7134   4
   1  -8  -3 164.969 11.4486   2
  -1   8   3 185.550 11.8885   3
   1   8  -3 136.445 11.4754   5
   0  -8  -3 22.8190 2.48670   4
   0  -8  -3 25.2365 2.15542   2
   0  -8   3 26.1437 2.19116   2
   0  -8   3 24.4490 2.37209   4
   0   8  -3 23.1428 2.02876   5
   0   8   3 26.7123 2.43215   3
  -1  -8  -3 15.9258 2.24581   3
   1  -8   3 15.7954 1.64675   2
  -1  -8  -3 18.8524 2.09512   4
  -1  -8  -3 16.5860 1.80379   2
   1  -8   3 16.7830 1.90794   4
   1   8   3 20.2922 1.85146   3
   2  -8   3 117.518 8.73854   2
   2  -8   3 120.565 8.77795   4
  -2  -8  -3 118.313 8.94012   2
  -2  -8  -3 112.005 9.00691   4
  -2  -8  -3 127.390 9.54659   3
   2   8   3 118.718 8.69232   3
  -3  -8  -3 10.6272 1.77974   4
  -3  -8  -3 7.67420 1.67339   2
   3  -8   3 8.90353 1.30912   4
   3  -8   3 8.87462 1.24670   2
  -4  -8  -3 573.876 39.3634   4
   4  -8   3 559.866 39.0602   2
  -4  -8  -3 518.866 39.3272   2
  -5  -8  -3 87.0986 7.67335   2
   5  -8   3 102.242 7.33033   2
  -5  -8  -3 91.7711 7.56697   4
  -6  -8  -3 81.3899 7.05752   4
  -6  -8  -3 93.4602 6.71714   5
   6  -8   3 81.4705 6.66779   2
  -6  -8  -3 79.8137 7.22883   2
  -7  -8  -3 64.4163 5.90852   4
  -7  -8  -3 61.0360 5.20805   5
   7  -8   3 61.6414 5.24147   2
  -8  -8  -3 61.1449 5.25842   5
   8  -8   3 57.7474 5.27348   2
  -8  -8  -3 64.2985 6.03361   4
  -9  -8  -3 14.8620 3.20642   4
   9  -8   3 15.3722 2.44800   2
  -9  -8  -3 15.3463 2.39013   5
  10  -8   3 0.10744 1.18635   2
 -10  -8  -3 -0.2422 2.57020   4
 -10  -8  -3 -2.3285 0.90189   5
 -11  -8  -3 -3.0033 3.16551   4
  11  -8   3 0.29503 1.49992   2
 -11  -8  -3 1.05886 1.26112   5
  12  -8   3 47.9122 4.97663   2
 -12  -8  -3 49.5180 4.90482   5
 -12  -8  -3 34.6887 5.65719   4
 -12  -9   3 23.8248 4.07139   4
 -12  -9   3 21.4850 3.42080   5
  12  -9  -3 29.2267 3.59535   2
 -11  -9   3 46.6417 5.19625   4
 -11  -9   3 38.9022 4.49290   5
  11  -9  -3 51.7054 4.62663   2
 -11   9   3 37.2356 6.50228   3
 -10  -9   3 3.31718 2.19262   4
 -10  -9   3 1.57167 1.16654   5
  10  -9  -3 3.56682 1.49502   2
 -10   9   3 4.72022 2.47330   3
   9  -9  -3 28.7155 3.23296   2
  -9  -9   3 35.0872 3.88606   4
  -9  -9   3 24.2321 4.24524   2
  -9  -9   3 32.6219 3.24097   5
  -9   9   3 20.8121 3.64673   3
  -8  -9   3 70.5494 5.82375   5
   8  -9  -3 70.1346 5.76896   2
  -8  -9   3 78.7687 6.24183   4
  -8   9   3 58.5083 6.23246   3
  -7  -9   3 19.4540 2.20709   5
  -7  -9   3 18.5508 2.69780   4
   7  -9  -3 18.2896 2.17516   2
  -7  -9   3 15.4631 2.97984   2
  -7   9   3 17.1835 2.87011   3
   6  -9  -3 152.178 10.8146   2
  -6  -9   3 131.490 11.5043   2
  -6  -9   3 150.028 10.8482   5
  -6   9   3 145.142 11.4539   3
   5  -9  -3 108.028 8.09617   2
  -5  -9   3 114.264 8.46190   4
  -5  -9   3 96.6957 8.83613   2
  -5  -9   3 118.948 8.16301   5
  -5   9   3 98.8937 8.63295   3
  -4  -9   3 349.877 27.5548   2
  -4  -9   3 393.781 27.3823   4
   4  -9  -3 375.703 27.0239   2
  -4   9   3 403.803 27.6506   3
  -3  -9   3 3.64527 0.84312   3
  -3  -9   3 6.29944 1.26963   4
   3  -9  -3 3.41275 1.23361   4
  -3   9   3 2.74166 1.18303   3
  -2  -9   3 2.16757 0.96748   3
   2  -9  -3 5.58348 1.31175   4
   2  -9  -3 5.35029 0.87483   2
  -2  -9   3 6.23747 1.27501   2
  -2   9   3 5.68341 1.31309   3
  -1  -9   3 84.1581 6.26553   4
   1  -9  -3 79.4286 5.92705   2
  -1  -9   3 81.4475 6.15505   2
   1  -9  -3 72.9158 6.26641   4
  -1   9   3 81.1033 6.35397   3
   0  -9   3 88.4047 6.85238   4
   0  -9   3 90.9371 6.70922   2
   0  -9  -3 82.0116 6.93692   4
   0  -9  -3 91.7128 6.66506   2
   0   9  -3 83.6990 6.54160   5
   0   9   3 98.1523 6.96391   3
  -1  -9  -3 62.2517 4.97490   2
   1  -9   3 64.3835 4.99113   4
  -1  -9  -3 59.6275 5.16542   4
   1  -9   3 62.1510 4.83177   2
   1   9   3 63.7721 4.97894   3
  -2  -9  -3 14.9676 2.00969   4
  -2  -9  -3 8.61403 1.74017   3
   2  -9   3 11.7219 1.41582   2
  -2  -9  -3 10.7054 1.75858   2
   2  -9   3 14.5159 1.66492   4
   2   9   3 10.6301 1.54771   3
  -3  -9  -3 263.313 19.8593   2
   3  -9   3 270.480 19.5450   2
  -3  -9  -3 273.637 19.9066   4
   3  -9   3 281.005 19.5097   4
   4  -9   3 9.95875 1.60060   2
  -4  -9  -3 13.0954 2.08856   4
  -4  -9  -3 7.32310 2.03328   2
  -5  -9  -3 86.1998 8.02820   2
  -5  -9  -3 106.920 8.03554   4
   5  -9   3 99.4643 7.58713   2
   6  -9   3 52.9235 4.56279   2
  -6  -9  -3 52.4731 6.56582   4
  -6  -9  -3 52.7274 5.23101   2
   7  -9   3 34.8732 3.64811   2
  -7  -9  -3 36.1676 4.54773   2
  -7  -9  -3 42.8392 3.70390   5
  -7  -9  -3 41.5079 4.56429   4
   8  -9   3 20.2689 2.68643   2
  -8  -9  -3 23.1003 3.69044   4
  -8  -9  -3 22.1409 2.59854   5
   9  -9   3 18.7029 2.98437   2
  -9  -9  -3 28.4607 2.98516   5
  -9  -9  -3 23.4487 4.03476   4
 -10  -9  -3 5.08420 1.54327   5
  10  -9   3 5.95919 1.88963   2
 -10  -9  -3 2.69696 2.79035   4
 -11  -9  -3 12.6316 4.09463   4
 -11  -9  -3 9.61052 2.87898   5
  11  -9   3 10.4294 2.98454   2
  12  -9   3 17.9677 3.03303   2
 -12  -9  -3 8.69795 4.38042   4
 -12  -9  -3 16.2884 2.92177   5
  11 -10  -3 7.36406 1.96302   2
 -11 -10   3 4.46986 2.64014   4
 -11 -10   3 6.09446 1.72057   5
 -11  10   3 0.38441 2.80162   3
 -10 -10   3 47.9846 5.38079   4
 -10 -10   3 47.5909 4.54716   5
  10 -10  -3 45.7354 4.55132   2
   9 -10  -3 66.3474 5.71978   2
  -9 -10   3 73.6800 5.86316   5
  -9 -10   3 75.1009 6.43464   4
  -9  10   3 53.2923 6.53847   3
  -8 -10   3 78.1165 7.95477   2
  -8 -10   3 85.7324 6.97691   5
  -8 -10   3 97.1954 7.59432   4
   8 -10  -3 84.7574 6.92413   2
   7 -10  -3 16.2361 2.08343   2
  -7 -10   3 12.9529 2.82156   2
  -7  10   3 14.8498 2.77352   3
  -6 -10   3 16.9469 3.24841   2
   6 -10  -3 19.3592 2.15304   2
  -6 -10   3 18.4331 2.59629   4
  -6 -10   3 21.2157 2.11267   5
  -6  10   3 15.3930 2.77414   3
   5 -10  -3 17.3982 2.00714   2
  -5  10   3 20.0789 2.88303   3
   4 -10  -3 46.5292 3.77226   2
  -4 -10   3 52.6909 4.37647   4
   4 -10  -3 39.7490 4.16787   4
  -4 -10   3 44.2167 5.27426   2
  -4  10   3 51.0065 4.61848   3
  -3 -10   3 610.876 45.9914   2
   3 -10  -3 651.185 45.5136   2
   3 -10  -3 625.711 45.8467   4
  -3 -10   3 667.430 45.9347   4
  -3  10   3 676.874 46.1732   3
   2 -10  -3 163.342 11.9874   2
  -2 -10   3 157.684 12.3542   2
   2 -10  -3 169.962 12.4098   4
  -2 -10   3 165.372 12.3818   4
  -2  10   3 176.019 12.5926   3
   1 -10  -3 5.55177 1.06392   2
  -1 -10   3 9.01786 1.58487   2
   1 -10  -3 8.74513 1.67116   4
  -1 -10   3 6.74601 1.43318   4
  -1  10   3 7.71895 1.58806   3
   0 -10   3 170.027 12.2496   4
   0 -10  -3 160.679 12.3916   4
   0 -10  -3 168.066 12.0730   2
   0 -10   3 171.316 12.1237   2
   0  10   3 157.576 12.2885   3
  -1 -10  -3 113.618 8.64720   4
   1 -10   3 113.273 8.22033   2
  -1 -10  -3 106.672 8.35181   2
   1 -10   3 111.413 8.35567   4
   1  10   3 105.729 8.39594   3
   2 -10   3 16.4949 1.79568   2
  -2 -10  -3 18.0369 2.40898   4
   2 -10   3 17.5094 2.05171   4
  -2 -10  -3 19.4543 2.45202   2
  -2 -10  -3 10.8878 2.20780   3
   2  10   3 13.0886 2.29656   3
  -3 -10  -3 27.7098 3.25977   2
  -3 -10  -3 27.0194 3.28566   4
   3 -10   3 26.3070 2.63325   2
   3 -10   3 29.8799 2.70242   4
   4 -10   3 416.977 30.3628   2
  -4 -10  -3 421.411 30.8245   2
  -4 -10  -3 439.536 30.8503   4
  -5 -10  -3 77.9300 6.17048   4
   5 -10   3 60.8532 5.34197   2
  -5 -10  -3 60.5996 5.95874   2
  -6 -10  -3 14.3893 2.57201   4
   6 -10   3 8.66341 1.74185   2
  -6 -10  -3 6.78918 2.48283   2
  -7 -10  -3 10.4068 2.69322   4
  -7 -10  -3 4.58622 2.48997   2
   7 -10   3 9.34005 1.86142   2
  -8 -10  -3 15.1160 3.25876   4
   8 -10   3 12.3839 2.32084   2
  -9 -10  -3 117.165 8.91889   5
   9 -10   3 101.713 8.82988   2
  -9 -10  -3 113.354 9.90871   4
 -10 -10  -3 2.24649 3.13100   4
 -10 -10  -3 4.99312 1.71988   5
  10 -10   3 4.17397 1.73940   2
 -11 -10  -3 8.70730 2.10536   5
  11 -10   3 5.25580 1.99484   2
 -11 -10  -3 3.26528 3.82520   4
  11 -11  -3 1.41021 1.68227   2
 -11 -11   3 4.55923 2.92068   4
 -11 -11   3 3.30792 1.49320   5
  10 -11  -3 9.65666 2.07708   2
 -10 -11   3 9.43273 2.00230   5
 -10 -11   3 6.87911 2.99268   4
 -10  11   3 8.01791 3.14001   3
  -9 -11   3 15.1986 3.89120   2
   9 -11  -3 21.6681 2.74224   2
  -9 -11   3 27.9184 4.03639   4
  -9 -11   3 22.7410 2.74110   5
  -9  11   3 15.3785 3.75938   3
  -8 -11   3 18.8857 2.30353   5
   8 -11  -3 22.0699 2.56908   2
  -8 -11   3 16.1421 3.06417   4
  -8 -11   3 9.25441 3.15268   2
  -8  11   3 17.3039 3.23516   3
   7 -11  -3 37.6687 3.67229   2
  -7 -11   3 35.1991 4.90444   2
  -7 -11   3 41.6762 3.67163   5
  -7 -11   3 43.2563 4.32946   4
  -7  11   3 38.6545 4.70501   3
  -6 -11   3 78.3022 6.19674   4
  -6 -11   3 64.4913 6.63926   2
   6 -11  -3 70.9602 5.88504   2
  -6  11   3 66.0739 6.53905   3
  -5 -11   3 25.7366 2.99416   4
  -5 -11   3 21.2392 3.60796   2
   5 -11  -3 24.9120 2.43313   2
  -5  11   3 22.3401 3.34701   3
  -4 -11   3 16.2401 2.52883   4
   4 -11  -3 16.1984 1.84191   2
  -4 -11   3 16.4477 2.86338   2
   4 -11  -3 17.4095 2.50218   4
  -4  11   3 17.6483 2.79558   3
  -3 -11   3 32.9689 3.35285   2
   3 -11  -3 28.9222 2.51708   2
   3 -11  -3 21.0503 3.18696   4
  -3  11   3 28.6893 3.35578   3
   2 -11  -3 41.0813 3.67016   2
  -2 -11   3 54.4576 4.30014   4
   2 -11  -3 44.5159 4.27889   4
  -2 -11   3 49.0507 4.49571   2
  -2  11   3 42.1178 4.34360   3
  -1 -11   3 23.9837 2.67038   2
   1 -11  -3 28.4709 3.08777   4
   1 -11  -3 25.2738 2.33746   2
  -1  11   3 17.6777 2.91929   3
   0 -11   3 318.220 22.8484   4
   0 -11  -3 324.824 23.0595   4
   0 -11   3 331.874 22.7239   2
   0 -11  -3 317.837 22.6520   2
   0  11   3 289.367 22.9287   3
  -1 -11  -3 19.9419 2.65203   2
  -1 -11  -3 24.1771 2.99110   4
   1 -11   3 25.1164 2.43036   2
   1 -11   3 22.1637 2.64195   4
   1  11   3 26.2974 2.77992   3
   2 -11   3 70.6613 5.51541   4
  -2 -11  -3 57.9570 5.70173   2
   2 -11   3 71.9502 5.39858   2
  -2 -11  -3 67.9941 5.93694   4
   3 -11   3 174.294 12.1074   2
  -3 -11  -3 146.888 12.0713   2
  -3 -11  -3 146.499 13.4824   4
   3 -11   3 160.451 11.6834   4
  -4 -11  -3 3.88547 2.05983   2
   4 -11   3 3.02631 1.26333   4
   4 -11   3 3.44044 1.14699   2
  -4 -11  -3 7.33169 2.00162   4
  -5 -11  -3 12.4883 2.75433   4
  -5 -11  -3 8.61644 2.59996   2
   5 -11   3 7.22363 1.60239   2
   6 -11   3 7.87685 1.67569   2
  -6 -11  -3 11.0076 2.73980   4
  -6 -11  -3 8.72980 2.87692   2
  -7 -11  -3 2.47355 2.47648   2
  -7 -11  -3 1.58111 2.27942   4
   7 -11   3 1.59230 1.15954   2
   8 -11   3 44.5667 4.33494   2
  -8 -11  -3 47.1885 5.72537   4
  -9 -11  -3 3.24242 3.06663   4
   9 -11   3 3.09214 1.61748   2
 -10 -11  -3 30.8639 5.14166   4
  10 -11   3 28.2804 3.95555   2
 -11 -11  -3 8.52554 4.55706   4
  11 -11   3 15.5556 2.84822   2
  10 -12  -3 11.6809 2.32746   2
 -10 -12   3 6.10638 3.52571   2
 -10 -12   3 13.0037 2.27340   5
 -10 -12   3 9.39708 3.32502   4
  -9 -12   3 8.27568 3.56040   2
   9 -12  -3 17.5456 2.45923   2
  -9 -12   3 18.8551 3.39814   4
  -9  12   3 13.0379 3.48929   3
  -8 -12   3 81.9330 7.19292   4
   8 -12  -3 81.2293 6.33710   2
  -8  12   3 64.9946 7.39667   3
  -7 -12   3 2.49455 2.41834   2
  -7 -12   3 6.42404 2.07938   4
   7 -12  -3 6.61949 1.56412   2
  -7  12   3 6.43615 2.71070   3
   6 -12  -3 11.7543 1.95602   2
  -6 -12   3 21.6107 2.93016   4
  -6 -12   3 15.2323 3.25476   2
  -6  12   3 16.0238 3.26380   3
   5 -12  -3 6.65113 1.47163   2
  -5 -12   3 13.6475 2.45623   4
  -5 -12   3 6.96994 2.66276   2
  -5  12   3 6.61756 2.27986   3
  -4 -12   3 5.25722 2.23084   2
   4 -12  -3 8.98826 1.41888   2
  -4 -12   3 11.6475 2.13111   4
  -4  12   3 6.89641 2.29630   3
   3 -12  -3 25.9212 3.22224   4
  -3 -12   3 19.4545 2.86926   4
   3 -12  -3 22.5384 2.25262   2
  -3 -12   3 24.9062 3.34478   2
  -3  12   3 22.2330 3.30373   3
   2 -12  -3 22.7920 3.10404   4
  -2 -12   3 18.8548 2.87821   2
  -2 -12   3 22.8959 2.77514   4
   2 -12  -3 22.3494 2.18855   2
  -2  12   3 18.7849 3.14968   3
   1 -12  -3 56.1903 4.93089   4
   1 -12  -3 51.4153 4.24544   2
  -1 -12   3 53.9252 4.59378   2
  -1  12   3 44.9974 4.90599   3
   0 -12  -3 26.5190 2.81049   2
   0 -12  -3 29.2471 3.40302   4
   0 -12   3 27.0102 2.84001   2
   0 -12   3 28.9658 3.05008   4
   0  12   3 22.8787 3.42671   3
  -1 -12  -3 71.3379 5.78917   2
   1 -12   3 76.5108 5.57820   2
   1 -12   3 70.9779 5.76469   4
   1  12   3 56.0798 5.80134   3
   2 -12   3 72.5674 5.57584   2
  -2 -12  -3 68.9543 6.28891   4
  -2 -12  -3 64.8317 6.03157   2
   2 -12   3 69.5169 5.69342   4
   3 -12   3 172.382 12.1639   4
  -3 -12  -3 146.663 12.4985   2
  -3 -12  -3 163.935 12.8295   4
   3 -12   3 166.014 12.0542   2
   4 -12   3 27.7461 2.71527   2
  -4 -12  -3 29.2186 3.89715   2
  -4 -12  -3 25.2124 3.60652   4
  -5 -12  -3 17.1954 3.18824   4
  -5 -12  -3 15.1873 3.24217   2
   5 -12   3 11.5583 1.91103   2
  -6 -12  -3 13.3615 3.48474   2
  -6 -12  -3 25.1931 3.81726   4
   6 -12   3 15.7578 2.24046   2
   7 -12   3 34.9592 3.78616   2
  -7 -12  -3 45.2262 5.37618   2
  -7 -12  -3 46.0801 5.46401   4
  -8 -12  -3 28.0467 4.99028   4
   8 -12   3 24.9792 3.13044   2
   9 -12   3 -1.6436 1.35383   2
  -9 -12  -3 -0.5833 3.35265   4
  10 -12   3 30.1537 3.76887   2
 -10 -12  -3 31.5224 5.63334   4
  -9 -13   3 77.0417 8.71393   4
   9 -13  -3 101.864 7.55474   2
  -8 -13   3 7.70255 2.96120   4
   8 -13  -3 10.2293 2.02083   2
  -8  13   3 3.76942 3.00546   3
  -7 -13   3 2.31759 2.64658   2
  -7 -13   3 6.73868 2.02611   4
   7 -13  -3 3.87106 1.29247   2
  -7  13   3 10.9526 3.00147   3
  -6 -13   3 4.64701 2.59736   2
   6 -13  -3 5.88475 1.44453   2
  -6 -13   3 11.7663 2.58858   4
  -6  13   3 6.71307 2.58615   3
  -5 -13   3 0.15539 2.19104   2
  -5 -13   3 2.68163 1.62583   4
   5 -13  -3 -0.6956 0.89733   2
  -5  13   3 0.02040 2.20861   3
  -4 -13   3 8.80730 2.41217   2
   4 -13  -3 9.91154 2.40193   4
  -4 -13   3 11.3110 2.35998   4
   4 -13  -3 8.44375 1.41267   2
  -4  13   3 14.4167 2.89974   3
   3 -13  -3 54.7209 5.37550   4
  -3 -13   3 58.4872 4.99896   4
  -3 -13   3 49.2768 5.04750   2
  -3  13   3 43.5137 5.29192   3
   2 -13  -3 38.2832 3.45496   2
  -2 -13   3 37.1989 3.96463   4
   2 -13  -3 45.0993 4.50313   4
  -2 -13   3 41.9481 4.13709   2
  -2  13   3 38.6232 4.47738   3
  -1 -13   3 3.51912 1.47391   2
   1 -13  -3 4.10106 1.28077   2
  -1 -13   3 4.75269 1.67087   4
  -1  13   3 3.33920 2.34414   3
   0 -13  -3 40.0521 3.82158   2
   0 -13  -3 46.1279 4.46765   4
   0 -13   3 40.3293 4.06938   4
   0 -13   3 41.1468 3.83007   2
   1 -13   3 29.4410 2.97622   2
  -1 -13  -3 28.6930 3.87683   4
  -1 -13  -3 28.0858 3.33192   2
  -2 -13  -3 61.3462 6.16163   4
   2 -13   3 68.3926 5.66628   4
   2 -13   3 65.3392 5.34715   2
   3 -13   3 47.5629 4.45683   4
  -3 -13  -3 42.5537 4.82624   2
  -3 -13  -3 51.5549 5.28008   4
   3 -13   3 48.6421 4.15324   2
  -4 -13  -3 39.1834 4.76145   4
   4 -13   3 38.5873 3.56937   2
   4 -13   3 37.1884 3.77722   4
  -4 -13  -3 36.0536 4.72355   2
   5 -13   3 12.4133 2.01448   2
  -5 -13  -3 13.8665 3.41820   4
  -5 -13  -3 8.58632 3.01390   2
   6 -13   3 32.8379 3.26577   2
  -6 -13  -3 27.9356 4.66195   4
  -6 -13  -3 24.1123 4.25127   2
   7 -13   3 13.7319 2.39738   2
  -7 -13  -3 17.0704 3.57888   4
  -7 -13  -3 11.4284 3.60169   2
  -8 -13  -3 17.4428 3.95439   2
   8 -13   3 15.1774 2.54596   2
  -8 -13  -3 14.9038 5.06146   4
   9 -13   3 93.0169 7.80212   2
  -9 -13  -3 94.3263 10.4856   4
  -8 -14   3 5.68678 3.06754   2
   8 -14  -3 5.21021 1.64436   2
  -8 -14   3 3.15088 2.92290   4
   7 -14  -3 48.0067 4.34415   2
  -6 -14   3 12.0280 3.14335   2
   6 -14  -3 14.4755 2.15960   2
  -6 -14   3 19.7962 3.33006   4
  -6  14   3 13.8756 3.71318   3
   5 -14  -3 2.65867 1.22013   2
  -5 -14   3 1.08462 2.02697   2
  -5 -14   3 2.63273 1.91910   4
  -5  14   3 4.79419 2.74189   3
  -4 -14   3 7.98740 2.40053   4
   4 -14  -3 8.27373 1.45623   2
   4 -14  -3 5.77723 2.82198   4
  -4 -14   3 6.54954 2.50503   2
  -4  14   3 4.66912 2.81126   3
   3 -14  -3 5.46504 1.45522   2
  -3 -14   3 7.83965 2.09164   4
  -3 -14   3 6.75795 2.13304   2
  -3  14   3 4.45844 2.67718   3
  -2 -14   3 8.44341 2.12916   2
   2 -14  -3 14.1787 2.94292   4
  -2 -14   3 13.6663 2.57362   4
   2 -14  -3 11.7009 1.83666   2
  -2  14   3 3.14660 2.52217   3
  -1 -14   3 27.0246 3.35585   4
   1 -14  -3 20.3582 2.52805   2
  -1 -14   3 20.7015 3.04585   2
   1 -14  -3 18.6116 3.53952   4
   0 -14   3 43.0765 4.43881   4
   0 -14  -3 40.5749 4.11765   2
   0 -14   3 42.6115 4.09429   2
   0 -14  -3 48.7868 5.10994   4
   1 -14   3 47.1910 4.62512   4
   1 -14   3 47.8211 4.16379   2
  -1 -14  -3 38.1328 4.39706   2
  -1 -14  -3 49.0996 5.08388   4
  -2 -14  -3 4.74146 2.65095   4
  -2 -14  -3 3.29040 2.09301   2
   2 -14   3 2.89762 1.68765   4
   2 -14   3 3.15144 1.35527   2
  -3 -14  -3 3.49650 2.30183   2
   3 -14   3 4.53032 1.39339   2
  -3 -14  -3 6.35085 2.52763   4
   4 -14   3 65.1364 5.52005   2
  -4 -14  -3 67.3261 6.70087   2
   4 -14   3 66.7258 5.92566   4
  -4 -14  -3 67.3819 6.75428   4
   5 -14   3 39.8246 3.74842   2
  -5 -14  -3 36.6754 5.12410   2
  -5 -14  -3 34.8666 5.58830   4
  -6 -14  -3 0.52410 2.84640   2
  -6 -14  -3 5.68846 3.62418   4
   6 -14   3 4.38788 1.55273   2
   7 -14   3 3.58282 1.44717   2
  -7 -14  -3 -0.3222 3.17839   2
   8 -14   3 34.5041 4.05445   2
  -8 -14  -3 44.5638 6.54787   4
  -7 -15   3 -2.9128 2.82227   2
   7 -15  -3 6.25762 1.71514   2
  -7 -15   3 5.07120 2.51659   4
  -6 -15   3 9.15405 3.98446   2
  -6 -15   3 17.6647 3.47620   4
   6 -15  -3 16.6282 2.29114   2
   5 -15  -3 10.4243 1.85144   2
  -5 -15   3 12.0627 3.04353   4
  -5 -15   3 9.87799 2.90177   2
   4 -15  -3 4.30807 1.36979   2
  -4 -15   3 4.24617 2.39565   2
   4 -15  -3 9.21064 3.31426   4
  -4 -15   3 4.82398 2.28126   4
  -3 -15   3 25.2869 3.68858   4
  -3 -15   3 18.0510 3.43582   2
   3 -15  -3 27.5855 4.16696   4
   3 -15  -3 25.7097 2.74319   2
   2 -15  -3 9.81147 3.16471   4
   2 -15  -3 6.63350 1.78880   2
  -2 -15   3 8.80655 2.41086   4
  -2 -15   3 2.33588 2.00791   2
   1 -15  -3 2.01720 2.58306   4
  -1 -15   3 -0.5173 1.62875   2
   1 -15  -3 -1.9780 1.42444   2
  -1 -15   3 1.05715 1.98087   4
   0 -15  -3 16.4485 2.75733   2
   0 -15   3 14.1361 2.57602   2
   0 -15  -3 18.6328 3.54774   4
   0 -15   3 22.9128 3.47801   4
  -1 -15  -3 84.5276 7.72709   2
   1 -15   3 93.8865 7.40114   2
   1 -15   3 90.2910 7.81076   4
  -1 -15  -3 97.3650 8.45105   4
  -2 -15  -3 0.36103 2.47186   4
   2 -15   3 0.85930 1.91881   4
  -2 -15  -3 -0.8252 2.15253   2
   2 -15   3 -1.2712 1.32161   2
   3 -15   3 23.2977 3.37649   4
  -3 -15  -3 20.3406 4.04742   4
   3 -15   3 19.9979 2.60108   2
  -3 -15  -3 14.5551 3.40882   2
  -4 -15  -3 17.7811 3.76688   2
   4 -15   3 18.8396 3.41607   4
   4 -15   3 14.8056 2.26063   2
  -4 -15  -3 13.3048 3.81394   4
  -5 -15  -3 7.50918 3.45377   2
  -5 -15  -3 10.9157 3.78217   4
   5 -15   3 11.4932 2.04947   2
  -6 -15  -3 -2.1788 3.25710   2
   6 -15   3 3.07880 2.68163   2
  -6 -15  -3 2.46350 3.88210   4
   7 -15   3 60.6198 5.39909   2
  -7 -15  -3 50.6988 10.2223   2
  -7 -15  -3 58.1955 7.61344   4
  -6 -16   3 2.18591 3.11136   4
   6 -16  -3 10.6782 2.06821   2
  -6 -16   3 14.2435 3.59030   2
  -5 -16   3 33.7554 5.11003   4
  -5 -16   3 26.5541 4.74707   2
   5 -16  -3 36.1831 3.52492   2
   4 -16  -3 -0.3763 3.10116   4
   4 -16  -3 0.59513 1.53799   2
  -4 -16   3 -0.8532 2.24007   4
   3 -16  -3 -1.8215 2.85386   4
  -3 -16   3 1.82091 2.49550   4
   3 -16  -3 2.71371 1.39408   2
  -3 -16   3 2.32879 2.34198   2
   2 -16  -3 0.97601 1.54547   2
  -2 -16   3 0.01152 1.91605   4
   2 -16  -3 0.52137 2.75175   4
  -2 -16   3 0.72407 2.02031   2
  -1 -16   3 11.1721 2.90347   4
   1 -16  -3 10.5819 2.08519   2
   1 -16  -3 11.3539 3.90911   4
  -1 -16   3 5.92325 2.15027   2
   0 -16  -3 64.9743 6.13339   2
   0 -16  -3 70.7912 7.26779   4
   0 -16   3 67.8990 6.53062   4
   0 -16   3 74.0788 6.13628   2
   1 -16   3 0.94974 2.14565   4
   1 -16   3 2.87419 1.62771   2
  -1 -16  -3 0.98620 2.79596   4
  -1 -16  -3 6.35945 2.40591   2
  -2 -16  -3 5.96571 2.74475   2
   2 -16   3 8.90812 1.97676   2
   2 -16   3 6.50162 2.49320   4
  -2 -16  -3 7.21842 3.78184   4
   3 -16   3 28.9704 3.33173   2
   3 -16   3 27.3812 4.35718   4
  -3 -16  -3 25.7635 4.77556   4
  -3 -16  -3 24.5532 4.30997   2
  -4 -16  -3 58.8359 7.34544   4
   4 -16   3 51.4995 5.79460   4
   4 -16   3 63.1541 5.43438   2
  -4 -16  -3 58.0316 6.67088   2
   5 -16   3 28.9704 3.39505   2
  -5 -16  -3 17.7113 4.68026   2
  -5 -16  -3 33.7965 5.52472   4
   6 -16   3 -2.2889 1.60019   2
  -6 -16  -3 0.88213 3.79609   4
  -4 -17   3 2.30306 3.09979   4
  -4 -17   3 1.01632 2.77322   2
   4 -17  -3 -2.9205 3.94674   4
   4 -17  -3 1.61104 1.78890   2
   3 -17  -3 11.4017 3.96844   4
   3 -17  -3 13.4265 2.47236   2
  -3 -17   3 12.3748 3.56903   4
  -3 -17   3 13.1232 3.28508   2
   2 -17  -3 12.5876 2.54726   2
  -2 -17   3 7.59355 2.95560   2
   2 -17  -3 10.6156 3.91226   4
  -2 -17   3 11.0227 3.47153   4
   1 -17  -3 6.35763 4.06580   4
  -1 -17   3 0.93122 2.64397   2
  -1 -17   3 0.08535 3.32528   4
   1 -17  -3 -0.5723 2.10583   2
   0 -17   3 56.0372 6.05691   4
   0 -17  -3 57.2393 7.05959   4
   0 -17  -3 53.3704 5.67456   2
   1 -17   3 13.1611 4.44405   2
  -1 -17  -3 26.6642 4.01401   2
   1 -17   3 31.9202 4.53849   4
  -1 -17  -3 18.6724 4.68035   4
   2 -17   3 7.97793 3.44003   4
  -2 -17  -3 8.69725 3.03853   2
   2 -17   3 7.99836 2.12793   2
  -2 -17  -3 -3.3797 4.99550   4
   3 -17   3 8.47464 3.09547   4
   3 -17   3 8.79048 2.29891   2
  -3 -17  -3 6.51324 4.16921   4
  -3 -17  -3 6.40293 3.45729   2
   4 -17   3 8.25832 3.51620   4
  -4 -17  -3 7.79782 4.12834   4
   4 -17   3 10.4190 2.23819   2
  -4 -17  -3 9.64139 4.00441   2
 -12   0   4 55.4039 5.57339   3
 -11   0   4 21.1973 3.11833   3
 -10   0   4 153.341 11.7300   3
  -9   0   4 108.851 8.51111   3
  -8   0   4 615.685 43.7655   3
  -7   0   4 155.561 11.6352   3
  -6   0   4 164.813 12.2041   3
  -5   0   4 528.944 37.5977   3
   4   0  -4 21.1528 2.23956   3
  -4   0   4 28.2974 2.38149   3
   4   0  -4 19.4848 2.17293   2
   3   0  -4 262.214 19.9174   3
  -3   0   4 275.752 19.2158   2
   3   0  -4 268.001 19.1574   2
  -2   0   4 1139.59 86.6202   2
   2   0  -4 1304.38 86.8860   3
  -2   0   4 1429.39 86.9599   3
   2   0  -4 1080.17 86.5645   2
   1   0  -4 9069.77 710.820   1
  -1   0   4 9999.99 732.969   1
   0   0  -4 3988.62 311.052   1
   0   0   4 3979.83 324.337   1
   1   0   4 46.7752 3.73505   4
   1   0   4 45.2796 3.42814   5
  -1   0  -4 50.0779 3.79559   4
  -2   0  -4 880.122 58.4430   4
   2   0   4 817.417 58.3304   4
  -2   0  -4 792.551 58.1176   5
   3   0   4 596.932 44.1643   4
  -3   0  -4 658.445 44.3559   4
   4   0   4 5.78725 0.96038   4
  -4   0  -4 8.44293 1.30709   4
  -5   0  -4 58.7202 4.24707   4
   5   0   4 43.8435 3.79840   4
   6   0   4 91.2468 60.2266   1
 -12  -1   4 77.3886 7.10829   3
 -12   1   4 84.4679 7.47428   3
 -11  -1   4 62.2751 5.76728   3
 -11   1   4 67.5004 6.01497   3
 -10  -1   4 10.2346 2.12553   3
 -10   1   4 11.4135 2.37107   3
  -9  -1   4 78.2792 6.35674   3
  -9   1   4 80.6819 6.62207   3
  -8  -1   4 29.9597 2.85092   3
  -8   1   4 24.6361 2.92465   3
  -7  -1   4 426.419 30.1919   3
  -7   1   4 418.465 30.2976   3
  -6  -1   4 11.8188 1.53578   4
  -6  -1   4 15.4839 1.73339   3
  -6   1   4 12.8535 1.78300   3
  -5  -1   4 4.64501 1.01537   3
  -5  -1   4 3.03014 0.75806   4
  -5   1   4 2.27999 0.92634   3
   5   1  -4 2.44587 1.01560   3
   4  -1  -4 177.435 14.6839   2
   4  -1  -4 195.179 14.9136   3
  -4  -1   4 228.536 14.8925   3
   4   1  -4 217.999 14.8740   3
   4   1  -4 171.069 14.7804   2
  -4   1   4 235.428 15.3414   3
   3  -1  -4 230.085 17.6836   2
  -3  -1   4 280.600 17.9433   3
   3  -1  -4 253.807 17.9617   3
  -3  -1   4 227.191 17.7396   2
   3   1  -4 272.187 17.9101   3
   3   1  -4 227.000 17.6840   2
   2  -1  -4 2070.34 141.246   3
  -2  -1   4 2210.03 141.223   3
  -2  -1   4 1806.73 140.983   2
   2  -1  -4 1867.31 140.923   2
   2   1  -4 1974.48 140.944   2
  -2   1   4 2005.30 141.129   4
   2   1  -4 2179.98 141.213   3
  -1  -1   4 878.080 63.8299   3
  -1  -1   4 874.785 63.5922   2
   1  -1  -4 902.805 63.8712   4
   1  -1  -4 912.217 63.8948   3
   1   1  -4 920.594 63.8477   3
  -1   1   4 879.657 63.8500   4
  -1   1   4 949.749 63.9490   3
   1   1  -4 952.463 63.5689   2
   0  -1  -4 77.7764 5.89107   4
   0  -1   4 74.5881 5.53362   2
   0  -1  -4 85.4218 5.86532   3
   0   1  -4 73.9194 5.54411   2
   0   1   4 79.8577 5.85066   3
   0   1   4 76.8222 5.86316   4
   1   1   4 5428.51 379.324   4
  -2  -1  -4 148.083 10.2809   4
  -2  -1  -4 141.807 9.98174   5
   2  -1   4 133.056 10.1714   4
   2   1   4 135.774 10.1453   4
  -3  -1  -4 331.730 22.6759   4
   3  -1   4 306.584 22.5083   4
  -3  -1  -4 303.383 22.4305   5
  -3   1  -4 325.726 22.6359   4
  -4  -1  -4 6.69594 1.17127   4
  -4  -1  -4 5.68280 1.02928   5
   4  -1   4 5.30961 0.98014   3
   4   1   4 5.69068 0.90814   4
  -5  -1  -4 2.19189 0.91173   4
   5   1   4 2.24706 0.65094   4
   5   1   4 2.09780 0.75454   3
   6   1   4 17.9659 1.89503   3
  -7  -1  -4 2.10383 1.32710   4
 -13   2   4 3.64139 2.87528   3
 -12   2   4 11.9819 2.80216   3
 -11  -2   4 37.7181 3.95708   3
 -11   2   4 40.1529 4.58635   3
 -10  -2   4 30.6454 3.17348   3
 -10   2   4 30.0725 4.47714   3
  -9  -2   4 101.982 7.81292   3
  -9   2   4 100.184 8.15498   3
  -8  -2   4 27.4962 2.57177   3
  -8  -2   4 22.8354 2.52314   4
  -8   2   4 23.8114 2.79773   3
  -7  -2   4 40.1712 3.33606   3
  -7  -2   4 32.2692 3.10856   4
  -7   2   4 35.9116 3.41980   3
  -6  -2   4 59.9721 4.69296   3
   6   2  -4 55.1225 4.85976   3
  -6   2   4 55.2624 4.80600   3
  -5  -2   4 15.6799 2.05834   2
  -5  -2   4 14.1232 1.70709   4
  -5  -2   4 17.9836 1.89083   3
   5   2  -4 18.4621 2.03053   3
  -5   2   4 17.0491 1.93999   3
  -4  -2   4 44.0140 4.05795   4
  -4  -2   4 60.8481 4.33540   3
  -4  -2   4 45.1315 4.27556   2
  -4   2   4 64.1595 4.50761   3
   4   2  -4 53.2221 4.27247   3
   3  -2  -4 110.061 8.52364   3
  -3  -2   4 94.9268 8.27793   2
  -3  -2   4 123.944 8.40439   3
   3   2  -4 114.545 8.35786   3
  -3   2   4 131.539 8.63604   3
   3   2  -4 102.513 8.21087   2
  -2  -2   4 351.943 27.1938   2
   2  -2  -4 358.042 27.4314   3
   2  -2  -4 382.258 27.3107   4
  -2  -2   4 387.961 27.3210   3
   2   2  -4 420.761 27.1683   2
  -2   2   4 399.752 27.3087   4
   2   2  -4 399.565 27.3295   3
  -2   2   4 379.847 27.5106   3
   1  -2  -4 438.578 32.9048   4
   1  -2  -4 421.709 32.9359   3
  -1  -2   4 435.218 32.8680   3
  -1  -2   4 471.886 32.6895   2
  -1   2   4 467.654 32.9134   4
  -1   2   4 517.977 33.1198   3
   1   2  -4 505.546 32.6725   2
   0  -2  -4 671.844 46.4990   3
   0  -2  -4 651.463 46.5060   4
   0  -2   4 638.928 46.2035   2
   0   2   4 666.617 46.5295   3
   0   2   4 690.082 46.4965   4
   0   2  -4 641.565 46.2211   2
   1  -2   4 134.144 10.1988   2
  -1  -2  -4 147.191 10.4059   3
  -1  -2  -4 143.120 10.5046   4
   1   2   4 147.823 10.4216   3
   1   2   4 138.616 10.4211   4
   1   2   4 152.839 10.2516   5
   1   2   4 141.084 10.1940   2
   2  -2   4 11.2235 1.13476   2
  -2  -2  -4 13.0748 1.48827   4
  -2  -2  -4 14.7338 1.16659   5
   2   2   4 11.6587 1.16216   5
   2   2   4 12.6760 1.25113   3
   2   2   4 12.9319 1.33327   4
   2   2   4 11.7852 1.27676   2
   3  -2   4 8.25803 1.18171   4
  -3  -2  -4 8.20833 1.27154   4
  -3  -2  -4 10.6511 1.02996   5
   3   2   4 9.23997 1.16427   4
   3   2   4 9.98123 1.23167   2
  -4  -2  -4 328.814 23.6052   5
  -4  -2  -4 350.972 23.7715   4
   4   2   4 315.619 23.5034   4
  -5  -2  -4 33.9548 2.99126   5
   5   2   4 34.1214 2.85216   3
  -6  -2  -4 116.481 8.21887   4
  -6  -2  -4 102.650 8.04950   5
   6   2   4 99.1971 7.72725   3
   7   2   4 17.2559 2.05159   3
  -8  -2  -4 10.8846 2.00200   4
 -11  -2  -4 1.55788 1.19977   5
 -12  -2  -4 22.7359 3.35370   5
 -13  -2  -4 72.5341 7.08962   5
 -13   3   4 -0.4289 2.60802   3
 -12   3   4 70.5499 7.01245   3
 -11  -3   4 46.2098 4.38228   3
 -11   3   4 52.6072 5.29671   3
 -10  -3   4 33.3248 3.40756   3
 -10  -3   4 40.7850 3.60296   4
 -10   3   4 35.0578 4.09705   3
  -9  -3   4 63.4005 5.03677   4
  -9  -3   4 57.5962 4.82615   3
  -9   3   4 58.9169 5.37783   3
  -8  -3   4 7.33166 1.45206   4
  -8  -3   4 8.89868 1.49219   3
  -8   3   4 6.86335 1.81216   3
  -7  -3   4 47.3055 3.70986   3
  -7  -3   4 38.4718 3.43382   4
  -7   3   4 39.7216 3.74768   3
   7   3  -4 31.3708 3.82928   3
  -6  -3   4 36.0885 3.22661   4
  -6  -3   4 33.6951 3.64430   2
  -6  -3   4 41.1475 3.32520   3
   6   3  -4 37.3816 3.40380   3
  -6   3   4 36.6448 3.45978   3
  -5  -3   4 231.917 14.8447   3
  -5  -3   4 175.184 14.9394   2
  -5  -3   4 188.612 14.6276   4
   5   3  -4 219.301 15.8249   3
  -5   3   4 203.546 14.9736   3
  -4  -3   4 1416.79 91.3579   3
  -4  -3   4 1121.01 91.3656   2
  -4  -3   4 1241.19 91.3307   4
   4   3  -4 1290.62 91.3000   3
  -4   3   4 1433.42 91.5701   3
  -3  -3   4 395.232 26.7568   3
  -3  -3   4 363.348 26.9875   2
  -3  -3   4 317.001 26.5961   4
  -3   3   4 433.025 27.0563   3
  -2  -3   4 11.7647 1.30698   2
   2  -3  -4 11.1614 1.49717   3
   2  -3  -4 13.1483 1.34989   4
  -2  -3   4 12.7089 1.32600   3
  -2   3   4 14.1639 1.38673   4
  -2   3   4 11.7700 1.53059   3
  -1  -3   4 282.034 19.3519   2
   1  -3  -4 261.551 19.5432   4
  -1   3   4 269.196 19.7038   3
  -1   3   4 281.916 19.5202   4
   0  -3  -4 317.024 22.4457   4
   0  -3   4 316.534 22.1561   2
   0  -3  -4 309.946 22.4262   3
   0   3  -4 325.850 22.2918   2
   0   3   4 303.803 22.4803   3
   1  -3   4 257.650 18.8850   2
  -1  -3  -4 285.405 19.0915   3
  -1  -3  -4 252.755 18.8683   2
  -1  -3  -4 269.799 19.1645   4
   1   3   4 291.052 19.1521   3
   1   3   4 274.096 19.0729   4
  -1   3  -4 254.489 18.9042   2
   1   3   4 256.457 18.8200   2
   2  -3   4 156.934 11.2036   2
  -2  -3  -4 157.366 11.4402   4
   2   3   4 148.227 11.2309   5
   2   3   4 156.264 11.3146   4
   2   3   4 148.223 11.2138   2
   2   3   4 170.844 11.3261   3
   3  -3   4 648.025 48.2141   2
  -3  -3  -4 711.748 48.3596   5
  -3  -3  -4 708.924 48.4393   4
   3   3   4 723.131 48.2401   3
   3   3   4 669.491 48.3323   2
   3   3   4 653.359 48.2787   4
  -4  -3  -4 167.898 12.1769   5
  -4  -3  -4 167.128 12.5518   4
  -5  -3  -4 124.022 9.37030   5
  -5  -3  -4 127.257 9.48361   4
  -6  -3  -4 135.920 10.1361   5
  -6  -3  -4 133.641 10.2079   4
  -7  -3  -4 18.6095 2.27711   5
  -7  -3  -4 17.0857 2.56023   4
   7   3   4 20.2816 2.06552   3
  -8  -3  -4 108.572 8.13270   4
  -8  -3  -4 92.1025 7.88254   5
  -9  -3  -4 145.855 12.1659   5
  -9  -3  -4 174.423 12.3989   4
 -10  -3  -4 1.54472 2.00429   4
 -10  -3  -4 0.04281 0.83580   5
 -11  -3  -4 4.14224 1.40967   5
 -12  -3  -4 71.4127 6.42066   5
 -13  -3  -4 34.1051 4.05112   5
 -13   4   4 3.66991 2.98181   3
 -12   4   4 5.70008 2.86814   3
 -11  -4   4 16.0262 2.54951   4
 -11   4   4 17.1683 3.32720   3
 -10  -4   4 34.5176 3.35105   4
 -10   4   4 25.2659 3.66699   3
  -9  -4   4 3.91479 1.38633   4
  -9  -4   4 5.35365 1.13989   3
  -9   4   4 2.46615 1.59519   3
  -8  -4   4 344.175 24.0970   4
  -8  -4   4 328.841 23.8905   3
   8   4  -4 331.781 24.3347   3
  -8   4   4 336.566 24.4560   3
  -7  -4   4 12.5841 2.51437   2
  -7  -4   4 13.4657 1.89248   4
  -7  -4   4 13.4966 1.64292   3
   7   4  -4 13.6011 2.04052   3
  -7   4   4 15.7174 2.25874   3
  -6  -4   4 78.2070 5.64455   3
  -6  -4   4 65.4679 6.09498   2
  -6  -4   4 67.6405 5.62962   4
   6   4  -4 71.6341 6.11932   3
  -6   4   4 76.6569 6.00111   3
  -5  -4   4 14.4937 1.67688   3
  -5  -4   4 14.5139 1.74094   4
  -5  -4   4 13.4685 2.16197   2
  -5   4   4 11.8133 1.73119   3
  -4  -4   4 174.190 13.5897   4
  -4  -4   4 198.046 13.6553   3
  -4  -4   4 164.846 13.7897   2
  -4   4   4 216.747 13.9994   3
  -3  -4   4 24.7063 2.15719   3
  -3  -4   4 22.8741 2.20254   4
  -3  -4   4 24.7921 2.33362   2
  -3   4   4 24.8349 2.43267   3
   2  -4  -4 55.4373 4.29426   4
  -2  -4   4 58.6733 4.33913   2
  -2  -4   4 47.8963 4.21782   4
   2  -4  -4 49.6844 4.63907   3
   2  -4  -4 50.1511 3.96425   2
  -2  -4   4 53.8542 4.24946   3
  -2   4   4 61.5805 4.22585   4
  -2   4   4 63.6187 4.93581   3
  -1  -4   4 439.883 29.8080   2
   1  -4  -4 402.075 29.6203   2
  -1  -4   4 416.087 29.6425   5
   1  -4  -4 402.465 30.1249   3
   1  -4  -4 415.487 29.9964   4
   1   4  -4 479.898 29.8145   2
  -1   4   4 375.804 30.1017   3
  -1   4   4 451.483 30.0512   4
   0  -4  -4 171.205 12.3059   4
   0  -4  -4 145.304 12.2553   3
   0  -4   4 171.861 12.0276   2
   0  -4  -4 175.377 11.9441   2
   0   4   4 173.748 12.2012   4
   0   4   4 172.422 11.9007   2
   0   4   4 167.632 12.3652   3
   0   4  -4 172.350 12.0629   2
   1  -4   4 214.083 15.3577   2
  -1  -4  -4 194.546 15.3321   2
  -1  -4  -4 217.527 15.5432   3
  -1  -4  -4 219.779 15.6225   4
   1   4   4 213.645 15.5021   4
  -1   4  -4 198.509 15.3652   2
   1   4   4 226.565 15.6267   3
   1   4   4 245.570 15.2742   2
  -2  -4  -4 25.5822 2.10947   3
  -2  -4  -4 24.7886 2.34150   4
  -2  -4  -4 23.0716 2.11390   2
   2  -4   4 24.1042 2.05004   2
   2   4   4 23.5620 2.05226   2
   2   4   4 27.2013 2.23782   3
   3  -4   4 706.507 47.8991   2
  -3  -4  -4 646.266 47.9664   2
  -3  -4  -4 669.904 48.0603   4
  -3  -4  -4 736.601 47.9018   5
   3   4   4 641.515 47.9185   2
  -4  -4  -4 240.675 17.9509   4
  -4  -4  -4 265.375 17.8329   5
   4  -4   4 238.162 17.7865   2
  -5  -4  -4 186.807 12.9769   5
  -5  -4  -4 166.867 13.0408   4
  -6  -4  -4 49.8393 4.09604   5
  -6  -4  -4 45.6356 4.23123   4
  -7  -4  -4 74.4851 5.97795   5
  -7  -4  -4 71.5231 6.09559   4
  -8  -4  -4 13.6786 2.24631   5
  -8  -4  -4 18.9947 2.68422   4
  -9  -4  -4 38.3327 4.08555   4
  -9  -4  -4 31.8309 3.55404   5
 -10  -4  -4 9.49317 2.53292   4
 -10  -4  -4 5.43969 1.60739   5
 -11  -4  -4 -2.7950 2.33689   4
 -11  -4  -4 1.41926 1.14617   5
 -12  -4  -4 97.5417 8.30783   5
 -13  -4  -4 -0.7280 1.29595   5
 -13   5   4 19.0238 4.56645   3
 -12  -5   4 11.7220 2.76031   4
 -12   5   4 13.6027 3.42961   3
 -11  -5   4 36.4058 3.87402   4
 -11   5   4 31.4368 4.52570   3
 -10  -5   4 5.67963 1.89012   4
 -10   5   4 6.58789 2.20126   3
  -9  -5   4 14.0052 2.27851   4
  -9   5   4 10.1936 2.10794   3
  -8  -5   4 15.5219 2.23112   4
  -8   5   4 13.4878 2.80988   3
  -7  -5   4 116.101 8.64699   4
  -7  -5   4 103.064 9.14432   2
  -7   5   4 118.210 8.94325   3
  -6  -5   4 140.162 11.9130   2
  -6  -5   4 166.059 11.5500   4
  -6   5   4 158.556 11.8140   3
  -5  -5   4 158.630 11.6324   3
  -5  -5   4 157.162 11.7074   4
  -5  -5   4 144.765 12.0339   2
  -5   5   4 177.401 12.1042   3
  -4  -5   4 291.597 23.8691   2
  -4  -5   4 340.083 23.6589   3
  -4  -5   4 326.927 23.6932   4
  -4   5   4 369.613 24.0734   3
  -3  -5   4 173.390 13.3073   2
  -3  -5   4 181.128 13.2067   4
  -3  -5   4 159.513 13.0073   5
   3  -5  -4 180.910 12.9636   2
  -3  -5   4 191.039 13.1885   3
  -3   5   4 209.400 13.5506   3
  -2  -5   4 160.536 11.6486   4
   2  -5  -4 151.786 11.3447   2
  -2  -5   4 171.268 11.6608   2
   2  -5  -4 156.724 11.6720   4
  -2  -5   4 150.928 11.3903   5
  -2   5   4 161.828 11.8705   3
  -2   5   4 169.058 11.5390   4
  -1  -5   4 111.567 7.49457   2
   1  -5  -4 106.678 7.28227   2
   1  -5  -4 94.2691 7.82788   3
   1  -5  -4 101.195 7.66867   4
  -1   5   4 91.3997 7.29318   2
  -1   5   4 98.0683 7.79923   3
  -1   5   4 111.968 7.55562   4
   0  -5  -4 129.059 8.24560   2
   0  -5   4 121.505 8.32205   2
   0  -5   4 105.639 8.43156   4
   0  -5  -4 117.712 8.59049   4
   0  -5  -4 104.627 8.60452   3
   0   5   4 114.144 8.18302   2
   0   5   4 107.769 8.60012   3
   0   5   4 117.473 8.45643   4
  -1  -5  -4 81.4701 6.31201   2
  -1  -5  -4 91.8706 7.30112   4
  -1  -5  -4 80.4314 6.47360   3
   1  -5   4 86.2552 6.30042   2
   1   5   4 77.2707 6.47678   3
   1   5   4 98.6411 6.20196   2
   2  -5   4 35.0838 2.77310   2
  -2  -5  -4 33.3307 3.03289   4
  -2  -5  -4 33.1708 2.82297   2
  -2  -5  -4 35.0191 2.82730   3
   2   5   4 34.8798 2.70931   2
   2   5   4 33.8692 2.90536   3
   3  -5   4 313.219 21.8485   2
  -3  -5  -4 299.996 22.0331   4
   4  -5   4 3.14003 0.84180   2
  -4  -5  -4 2.74903 0.98570   2
  -4  -5  -4 2.76533 0.93348   4
  -4  -5  -4 3.42583 0.72394   5
   5  -5   4 54.2229 4.50267   2
  -5  -5  -4 52.1406 4.73538   4
  -5  -5  -4 59.6446 4.52549   5
  -6  -5  -4 39.9239 3.30658   5
   6  -5   4 35.6047 3.25791   2
  -6  -5  -4 32.1899 3.50827   4
  -7  -5  -4 33.6773 3.26681   5
  -7  -5  -4 34.5111 3.63004   4
  -8  -5  -4 38.3759 4.13286   4
  -9  -5  -4 143.815 11.3753   4
  -9  -5  -4 141.725 11.1014   5
 -10  -5  -4 11.3651 2.18624   5
 -10  -5  -4 11.4425 2.72174   4
 -11  -5  -4 35.8575 5.40610   4
 -11  -5  -4 36.7619 4.00786   5
 -12  -5  -4 52.2155 6.29170   4
 -12  -5  -4 47.1670 4.97790   5
 -13  -5  -4 1.46695 1.66751   5
 -13  -6   4 1.32153 2.91105   4
 -13  -6   4 10.3857 2.41446   5
 -13   6   4 7.95411 3.31205   3
 -12  -6   4 5.92648 1.84273   5
 -12  -6   4 8.01057 2.73801   4
 -12   6   4 5.56735 3.02000   3
 -11  -6   4 42.0286 4.30301   4
 -11   6   4 31.3023 4.56964   3
 -10  -6   4 6.13930 2.70152   4
 -10   6   4 -1.0176 1.68953   3
  -9  -6   4 2.00245 1.44140   4
  -9   6   4 0.91149 1.73649   3
  -8  -6   4 16.9762 3.15034   2
  -8  -6   4 24.0446 2.68203   4
  -8   6   4 21.0211 2.93052   3
  -7  -6   4 26.2549 3.68095   2
  -7  -6   4 29.6271 3.08190   4
  -7   6   4 30.8021 3.23591   3
  -6  -6   4 103.099 7.90649   4
  -6  -6   4 97.9393 8.44257   2
  -6   6   4 107.054 8.21786   3
  -5  -6   4 104.737 7.99218   4
   5  -6  -4 103.456 7.78646   2
  -5  -6   4 88.4026 7.85098   5
  -5  -6   4 108.112 8.40983   2
  -5   6   4 126.107 8.41462   3
  -4  -6   4 26.6654 2.60936   5
   4  -6  -4 31.5402 2.56535   2
  -4  -6   4 30.1436 3.08811   2
  -4  -6   4 33.6241 2.90169   4
  -4   6   4 34.5113 3.14695   3
   3  -6  -4 225.175 16.3093   2
  -3  -6   4 218.456 16.3627   5
  -3  -6   4 230.056 16.5226   3
  -3  -6   4 235.998 16.7252   2
  -3  -6   4 247.848 16.6199   4
  -3   6   4 222.097 16.8342   3
   2  -6  -4 481.084 34.6252   4
  -2  -6   4 485.429 34.5812   4
   2  -6  -4 470.906 34.2790   2
  -2  -6   4 523.938 34.3259   5
  -2  -6   4 498.638 34.5865   2
  -2   6   4 466.585 34.7580   3
  -2   6   4 490.174 34.4384   4
   1  -6  -4 217.919 16.0816   4
  -1  -6   4 219.921 15.8588   4
  -1  -6   4 235.756 15.7654   2
   1  -6  -4 233.021 15.5537   2
  -1   6   4 195.058 15.5704   2
  -1   6   4 219.779 16.0084   3
   0  -6   4 451.579 32.4340   4
   0  -6  -4 515.247 32.2383   2
   0  -6  -4 440.483 32.6450   3
   0  -6   4 476.964 32.3032   2
   0  -6  -4 460.812 32.5601   4
   0   6   4 449.404 32.1787   2
   0   6   4 426.752 32.5045   3
   0   6  -4 441.787 32.1341   5
  -1  -6  -4 28.6875 2.53425   2
  -1  -6  -4 28.3232 2.77014   3
   1  -6   4 32.1334 2.50925   2
  -1  -6  -4 30.8977 2.81107   4
   1   6   4 28.5584 2.66807   3
   1   6   4 33.4434 2.38922   2
   2  -6   4 48.8410 3.68969   2
   2  -6   4 45.4063 3.75315   4
  -2  -6  -4 46.7375 3.96351   4
  -2  -6  -4 45.0019 3.73778   3
  -2  -6  -4 44.0080 3.77198   2
   2   6   4 45.5508 3.73442   3
   2   6   4 51.4294 3.60434   2
  -3  -6  -4 96.4564 7.63935   2
   3  -6   4 99.4831 7.46511   4
  -3  -6  -4 101.164 7.77209   4
   3  -6   4 106.047 7.52874   2
  -4  -6  -4 26.8154 3.00138   2
  -4  -6  -4 30.1197 3.02582   4
  -4  -6  -4 37.3438 2.80096   5
   4  -6   4 29.4480 2.72057   2
  -5  -6  -4 10.6304 1.33547   5
  -5  -6  -4 8.35995 1.72222   4
   5  -6   4 9.03464 1.46821   2
  -6  -6  -4 12.1336 2.13318   4
  -6  -6  -4 17.3032 1.82778   5
   6  -6   4 12.5305 1.79748   2
  -7  -6  -4 28.1991 3.26228   4
   7  -6   4 24.0482 2.77180   2
  -7  -6  -4 27.6820 2.77955   5
  -8  -6  -4 112.011 9.09878   4
  -8  -6  -4 110.835 8.76420   5
   8  -6   4 110.216 8.73926   2
  -9  -6  -4 19.2283 2.76040   5
   9  -6   4 23.5068 2.83563   2
  -9  -6  -4 27.6768 3.79823   4
 -10  -6  -4 47.2455 5.26634   4
 -10  -6  -4 46.3955 4.58211   5
 -11  -6  -4 34.4721 4.99877   4
 -11  -6  -4 31.4423 3.81585   5
 -12  -6  -4 13.8218 3.87209   4
  13  -6   4 6.25412 2.19317   2
 -13  -6  -4 7.00893 2.07111   5
 -13  -6  -4 0.49554 3.96387   4
 -12  -7   4 20.3292 3.39459   5
 -12  -7   4 25.4741 3.78846   4
 -11  -7   4 3.97916 2.14094   4
 -11  -7   4 -0.4135 1.31051   5
 -11   7   4 2.77020 2.50078   3
 -10  -7   4 105.775 7.75664   4
 -10  -7   4 82.5262 7.45890   5
 -10   7   4 83.1373 8.00136   3
  -9  -7   4 32.1441 3.60283   5
  -9  -7   4 44.7965 4.04697   4
  -9   7   4 32.6858 4.14537   3
  -8  -7   4 79.6292 5.97780   4
  -8  -7   4 67.5343 6.60762   2
  -8  -7   4 64.0835 5.73336   5
  -8   7   4 64.7075 6.13653   3
  -7  -7   4 31.6164 3.97392   2
   7  -7  -4 32.7156 3.09005   2
  -7  -7   4 31.0670 3.17440   5
  -7  -7   4 33.4680 3.33009   4
  -7   7   4 38.0795 3.56479   3
   6  -7  -4 30.7183 2.84108   2
  -6  -7   4 35.6983 3.19628   4
  -6  -7   4 28.4727 2.91287   5
  -6  -7   4 26.7708 3.61767   2
  -6   7   4 35.1796 3.41201   3
  -5  -7   4 122.725 10.2082   2
   5  -7  -4 128.348 9.58947   2
  -5  -7   4 136.934 9.84379   4
  -5  -7   4 122.385 9.67363   5
  -5   7   4 143.694 10.1874   3
  -4  -7   4 353.485 24.9889   4
   4  -7  -4 348.516 24.7270   2
  -4  -7   4 335.907 24.7868   5
  -4  -7   4 332.115 25.2125   2
  -4   7   4 375.387 25.3494   3
  -3  -7   4 108.090 7.90707   4
  -3  -7   4 111.645 7.62056   5
   3  -7  -4 102.145 7.56059   2
  -3  -7   4 99.3848 7.98111   2
   3  -7  -4 95.5176 7.84377   4
  -3   7   4 113.341 8.17715   3
  -3   7   4 99.2633 7.63280   4
  -2  -7   4 81.9881 6.40097   4
   2  -7  -4 79.3445 6.08367   2
  -2  -7   4 85.1848 6.41016   2
   2  -7  -4 90.1780 6.75513   4
  -2   7   4 82.5799 6.60933   3
   1  -7  -4 20.7427 1.60401   2
  -1  -7   4 18.7498 2.00799   4
   1  -7  -4 17.3844 2.11307   4
  -1  -7   4 19.6899 1.83540   2
  -1   7   4 19.0157 2.06458   3
  -1   7   4 17.8328 1.65605   2
   0  -7   4 22.9957 2.19069   4
   0  -7  -4 23.4052 1.91322   2
   0  -7   4 24.5834 1.98960   2
   0  -7  -4 20.3186 2.33128   4
   0   7   4 19.1203 2.19526   3
   0   7  -4 21.6451 1.79091   5
   0   7   4 22.2413 1.84068   2
  -1  -7  -4 149.974 11.2575   4
  -1  -7  -4 138.917 11.2019   3
  -1  -7  -4 151.635 11.0216   2
   1  -7   4 157.519 10.9522   2
   1  -7   4 155.005 11.0745   4
   1   7   4 138.995 11.0478   3
   1   7   4 165.416 10.8438   2
   2  -7   4 51.8853 3.77417   2
   2  -7   4 47.0903 3.84055   4
  -2  -7  -4 44.4464 3.84766   3
  -2  -7  -4 46.5092 4.06965   4
  -2  -7  -4 48.9118 3.94595   2
   2   7   4 45.5454 3.77281   3
  -3  -7  -4 328.754 24.8767   2
  -3  -7  -4 348.790 25.0039   4
   3  -7   4 360.486 24.7380   2
   3  -7   4 349.637 24.8234   4
  -4  -7  -4 138.177 10.4749   4
  -4  -7  -4 132.886 10.4311   2
   4  -7   4 141.325 10.2027   2
  -5  -7  -4 12.3597 2.01694   4
   5  -7   4 8.23413 1.40699   2
  -5  -7  -4 6.32985 1.78155   2
  -5  -7  -4 8.10390 1.35964   5
  -6  -7  -4 58.2265 4.93290   5
  -6  -7  -4 61.9682 5.42869   4
   6  -7   4 60.8571 5.01741   2
   7  -7   4 159.458 12.3794   2
  -7  -7  -4 183.249 13.0040   5
  -7  -7  -4 155.666 12.6409   4
  -8  -7  -4 23.7974 3.61135   4
  -8  -7  -4 24.6029 2.70341   5
   8  -7   4 21.5441 2.77351   2
   9  -7   4 12.0073 2.14795   2
  -9  -7  -4 8.31462 1.86071   5
  -9  -7  -4 9.92620 2.63922   4
 -10  -7  -4 56.6548 5.16364   5
  10  -7   4 53.9921 5.12809   2
 -10  -7  -4 52.9528 6.01450   4
 -11  -7  -4 45.4050 6.04124   4
  11  -7   4 42.9301 4.63332   2
 -11  -7  -4 49.1446 4.72863   5
 -12  -7  -4 36.6841 5.76906   4
 -12  -7  -4 50.0645 4.80821   5
  12  -7   4 48.0951 4.94440   2
 -12  -8   4 2.83185 2.70684   4
 -12  -8   4 6.87223 2.60830   5
  12  -8  -4 10.6022 2.73846   2
 -12   8   4 3.05355 3.14923   3
 -11  -8   4 54.6183 5.47138   5
 -11  -8   4 62.3162 5.99864   4
  11  -8  -4 64.5285 5.49839   2
 -11   8   4 54.2371 6.50240   3
 -10  -8   4 18.3562 2.91492   5
 -10  -8   4 26.6760 3.69283   4
  10  -8  -4 20.0690 2.85903   2
 -10   8   4 17.8855 3.52332   3
  -9  -8   4 17.7151 3.49988   2
  -9  -8   4 23.8708 2.81628   5
  -9  -8   4 28.4534 3.39329   4
   9  -8  -4 25.4364 2.80857   2
  -9   8   4 17.3291 3.16916   3
   8  -8  -4 3.52195 1.98208   2
  -8  -8   4 6.28214 2.20220   2
  -8  -8   4 7.72930 1.82228   4
  -8  -8   4 6.43676 1.68019   5
  -8   8   4 3.66040 1.71811   3
   7  -8  -4 29.3992 2.75347   2
  -7  -8   4 23.1036 3.83249   2
  -7  -8   4 25.4252 2.74311   5
  -7  -8   4 32.7018 3.92596   4
  -7   8   4 24.7263 3.31952   3
   6  -8  -4 23.4898 2.41558   2
  -6  -8   4 19.3077 4.02692   2
  -6  -8   4 23.7908 2.49190   5
  -6  -8   4 29.8536 2.89360   4
  -6   8   4 28.3144 3.43212   3
   5  -8  -4 218.338 16.2043   2
  -5  -8   4 235.908 16.3158   5
  -5  -8   4 235.333 16.5221   4
  -5  -8   4 203.874 16.8242   2
  -5   8   4 232.050 16.7827   3
  -4  -8   4 20.9731 2.81235   2
  -4  -8   4 24.8490 2.63485   4
   4  -8  -4 21.7458 2.08344   2
  -4  -8   4 24.1890 2.14351   5
  -4   8   4 26.9073 2.74001   3
   3  -8  -4 71.2185 5.68327   2
  -3  -8   4 82.8399 6.22179   2
  -3  -8   4 75.8796 6.04447   4
   3  -8  -4 71.4973 6.12058   4
  -3   8   4 87.6003 6.37424   3
   2  -8  -4 22.5382 1.76649   2
   2  -8  -4 22.2072 2.35107   4
  -2  -8   4 18.5421 2.16244   2
  -2  -8   4 14.6156 2.03158   3
  -2  -8   4 20.2669 2.18894   4
  -2   8   4 22.6437 2.33158   3
   1  -8  -4 74.9284 5.18668   2
  -1  -8   4 70.8604 5.40180   2
  -1  -8   4 68.8982 5.48118   4
   1  -8  -4 70.3320 5.67285   4
  -1   8   4 63.4894 5.55184   3
   0  -8  -4 110.613 8.98385   4
   0  -8   4 114.897 8.83773   4
   0  -8   4 121.512 8.72571   2
   0  -8  -4 121.556 8.65830   2
   0   8   4 119.010 8.95655   3
   0   8  -4 123.290 8.61452   5
   1  -8   4 19.2841 2.11203   4
  -1  -8  -4 15.5985 2.48906   3
  -1  -8  -4 16.4841 1.99057   2
   1  -8   4 20.2959 1.87188   2
  -1  -8  -4 20.3288 2.27010   4
   1   8   4 24.9964 2.28494   3
   2  -8   4 225.875 15.4499   4
   2  -8   4 229.995 15.4076   2
  -2  -8  -4 209.102 15.5368   2
  -2  -8  -4 188.383 15.4478   3
  -2  -8  -4 218.643 15.7458   4
   2   8   4 210.434 15.3381   3
   3  -8   4 16.2785 1.97634   4
  -3  -8  -4 17.1498 2.33077   2
  -3  -8  -4 20.1088 2.38021   4
   3  -8   4 21.0278 1.94868   2
  -4  -8  -4 108.499 8.61344   4
  -4  -8  -4 105.513 8.55331   2
   4  -8   4 112.753 8.26391   2
  -5  -8  -4 455.672 34.6100   2
   5  -8   4 489.695 34.3307   2
  -5  -8  -4 498.945 34.6697   4
  -6  -8  -4 97.4954 8.64352   2
  -6  -8  -4 98.7828 8.63437   4
  -6  -8  -4 121.927 8.33743   5
  -7  -8  -4 17.3023 2.08808   5
   7  -8   4 11.7052 2.02799   2
   8  -8   4 28.9388 3.26737   2
  -8  -8  -4 33.4664 4.31494   4
  -8  -8  -4 32.6190 3.31222   5
   9  -8   4 26.8689 3.34948   2
  -9  -8  -4 33.8294 3.42716   5
  -9  -8  -4 34.2703 4.65025   4
  10  -8   4 5.79247 1.92059   2
 -10  -8  -4 9.77106 1.97336   5
 -10  -8  -4 5.19703 2.97529   4
 -11  -8  -4 11.3741 3.74316   4
 -11  -8  -4 9.66516 2.15802   5
  11  -8   4 10.4020 2.40175   2
 -12  -8  -4 58.0761 8.26188   4
  12  -8   4 83.6843 6.94983   2
 -12  -8  -4 72.2328 6.63703   5
 -12  -9   4 35.6866 4.17525   5
  12  -9  -4 42.6179 4.28716   2
 -12  -9   4 34.4709 5.29980   4
  11  -9  -4 5.23307 1.71451   2
 -11  -9   4 2.33236 1.38484   5
 -11  -9   4 1.49079 2.45780   4
 -11   9   4 4.14304 2.91342   3
  10  -9  -4 3.21549 1.47051   2
 -10  -9   4 4.62710 1.54682   5
 -10  -9   4 3.54487 2.03864   4
 -10   9   4 2.59105 2.38770   3
  -9  -9   4 4.12837 2.51770   2
  -9  -9   4 9.90101 2.34169   4
  -9  -9   4 7.60938 1.74801   5
   9  -9  -4 6.78806 1.72799   2
  -9   9   4 5.01427 2.10966   3
  -8  -9   4 1.78147 2.26778   2
  -8  -9   4 3.56952 1.66884   4
  -8  -9   4 2.01809 1.06358   5
   8  -9  -4 2.97415 1.18774   2
  -8   9   4 3.58431 1.77918   3
  -7  -9   4 1.00825 1.84274   2
   7  -9  -4 0.65194 0.92135   2
  -7  -9   4 1.18140 0.79775   5
  -7   9   4 0.48322 1.36918   3
  -6  -9   4 66.4402 6.20375   4
   6  -9  -4 68.3075 5.30325   2
  -6  -9   4 65.5564 5.32451   5
  -6   9   4 65.2111 5.97747   3
  -5  -9   4 8.13884 1.69369   4
  -5  -9   4 5.47365 1.05962   5
   5  -9  -4 6.94782 1.10039   2
  -5   9   4 6.32693 2.01624   3
   4  -9  -4 137.275 10.2293   2
  -4  -9   4 135.536 10.5939   4
  -4  -9   4 146.145 10.9616   2
  -4   9   4 145.948 10.8814   3
  -3  -9   4 27.3486 2.57467   4
   3  -9  -4 21.0481 2.56703   4
  -3  -9   4 18.0874 2.10901   3
   3  -9  -4 22.4489 1.95069   2
  -3  -9   4 19.8968 2.56098   2
  -3   9   4 22.2578 2.59651   3
   2  -9  -4 85.3412 7.02581   4
  -2  -9   4 95.3396 6.97383   4
  -2  -9   4 86.3798 6.91233   2
   2  -9  -4 91.1015 6.53735   2
  -2   9   4 85.6348 7.05970   3
   1  -9  -4 14.6397 1.55747   2
  -1  -9   4 19.3400 2.06636   4
   1  -9  -4 13.0850 2.03818   4
  -1  -9   4 16.3665 1.83119   2
  -1   9   4 16.7566 2.05898   3
   0  -9  -4 3.28327 0.91914   2
   0  -9   4 3.31722 0.82390   2
   0  -9  -4 6.90205 1.52862   4
   0  -9   4 4.96813 1.16742   4
   0   9  -4 3.25339 0.69213   5
   0   9   4 2.18841 1.06054   3
   1  -9   4 2.61819 0.80158   2
  -1  -9  -4 0.99748 1.03890   2
   1  -9   4 1.61071 0.96140   4
  -1  -9  -4 4.15767 1.31865   4
   1   9   4 2.71557 0.98899   3
  -2  -9  -4 25.0047 3.03229   3
  -2  -9  -4 31.7505 3.01531   2
   2  -9   4 30.5047 2.68043   2
   2  -9   4 32.3993 2.86927   4
  -2  -9  -4 31.9465 3.22421   4
   2   9   4 29.7993 2.65352   3
  -3  -9  -4 42.0535 4.19706   2
   3  -9   4 47.8324 3.89449   4
  -3  -9  -4 48.9856 4.35647   4
   3  -9   4 45.4021 3.83273   2
  -4  -9  -4 73.5005 6.49691   2
  -4  -9  -4 78.7545 6.53765   4
   4  -9   4 77.7336 6.05094   2
  -5  -9  -4 73.2154 5.94049   4
  -5  -9  -4 60.5130 5.89379   2
   5  -9   4 62.9187 5.65494   2
  -6  -9  -4 6.72705 2.18665   4
   6  -9   4 7.43547 1.55182   2
  -6  -9  -4 5.63948 1.95250   2
   7  -9   4 10.0308 1.91249   2
  -7  -9  -4 12.3630 2.72944   4
  -8  -9  -4 42.8828 3.84803   5
   8  -9   4 34.4527 3.74373   2
  -8  -9  -4 36.5743 4.93597   4
  -9  -9  -4 22.2895 2.61463   5
  -9  -9  -4 17.0586 3.61287   4
   9  -9   4 13.1653 2.49313   2
 -10  -9  -4 4.37901 1.48742   5
  10  -9   4 4.97059 1.79054   2
 -10  -9  -4 1.25117 2.96201   4
 -11  -9  -4 110.592 11.9109   4
 -11  -9  -4 146.685 11.0820   5
  11  -9   4 136.377 10.7555   2
 -12  -9  -4 54.9681 5.40521   5
 -12  -9  -4 51.2881 7.46482   4
  11 -10  -4 11.9692 2.51578   2
 -11 -10   4 20.5556 2.93364   5
 -11 -10   4 17.8206 3.41093   4
 -11  10   4 5.73124 3.45492   3
  10 -10  -4 12.9154 2.23799   2
 -10 -10   4 12.8706 2.24621   5
 -10 -10   4 14.2698 3.08082   4
 -10  10   4 6.12946 3.68834   3
  -9 -10   4 30.8537 3.63451   4
  -9 -10   4 20.2111 2.66300   5
   9 -10  -4 22.7810 2.66738   2
  -9 -10   4 10.1126 3.35761   2
  -9  10   4 18.6166 3.35025   3
  -8 -10   4 16.1124 3.37776   2
   8 -10  -4 27.2886 2.69307   2
  -8 -10   4 19.6582 2.53527   5
  -8  10   4 24.0966 3.42229   3
  -7 -10   4 1.42152 2.07077   2
  -7 -10   4 -1.8219 1.18205   4
   7 -10  -4 1.03115 1.05458   2
  -7 -10   4 -0.4824 0.76338   5
  -7  10   4 1.55964 1.61904   3
  -6 -10   4 22.2942 2.27631   5
  -6 -10   4 17.5297 3.20913   2
   6 -10  -4 21.8207 2.30210   2
  -6 -10   4 27.1428 2.92880   4
  -6  10   4 19.4943 3.20056   3
  -5 -10   4 52.5858 4.49264   4
  -5 -10   4 44.4023 4.88250   2
   5 -10  -4 48.9647 3.97137   2
  -5  10   4 46.9915 4.78451   3
  -4 -10   4 152.192 11.4284   4
   4 -10  -4 136.471 11.0552   4
  -4 -10   4 137.643 11.4587   2
   4 -10  -4 144.845 10.6172   2
  -4  10   4 160.030 11.4600   3
   2 -10  -4 20.5205 2.68138   4
   2 -10  -4 18.6327 1.85536   2
  -2 -10   4 19.9400 2.38216   2
  -2  10   4 20.3745 2.55613   3
   1 -10  -4 27.1880 2.43236   2
   1 -10  -4 25.6918 3.07540   4
  -1 -10   4 28.1911 2.83451   4
  -1 -10   4 24.9887 2.67961   2
  -1  10   4 28.8209 2.90234   3
   0 -10   4 21.7890 2.40747   2
   0 -10  -4 28.6611 2.98383   4
   0 -10   4 25.0365 2.61669   4
   0 -10  -4 23.5492 2.40221   2
   0  10  -4 22.1177 2.24227   5
   0  10   4 28.5584 2.76212   3
   1 -10   4 11.1580 1.70497   4
  -1 -10  -4 12.9292 2.19813   4
   1 -10   4 10.2190 1.52829   2
  -1 -10  -4 12.0790 1.86498   2
   1  10   4 12.5526 1.82448   3
  -1  10  -4 8.84967 1.16565   5
   2 -10   4 33.2220 2.87575   4
  -2 -10  -4 26.9391 3.03926   2
   2 -10   4 28.8953 2.69140   2
  -2 -10  -4 29.9972 3.30469   4
   2  10   4 25.3353 2.67260   3
  -3 -10  -4 161.284 12.6547   2
  -3 -10  -4 164.331 12.8039   4
   3 -10   4 174.498 12.3267   2
   3 -10   4 168.586 12.2827   4
  -4 -10  -4 59.4463 5.79062   2
   4 -10   4 63.1617 5.16845   4
  -4 -10  -4 77.5075 7.00474   4
   5 -10   4 37.7017 3.37094   2
  -5 -10  -4 29.6075 4.08820   2
  -5 -10  -4 40.0295 4.24797   4
  -6 -10  -4 26.4999 3.78661   4
  -6 -10  -4 22.2617 3.56974   2
   6 -10   4 24.9740 2.76902   2
  -7 -10  -4 10.3009 2.79794   4
   7 -10   4 13.1627 2.18046   2
   8 -10   4 -0.2091 1.19715   2
  -8 -10  -4 2.58408 2.60091   4
  -9 -10  -4 25.8307 4.44088   4
   9 -10   4 26.2148 3.31018   2
 -10 -10  -4 3.04785 1.45985   5
  10 -10   4 3.43773 1.70845   2
 -10 -10  -4 2.97344 3.41780   4
 -11 -10  -4 43.5282 4.57866   5
 -11 -10  -4 50.1001 6.79125   4
  11 -10   4 38.7606 4.62918   2
 -11 -11   4 4.80537 2.90158   4
 -11 -11   4 6.40407 2.09570   5
  10 -11  -4 65.8685 5.61282   2
 -10 -11   4 64.2820 5.55576   5
 -10 -11   4 54.1981 6.27909   4
  -9 -11   4 10.7130 1.97810   5
   9 -11  -4 14.2448 2.12813   2
  -9 -11   4 15.5260 2.91090   4
  -9 -11   4 10.2537 3.35997   2
  -9  11   4 3.77810 2.81707   3
  -8 -11   4 9.63535 3.07890   2
  -8 -11   4 11.0243 2.59954   4
   8 -11  -4 14.1472 2.05356   2
  -8 -11   4 10.4187 1.83507   5
  -8  11   4 7.62425 2.45762   3
  -7 -11   4 43.6601 3.74810   5
   7 -11  -4 38.4833 3.71543   2
  -7 -11   4 43.1795 5.06597   2
  -7 -11   4 46.3975 4.43008   4
  -7  11   4 36.6347 4.82145   3
  -6 -11   4 36.4002 4.36588   2
  -6 -11   4 36.8812 3.69986   4
   6 -11  -4 31.5735 3.35454   2
  -6  11   4 36.5077 4.22957   3
  -5 -11   4 47.7181 4.41682   4
   5 -11  -4 47.5428 3.86775   2
  -5 -11   4 40.1890 4.73252   2
  -5  11   4 50.4317 4.83464   3
   4 -11  -4 30.6968 2.66975   2
  -4 -11   4 30.6244 3.27629   4
   4 -11  -4 27.4586 3.66278   4
  -4 -11   4 27.9500 3.59511   2
  -4  11   4 32.7862 3.59207   3
  -3 -11   4 98.2118 7.66501   4
   3 -11  -4 94.7717 7.06898   2
  -3 -11   4 91.4633 7.71844   2
   3 -11  -4 90.8867 7.70699   4
  -3  11   4 100.305 7.85198   3
  -2 -11   4 52.4938 4.75804   2
   2 -11  -4 51.3778 4.11368   2
  -2 -11   4 55.2477 4.67330   4
   2 -11  -4 48.9920 4.87248   4
  -2  11   4 52.7948 4.77608   3
  -1 -11   4 503.428 36.9681   2
   1 -11  -4 529.156 35.9192   2
  -1 -11   4 508.701 36.2555   4
   1 -11  -4 479.952 36.4419   4
  -1  11   4 516.516 36.4053   3
   0 -11  -4 38.1193 3.76615   2
   0 -11   4 43.4891 3.91302   2
   0 -11  -4 47.4395 4.41264   4
   0 -11   4 42.8644 4.02161   4
   0  11   4 50.2960 4.19102   3
  -1 -11  -4 35.2399 3.63024   2
  -1 -11  -4 43.8478 4.14395   4
   1 -11   4 41.1804 3.73820   2
   1 -11   4 37.6593 3.65478   4
   1  11   4 39.1826 3.62660   3
   2 -11   4 98.7709 7.67948   4
  -2 -11  -4 96.6378 7.90858   2
   2 -11   4 118.171 8.21291   2
  -2 -11  -4 105.808 8.20478   4
   2  11   4 82.7082 7.57516   3
  -3 -11  -4 81.7083 7.10477   2
   3 -11   4 83.8724 6.54493   2
   3 -11   4 84.1293 6.62394   4
  -3 -11  -4 85.6857 7.24867   4
   4 -11   4 63.7640 5.11771   2
  -4 -11  -4 62.4114 5.88142   4
   4 -11   4 63.1623 5.08988   4
  -4 -11  -4 56.6624 5.86073   2
  -5 -11  -4 7.35863 2.23698   4
   5 -11   4 7.18297 1.51688   2
  -6 -11  -4 6.90780 2.75869   2
   6 -11   4 8.59398 1.72561   2
  -6 -11  -4 12.6085 2.85106   4
   7 -11   4 8.19148 1.79802   2
  -7 -11  -4 8.39717 2.96269   4
  -7 -11  -4 6.33711 2.75538   2
   8 -11   4 38.2717 3.95856   2
  -8 -11  -4 40.2861 5.56705   4
   9 -11   4 17.9488 2.95333   2
  -9 -11  -4 19.8297 4.24039   4
  10 -11   4 8.30404 2.20542   2
 -10 -11  -4 13.7864 4.71348   4
 -10 -12   4 5.58319 3.45597   2
 -10 -12   4 13.1609 2.27154   5
  10 -12  -4 15.2158 2.43177   2
 -10 -12   4 6.04161 2.86320   4
 -10  12   4 9.03658 3.47265   3
   9 -12  -4 25.1349 3.06611   2
  -9 -12   4 13.0151 3.82366   2
  -9 -12   4 24.7110 3.75191   4
  -9 -12   4 32.9146 3.02416   5
  -9  12   4 14.6065 3.74890   3
  -8 -12   4 13.3545 2.72596   4
   8 -12  -4 11.5642 1.90679   2
  -8 -12   4 3.32231 2.67911   2
  -8  12   4 12.4421 3.03673   3
   7 -12  -4 18.2067 2.33415   2
  -7 -12   4 22.8250 3.30187   4
  -7 -12   4 12.1965 3.31750   2
  -7  12   4 18.3798 3.48299   3
  -6 -12   4 17.6512 2.71661   4
   6 -12  -4 12.7728 1.92194   2
  -6 -12   4 10.1535 2.78347   2
  -6  12   4 16.3822 3.11638   3
  -5 -12   4 2.13255 1.47109   4
  -5 -12   4 -1.2968 1.75157   2
   5 -12  -4 1.86655 1.05898   2
  -5  12   4 2.63468 1.74519   3
   4 -12  -4 94.4452 7.44975   4
  -4 -12   4 79.2212 7.40586   2
  -4 -12   4 89.1065 7.17893   4
  -4  12   4 82.6712 7.52718   3
   3 -12  -4 13.3910 1.66826   2
  -3 -12   4 11.8198 2.27216   4
  -3 -12   4 13.5413 2.57509   2
   3 -12  -4 15.6043 2.55244   4
  -3  12   4 8.27288 2.30854   3
   2 -12  -4 31.1972 2.84900   2
  -2 -12   4 32.3558 3.42828   4
   2 -12  -4 34.0650 3.87708   4
  -2 -12   4 31.5316 3.45138   2
  -2  12   4 32.6391 3.68545   3
   1 -12  -4 58.6319 5.32376   4
   1 -12  -4 55.6429 4.51044   2
  -1 -12   4 57.0169 4.85443   2
  -1 -12   4 53.9530 5.14134   4
  -1  12   4 52.2764 5.12545   3
   0 -12   4 111.048 8.00442   2
   0 -12   4 104.152 8.12959   4
   0 -12  -4 95.2727 7.88971   2
   0 -12  -4 114.320 8.57150   4
   0  12   4 92.3792 8.23482   3
   1 -12   4 92.5989 7.47374   4
  -1 -12  -4 87.0482 7.48118   2
   1 -12   4 97.3816 7.30481   2
  -1 -12  -4 103.057 9.03266   4
  -2 -12  -4 57.0355 5.37057   2
  -2 -12  -4 63.5670 5.73020   4
   2 -12   4 60.7558 5.04294   4
   2 -12   4 54.1376 4.79166   2
   3 -12   4 72.7811 6.03237   4
  -3 -12  -4 79.2711 7.03810   4
   3 -12   4 75.9396 5.98043   2
  -3 -12  -4 70.2536 6.55017   2
  -4 -12  -4 39.6883 4.34680   4
   4 -12   4 27.6140 3.27025   4
   4 -12   4 37.8458 3.33801   2
  -5 -12  -4 15.4670 3.20227   2
   5 -12   4 16.0843 2.24253   2
  -5 -12  -4 19.5903 3.40923   4
  -6 -12  -4 3.82392 2.41372   4
   6 -12   4 0.54193 1.05623   2
  -6 -12  -4 -2.7952 2.38370   2
   7 -12   4 61.4105 5.47961   2
  -7 -12  -4 67.7549 7.12317   4
  -7 -12  -4 62.0259 6.81368   2
  -8 -12  -4 12.7566 3.58732   4
   8 -12   4 7.59315 1.88203   2
   9 -12   4 5.94960 2.29692   2
  -9 -12  -4 10.3094 3.87669   4
  10 -12   4 24.3797 3.64518   2
 -10 -12  -4 29.0401 5.68251   4
   9 -13  -4 39.1761 3.68210   2
  -9 -13   4 30.5324 4.61724   4
  -9 -13   4 21.4859 4.72925   2
  -9  13   4 29.9464 5.11451   3
   8 -13  -4 36.2850 3.37485   2
  -8 -13   4 36.6208 5.93450   4
  -8  13   4 21.9728 4.33726   3
  -7 -13   4 1.97585 1.72333   4
   7 -13  -4 2.48500 1.21786   2
  -7 -13   4 3.25833 2.50736   2
  -7  13   4 0.91061 2.53412   3
   6 -13  -4 12.0525 2.09321   2
  -6 -13   4 9.84098 2.93247   2
  -6 -13   4 16.5448 2.85019   4
  -6  13   4 13.5589 3.08739   3
  -5 -13   4 4.53839 2.63329   2
   5 -13  -4 7.05427 1.37626   2
  -5 -13   4 10.1955 2.30277   4
  -5  13   4 4.72463 2.32130   3
  -4 -13   4 13.9276 2.53735   4
  -4 -13   4 6.53031 2.40485   2
   4 -13  -4 17.3610 2.07889   2
   4 -13  -4 13.4396 2.73938   4
  -4  13   4 13.5118 2.98347   3
   3 -13  -4 21.7961 2.29508   2
  -3 -13   4 22.6683 3.24661   2
   3 -13  -4 20.5394 3.28376   4
  -3 -13   4 20.2375 3.05554   4
  -3  13   4 22.7130 3.37161   3
  -2 -13   4 8.31732 2.19878   2
   2 -13  -4 14.6705 1.78461   2
  -2 -13   4 7.88198 1.95420   4
   2 -13  -4 10.2366 2.50538   4
  -2  13   4 10.4518 2.55706   3
   1 -13  -4 16.3175 2.21069   2
  -1 -13   4 14.9681 2.47892   2
  -1 -13   4 15.5285 2.47795   4
   1 -13  -4 17.9650 4.07923   4
  -1  13   4 9.72961 2.61820   3
   0 -13   4 93.8895 7.66430   2
   0 -13  -4 105.624 8.48172   4
   0 -13   4 99.6559 7.87609   4
   0 -13  -4 90.5948 8.10124   2
   1 -13   4 47.9078 4.13636   2
   1 -13   4 44.0843 4.36231   4
  -1 -13  -4 47.5808 5.03014   4
  -1 -13  -4 39.9478 4.41067   2
  -2 -13  -4 58.1398 5.48325   2
   2 -13   4 58.7231 4.91276   2
  -2 -13  -4 62.8965 6.00354   4
   2 -13   4 54.6642 5.20538   4
   3 -13   4 8.09856 1.85144   4
   3 -13   4 10.9714 1.76886   2
  -3 -13  -4 4.21100 2.28522   2
  -3 -13  -4 5.97600 2.48091   4
   4 -13   4 16.8518 2.24690   2
  -4 -13  -4 17.5702 3.60154   4
  -4 -13  -4 9.49613 3.11671   2
   4 -13   4 17.8912 2.49340   4
  -5 -13  -4 7.81325 2.93316   2
  -5 -13  -4 8.83876 2.86726   4
   5 -13   4 3.35472 1.34012   2
  -6 -13  -4 5.51055 3.01300   2
   6 -13   4 7.48949 1.70477   2
  -6 -13  -4 13.1311 3.76509   4
  -7 -13  -4 8.51349 3.15706   2
   7 -13   4 3.14424 1.48524   2
  -7 -13  -4 6.10982 3.23441   4
   8 -13   4 44.2257 6.13803   2
  -9 -13  -4 39.2091 6.41808   4
   9 -13   4 31.4851 3.84285   2
  -8 -14   4 7.52391 2.89627   4
   8 -14  -4 7.17956 1.77551   2
  -8 -14   4 5.48476 3.07223   2
  -8  14   4 4.81380 3.38966   3
  -7 -14   4 35.7564 5.63169   4
  -7 -14   4 21.4916 4.66785   2
   7 -14  -4 37.6652 3.37542   2
  -7  14   4 26.6999 4.99455   3
  -6 -14   4 15.5612 3.90707   2
   6 -14  -4 23.9163 2.56288   2
  -6 -14   4 25.1605 3.83481   4
  -6  14   4 17.3800 3.86489   3
   5 -14  -4 11.9965 1.75727   2
  -5 -14   4 11.6615 2.72538   4
  -5 -14   4 5.07059 2.67353   2
  -5  14   4 4.88026 2.82408   3
   4 -14  -4 1.83081 1.08453   2
  -4 -14   4 3.41907 1.90368   4
  -4 -14   4 1.62178 2.16101   2
   4 -14  -4 0.40633 2.56275   4
  -4  14   4 1.65330 2.48261   3
  -3 -14   4 4.44420 2.27320   2
  -3 -14   4 11.0078 2.36579   4
   3 -14  -4 8.35538 1.51656   2
  -3  14   4 5.89225 2.81264   3
   2 -14  -4 0.18923 1.13633   2
  -2 -14   4 2.07418 1.72163   2
   2 -14  -4 2.62320 2.39980   4
  -2 -14   4 2.11494 1.50245   4
  -2  14   4 -0.6687 2.26405   3
   1 -14  -4 46.7960 5.13712   4
   1 -14  -4 40.9528 4.12515   2
  -1 -14   4 52.7798 4.55011   4
  -1 -14   4 43.1629 4.31167   2
  -1  14   4 33.0813 4.90094   3
   0 -14   4 9.21146 1.85175   2
   0 -14  -4 6.07468 1.76381   2
   0 -14  -4 5.49332 2.62283   4
   0 -14   4 8.58552 2.05705   4
   0  14   4 2.40800 2.30126   3
  -1 -14  -4 21.0202 3.30765   2
  -1 -14  -4 27.7349 4.07835   4
   1 -14   4 22.6222 3.19156   4
   1 -14   4 25.4315 2.85804   2
  -2 -14  -4 -1.6299 2.37821   4
  -2 -14  -4 -0.0269 2.06757   2
   2 -14   4 0.60855 1.17644   2
   2 -14   4 3.73590 1.69346   4
  -3 -14  -4 6.93053 2.73371   4
  -3 -14  -4 4.27441 2.38986   2
   3 -14   4 5.29008 1.53473   2
   3 -14   4 9.54693 2.02109   4
  -4 -14  -4 15.9979 3.93036   2
  -4 -14  -4 19.3615 3.97613   4
   4 -14   4 21.4067 2.54639   2
   5 -14   4 33.0019 3.49761   2
  -5 -14  -4 39.9277 5.54542   4
  -5 -14  -4 30.5533 4.78781   2
   6 -14   4 3.86718 1.59815   2
  -6 -14  -4 5.53237 3.15036   2
  -6 -14  -4 6.41927 3.54006   4
  -7 -14  -4 14.4131 4.47198   4
  -7 -14  -4 12.1574 3.93557   2
   7 -14   4 12.1522 3.72147   2
   8 -14   4 40.1639 4.30195   2
  -8 -14  -4 46.6914 7.01046   4
  -7 -15   4 7.13026 3.11174   2
  -7 -15   4 10.0042 3.06849   4
   7 -15  -4 14.0593 2.11351   2
  -7  15   4 2.87021 3.55545   3
  -6 -15   4 4.83146 2.31255   4
  -6 -15   4 1.87900 2.71655   2
   6 -15  -4 4.05061 1.60142   2
  -6  15   4 0.14472 3.26010   3
  -5 -15   4 9.28199 3.53495   4
  -5 -15   4 -1.5566 2.35185   2
   5 -15  -4 6.36069 1.54827   2
  -5  15   4 4.70375 3.19721   3
   4 -15  -4 13.4329 1.92683   2
  -4 -15   4 15.2897 2.96423   4
  -4 -15   4 9.67058 2.96666   2
   4 -15  -4 8.36749 3.34961   4
  -4  15   4 9.42001 3.66699   3
   3 -15  -4 6.80891 3.08119   4
  -3 -15   4 6.24526 2.15422   4
  -3 -15   4 4.07244 2.03624   2
   3 -15  -4 7.23941 1.59994   2
  -3  15   4 4.55160 3.15126   3
   2 -15  -4 0.02347 2.54284   4
  -2 -15   4 0.06335 1.83653   2
  -2 -15   4 0.75788 1.80329   4
   2 -15  -4 1.10525 1.41857   2
  -2  15   4 0.98805 2.73705   3
  -1 -15   4 31.4816 3.73907   2
   1 -15  -4 31.9718 3.49432   2
   1 -15  -4 33.3594 4.74770   4
   0 -15  -4 40.2877 5.39073   4
   0 -15  -4 39.5752 4.27149   2
   0 -15   4 45.3199 4.66884   4
   0 -15   4 40.8917 4.20393   2
   1 -15   4 66.9270 5.86837   4
   1 -15   4 58.7642 5.32226   2
  -1 -15  -4 53.9836 5.73338   2
  -1 -15  -4 66.9013 6.71616   4
   2 -15   4 0.34236 1.39916   2
  -2 -15  -4 0.03795 2.74845   4
   2 -15   4 2.43134 1.82057   4
  -2 -15  -4 3.71591 2.43525   2
  -3 -15  -4 26.1850 4.32677   2
  -3 -15  -4 33.1516 5.22186   4
   3 -15   4 27.4942 3.95232   4
   3 -15   4 31.5322 3.27440   2
  -4 -15  -4 27.6315 4.70957   4
  -4 -15  -4 23.6137 4.46344   2
   4 -15   4 26.6701 4.00145   4
   4 -15   4 30.7969 3.20625   2
  -5 -15  -4 14.2259 3.67717   2
   5 -15   4 12.4460 2.19146   2
  -5 -15  -4 18.1948 5.18217   4
  -6 -15  -4 6.72934 3.75684   2
  -6 -15  -4 0.56849 3.56027   4
   6 -15   4 1.57910 1.72728   2
   7 -15   4 40.4573 4.30821   2
  -7 -15  -4 46.0467 6.79942   2
  -6 -16   4 2.49159 2.30388   4
  -6 -16   4 -0.2806 3.00845   2
   6 -16  -4 3.98017 1.57766   2
  -5 -16   4 -0.4368 2.55665   4
  -5 -16   4 4.19230 2.83590   2
   5 -16  -4 2.50949 1.64495   2
  -4 -16   4 1.81661 2.56718   4
   4 -16  -4 0.57659 3.27219   4
   4 -16  -4 -0.6811 1.39104   2
  -4 -16   4 1.49380 2.45284   2
  -3 -16   4 2.54901 2.80800   2
   3 -16  -4 0.59943 3.30562   4
   3 -16  -4 4.03105 1.62196   2
  -3 -16   4 1.69922 3.55410   4
  -2 -16   4 3.20440 2.14195   2
   2 -16  -4 3.36889 3.52926   4
   2 -16  -4 7.00623 1.88414   2
  -2 -16   4 10.0883 2.81273   4
   1 -16  -4 8.78884 2.26745   2
  -1 -16   4 4.66068 2.14841   2
   1 -16  -4 10.3325 3.66175   4
  -1 -16   4 9.46140 2.84000   4
   0 -16   4 52.0431 5.42746   2
   0 -16   4 64.7038 6.03664   4
   0 -16  -4 68.6951 7.04862   4
   0 -16  -4 56.3981 5.67363   2
   1 -16   4 7.36413 2.02477   2
  -1 -16  -4 3.52414 2.62050   2
  -1 -16  -4 5.65430 3.47683   4
   1 -16   4 6.45232 2.63401   4
  -2 -16  -4 18.7395 3.86389   2
   2 -16   4 26.4274 3.78399   4
   2 -16   4 23.9403 3.08042   2
  -2 -16  -4 18.3924 4.31706   4
   3 -16   4 3.82771 1.68565   2
  -3 -16  -4 2.74982 4.25889   4
  -3 -16  -4 -0.3124 2.85793   2
   3 -16   4 2.02282 2.39777   4
   4 -16   4 9.88299 3.42898   4
  -4 -16  -4 17.2383 4.73847   4
   4 -16   4 10.7899 2.50732   2
  -4 -16  -4 10.4458 3.62353   2
   5 -16   4 31.8996 3.68060   2
  -5 -16  -4 29.3101 6.15338   4
  -5 -16  -4 32.1976 5.30222   2
  -6 -16  -4 9.54514 6.63159   2
   6 -16   4 4.45896 1.98335   2
  -4 -17   4 15.2181 3.70056   4
  -4 -17   4 12.4244 3.39715   2
   4 -17  -4 16.5620 2.61186   2
   4 -17  -4 15.9145 4.33835   4
  -3 -17   4 8.99287 2.85704   2
   3 -17  -4 12.3437 4.44725   4
   3 -17  -4 8.21426 2.16243   2
  -3 -17   4 12.7400 3.30176   4
  -2 -17   4 -0.0396 2.32783   2
   2 -17  -4 4.60688 3.58838   4
  -2 -17   4 1.82355 2.43183   4
   2 -17  -4 3.48559 2.04261   2
   1 -17  -4 -0.4589 3.47374   4
  -1 -17   4 1.82131 2.16657   2
   1 -17  -4 5.51054 2.36132   2
   0 -17   4 49.8046 5.24722   2
   0 -17   4 48.7633 5.77722   4
   0 -17  -4 55.9885 5.62168   2
   0 -17  -4 55.3108 7.43506   4
   1 -17   4 21.8621 3.28514   2
  -1 -17  -4 19.2745 3.75469   2
   1 -17   4 17.5613 3.90567   4
  -2 -17  -4 5.37436 3.98164   4
   2 -17   4 9.10141 2.90141   4
  -2 -17  -4 4.77156 3.12453   2
   2 -17   4 7.46922 2.17270   2
  -3 -17  -4 2.54394 3.36507   2
   3 -17   4 -2.9006 1.64561   2
   3 -17   4 0.11547 3.30924   4
   4 -17   4 15.6461 4.29689   4
  -4 -17  -4 11.2473 3.76374   2
   4 -17   4 13.4479 2.51801   2
 -13   0   5 1.01733 2.40365   3
 -12   0   5 -1.2786 1.94236   3
 -11   0   5 -0.9829 1.49236   3
 -10   0   5 -1.1771 1.35543   3
  -9   0   5 -1.2533 1.23014   3
  -8   0   5 -0.1188 1.21929   3
  -7   0   5 1.70863 1.14358   3
  -6   0   5 1.47545 0.92515   3
  -5   0   5 0.48004 0.83245   3
   4   0  -5 -0.0304 0.74869   2
  -4   0   5 -0.8898 0.80080   3
   4   0  -5 0.58806 0.75127   3
  -3   0   5 1.35755 0.55211   2
  -3   0   5 1.38764 0.64715   3
   3   0  -5 3.21603 0.71797   2
   3   0  -5 1.42886 0.61319   3
  -2   0   5 0.34483 0.39337   2
   2   0  -5 0.24454 0.31650   2
  -2   0   5 0.48149 0.37885   3
   2   0  -5 0.80979 0.51452   3
  -1   0   5 0.41269 0.40774   3
   1   0  -5 0.86851 0.21812   2
  -1   0   5 0.13862 0.25565   2
   1   0  -5 0.12492 0.41122   3
   0   0   5 0.25806 0.44862   4
   0   0  -5 0.43525 0.17068   2
   0   0   5 -0.0096 0.26230   3
  -1   0  -5 0.40459 0.46152   4
   1   0   5 0.53517 0.19224   5
   1   0   5 0.02474 0.45062   4
   1   0   5 1.13527 0.25837   2
  -2   0  -5 1.10223 0.61028   4
   3   0   5 0.96860 0.67449   4
  -3   0  -5 0.22468 0.30634   5
  -3   0  -5 -0.4158 0.56493   4
   4   0   5 0.01162 0.61765   4
  -4   0  -5 0.07435 0.69857   4
  -4   0  -5 0.17615 0.38451   5
  -5   0  -5 -1.0072 0.75332   4
   5   0   5 1.11750 0.69200   4
   6   0   5 0.04227 0.64835   4
  -6   0  -5 0.76608 0.92159   4
 -13   1   5 9.09225 3.08808   3
 -12  -1   5 42.1221 4.97126   3
 -12   1   5 44.0942 4.94251   3
 -11  -1   5 -0.4095 1.60737   3
 -11   1   5 0.48956 1.72302   3
 -10  -1   5 50.4634 4.43063   3
 -10   1   5 46.1414 4.59086   3
  -9  -1   5 86.2698 6.92945   3
  -9   1   5 85.1895 7.11282   3
  -8  -1   5 91.5353 7.16407   3
  -8   1   5 87.0331 7.25528   3
  -7  -1   5 11.2057 1.93251   3
  -7   1   5 10.6268 1.93059   3
  -6  -1   5 487.758 34.8018   3
  -6   1   5 486.635 34.8551   3
  -5  -1   5 200.913 14.6899   3
  -5   1   5 197.498 14.7496   3
   4  -1  -5 11.5454 1.59725   2
  -4  -1   5 10.9497 1.51659   3
  -4  -1   5 13.4388 1.95724   2
   4   1  -5 9.87840 1.55540   3
  -4   1   5 11.9995 1.64815   3
  -3  -1   5 289.019 18.3677   3
   3  -1  -5 250.605 18.3165   3
   3  -1  -5 224.998 17.9523   2
  -3  -1   5 238.783 18.0684   2
   3   1  -5 238.572 17.9732   2
  -3   1   5 253.259 18.1647   4
   3   1  -5 276.519 18.3143   3
   2  -1  -5 49.2815 3.92755   3
  -2  -1   5 50.0552 3.87861   3
   2  -1  -5 40.1926 3.48968   2
  -2  -1   5 40.0991 3.57901   2
  -2   1   5 44.5662 3.81656   4
  -2   1   5 51.3161 3.99153   3
   2   1  -5 49.6000 3.54476   2
   2   1  -5 58.6990 4.20146   3
  -1  -1   5 1785.83 129.351   3
   1  -1  -5 1786.66 129.397   4
  -1  -1   5 1818.25 129.030   2
   1  -1  -5 1884.44 129.502   3
  -1   1   5 1923.14 129.479   3
   1   1  -5 1878.72 128.998   2
   1   1  -5 1924.43 129.388   3
  -1   1   5 1767.96 129.373   4
   0  -1  -5 93.8570 6.67076   3
   0  -1   5 86.3849 6.25981   2
   0  -1  -5 85.1855 6.69463   4
   0   1   5 91.7272 6.65680   3
   0   1   5 89.3513 6.68244   4
   0   1  -5 82.7000 6.27217   2
  -1  -1  -5 323.088 22.2594   4
   1  -1   5 281.414 22.1157   4
   1  -1   5 299.767 21.8079   2
   1  -1   5 280.852 21.7571   5
   1   1   5 324.005 22.1363   3
   1   1   5 352.231 21.8699   5
   2  -1   5 3.15461 0.78570   4
  -2  -1  -5 3.81450 0.51311   5
  -2  -1  -5 2.13664 0.75222   4
   2   1   5 3.15868 0.82614   4
  -2   1  -5 4.05285 0.50269   5
  -3  -1  -5 136.625 9.98755   4
  -3  -1  -5 132.783 9.63073   5
  -3   1  -5 134.007 9.94523   4
   3   1   5 129.451 9.78187   4
  -4  -1  -5 110.829 8.55824   5
  -4  -1  -5 125.272 8.76514   4
   4  -1   5 112.757 8.45449   4
   4   1   5 107.035 8.39896   4
  -4   1  -5 115.634 8.63452   4
  -5  -1  -5 105.695 8.77567   5
  -5  -1  -5 129.458 9.11636   4
  -5   1  -5 121.089 9.00719   4
  -6  -1  -5 236.714 18.9971   5
  -6  -1  -5 291.565 19.3486   4
  -7  -1  -5 5.69880 1.61285   4
  -8  -1  -5 10.4298 2.03544   4
 -11  -1  -5 0.89621 1.31090   5
 -12  -1  -5 28.1351 3.61975   5
 -13  -1  -5 23.4012 4.45226   5
 -13   2   5 36.5396 5.08841   3
 -12  -2   5 7.43389 2.23080   3
 -12   2   5 10.4332 2.61191   3
 -11  -2   5 35.5776 3.70239   3
 -11   2   5 34.6902 4.16978   3
 -10  -2   5 23.1634 2.69454   3
 -10   2   5 22.5875 3.13626   3
  -9  -2   5 90.2074 7.33589   3
  -9   2   5 98.1098 7.76216   3
  -8  -2   5 3.74904 1.21242   4
  -8  -2   5 5.15475 1.35921   3
  -8   2   5 7.57574 1.67401   3
  -7  -2   5 109.028 8.02398   3
  -7  -2   5 95.6251 7.72826   4
  -7   2   5 105.405 8.19067   3
  -6  -2   5 74.4279 6.27218   4
  -6  -2   5 91.2045 6.65973   3
  -6   2   5 84.9398 6.72497   3
  -5  -2   5 101.338 7.59454   3
  -5  -2   5 87.9235 7.58365   2
   5   2  -5 92.3378 7.56521   3
  -5   2   5 109.526 7.78086   3
  -4  -2   5 4.04293 0.89388   3
   4  -2  -5 3.17289 0.83365   2
  -4  -2   5 4.21899 1.12253   2
  -4   2   5 3.35563 1.00430   3
   4   2  -5 2.72875 0.90484   3
   3  -2  -5 130.020 10.2552   2
  -3  -2   5 129.463 10.3788   2
  -3  -2   5 154.779 10.5658   3
  -3   2   5 145.976 10.4496   4
   3   2  -5 142.164 10.2871   2
   3   2  -5 151.106 10.6203   3
   2  -2  -5 172.996 12.4304   4
  -2  -2   5 154.690 12.2023   2
   2  -2  -5 169.830 12.5247   3
  -2  -2   5 166.247 12.3982   3
   2  -2  -5 155.719 12.0822   2
   2   2  -5 197.710 12.2483   2
  -2   2   5 175.725 12.4261   4
  -1  -2   5 205.789 14.3268   2
   1  -2  -5 194.499 14.6562   4
   1  -2  -5 203.956 14.6974   3
  -1  -2   5 182.310 14.5678   3
  -1   2   5 208.801 14.7869   3
  -1   2   5 203.624 14.6517   4
   1   2  -5 215.357 14.3084   2
   0  -2   5 2624.65 196.100   2
   0  -2  -5 2771.02 196.510   4
   0  -2  -5 2904.08 196.486   3
   0   2   5 2931.34 196.531   3
  -1  -2  -5 341.621 24.3195   4
  -1  -2  -5 363.413 24.2251   3
   1  -2   5 314.341 23.9112   2
   1   2   5 334.495 24.2293   4
   1   2   5 346.488 24.2187   3
  -2  -2  -5 38.3632 3.05208   4
   2  -2   5 31.8885 2.94449   4
   2  -2   5 34.1969 2.60968   2
   2   2   5 30.9206 2.61991   5
  -2   2  -5 29.5195 2.48527   5
   2   2   5 33.7366 2.86227   4
   2   2   5 36.7169 2.81932   3
  -3  -2  -5 185.575 12.9301   4
   3  -2   5 170.105 12.8754   4
  -3  -2  -5 182.098 12.5738   5
   3   2   5 162.320 12.6514   4
  -4  -2  -5 7.26722 1.12672   5
  -4  -2  -5 7.63411 1.46679   4
  -5  -2  -5 48.2505 4.04225   4
  -5  -2  -5 42.1946 3.68112   5
  -6  -2  -5 118.818 8.73694   4
  -6  -2  -5 104.832 8.47596   5
  -7  -2  -5 186.297 14.4267   5
  -7  -2  -5 204.785 14.6525   4
  -8  -2  -5 26.2809 3.28694   4
  -8  -2  -5 26.5914 2.83006   5
  -9  -2  -5 61.4575 5.71609   5
  -9  -2  -5 73.5386 6.15617   4
 -10  -2  -5 1.51021 1.16864   5
 -11  -2  -5 141.813 11.2055   5
 -12  -2  -5 9.40446 2.26599   5
 -13  -2  -5 19.7027 3.31420   5
 -13   3   5 16.7561 3.89828   3
 -12  -3   5 44.1247 4.52064   3
 -12   3   5 52.5285 5.54209   3
 -11  -3   5 63.4875 5.50588   3
 -11   3   5 66.6701 6.18378   3
 -10  -3   5 125.129 8.55370   4
 -10  -3   5 104.643 8.40891   3
 -10   3   5 99.1159 8.90667   3
  -9  -3   5 147.048 10.9159   3
  -9  -3   5 152.347 10.9951   4
  -9   3   5 139.075 11.4258   3
  -8  -3   5 87.0425 6.69179   3
  -8  -3   5 82.2236 6.60802   4
  -8   3   5 86.2800 7.03057   3
  -7  -3   5 67.5086 5.08003   3
  -7  -3   5 56.1970 4.89867   4
  -7   3   5 59.1583 5.33277   3
  -6  -3   5 96.5824 9.07350   2
  -6  -3   5 110.670 8.73863   4
  -6  -3   5 141.721 9.37330   3
   6   3  -5 114.852 9.06955   3
  -6   3   5 126.068 9.20482   3
  -5  -3   5 10.0010 1.73084   2
  -5  -3   5 8.28285 1.39848   4
  -5  -3   5 10.4703 1.58713   3
  -5   3   5 11.3358 1.72823   3
   5   3  -5 7.19792 1.41446   3
  -4  -3   5 490.389 31.9850   3
  -4  -3   5 398.056 31.9077   2
   4   3  -5 455.821 31.9287   3
  -3  -3   5 146.306 12.3902   2
   3  -3  -5 159.514 12.4182   4
  -3  -3   5 179.281 12.5227   3
  -3   3   5 202.127 12.8970   3
   2  -3  -5 131.228 11.1280   3
  -2  -3   5 142.647 10.8745   2
  -2  -3   5 154.875 11.0537   3
   2  -3  -5 147.037 11.0534   4
  -2   3   5 162.253 11.0659   4
   2   3  -5 171.535 10.8203   2
  -2   3   5 140.671 11.6478   3
  -1  -3   5 164.692 11.7240   2
   1  -3  -5 151.764 12.0015   4
   1  -3  -5 146.360 12.0376   3
  -1   3   5 180.113 12.0568   4
  -1   3   5 160.652 12.1851   3
   1   3  -5 181.230 11.7290   2
   0  -3   5 17.5154 1.39708   2
   0  -3  -5 16.1704 1.81074   4
   0   3  -5 15.9809 1.41401   2
   0   3   5 16.9401 1.74267   4
   0   3   5 16.4028 1.79369   3
   1  -3   5 796.653 57.8219   2
  -1  -3  -5 826.910 58.2043   4
  -1  -3  -5 871.861 58.1143   3
   1   3   5 910.082 58.1831   3
  -1   3  -5 759.961 57.8326   2
   1   3   5 774.706 57.7365   2
   1   3   5 838.890 58.0904   4
  -2  -3  -5 74.6145 5.89315   4
   2  -3   5 76.4175 5.55651   2
   2   3   5 74.4292 5.56133   2
   2   3   5 72.3335 5.57010   5
   2   3   5 73.2098 5.71946   4
   2   3   5 77.7644 5.72405   3
  -3  -3  -5 27.8538 2.28702   5
   3  -3   5 25.9904 2.28817   2
   3   3   5 26.9363 2.37198   3
   3   3   5 28.2952 2.52140   2
  -4  -3  -5 469.864 32.3747   5
  -4  -3  -5 434.239 32.5899   4
   4   3   5 465.859 32.3915   3
  -5  -3  -5 159.208 12.0453   4
  -5  -3  -5 162.705 11.8440   5
  -6  -3  -5 150.958 11.1035   4
  -6  -3  -5 140.621 10.8658   5
  -7  -3  -5 6.38209 1.32663   5
  -7  -3  -5 9.55560 1.92523   4
   7   3   5 5.40579 1.09837   3
  -8  -3  -5 27.7896 2.94226   5
  -8  -3  -5 28.5750 3.50353   4
  -9  -3  -5 24.2054 3.28984   4
  -9  -3  -5 18.6093 2.52552   5
 -10  -3  -5 70.9270 6.13746   4
 -10  -3  -5 54.2074 5.35999   5
 -11  -3  -5 25.7838 3.27173   5
 -12  -3  -5 19.1275 3.02706   5
 -13  -3  -5 37.8832 4.35830   5
 -13   4   5 5.10782 2.90733   3
 -12   4   5 22.0327 3.87067   3
 -11  -4   5 29.4704 3.26349   4
 -11   4   5 23.9832 3.79052   3
 -10  -4   5 7.59225 1.48834   3
 -10  -4   5 8.03945 1.76791   4
 -10   4   5 6.81339 2.16148   3
  -9  -4   5 16.2459 2.33563   4
  -9  -4   5 13.4593 1.81899   3
  -9   4   5 14.1716 2.41674   3
  -8  -4   5 115.933 9.08060   4
  -8  -4   5 125.989 8.99935   3
  -8   4   5 116.292 9.47235   3
  -7  -4   5 60.1795 5.09103   4
  -7  -4   5 72.9708 5.41439   3
  -7  -4   5 53.0781 5.59352   2
   7   4  -5 62.6539 5.72672   3
  -7   4   5 62.6008 5.47424   3
  -6  -4   5 82.0748 7.77395   2
  -6  -4   5 104.857 7.53419   3
  -6  -4   5 91.8937 7.34948   4
   6   4  -5 98.7353 7.52437   3
  -6   4   5 104.378 7.81160   3
  -5  -4   5 33.9685 3.60764   2
  -5  -4   5 36.6325 3.33179   4
  -5  -4   5 38.9794 3.41941   3
  -5   4   5 45.7613 3.72602   3
  -4  -4   5 189.408 14.7256   2
  -4  -4   5 215.853 14.6508   3
  -4  -4   5 171.899 14.4643   4
  -4   4   5 229.229 15.0079   3
  -3  -4   5 161.351 12.6763   4
  -3  -4   5 164.362 12.7859   2
  -3  -4   5 189.049 12.8213   3
   3  -4  -5 175.724 12.7814   4
  -3   4   5 186.765 13.1454   3
  -2  -4   5 13.3412 1.38918   3
   2  -4  -5 11.4197 1.02353   2
   2  -4  -5 12.0587 1.48979   4
  -2  -4   5 11.9912 1.36282   2
  -2   4   5 14.2785 1.55063   4
  -2   4   5 12.8018 1.70636   3
   1  -4  -5 109.214 9.32194   3
   1  -4  -5 129.805 9.31792   4
  -1   4   5 139.061 9.24688   4
  -1   4   5 120.071 9.43492   3
   0  -4  -5 327.553 24.9135   3
   0  -4   5 353.760 24.7235   2
   0  -4  -5 349.968 24.9686   4
   0   4   5 365.166 24.8616   4
   0   4   5 343.383 25.0260   3
   0   4  -5 353.040 24.6465   2
  -1  -4  -5 564.615 39.7126   3
   1  -4   5 562.402 39.5866   2
  -1  -4  -5 506.693 39.4087   2
  -1  -4  -5 568.645 39.8385   4
   1   4   5 606.438 39.3433   2
   1   4   5 559.659 39.7994   3
  -2  -4  -5 229.747 17.6886   2
   2  -4   5 247.361 17.6866   2
  -2  -4  -5 249.628 18.0251   4
  -2  -4  -5 255.128 17.8184   3
   2   4   5 276.658 17.9339   3
   2   4   5 233.984 17.6326   2
   3  -4   5 380.860 27.2307   2
  -3  -4  -5 376.287 27.5076   4
   3   4   5 419.095 27.3287   3
   3   4   5 360.019 27.2555   2
  -4  -4  -5 105.546 8.19112   4
   4  -4   5 103.417 7.91525   2
  -4  -4  -5 108.047 7.90560   5
   4   4   5 107.417 7.86892   3
  -5  -4  -5 189.680 14.8929   4
  -5  -4  -5 211.150 14.7169   5
   5  -4   5 186.246 14.6589   2
   5   4   5 218.912 14.6018   3
  -6  -4  -5 199.557 15.2014   4
  -6  -4  -5 209.647 15.0273   5
  -7  -4  -5 28.9826 2.90084   5
  -7  -4  -5 27.9664 3.36064   4
  -8  -4  -5 25.9940 3.48432   4
  -8  -4  -5 28.2584 3.02057   5
  -9  -4  -5 50.6541 4.90148   5
  -9  -4  -5 58.6853 5.39561   4
 -10  -4  -5 1.34658 1.13489   5
 -10  -4  -5 2.58710 2.24187   4
 -11  -4  -5 28.1851 3.44999   5
 -11  -4  -5 27.4943 4.24938   4
 -12  -4  -5 28.8036 5.98560   4
 -12  -4  -5 30.1520 3.69889   5
 -13  -4  -5 1.64873 1.50237   5
 -12  -5   5 28.2046 3.91543   4
 -12   5   5 27.8158 4.56131   3
 -11   5   5 17.2602 3.16644   3
 -10  -5   5 5.83765 1.80003   4
 -10   5   5 3.45612 1.84855   3
  -9  -5   5 17.7503 2.52255   4
  -9   5   5 14.2282 2.55572   3
  -8  -5   5 13.1798 2.79279   2
  -8  -5   5 19.9958 2.39722   4
  -8   5   5 15.6921 2.60948   3
  -7  -5   5 1.37569 0.98146   3
  -7  -5   5 0.32186 1.56174   2
  -7  -5   5 3.66243 1.15726   4
  -7   5   5 0.71646 1.08878   3
  -6  -5   5 4.74995 1.19059   3
  -6  -5   5 5.85536 1.35239   4
  -6  -5   5 4.78365 1.78524   2
  -6   5   5 6.74430 1.62890   3
  -5  -5   5 112.848 9.09521   4
  -5  -5   5 128.076 9.17961   3
  -5  -5   5 104.901 9.39083   2
  -5   5   5 143.735 9.63606   3
  -4  -5   5 49.9107 3.96291   3
  -4  -5   5 42.6400 4.11259   2
  -4  -5   5 46.9569 3.95238   4
  -4   5   5 50.3191 4.25643   3
   3  -5  -5 88.7505 6.38912   2
   3  -5  -5 75.0670 6.68141   4
  -3  -5   5 88.3916 6.71377   4
  -3  -5   5 89.4097 6.72341   3
  -3  -5   5 86.6172 6.80032   2
  -3   5   5 86.2545 6.98868   3
  -3   5   5 100.802 6.63162   4
  -2  -5   5 63.6282 5.04714   5
   2  -5  -5 68.9639 4.99868   2
  -2  -5   5 75.4572 5.35616   2
   2  -5  -5 71.6026 5.48368   4
  -2  -5   5 64.4902 5.34482   4
  -2   5   5 63.8993 5.61351   3
  -2   5   5 78.2455 5.36775   4
   1  -5  -5 124.057 9.59759   4
   1  -5  -5 132.630 9.09963   2
  -1  -5   5 130.784 9.32255   2
  -1   5   5 119.544 9.70110   3
  -1   5   5 133.910 9.47907   4
   0  -5  -5 109.267 7.84035   2
   0  -5   5 113.134 7.94249   2
   0  -5  -5 105.315 8.28905   3
   0   5   5 109.285 8.35077   3
  -1  -5  -5 50.2795 4.22290   3
  -1  -5  -5 47.4642 3.96291   2
  -1  -5  -5 51.3937 4.35465   4
   1  -5   5 51.3530 3.98547   2
   1   5   5 58.0566 3.84957   2
   1   5   5 56.0706 4.40014   3
   2  -5   5 4.04388 0.78835   2
  -2  -5  -5 4.64766 1.07562   4
  -2  -5  -5 5.22974 0.97546   3
  -2  -5  -5 4.02998 0.82070   2
   2   5   5 4.01839 0.96711   3
  -3  -5  -5 55.7515 4.72287   4
  -3  -5  -5 53.6183 4.51313   2
   3  -5   5 58.1389 4.39755   2
   3   5   5 57.0119 4.49048   3
   4  -5   5 198.785 14.2582   2
  -4  -5  -5 214.256 14.2681   5
  -4  -5  -5 175.658 14.4393   4
  -5  -5  -5 13.0435 2.01474   4
   5  -5   5 11.3045 1.60591   2
  -5  -5  -5 14.3252 1.55580   5
  -6  -5  -5 55.0391 4.85953   4
   6  -5   5 52.2056 4.55857   2
  -6  -5  -5 56.6570 4.57700   5
  -7  -5  -5 51.6733 4.45124   5
  -7  -5  -5 54.5207 4.90266   4
   7  -5   5 47.3476 4.42821   2
  -8  -5  -5 87.5971 6.88529   5
  -8  -5  -5 78.2770 7.14772   4
  -9  -5  -5 198.634 15.4787   4
  -9  -5  -5 205.811 15.2512   5
 -10  -5  -5 14.8187 3.23403   4
 -10  -5  -5 14.2486 2.53867   5
 -11  -5  -5 50.1945 5.83325   4
 -11  -5  -5 47.0319 4.77696   5
 -12  -5  -5 5.50514 1.79552   5
 -12  -5  -5 1.98957 3.28920   4
 -13  -5  -5 22.2033 3.40957   5
 -13  -6   5 7.47696 2.96723   4
 -13  -6   5 6.44141 2.05603   5
 -13   6   5 9.66116 3.47770   3
 -12  -6   5 16.2029 3.03730   4
 -12   6   5 7.40270 3.29771   3
 -11  -6   5 63.9371 5.43504   4
 -11   6   5 48.4651 5.84818   3
 -10  -6   5 21.6289 3.02276   4
 -10   6   5 17.2466 2.90434   3
  -9  -6   5 8.01767 2.01377   4
  -9   6   5 6.43690 2.01179   3
  -8  -6   5 1.56730 1.94564   2
  -8  -6   5 5.28039 1.56847   4
  -8   6   5 3.40608 1.62081   3
  -7  -6   5 12.2186 2.02922   4
  -7   6   5 12.5625 2.18451   3
  -6  -6   5 18.8300 2.33677   4
  -6  -6   5 20.5394 2.81343   2
  -6   6   5 21.7673 2.51208   3
   5  -6  -5 62.4054 4.95628   2
  -5  -6   5 62.0368 5.21510   4
  -5  -6   5 63.3922 5.11788   3
  -5  -6   5 63.4597 5.61716   2
  -5   6   5 74.7098 5.68530   3
  -4  -6   5 50.4088 4.62250   2
  -4  -6   5 57.0797 4.39159   3
   4  -6  -5 56.4946 4.11284   2
  -4  -6   5 46.7330 4.17166   5
  -4  -6   5 55.2534 4.44080   4
  -4   6   5 56.9673 4.74076   3
  -3  -6   5 92.4300 7.16510   5
   3  -6  -5 92.6709 7.08566   2
  -3  -6   5 94.8818 7.42467   3
   3  -6  -5 99.3475 7.49975   4
  -3  -6   5 97.0508 7.45006   4
  -3  -6   5 95.0450 7.52711   2
  -3   6   5 112.341 7.85549   3
  -3   6   5 104.384 7.27611   4
  -2  -6   5 128.577 8.69486   5
   2  -6  -5 120.139 8.65022   2
  -2  -6   5 126.063 9.00559   2
  -2  -6   5 115.512 9.01289   4
   2  -6  -5 122.430 9.16298   4
  -2   6   5 113.565 9.25711   3
   1  -6  -5 38.8598 2.68095   2
   1  -6  -5 37.5539 3.30827   4
  -1  -6   5 33.5163 3.07378   4
  -1  -6   5 37.9639 2.92696   2
  -1   6   5 29.8247 2.66671   2
  -1   6   5 38.0193 3.35145   3
   0  -6  -5 225.788 18.4161   3
   0  -6  -5 265.055 17.5969   2
   0  -6   5 259.266 17.6830   2
   0  -6   5 234.982 17.8190   4
   0  -6  -5 255.061 18.0492   4
   0   6   5 244.451 18.1693   3
   0   6   5 249.176 17.5141   2
  -1  -6  -5 18.2924 2.07001   3
   1  -6   5 20.5181 1.75874   2
  -1  -6  -5 16.5428 1.78334   2
  -1  -6  -5 21.6677 2.29152   4
   1   6   5 18.6858 2.12759   3
   1   6   5 20.5792 1.70598   2
  -2  -6  -5 221.986 16.1175   4
   2  -6   5 222.439 15.7607   2
  -2  -6  -5 211.194 15.8038   2
  -2  -6  -5 210.341 15.8837   3
   2   6   5 237.383 15.6384   2
   2   6   5 214.815 15.9399   3
  -3  -6  -5 48.9919 4.22677   4
   3  -6   5 48.2935 3.81497   2
  -3  -6  -5 46.7901 3.97483   2
   3   6   5 46.1533 3.87934   3
  -4  -6  -5 129.502 9.73452   4
  -4  -6  -5 115.137 9.52891   2
   4  -6   5 133.969 9.42574   2
  -5  -6  -5 14.1566 1.68326   5
  -5  -6  -5 16.4568 2.31396   4
   5  -6   5 14.1454 1.79628   2
  -6  -6  -5 38.0161 3.97123   4
   6  -6   5 38.4493 3.55931   2
  -6  -6  -5 41.5072 3.53416   5
   7  -6   5 47.2324 5.57744   2
  -7  -6  -5 54.3590 4.53606   5
  -7  -6  -5 51.9386 5.00772   4
   8  -6   5 170.889 13.3035   2
  -8  -6  -5 170.766 13.6157   4
  -8  -6  -5 186.722 13.3435   5
   9  -6   5 29.0983 3.43062   2
  -9  -6  -5 33.3428 3.39294   5
  10  -6   5 35.3375 4.00279   2
 -10  -6  -5 42.0742 4.11852   5
 -10  -6  -5 43.5729 5.03506   4
 -11  -6  -5 29.1667 3.45007   5
  11  -6   5 31.4336 3.60490   2
 -11  -6  -5 25.9281 4.34327   4
 -12  -6  -5 30.4535 5.02570   4
  12  -6   5 26.1934 3.60778   2
 -12  -6  -5 30.4635 3.84444   5
 -12  -7   5 6.45689 2.61366   4
 -12  -7   5 2.98910 1.79244   5
 -12   7   5 7.91158 3.55481   3
 -11  -7   5 56.1590 5.07722   4
 -11  -7   5 40.0872 4.51791   5
 -11   7   5 41.0616 5.31967   3
 -10  -7   5 11.6060 2.34279   4
 -10  -7   5 7.33447 1.87174   5
 -10   7   5 4.81176 2.09478   3
  -9  -7   5 20.5448 2.77691   4
  -9  -7   5 9.61048 2.81314   2
  -9  -7   5 11.8106 2.13216   5
  -9   7   5 13.3123 2.40122   3
  -8  -7   5 41.2008 4.63001   2
  -8  -7   5 27.9125 3.29613   5
  -8  -7   5 42.2471 3.87360   4
  -8   7   5 32.9777 3.76966   3
  -7  -7   5 7.43768 1.51733   5
  -7  -7   5 7.58045 1.63244   4
  -7  -7   5 4.81020 2.09691   2
   7  -7  -5 7.27040 1.35796   2
  -7   7   5 5.44889 1.64642   3
  -6  -7   5 22.9352 3.57660   2
  -6  -7   5 34.0351 3.05680   4
  -6  -7   5 24.1280 2.69092   5
   6  -7  -5 30.3014 2.62382   2
  -6   7   5 30.5197 3.21225   3
  -5  -7   5 2.47354 1.51115   2
   5  -7  -5 5.63916 0.98049   2
  -5  -7   5 2.39674 0.77637   5
  -5  -7   5 3.63883 1.18973   4
  -5   7   5 3.56690 1.34884   3
  -4  -7   5 165.555 12.6789   5
  -4  -7   5 173.311 12.8334   3
  -4  -7   5 170.401 13.1669   2
   4  -7  -5 174.973 12.6048   2
  -4  -7   5 180.851 12.9279   4
  -4   7   5 190.874 13.3598   3
  -3  -7   5 94.8259 7.80959   2
  -3  -7   5 103.421 7.75409   4
  -3  -7   5 108.233 7.42650   5
  -3  -7   5 100.934 7.70381   3
  -3   7   5 97.5299 8.04050   3
   2  -7  -5 1.86404 0.44419   2
  -2  -7   5 1.78018 0.81309   4
   2  -7  -5 0.59887 0.87179   4
  -2  -7   5 0.97567 0.82090   2
  -2   7   5 0.32770 0.86226   3
   1  -7  -5 33.3477 2.25464   2
  -1  -7   5 28.2233 2.63708   4
   1  -7  -5 25.9749 2.77013   4
  -1  -7   5 29.6761 2.47734   2
  -1   7   5 24.2078 2.21519   2
  -1   7   5 25.7355 2.69980   3
   0  -7   5 60.8753 5.01401   4
   0  -7   5 64.4442 4.83538   2
   0  -7  -5 64.9101 5.26643   4
   0  -7  -5 70.2034 4.79542   2
   0   7   5 56.4931 5.11222   3
   0   7   5 62.2313 4.66227   2
  -1  -7  -5 58.6014 4.91748   4
   1  -7   5 60.7049 4.70943   4
  -1  -7  -5 55.9452 4.84635   3
   1  -7   5 59.4365 4.48314   2
  -1  -7  -5 53.9932 4.51879   2
   1   7   5 63.3750 4.33254   2
   1   7   5 53.2179 4.84375   3
  -2  -7  -5 6.06010 1.28301   4
   2  -7   5 5.38244 0.93818   2
   2  -7   5 5.56750 1.18288   4
  -2  -7  -5 3.15643 0.99028   3
  -2  -7  -5 5.67525 1.21764   2
   2   7   5 3.08540 1.00475   3
   3  -7   5 32.4345 2.64482   2
   3  -7   5 29.5862 2.73168   4
  -3  -7  -5 28.5321 3.14422   4
  -3  -7  -5 25.8510 2.83891   2
  -4  -7  -5 195.533 15.3886   2
   4  -7   5 216.409 15.2451   2
  -4  -7  -5 216.459 15.6170   4
  -5  -7  -5 8.66586 1.92582   4
   5  -7   5 6.21958 1.33424   2
   6  -7   5 74.8435 6.30762   2
  -6  -7  -5 73.2525 6.73827   4
  -6  -7  -5 88.0882 6.35666   5
   7  -7   5 78.2804 6.27196   2
  -7  -7  -5 67.4927 6.60411   4
  -7  -7  -5 81.7590 6.30310   5
  -8  -7  -5 16.8285 4.76611   4
  -8  -7  -5 18.1748 2.31825   5
   8  -7   5 19.0556 2.73803   2
  -9  -7  -5 0.14550 0.78315   5
   9  -7   5 0.73821 1.14085   2
  -9  -7  -5 1.04365 2.23672   4
  10  -7   5 43.7729 4.42362   2
 -10  -7  -5 44.5872 4.37648   5
 -10  -7  -5 39.1215 5.44306   4
 -11  -7  -5 23.9082 3.50825   5
  11  -7   5 33.1392 3.75572   2
 -11  -7  -5 39.0663 5.18169   4
 -12  -7  -5 50.5689 5.01516   5
 -12  -7  -5 38.9393 6.08628   4
  12  -7   5 51.6800 5.17949   2
  12  -8  -5 0.12429 1.44251   2
 -12  -8   5 -2.2348 2.28097   4
 -12  -8   5 -2.8748 1.70973   5
 -12   8   5 0.46656 2.76588   3
 -11  -8   5 7.87386 2.45795   4
  11  -8  -5 9.33843 2.06722   2
 -11  -8   5 8.22216 1.90022   5
 -11   8   5 1.70392 2.33423   3
  10  -8  -5 18.3542 2.50758   2
 -10  -8   5 19.8212 3.14044   4
 -10  -8   5 16.8530 2.69337   5
 -10   8   5 11.6664 3.00225   3
  -9  -8   5 13.1624 2.24545   5
   9  -8  -5 14.3637 2.15922   2
  -9  -8   5 18.0679 2.71099   4
  -9  -8   5 6.12023 2.78953   2
  -9   8   5 10.4621 2.45608   3
  -8  -8   5 13.4761 3.43265   2
  -8  -8   5 24.4902 2.87834   4
   8  -8  -5 18.1733 2.61628   2
  -8   8   5 16.7059 2.75712   3
  -7  -8   5 82.4662 7.54337   4
  -7  -8   5 74.9940 7.08537   2
  -7  -8   5 74.6639 6.24834   5
   7  -8  -5 82.4204 6.14380   2
  -7   8   5 75.4459 6.70555   3
   6  -8  -5 11.2916 1.52374   2
  -6  -8   5 10.1692 1.82884   4
  -6  -8   5 8.84858 1.53967   5
  -6  -8   5 7.37296 2.38682   2
  -6   8   5 7.80744 1.95523   3
   5  -8  -5 148.189 10.5896   2
  -5  -8   5 149.951 10.9292   4
  -5  -8   5 134.724 11.2997   2
  -5  -8   5 143.665 10.6787   5
  -5   8   5 147.216 11.2644   3
   4  -8  -5 2.24285 0.65412   2
  -4  -8   5 2.15321 0.66353   5
  -4  -8   5 2.15414 1.18127   4
  -4  -8   5 1.35541 1.16425   2
  -4  -8   5 1.68370 0.79229   3
  -4   8   5 2.51413 1.31327   3
  -3  -8   5 102.174 7.69189   4
   3  -8  -5 96.0557 7.25694   2
  -3  -8   5 93.0040 7.77139   2
   3  -8  -5 99.3338 7.82219   4
  -3   8   5 110.950 8.08615   3
   2  -8  -5 6.09834 0.88243   2
  -2  -8   5 8.86757 1.44246   2
   2  -8  -5 8.03786 1.54022   4
  -2  -8   5 8.38172 1.36488   4
  -2   8   5 5.40006 1.47690   3
  -1  -8   5 76.8349 5.97260   4
  -1  -8   5 85.3269 5.88097   2
   1  -8  -5 80.0689 6.23083   4
  -1   8   5 73.8690 6.13280   3
  -1   8   5 66.5471 5.59710   2
   0  -8   5 28.6349 2.42465   2
   0  -8   5 28.2073 2.63569   4
   0  -8  -5 32.0946 3.00872   4
   0   8   5 27.0959 2.26153   2
   0   8  -5 24.1235 2.16979   5
   0   8   5 28.0091 2.78283   3
   1  -8   5 28.6383 2.33705   2
  -1  -8  -5 24.4286 2.83256   4
   1  -8   5 26.0686 2.56530   4
  -1  -8  -5 22.8576 2.44109   2
   1   8   5 22.3836 2.53116   3
  -1   8  -5 28.2621 2.04746   5
  -2  -8  -5 60.7593 5.10050   4
  -2  -8  -5 57.9089 4.77820   2
   2  -8   5 62.5616 4.75201   4
   2  -8   5 63.1545 4.61320   2
  -2  -8  -5 47.7920 4.73471   3
   2   8   5 58.5523 4.69906   3
  -3  -8  -5 5.09078 1.38415   4
  -3  -8  -5 2.64463 1.16964   2
   3  -8   5 4.39418 0.97063   2
   3  -8   5 3.53076 1.08179   4
   3   8   5 3.46405 0.93497   3
   4  -8   5 0.92438 0.97135   4
  -4  -8  -5 1.95628 1.34626   2
  -4  -8  -5 1.29757 1.23288   4
   4  -8   5 1.87102 0.86293   2
  -5  -8  -5 26.5951 3.30344   4
   5  -8   5 30.1150 2.78493   2
  -5  -8  -5 22.3767 3.22815   2
   6  -8   5 27.6073 2.71368   2
  -6  -8  -5 21.9431 3.41435   4
   7  -8   5 31.2059 3.33147   2
  -7  -8  -5 33.7129 4.18103   4
  -7  -8  -5 37.3237 3.40099   5
  -8  -8  -5 20.6293 2.46975   5
  -8  -8  -5 16.0620 3.31922   4
   8  -8   5 19.1012 2.50726   2
   9  -8   5 6.98676 1.59645   2
  -9  -8  -5 5.01667 2.67495   4
  -9  -8  -5 6.07717 1.59382   5
 -10  -8  -5 38.7154 3.80857   5
  10  -8   5 31.2109 3.82704   2
 -10  -8  -5 29.6009 4.87959   4
 -11  -8  -5 5.93157 3.46501   4
 -11  -8  -5 5.87515 1.89413   5
 -12  -8  -5 7.26174 4.28624   4
  12  -8   5 15.3040 2.92803   2
 -12  -8  -5 11.1163 2.21031   5
 -12  -9   5 12.5827 2.45007   5
 -11  -9   5 100.932 8.18241   5
 -11  -9   5 96.9642 8.62910   4
  11  -9  -5 107.883 8.05448   2
 -11   9   5 78.9177 8.98206   3
  10  -9  -5 3.46838 1.55301   2
 -10  -9   5 3.51905 1.44990   5
 -10  -9   5 1.31549 1.85685   4
 -10   9   5 4.18386 2.31355   3
  -9  -9   5 1.38216 1.17559   5
   9  -9  -5 -0.6388 1.12533   2
  -9  -9   5 -1.2647 2.17258   2
  -9  -9   5 1.49140 1.84811   4
  -9   9   5 1.87986 1.92281   3
  -8  -9   5 2.90680 1.08916   5
  -8  -9   5 3.79892 1.70087   4
   8  -9  -5 3.53584 1.18895   2
  -8  -9   5 0.74587 2.21458   2
  -8   9   5 2.20785 1.72833   3
  -7  -9   5 32.7737 4.27897   2
  -7  -9   5 34.1542 3.22154   5
   7  -9  -5 35.1721 3.12549   2
  -7  -9   5 32.8140 3.55233   4
  -7   9   5 32.4099 3.75320   3
  -6  -9   5 46.4071 3.96333   5
   6  -9  -5 50.0112 3.91364   2
  -6  -9   5 47.2443 4.33533   4
  -6  -9   5 41.9738 4.95756   2
  -6   9   5 45.3815 4.59380   3
   5  -9  -5 10.5942 1.46243   2
  -5  -9   5 9.19578 2.39972   2
  -5  -9   5 15.7408 2.13425   4
  -5  -9   5 13.4957 1.55823   5
  -5   9   5 13.7628 2.47172   3
  -4  -9   5 223.035 16.2181   4
  -4  -9   5 201.485 16.4317   2
  -4  -9   5 249.680 15.9097   5
   4  -9  -5 213.903 15.7938   2
  -4  -9   5 211.657 16.0274   3
  -4   9   5 224.340 16.5217   3
  -3  -9   5 122.341 9.11516   4
   3  -9  -5 116.717 8.64622   2
  -3  -9   5 109.882 9.19226   2
   3  -9  -5 114.827 9.20894   4
  -3   9   5 134.282 9.46056   3
   2  -9  -5 314.203 22.5550   4
   2  -9  -5 324.446 21.9413   2
  -2  -9   5 320.844 22.3742   2
  -2  -9   5 321.423 22.3574   4
  -2   9   5 268.275 22.4501   3
   1  -9  -5 16.6012 2.48484   4
   1  -9  -5 19.5556 1.80449   2
  -1  -9   5 17.7383 2.03144   2
  -1  -9   5 18.5258 2.18375   4
  -1   9   5 19.4562 2.33355   3
   0  -9   5 291.741 20.8656   4
   0  -9  -5 298.828 20.6780   2
   0  -9   5 291.525 20.7270   2
   0  -9  -5 278.499 21.1078   4
   0   9   5 292.758 20.9903   3
   0   9  -5 283.886 20.8121   5
   1  -9   5 92.1854 6.53607   2
  -1  -9  -5 76.5951 6.62156   2
   1  -9   5 86.9423 6.68251   4
  -1  -9  -5 80.5077 6.96072   4
  -1   9  -5 93.1133 6.27524   5
   1   9   5 82.2600 6.67455   3
  -2  -9  -5 35.1706 3.57439   4
   2  -9   5 33.8298 2.94004   2
   2  -9   5 35.9147 3.16381   4
  -2  -9  -5 33.3135 3.26994   2
  -2  -9  -5 27.5587 3.30591   3
   2   9   5 35.2586 3.15273   3
   3  -9   5 93.0807 6.79779   4
   3  -9   5 89.4447 6.72514   2
  -3  -9  -5 88.7683 7.10231   2
  -3  -9  -5 89.8781 7.31601   4
   3   9   5 79.5596 6.53324   3
   4  -9   5 117.310 8.61081   4
  -4  -9  -5 120.240 9.30265   4
  -4  -9  -5 106.026 9.00100   2
   4  -9   5 115.764 8.72165   2
  -5  -9  -5 150.279 11.4220   4
  -5  -9  -5 125.323 10.7240   2
   5  -9   5 138.980 10.3934   2
  -6  -9  -5 11.8881 2.54373   4
   6  -9   5 7.61770 1.58585   2
   7  -9   5 22.8989 2.81095   2
  -7  -9  -5 26.9590 3.86152   4
   8  -9   5 37.1462 3.85402   2
  -8  -9  -5 38.1664 4.98434   4
  -9  -9  -5 45.4283 6.00342   4
   9  -9   5 46.6929 4.65678   2
  -9  -9  -5 52.2588 4.66594   5
  10  -9   5 14.8348 2.77400   2
 -10  -9  -5 19.8725 2.91416   5
 -10  -9  -5 23.4740 4.30317   4
  11  -9   5 29.3303 3.72135   2
 -11  -9  -5 26.4857 3.53547   5
 -11  -9  -5 28.6290 5.22231   4
 -11 -10   5 18.4937 3.42387   4
 -11 -10   5 17.3557 2.85421   5
  11 -10  -5 23.5851 3.04726   2
 -11  10   5 11.1919 3.63831   3
  10 -10  -5 56.9513 4.90382   2
 -10 -10   5 57.9969 5.01918   5
 -10 -10   5 53.0094 5.66308   4
 -10 -10   5 34.2325 6.90182   2
 -10  10   5 44.6281 7.97210   3
  -9 -10   5 38.3409 4.20868   4
  -9 -10   5 32.7403 3.49757   5
   9 -10  -5 36.4914 3.52551   2
  -9  10   5 30.8622 4.31785   3
  -8 -10   5 146.103 11.2593   4
   8 -10  -5 144.186 10.7243   2
  -8 -10   5 149.253 10.8440   5
  -8  10   5 127.729 11.4437   3
  -7 -10   5 9.28126 1.58059   5
   7 -10  -5 10.3136 1.78949   2
  -7 -10   5 7.86576 2.68438   2
  -7 -10   5 7.60392 1.98038   4
  -7  10   5 5.97755 1.76792   3
   6 -10  -5 118.832 9.25444   2
  -6 -10   5 118.816 9.68534   4
  -6 -10   5 126.124 10.3302   2
  -6 -10   5 139.792 9.39912   5
  -6  10   5 119.580 10.0769   3
  -5 -10   5 47.8358 5.07723   2
   5 -10  -5 54.3889 4.19303   2
  -5 -10   5 54.2765 4.73154   4
  -5  10   5 51.5975 5.03679   3
   4 -10  -5 30.8158 2.53458   2
  -4 -10   5 27.8819 4.07194   4
   4 -10  -5 31.6092 3.46026   4
  -4 -10   5 25.2256 3.37354   2
  -3 -10   5 215.275 15.9794   4
   3 -10  -5 210.922 16.1519   4
   3 -10  -5 215.415 15.5240   2
  -3  10   5 229.388 16.3087   3
   2 -10  -5 192.239 14.6262   4
  -2 -10   5 196.625 14.4368   4
  -2 -10   5 196.333 14.4596   2
   2 -10  -5 194.321 13.9929   2
  -2  10   5 198.628 14.6583   3
   1 -10  -5 16.8257 2.50854   4
   1 -10  -5 15.3398 1.73774   2
  -1 -10   5 14.5101 1.99098   2
  -1 -10   5 16.1410 2.15390   4
  -1  10   5 18.9747 2.34657   3
   0 -10   5 82.5647 6.45629   4
   0 -10   5 82.1200 6.25060   2
   0 -10  -5 83.0312 6.22874   2
   0 -10  -5 85.6045 6.79924   4
   0  10   5 85.8149 6.55031   3
   0  10  -5 69.1087 5.97496   5
  -1 -10  -5 188.366 14.6813   2
   1 -10   5 203.716 14.6000   2
  -1 -10  -5 207.336 15.1366   4
   1 -10   5 204.215 14.7508   4
   1  10   5 210.087 14.7696   3
  -1  10  -5 193.654 14.3225   5
   2 -10   5 84.3054 6.62599   4
   2 -10   5 88.7196 6.52934   2
  -2 -10  -5 78.2119 6.75938   2
  -2 -10  -5 88.8273 7.17918   4
   2  10   5 81.5880 6.48619   3
  -3 -10  -5 29.3187 3.57461   4
   3 -10   5 28.4101 2.82615   4
   3 -10   5 25.4831 2.92691   2
  -3 -10  -5 32.5482 3.43956   2
   4 -10   5 38.2822 3.41359   4
  -4 -10  -5 30.9288 4.04218   2
   4 -10   5 39.9232 3.38727   2
  -4 -10  -5 32.8399 4.61460   4
   5 -10   5 20.4245 2.38749   2
  -5 -10  -5 19.4575 3.35990   2
  -5 -10  -5 24.0078 3.47476   4
   6 -10   5 8.13384 1.66053   2
  -6 -10  -5 6.59534 2.44765   4
   7 -10   5 8.26258 1.75638   2
  -7 -10  -5 6.21302 2.60284   4
  -8 -10  -5 61.4209 7.02086   4
   8 -10   5 74.2666 6.06360   2
   9 -10   5 21.0648 3.00672   2
  -9 -10  -5 17.4210 4.09275   4
 -10 -10  -5 65.4869 8.17323   4
  11 -10   5 7.12334 2.24207   2
 -11 -10  -5 8.32493 5.06772   4
 -10 -11   5 4.35447 1.54696   5
 -10 -11   5 3.60594 2.31286   4
  10 -11  -5 3.91443 1.70538   2
 -10 -11   5 4.10987 2.88348   2
 -10  11   5 1.85745 2.74445   3
  -9 -11   5 27.7251 3.95700   4
  -9 -11   5 18.6523 3.96715   2
   9 -11  -5 30.7672 3.04592   2
  -9 -11   5 27.8141 3.04583   5
  -9  11   5 16.3001 3.77187   3
  -8 -11   5 13.7152 2.61859   4
  -8 -11   5 10.9975 1.73235   5
  -8 -11   5 4.25659 2.66735   2
   8 -11  -5 9.03015 2.42138   2
  -8  11   5 4.64180 2.21499   3
  -7 -11   5 49.4149 5.26985   4
  -7 -11   5 61.0642 5.87632   2
  -7 -11   5 58.4806 4.79776   5
   7 -11  -5 56.1902 4.74812   2
  -7  11   5 62.3446 5.97314   3
   6 -11  -5 10.7679 1.62608   2
  -6 -11   5 12.4743 2.22575   4
  -6 -11   5 9.35460 2.46025   2
  -6  11   5 6.29558 2.09727   3
  -5 -11   5 6.53947 2.26392   2
   5 -11  -5 7.11394 1.18749   2
  -5 -11   5 6.63649 1.78932   4
  -5  11   5 6.54025 1.77961   3
  -4 -11   5 57.8913 4.96556   4
  -4 -11   5 50.2450 5.20346   2
  -4 -11   5 51.7429 4.68290   3
   4 -11  -5 55.8592 4.38227   2
   4 -11  -5 59.2547 5.37919   4
  -4  11   5 64.2055 5.39970   3
  -3 -11   5 22.9719 2.69980   4
   3 -11  -5 22.6253 3.14185   4
  -3 -11   5 22.7461 2.93081   2
   3 -11  -5 23.7610 2.10926   2
  -3  11   5 14.9564 2.97000   3
   2 -11  -5 7.75383 1.16779   2
  -2 -11   5 6.11194 1.65604   2
   2 -11  -5 8.56370 1.99698   4
  -2  11   5 9.32116 1.93964   3
   1 -11  -5 89.9859 7.35418   4
   1 -11  -5 88.1171 6.59555   2
  -1 -11   5 84.3706 6.98318   4
  -1 -11   5 84.1209 6.86699   2
  -1  11   5 88.1078 7.15446   3
   0 -11   5 38.0546 3.45746   2
   0 -11   5 35.1661 3.48119   4
   0 -11  -5 41.1115 4.12323   4
   0 -11  -5 30.7706 3.26820   2
   0  11   5 33.3996 3.46891   3
   0  11  -5 34.6665 3.22550   5
   1 -11   5 17.6538 2.38008   4
  -1 -11  -5 16.1749 2.39551   2
   1 -11   5 17.0433 2.08821   2
  -1 -11  -5 18.6353 2.87254   4
   1  11   5 14.6385 2.19676   3
  -1  11  -5 17.8334 1.75259   5
   2 -11   5 17.5733 2.13544   2
  -2 -11  -5 29.3730 4.74671   4
  -2 -11  -5 19.2131 2.65543   2
   2 -11   5 19.1925 2.38020   4
   2  11   5 15.6144 2.18099   3
  -3 -11  -5 17.0133 3.08183   4
  -3 -11  -5 15.0668 2.93075   2
   3 -11   5 20.4180 2.43016   4
   3 -11   5 21.6533 2.24592   2
   4 -11   5 89.2722 6.88170   2
   4 -11   5 91.0248 6.85190   4
  -4 -11  -5 80.1610 7.43721   2
  -4 -11  -5 84.5367 7.68353   4
  -5 -11  -5 27.8409 3.87670   4
   5 -11   5 24.8264 2.65493   2
  -5 -11  -5 19.8434 3.70769   2
  -6 -11  -5 1.67395 2.28369   4
   6 -11   5 1.31275 1.16185   2
  -6 -11  -5 0.35254 2.09652   2
  -7 -11  -5 4.69431 2.82788   4
   7 -11   5 2.76694 1.34802   2
  -8 -11  -5 23.5967 4.14944   4
   8 -11   5 16.7013 2.76677   2
  -9 -11  -5 5.08097 3.51640   4
   9 -11   5 2.31465 1.71025   2
  10 -11   5 5.39244 2.09445   2
 -10 -11  -5 3.98504 5.39966   4
 -10 -12   5 1.33372 3.01424   2
 -10 -12   5 -0.7508 2.48933   4
  10 -12  -5 3.76004 1.84552   2
 -10 -12   5 4.36494 1.54209   5
 -10  12   5 -1.1693 2.76446   3
  -9 -12   5 2.44309 1.28468   5
  -9 -12   5 1.93195 2.63686   2
   9 -12  -5 2.30005 1.50260   2
  -9 -12   5 3.58940 2.60506   4
  -9  12   5 1.12596 2.61751   3
  -8 -12   5 27.1100 3.63724   4
   8 -12  -5 22.4704 2.68328   2
  -8 -12   5 19.2238 3.71835   2
  -8  12   5 15.3444 3.55293   3
   7 -12  -5 20.7808 2.35938   2
  -7 -12   5 23.0510 3.26889   4
  -7 -12   5 15.8970 3.65798   2
  -7  12   5 17.5981 3.37239   3
  -6 -12   5 22.9427 2.87237   4
  -6 -12   5 12.0038 3.28652   2
   6 -12  -5 18.5581 2.14061   2
  -6  12   5 17.1484 3.22497   3
   5 -12  -5 2.22177 0.93655   2
  -5 -12   5 2.58462 1.50695   4
  -5 -12   5 3.29276 2.10280   2
  -5  12   5 2.39609 1.99496   3
   4 -12  -5 41.1230 3.34816   2
  -4 -12   5 38.3723 4.30577   2
  -4 -12   5 34.7426 3.95991   4
   4 -12  -5 40.1150 4.55882   4
  -4  12   5 45.3260 4.52630   3
   3 -12  -5 12.4707 1.50084   2
  -3 -12   5 7.04534 1.93396   4
  -3 -12   5 7.07045 1.95278   2
   3 -12  -5 8.81018 2.23977   4
  -3  12   5 8.48458 2.34980   3
  -2 -12   5 2.71597 1.36695   4
  -2 -12   5 2.05451 1.59727   2
   2 -12  -5 2.03984 1.84138   4
   2 -12  -5 1.74163 0.90164   2
  -2  12   5 0.93788 1.66109   3
   1 -12  -5 27.8436 2.59817   2
  -1 -12   5 23.7050 2.92582   2
   1 -12  -5 30.3426 3.66214   4
  -1 -12   5 23.3513 2.95059   4
  -1  12   5 24.4321 3.14147   3
   0 -12  -5 35.4683 3.46269   2
   0 -12   5 35.1624 3.43329   2
   0 -12  -5 40.5281 5.09016   4
   0  12   5 35.7766 3.69647   3
  -1 -12  -5 14.1626 2.65356   4
   1 -12   5 12.7109 2.08474   4
  -1 -12  -5 11.4294 2.21415   2
   1 -12   5 10.7679 1.81790   2
   1  12   5 11.5077 2.20442   3
  -2 -12  -5 10.9515 2.39734   2
  -2 -12  -5 13.2184 2.63787   4
   2 -12   5 13.9741 2.21916   4
   2 -12   5 12.4757 1.87924   2
   2  12   5 10.2991 2.18094   3
   3 -12   5 52.6177 4.57381   4
   3 -12   5 53.5394 4.47185   2
  -3 -12  -5 50.4084 5.72899   4
  -3 -12  -5 48.9670 5.54000   2
   4 -12   5 38.1260 3.65545   4
  -4 -12  -5 36.5426 4.55334   2
   4 -12   5 38.6028 3.56618   2
  -4 -12  -5 37.9405 4.85966   4
  -5 -12  -5 28.7216 4.12245   2
  -5 -12  -5 26.7642 4.30370   4
   5 -12   5 27.1713 2.89281   2
  -6 -12  -5 2.38645 2.65916   2
   6 -12   5 4.63363 1.47827   2
  -6 -12  -5 2.39848 2.86335   4
  -7 -12  -5 65.2817 7.48094   4
   7 -12   5 66.8279 5.77605   2
   8 -12   5 24.5934 3.19746   2
  -8 -12  -5 23.8604 4.72849   4
   9 -12   5 7.92502 2.20887   2
 -10 -12  -5 5.40716 5.09265   4
  10 -12   5 1.81679 1.75759   2
   9 -13  -5 17.8623 2.49539   2
  -9 -13   5 11.9257 3.67180   2
  -9 -13   5 9.48031 3.15526   4
  -9  13   5 4.47837 3.37758   3
  -8 -13   5 4.76957 2.98851   2
   8 -13  -5 12.4690 1.98977   2
  -8  13   5 10.5152 3.34093   3
  -7 -13   5 17.6536 3.91590   2
  -7  13   5 26.7534 4.25804   3
   6 -13  -5 4.27771 1.31352   2
  -6 -13   5 5.41666 1.96307   4
  -6 -13   5 6.09260 2.57683   2
  -6  13   5 2.07026 2.34522   3
   5 -13  -5 4.50681 1.10591   2
  -5 -13   5 2.01377 2.10229   2
  -5 -13   5 4.58472 1.79037   4
  -5  13   5 1.53861 2.10482   3
  -4 -13   5 14.1102 3.04509   2
  -4 -13   5 21.5580 2.98676   4
   4 -13  -5 23.0659 2.30165   2
   4 -13  -5 21.4767 3.51899   4
  -4  13   5 19.1759 3.34136   3
   3 -13  -5 23.1830 3.60749   4
   3 -13  -5 21.7149 2.25207   2
  -3 -13   5 21.1202 3.23309   2
  -3 -13   5 20.0917 2.92208   4
  -3  13   5 19.5795 3.31135   3
  -2 -13   5 38.6740 3.91766   4
  -2 -13   5 31.9648 3.85235   2
   2 -13  -5 36.7242 3.28440   2
   2 -13  -5 39.0431 4.85488   4
  -2  13   5 36.5934 4.23117   3
   1 -13  -5 36.8903 4.28871   4
  -1 -13   5 35.0626 3.56890   4
   1 -13  -5 29.5306 3.13500   2
  -1 -13   5 33.2803 3.46026   2
  -1  13   5 24.0158 3.58781   3
   0 -13  -5 93.5994 7.38566   2
   0 -13   5 98.6609 7.40158   2
   0 -13   5 97.9396 7.56485   4
   0 -13  -5 100.108 8.35693   4
   0  13   5 73.2860 7.63514   3
   1 -13   5 7.68033 1.77887   4
   1 -13   5 4.08236 1.46367   2
  -1 -13  -5 5.66727 2.37869   4
  -1 -13  -5 2.16860 1.87649   2
   1  13   5 2.65968 1.80573   3
  -2 -13  -5 45.0274 5.26703   4
  -2 -13  -5 50.7645 4.82709   2
   2 -13   5 45.9345 4.16606   2
   3 -13   5 0.98500 1.44449   4
   3 -13   5 1.17727 1.11677   2
  -3 -13  -5 -1.1911 2.11662   4
  -4 -13  -5 93.6879 8.27717   2
   4 -13   5 91.5978 7.39429   4
  -4 -13  -5 84.3290 8.60466   4
   4 -13   5 97.3439 7.36165   2
   5 -13   5 4.36436 1.37170   2
  -5 -13  -5 3.93715 2.67022   2
  -5 -13  -5 5.19104 2.83296   4
  -6 -13  -5 17.6619 3.70495   2
  -6 -13  -5 25.5067 4.34632   4
   6 -13   5 12.1981 2.30092   2
   7 -13   5 23.4067 2.99722   2
  -7 -13  -5 21.0831 4.59457   4
   8 -13   5 38.4847 4.07951   2
  -8 -13  -5 35.8236 8.00921   4
  -9 -13  -5 9.21627 4.45467   4
  -8 -14   5 10.5384 3.73771   2
   8 -14  -5 19.6704 2.56464   2
  -8 -14   5 14.3991 3.36734   4
  -8  14   5 11.7622 3.79806   3
   7 -14  -5 3.43625 1.52756   2
  -7 -14   5 10.2261 3.20414   2
  -7 -14   5 5.35899 2.28726   4
  -7  14   5 6.79128 3.03919   3
   6 -14  -5 19.8641 2.40521   2
  -6 -14   5 13.9670 3.72198   2
  -6  14   5 19.3338 3.71800   3
  -5 -14   5 4.06587 2.29393   2
  -5 -14   5 8.83937 2.30786   4
   5 -14  -5 11.6941 1.72989   2
  -5  14   5 9.42227 3.17825   3
   4 -14  -5 12.7793 3.35137   4
  -4 -14   5 14.3257 2.66854   4
  -4 -14   5 16.0642 3.00857   2
   4 -14  -5 17.8607 2.10394   2
  -4  14   5 14.8624 3.32070   3
   3 -14  -5 14.6143 3.25466   4
   3 -14  -5 13.4208 1.91786   2
  -3 -14   5 9.30785 2.49213   2
  -3 -14   5 15.5401 2.64982   4
  -3  14   5 10.8050 3.10288   3
  -2 -14   5 6.59822 2.05230   4
   2 -14  -5 6.79967 2.69372   2
   2 -14  -5 6.50310 2.72310   4
  -2 -14   5 5.90713 2.15779   2
  -2  14   5 3.19200 2.40690   3
  -1 -14   5 81.5657 6.86500   2
   1 -14  -5 84.3937 7.66294   4
   1 -14  -5 79.8083 6.58153   2
  -1 -14   5 81.0735 6.99128   4
   0 -14   5 20.7421 3.03021   4
   0 -14  -5 15.0737 2.44994   2
   0 -14  -5 18.5297 3.51949   4
   0 -14   5 17.2642 2.53340   2
   0  14   5 11.6078 3.04428   3
   1 -14   5 60.9139 5.18296   2
  -1 -14  -5 60.1069 6.49992   4
   1 -14   5 57.0260 5.45818   4
   2 -14   5 1.39107 1.52796   4
  -2 -14  -5 3.57439 2.22760   2
  -2 -14  -5 3.73031 2.78667   4
   2 -14   5 2.75213 1.37154   2
   3 -14   5 49.1452 4.28078   2
  -3 -14  -5 50.0307 5.77708   4
  -3 -14  -5 44.0089 5.17202   2
   3 -14   5 41.2811 4.50374   4
  -4 -14  -5 5.04818 4.73804   2
  -4 -14  -5 7.53226 3.20214   4
   4 -14   5 5.34636 1.64507   2
   5 -14   5 57.4864 5.08308   2
  -5 -14  -5 59.8715 6.44529   2
  -6 -14  -5 19.7247 4.67585   4
   6 -14   5 14.6512 2.33524   2
  -6 -14  -5 10.1173 3.83305   2
   7 -14   5 40.0549 3.97953   2
  -7 -14  -5 28.4315 5.42070   2
  -7 -14  -5 40.4448 6.04254   4
   8 -14   5 19.0142 3.10191   2
  -8 -14  -5 16.6784 5.72827   4
  -7 -15   5 7.20170 3.38406   2
  -7 -15   5 6.25051 2.96794   4
   7 -15  -5 9.42019 1.80689   2
  -7  15   5 7.53676 3.61339   3
  -6 -15   5 1.39529 2.09714   4
   6 -15  -5 2.47454 1.38161   2
  -6 -15   5 0.83969 2.85325   2
  -6  15   5 -0.8516 2.99479   3
   5 -15  -5 11.5730 1.81500   2
  -5  15   5 6.35349 3.31558   3
  -4 -15   5 30.4128 4.18435   4
  -4 -15   5 23.2994 4.15722   2
   4 -15  -5 30.8524 2.95719   2
   4 -15  -5 23.5855 4.41728   4
  -4  15   5 20.5247 4.35661   3
   3 -15  -5 39.3017 3.61353   2
  -3 -15   5 40.7927 4.41913   4
  -3 -15   5 32.3302 4.51943   2
   3 -15  -5 42.0228 5.57571   4
  -3  15   5 31.6108 5.02200   3
   2 -15  -5 3.89904 2.94330   4
  -2 -15   5 4.55566 2.24564   2
  -2 -15   5 4.93305 2.07372   4
   2 -15  -5 5.27862 1.68230   2
  -2  15   5 6.62904 2.81253   3
   1 -15  -5 9.22141 3.32919   4
   1 -15  -5 12.3216 2.32644   2
  -1 -15   5 16.0562 2.68654   4
  -1 -15   5 14.5805 2.81223   2
  -1  15   5 7.49133 3.17449   3
   0 -15   5 24.5994 3.51518   4
   0 -15  -5 26.3386 4.16106   4
   0 -15   5 24.1419 3.18441   2
   0 -15  -5 19.9216 3.28972   2
   1 -15   5 23.1752 3.38379   4
  -1 -15  -5 16.9919 3.25544   2
  -1 -15  -5 17.1974 3.92397   4
   1 -15   5 21.5345 2.80402   2
  -2 -15  -5 24.5572 4.57954   4
   2 -15   5 29.2302 3.69591   4
   2 -15   5 26.7684 3.12203   2
  -2 -15  -5 23.1824 3.97903   2
  -3 -15  -5 26.5460 4.58895   2
   3 -15   5 36.4746 3.58379   2
   3 -15   5 35.9045 4.21647   4
  -3 -15  -5 35.4465 5.44432   4
   4 -15   5 7.36464 1.94634   2
  -4 -15  -5 10.4629 3.55568   2
  -4 -15  -5 12.3239 3.84358   4
   4 -15   5 10.4284 2.21970   4
   5 -15   5 -1.3051 2.05346   4
   5 -15   5 1.78802 1.98218   2
  -5 -15  -5 3.54511 3.50016   2
  -6 -15  -5 10.4286 4.22319   2
   6 -15   5 8.25903 1.99397   2
  -6 -15  -5 20.4714 4.88438   4
  -7 -15  -5 50.0714 7.22410   4
  -7 -15  -5 40.5759 6.40627   2
   7 -15   5 47.4506 4.62486   2
  -6 -16   5 3.84206 2.50309   4
  -6 -16   5 2.43066 3.13500   2
   5 -16  -5 12.3085 2.19011   2
  -5 -16   5 8.81627 3.40562   2
  -5 -16   5 13.9514 3.25529   4
  -5  16   5 16.0576 4.46677   3
  -4 -16   5 -1.6063 2.24834   2
   4 -16  -5 -5.8165 3.50253   4
  -4 -16   5 2.29088 2.37678   4
   4 -16  -5 3.30918 1.57142   2
  -4  16   5 0.62052 3.48662   3
  -3 -16   5 7.21603 3.35925   2
   3 -16  -5 6.93933 3.59408   4
   3 -16  -5 5.93396 1.78661   2
  -3  16   5 2.46684 3.32544   3
   2 -16  -5 34.1228 5.44998   4
   2 -16  -5 37.0674 4.07632   2
  -2 -16   5 43.9213 4.88435   4
  -2 -16   5 36.2380 5.18137   2
   1 -16  -5 14.8972 4.18407   4
   1 -16  -5 24.7925 3.45017   2
  -1 -16   5 28.8184 4.00091   4
  -1 -16   5 19.6166 3.30501   2
   0 -16   5 29.5930 4.04941   4
   0 -16  -5 21.8572 3.86415   2
   0 -16   5 24.6411 3.47463   2
   0 -16  -5 27.7013 4.77388   4
  -1 -16  -5 15.0903 3.67131   2
   1 -16   5 23.4813 3.73838   4
   1 -16   5 15.7496 2.54420   2
  -1 -16  -5 7.24427 3.92604   4
   2 -16   5 51.7360 5.63375   4
  -2 -16  -5 59.0960 7.24982   4
   2 -16   5 61.2845 5.38912   2
  -2 -16  -5 46.1808 6.13973   2
   3 -16   5 11.3665 2.94695   2
   3 -16   5 3.89558 2.66018   4
  -3 -16  -5 8.79088 3.46834   2
  -4 -16  -5 14.2670 4.31424   2
   4 -16   5 19.2337 2.65154   2
   4 -16   5 19.1737 3.22437   4
  -4 -16  -5 19.8153 4.91524   4
  -5 -16  -5 18.3878 4.57726   2
  -5 -16  -5 20.5940 5.42669   4
   5 -16   5 16.2834 2.61274   2
   4 -17  -5 28.1095 5.57313   4
  -3 -17   5 17.3246 3.60735   4
  -3 -17   5 12.8563 3.29109   2
   3 -17  -5 9.13720 2.51636   2
   3 -17  -5 8.48036 4.21499   4
  -2 -17   5 2.49308 2.45991   2
   2 -17  -5 4.96891 2.28068   2
  -2 -17   5 8.74102 2.65694   4
   2 -17  -5 13.6126 3.90733   4
  -1 -17   5 24.3717 3.83513   2
   1 -17  -5 18.8643 3.41091   2
   1 -17  -5 19.1607 4.71554   4
  -1 -17   5 25.1004 4.71656   4
   0 -17   5 19.8364 3.18719   2
   0 -17  -5 20.9396 3.64116   2
  -1 -17  -5 30.3173 4.40089   2
   1 -17   5 18.5451 3.77923   4
   1 -17   5 22.0203 3.18989   2
   2 -17   5 13.6521 3.57986   4
  -2 -17  -5 13.3414 3.60562   2
  -2 -17  -5 16.2464 5.39437   4
   2 -17   5 9.73362 2.36576   2
   3 -17   5 1.85845 2.79698   4
  -3 -17  -5 5.75992 4.80792   4
  -3 -17  -5 7.93966 3.73644   2
   3 -17   5 1.69062 1.81304   2
 -13   0   6 29.3273 4.21522   3
 -12   0   6 30.6673 3.86741   3
 -11   0   6 23.8634 3.21107   3
 -10   0   6 75.0689 6.46033   3
  -9   0   6 244.706 18.1224   3
  -8   0   6 44.6531 4.28273   3
  -7   0   6 59.4808 5.15536   3
  -6   0   6 436.764 31.4580   3
  -5   0   6 450.098 32.3535   3
   4   0  -6 22.9251 2.28661   2
  -4   0   6 29.1906 2.79280   3
  -3   0   6 101.289 7.91824   3
   3   0  -6 84.6083 6.70270   2
  -3   0   6 85.8542 6.69140   2
   3   0  -6 92.4740 7.03517   3
   2   0  -6 468.960 32.1038   3
  -2   0   6 479.008 32.1376   3
   2   0  -6 449.273 31.5832   2
  -2   0   6 404.327 31.6567   2
   1   0  -6 151.108 10.1755   2
  -1   0   6 138.988 10.2223   2
   1   0  -6 153.464 10.7328   3
  -1   0   6 143.546 10.6860   3
  -1   0   6 133.027 10.6404   4
   0   0   6 2546.00 179.883   4
   0   0  -6 2440.93 179.364   2
   0   0   6 2719.26 179.880   3
   1   0   6 823.763 57.9728   3
   1   0   6 787.261 58.0120   4
  -1   0  -6 865.526 58.1385   4
   1   0   6 771.449 57.5329   2
   1   0   6 863.864 57.5845   5
  -2   0  -6 242.096 17.7633   4
   2   0   6 223.073 17.6199   4
  -2   0  -6 264.168 17.2625   5
   3   0   6 1252.19 91.1339   4
  -3   0  -6 1288.69 90.8492   5
  -3   0  -6 1351.04 91.3511   4
   4   0   6 48.5718 4.04467   4
  -4   0  -6 45.4538 3.95283   5
  -4   0  -6 53.2216 4.30728   4
  -5   0  -6 256.199 17.5350   4
  -5   0  -6 219.894 17.0680   5
  -6   0  -6 9.34583 1.89311   4
  -6   0  -6 8.56083 1.41423   5
  -7   0  -6 54.0414 4.96200   4
 -11   0  -6 11.4045 2.24744   5
 -12   0  -6 32.5829 3.91452   5
 -13   0  -6 0.73871 2.92572   5
 -13  -1   6 15.9516 3.04819   3
 -13   1   6 19.0543 3.66110   3
 -12  -1   6 13.2860 2.67171   3
 -12   1   6 13.3445 2.93159   3
 -11  -1   6 9.27171 2.18067   3
 -11   1   6 8.49759 2.22410   3
 -10  -1   6 45.7352 4.18089   3
 -10   1   6 37.3205 4.50936   3
  -9  -1   6 281.387 20.4920   3
  -9   1   6 277.469 20.6173   3
  -8  -1   6 395.635 28.7312   3
  -8   1   6 401.217 28.8683   3
  -7  -1   6 217.477 16.0230   3
  -7   1   6 214.174 16.0679   3
  -6  -1   6 58.2483 4.93297   3
  -6   1   6 53.3432 4.89748   3
  -5  -1   6 42.1233 4.02931   2
  -5  -1   6 49.7554 4.18894   3
  -5   1   6 46.5558 4.24236   3
  -4  -1   6 138.376 9.42352   3
  -4  -1   6 113.492 9.05311   2
   4  -1  -6 112.460 8.93462   2
  -4   1   6 122.576 9.15221   4
  -3  -1   6 326.588 25.6165   2
   3  -1  -6 303.000 25.4639   2
  -3  -1   6 392.068 25.9902   3
   3   1  -6 351.302 25.5161   2
   3   1  -6 383.482 25.9603   3
  -3   1   6 356.462 25.8252   4
  -3   1   6 422.753 26.1857   3
   2  -1  -6 6.07278 1.13853   3
  -2  -1   6 6.30000 1.16268   3
   2  -1  -6 4.37821 0.68244   2
  -2  -1   6 7.86562 0.90565   2
  -2   1   6 6.70595 1.33893   3
  -2   1   6 5.50041 1.18231   4
   2   1  -6 7.23336 1.24638   3
   2   1  -6 8.84349 0.80118   2
  -1  -1   6 247.355 16.6511   2
  -1  -1   6 225.139 17.0299   3
   1  -1  -6 235.062 17.0944   3
   1   1  -6 243.661 16.6083   2
  -1   1   6 237.705 17.1374   3
  -1   1   6 222.787 17.0605   4
   0  -1   6 3170.80 229.876   3
   0  -1  -6 3469.99 229.944   3
   0  -1  -6 3302.02 230.005   4
   0   1   6 3192.91 229.896   3
   0   1   6 3290.95 229.956   4
   1  -1   6 209.552 15.4865   5
  -1  -1  -6 227.217 16.0923   4
   1  -1   6 201.611 15.9166   4
   1  -1   6 210.255 15.5226   2
   1   1   6 217.709 15.9822   4
   1   1   6 225.323 15.9330   3
   1   1   6 247.105 15.6031   5
   2  -1   6 21.0513 1.80751   2
  -2  -1  -6 25.2868 2.36900   4
   2  -1   6 19.3473 2.16931   4
   2   1   6 18.2995 1.80145   5
  -2   1  -6 25.8334 1.76403   5
   2   1   6 21.2001 2.22769   4
   2   1   6 23.2707 2.11888   3
  -3  -1  -6 182.081 12.9958   4
  -3  -1  -6 186.035 12.5187   5
   3  -1   6 161.729 12.7672   4
   3   1   6 169.050 12.7524   4
  -3   1  -6 172.050 12.4622   5
   4  -1   6 86.1130 6.68041   4
  -4  -1  -6 99.1295 7.29255   4
  -4  -1  -6 86.3192 6.51293   5
  -4   1  -6 91.0298 6.88250   4
  -4   1  -6 76.6213 6.43637   5
   5  -1   6 94.2103 7.70689   4
  -5  -1  -6 111.457 8.15911   4
  -5  -1  -6 99.5137 7.71409   5
  -5   1  -6 107.062 8.03023   4
  -6  -1  -6 42.3657 3.89598   4
  -6  -1  -6 37.0761 3.43182   5
  -7  -1  -6 65.1090 5.39189   4
  -7  -1  -6 52.1696 4.81798   5
  -8  -1  -6 138.745 11.6458   5
  -8  -1  -6 171.411 12.0660   4
  -9  -1  -6 22.9094 2.82320   5
 -10  -1  -6 34.5874 3.65045   5
 -11  -1  -6 3.03232 1.44239   5
 -12  -1  -6 16.4060 2.87991   5
 -13  -1  -6 7.10301 2.10822   5
 -13  -2   6 17.0689 3.20777   3
 -13   2   6 17.7406 3.84552   3
 -12  -2   6 40.4084 4.41252   3
 -12   2   6 46.5349 4.90940   3
 -11  -2   6 46.8641 4.50449   3
 -11   2   6 48.4658 4.91961   3
 -10  -2   6 18.0520 2.60030   3
 -10   2   6 19.4303 2.88905   3
  -9  -2   6 3.33802 1.38485   3
  -9  -2   6 3.30608 1.26742   4
  -9   2   6 -0.5601 1.43462   3
  -8  -2   6 24.1389 2.71353   4
  -8  -2   6 26.0365 2.86603   3
  -8   2   6 26.8936 3.12820   3
  -7  -2   6 167.421 13.0333   4
  -7  -2   6 188.275 13.4671   3
  -7   2   6 183.044 13.5650   3
  -6  -2   6 50.2220 4.36175   4
  -6  -2   6 54.4291 4.73785   3
  -6  -2   6 52.1104 4.80452   2
  -6   2   6 62.0134 4.93829   3
  -5  -2   6 47.0694 4.75896   2
  -5  -2   6 61.6753 4.97491   3
  -5   2   6 65.9212 5.18274   3
   4  -2  -6 351.492 29.0887   2
  -4  -2   6 462.938 29.7813   3
  -4  -2   6 365.535 29.2580   2
   4   2  -6 428.495 29.4814   3
  -4   2   6 474.625 29.8135   3
  -4   2   6 390.139 29.4463   4
  -3  -2   6 508.767 34.2421   3
   3  -2  -6 414.843 33.7901   2
  -3  -2   6 409.906 34.0705   2
   3   2  -6 504.962 34.2396   3
  -3   2   6 550.310 34.5564   3
   3   2  -6 501.113 33.8568   2
  -3   2   6 475.517 34.1278   4
  -2  -2   6 60.2512 4.96962   3
  -2  -2   6 58.5753 4.72641   2
   2  -2  -6 61.2756 5.41073   3
  -2   2   6 59.3942 4.99944   4
  -2   2   6 72.8771 5.73501   3
   2   2  -6 66.7916 4.64125   2
  -1  -2   6 162.554 11.3088   2
   1  -2  -6 154.078 11.7312   4
   1  -2  -6 150.485 11.7081   3
  -1  -2   6 153.404 11.6578   3
  -1   2   6 156.349 11.7115   4
   1   2  -6 166.621 11.3595   2
  -1   2   6 166.112 11.8655   3
   0  -2  -6 1622.08 116.383   4
   0  -2   6 1642.84 115.883   2
   0  -2  -6 1710.02 116.348   3
   0   2   6 1738.52 116.391   3
   0   2  -6 1569.27 115.904   2
   0   2   6 1665.29 116.346   4
  -1  -2  -6 738.539 47.5322   3
   1  -2   6 643.982 47.1190   2
  -1  -2  -6 697.099 47.6542   4
   1   2   6 693.733 47.5160   3
  -1   2  -6 571.171 47.1759   2
   1   2   6 692.038 47.5547   4
  -2  -2  -6 204.661 13.9967   4
   2  -2   6 163.536 13.7265   4
   2  -2   6 186.182 13.4769   2
   2   2   6 192.006 13.7726   3
   2   2   6 183.062 13.5221   5
  -2   2  -6 194.457 13.3594   5
   2   2   6 200.595 13.9820   4
   3  -2   6 20.5228 1.89680   2
   3  -2   6 21.5168 2.21864   4
   3   2   6 26.6349 2.18815   3
  -3   2  -6 19.9280 1.81615   5
  -4  -2  -6 203.598 14.2750   5
  -4  -2  -6 204.384 14.7075   4
   4  -2   6 185.666 14.4048   4
  -5  -2  -6 53.3900 4.62145   5
  -5  -2  -6 64.4073 5.10381   4
  -6  -2  -6 33.4962 3.22178   4
  -6  -2  -6 23.5517 2.57370   5
  -7  -2  -6 42.5892 3.97022   5
  -7  -2  -6 47.5131 4.44880   4
  -8  -2  -6 59.7729 5.52426   5
  -8  -2  -6 73.7200 6.04900   4
  -9  -2  -6 149.408 12.3612   5
  -9  -2  -6 176.840 12.7667   4
 -10  -2  -6 8.99486 1.99069   5
 -11  -2  -6 42.0518 4.37698   5
 -12  -2  -6 14.8893 2.88541   5
 -13  -2  -6 -0.1837 1.37074   5
 -13   3   6 10.6529 2.91945   3
 -12  -3   6 7.65919 2.12002   3
 -12   3   6 12.4391 2.85414   3
 -11  -3   6 36.8534 3.73843   3
 -11   3   6 38.6825 4.44691   3
 -10  -3   6 34.6628 3.44233   4
 -10  -3   6 32.1076 3.26371   3
 -10   3   6 30.9606 3.73166   3
  -9  -3   6 40.8079 3.67761   4
  -9  -3   6 37.4831 3.62219   3
  -9   3   6 36.4901 4.13762   3
  -8  -3   6 16.0359 2.22624   4
  -8  -3   6 17.9077 2.28679   3
  -8   3   6 17.0880 2.47104   3
  -7  -3   6 102.899 7.59566   3
  -7  -3   6 88.3404 7.25653   4
  -7   3   6 94.6655 7.78114   3
  -6  -3   6 110.102 8.79501   4
  -6  -3   6 107.077 9.19654   2
  -6  -3   6 129.005 9.18572   3
  -6   3   6 126.558 9.36928   3
  -5  -3   6 89.1418 7.17252   2
  -5  -3   6 87.1465 6.84226   4
  -5  -3   6 94.9718 7.41492   3
   4  -3  -6 21.5087 2.42082   2
  -4  -3   6 21.5626 2.55566   2
  -4  -3   6 27.8780 2.60999   3
  -4   3   6 33.9554 3.01416   3
   4   3  -6 27.7943 2.63037   3
  -3  -3   6 172.470 13.9813   2
  -3  -3   6 196.433 14.1678   3
  -3   3   6 196.756 14.4805   3
  -3   3   6 207.583 14.1398   4
  -2  -3   6 104.345 8.68979   2
  -2  -3   6 113.595 8.82556   3
   2  -3  -6 116.147 8.87745   4
  -2   3   6 127.871 8.90268   4
   2   3  -6 126.578 8.52328   2
  -2   3   6 116.971 9.11131   3
   1  -3  -6 363.165 27.2805   3
  -1  -3   6 385.272 26.8733   2
   1  -3  -6 347.667 27.2296   4
   1   3  -6 410.163 26.8767   2
  -1   3   6 395.863 27.2600   4
  -1   3   6 383.332 27.5501   3
   0  -3  -6 354.640 26.4994   4
   0  -3   6 368.839 26.0473   2
   0  -3  -6 369.727 26.4663   3
   0   3   6 378.049 26.4562   4
   0   3  -6 355.783 26.0769   2
   0   3   6 394.271 26.5970   3
   1  -3   6 23.1385 2.00650   2
  -1  -3  -6 23.0650 2.50166   4
  -1  -3  -6 29.9061 2.44320   3
   1   3   6 26.5977 2.41752   3
  -1   3  -6 24.1555 2.05453   2
  -2  -3  -6 27.9909 2.85641   4
   2  -3   6 25.5844 2.16517   2
   2   3   6 26.1823 2.19763   2
  -2   3  -6 25.1729 1.97067   5
   2   3   6 26.4872 2.39595   3
   3  -3   6 77.8256 6.75488   4
   3  -3   6 90.7428 6.59778   2
  -3  -3  -6 95.1732 7.06874   4
   3   3   6 84.3864 6.69963   2
   3   3   6 95.2371 6.79697   3
   4  -3   6 82.8711 7.17649   4
   4  -3   6 91.7762 7.08369   2
  -4  -3  -6 97.1809 7.53853   4
  -4  -3  -6 98.9771 7.07875   5
   4   3   6 101.173 7.24780   3
  -5  -3  -6 281.928 20.5309   5
  -5  -3  -6 289.927 20.9029   4
  -6  -3  -6 83.0413 6.53118   5
  -6  -3  -6 83.5773 6.89679   4
  -7  -3  -6 75.8506 6.15584   5
  -7  -3  -6 76.2505 6.58232   4
  -8  -3  -6 5.94609 1.44356   5
  -8  -3  -6 5.15589 1.83438   4
  -9  -3  -6 20.5362 2.71111   5
  -9  -3  -6 26.1108 3.49599   4
 -10  -3  -6 10.4616 2.05675   5
 -10  -3  -6 14.4247 2.66213   4
 -11  -3  -6 13.9599 2.54134   5
 -12  -3  -6 4.53536 1.84211   5
 -13  -3  -6 35.6254 4.35054   5
 -13   4   6 4.27790 2.76863   3
 -12   4   6 34.6642 4.66028   3
 -11  -4   6 3.47410 1.46253   3
 -11   4   6 2.31514 2.14364   3
 -10  -4   6 17.2091 2.47457   4
 -10  -4   6 14.7152 2.02995   3
 -10   4   6 15.2243 2.80737   3
  -9  -4   6 21.4297 2.60220   4
  -9  -4   6 21.5685 2.44506   3
  -9   4   6 18.0579 2.81876   3
  -8  -4   6 9.91946 1.71844   3
  -8  -4   6 10.1673 1.86436   4
  -8   4   6 8.48007 2.00334   3
  -7  -4   6 108.013 8.69899   4
  -7  -4   6 102.175 9.22390   2
  -7  -4   6 123.460 8.93896   3
  -7   4   6 127.188 9.30865   3
  -6  -4   6 258.468 21.3012   2
  -6  -4   6 287.824 21.1527   3
  -6  -4   6 281.381 20.9128   4
  -6   4   6 339.428 21.5766   3
  -5  -4   6 87.8988 7.40342   4
  -5  -4   6 103.403 7.72264   3
  -5  -4   6 89.7403 7.72209   2
  -5   4   6 114.132 8.02595   3
  -4  -4   6 47.6844 4.29078   4
  -4  -4   6 55.4030 4.45399   3
  -4  -4   6 49.3120 4.44780   2
  -4   4   6 64.3772 4.94702   3
  -3  -4   6 274.766 20.2442   3
   3  -4  -6 263.371 20.2214   4
  -3  -4   6 262.935 20.1646   2
  -3   4   6 291.300 20.6479   3
  -3   4   6 312.653 20.2416   4
  -2  -4   6 16.6457 1.70868   3
  -2  -4   6 15.2725 1.60245   2
   2  -4  -6 16.3196 1.80812   4
  -2   4   6 15.3497 1.91170   4
  -2   4   6 15.3594 2.07971   3
  -1  -4   6 30.8325 2.57406   2
   1  -4  -6 31.8544 2.96943   4
  -1   4   6 33.4762 2.93508   4
  -1   4   6 33.4297 3.18511   3
   0  -4  -6 57.3504 4.89924   4
   0  -4   6 55.9334 4.19869   2
   0  -4  -6 54.2863 4.59134   3
   0   4   6 57.8532 4.75600   3
  -1  -4  -6 97.3157 7.70517   3
  -1  -4  -6 102.460 7.89354   4
   1  -4   6 98.1945 7.40089   2
   1   4   6 111.074 7.89509   3
  -2  -4  -6 1.10152 0.76886   3
  -2  -4  -6 0.99474 0.91517   4
   2  -4   6 1.38254 0.46119   2
   2   4   6 1.13459 0.70204   3
   2   4   6 0.66397 0.55138   2
  -3  -4  -6 15.1093 2.14957   4
   3  -4   6 17.1218 1.65601   2
   3   4   6 17.8200 1.82997   3
   3   4   6 15.5346 1.83002   2
   4  -4   6 3.17207 0.99725   4
  -4  -4  -6 3.46554 1.13978   4
  -4  -4  -6 5.88448 0.92074   5
   4  -4   6 4.43420 0.96643   2
   4   4   6 4.15673 0.95956   3
   5  -4   6 111.816 8.83629   2
  -5  -4  -6 114.094 9.21795   4
  -5  -4  -6 124.837 8.84025   5
   5   4   6 119.190 8.81944   3
  -6  -4  -6 121.668 10.1183   4
  -6  -4  -6 126.298 9.75292   5
   6   4   6 139.518 9.74121   3
  -7  -4  -6 135.655 11.3536   4
  -7  -4  -6 144.774 11.0599   5
   7   4   6 158.552 11.3767   3
  -8  -4  -6 165.296 12.8760   4
  -9  -4  -6 3.39475 2.08210   4
  -9  -4  -6 -0.3384 0.93719   5
 -10  -4  -6 49.5440 4.77734   5
 -10  -4  -6 51.8065 5.58133   4
 -11  -4  -6 22.8352 4.31689   4
 -11  -4  -6 20.6014 2.92014   5
 -12  -4  -6 17.6867 2.89349   5
 -13  -4  -6 14.4285 2.75520   5
 -13   5   6 6.45995 3.37730   3
 -12  -5   6 12.8469 2.86297   4
 -12   5   6 16.1139 3.27345   3
 -11  -5   6 1.60192 1.60224   4
 -11   5   6 -2.4086 2.09843   3
 -10  -5   6 18.1292 2.69492   4
 -10   5   6 19.2217 3.19354   3
  -9  -5   6 8.44249 1.92021   4
  -9   5   6 7.96712 2.03043   3
  -8  -5   6 104.748 9.40940   2
  -8  -5   6 117.695 8.61924   3
  -8  -5   6 113.600 8.76357   4
  -8   5   6 115.916 9.22969   3
  -7  -5   6 55.1477 5.30424   2
  -7  -5   6 59.5467 4.80404   4
  -7  -5   6 45.6665 4.99454   3
  -7   5   6 66.3543 5.37864   3
  -6  -5   6 72.1231 6.67030   2
  -6  -5   6 79.6007 6.23678   4
  -6  -5   6 74.7442 6.39986   3
  -6   5   6 90.6728 6.80442   3
  -5  -5   6 210.909 16.8674   2
  -5  -5   6 218.550 16.5477   4
  -5  -5   6 227.898 16.6917   3
  -5   5   6 258.773 17.1450   3
  -4  -5   6 7.00686 1.59851   2
  -4  -5   6 8.69939 1.45130   3
  -4  -5   6 10.8814 1.59142   4
  -4   5   6 10.3386 1.87719   3
  -3  -5   6 151.571 11.2029   2
   3  -5  -6 152.706 10.7545   2
  -3  -5   6 163.401 11.2506   3
   3  -5  -6 151.397 11.2322   4
  -3  -5   6 137.056 11.0664   4
  -3   5   6 150.140 11.5568   3
  -2  -5   6 189.482 13.3109   2
  -2  -5   6 163.174 13.0045   5
   2  -5  -6 195.654 13.5571   4
   2  -5  -6 180.089 12.9425   2
  -2  -5   6 189.906 13.5061   3
  -2   5   6 187.628 13.8110   3
   1  -5  -6 65.3199 6.04231   4
  -1  -5   6 71.6832 5.23642   2
  -1   5   6 70.1252 5.80847   3
   0  -5   6 69.0863 4.81904   2
   0  -5  -6 55.1017 5.87142   3
   0  -5  -6 59.6856 5.24036   4
   0   5   6 68.9186 5.53689   3
   1  -5   6 60.3189 4.62666   2
  -1  -5  -6 55.9456 4.90163   3
  -1  -5  -6 63.4571 5.12422   4
   1   5   6 63.7575 5.10955   3
   1   5   6 63.5330 4.44341   2
  -2  -5  -6 31.2890 2.92174   2
  -2  -5  -6 35.4553 3.40670   4
  -2  -5  -6 35.7135 3.12736   3
   2  -5   6 40.3430 2.95844   2
   2   5   6 32.9371 2.80653   2
   2   5   6 42.8824 3.40764   3
   3  -5   6 39.0543 3.30526   2
  -3  -5  -6 40.1287 3.74807   4
   3   5   6 48.2328 3.62730   3
   3   5   6 36.0978 3.33043   2
  -4  -5  -6 320.065 24.7924   4
   4  -5   6 339.337 24.4629   2
   4   5   6 366.899 24.5139   3
  -5  -5  -6 22.4078 2.19359   5
   5  -5   6 21.1645 2.27865   2
  -5  -5  -6 24.4128 2.88586   4
  -6  -5  -6 235.446 17.7756   4
  -6  -5  -6 248.914 17.4567   5
   6  -5   6 233.266 17.4617   2
  -7  -5  -6 108.241 9.21325   4
   7  -5   6 117.394 9.05175   2
  -7  -5  -6 116.834 8.84381   5
  -8  -5  -6 155.459 11.4743   5
  -8  -5  -6 147.476 11.8017   4
   8  -5   6 145.612 11.4543   2
  -9  -5  -6 111.305 8.87284   5
  -9  -5  -6 110.315 9.31628   4
 -10  -5  -6 6.45095 3.29091   4
 -10  -5  -6 3.84902 1.47107   5
 -11  -5  -6 27.5107 3.50085   5
 -11  -5  -6 32.9243 4.78430   4
 -12  -5  -6 21.0220 4.23599   4
 -13  -5  -6 14.9784 2.65817   5
 -12  -6   6 25.2694 3.55748   4
 -12   6   6 18.3200 4.00563   3
 -11  -6   6 29.6085 3.53297   4
 -11   6   6 21.0168 3.69841   3
 -10  -6   6 25.5451 3.11345   4
 -10   6   6 15.1263 2.98840   3
  -9  -6   6 10.5305 2.75160   4
  -9   6   6 8.31847 2.20473   3
  -8  -6   6 25.0670 3.94275   2
  -8  -6   6 27.5261 2.94672   4
  -8   6   6 25.5069 3.25445   3
  -7  -6   6 -2.7056 1.76722   2
  -7  -6   6 1.75583 1.18413   4
  -7   6   6 0.11841 1.19478   3
  -6  -6   6 6.19186 1.50094   3
  -6  -6   6 10.1954 1.65555   4
  -6  -6   6 10.8469 2.14562   2
  -6   6   6 8.67715 1.90972   3
  -5  -6   6 67.7645 6.49340   2
  -5  -6   6 78.7769 6.13213   3
  -5  -6   6 79.3499 6.14118   4
   5  -6  -6 74.8945 5.79764   2
  -5   6   6 85.4451 6.65782   3
  -4  -6   6 21.8413 2.46422   4
  -4  -6   6 22.5775 2.72870   2
  -4  -6   6 26.4794 2.45544   3
  -4   6   6 26.5657 2.83474   3
   3  -6  -6 168.925 11.9966   2
  -3  -6   6 160.743 12.0894   5
  -3  -6   6 168.088 12.3995   4
   3  -6  -6 159.021 12.6701   4
  -3  -6   6 182.052 12.5263   2
  -3  -6   6 174.740 12.5759   3
  -2  -6   6 35.1612 3.55193   4
   2  -6  -6 43.1478 3.77558   4
   2  -6  -6 42.5448 3.12943   2
  -2  -6   6 44.7173 3.18281   5
  -2  -6   6 41.9877 3.54037   2
  -2   6   6 47.1544 4.03956   3
  -1  -6   6 142.613 9.62370   2
   1  -6  -6 128.954 9.98027   4
  -1   6   6 121.167 10.0746   3
   0  -6  -6 535.774 38.2788   4
   0  -6   6 556.219 37.8317   2
   0   6   6 554.610 38.3659   3
   0   6   6 502.413 37.6119   2
  -1  -6  -6 60.8960 4.97905   4
  -1  -6  -6 51.4512 4.42325   2
  -1  -6  -6 53.0785 4.73951   3
   1  -6   6 58.9226 4.43969   2
   1   6   6 64.3567 4.25597   2
   1   6   6 57.8582 5.09624   3
  -2  -6  -6 35.5476 3.06279   3
  -2  -6  -6 29.0553 2.86008   2
   2  -6   6 35.5682 2.81905   2
  -2  -6  -6 31.3036 3.27435   4
   2   6   6 37.9153 3.27144   3
   2   6   6 33.5810 2.66149   2
  -3  -6  -6 22.0945 2.19560   2
  -3  -6  -6 20.8274 2.55539   4
   3  -6   6 21.2173 2.02882   2
   3   6   6 19.4116 2.24435   3
   4  -6   6 299.691 21.4175   2
  -4  -6  -6 296.867 21.7977   4
  -5  -6  -6 46.7652 4.45808   4
   5  -6   6 47.4605 4.02337   2
  -6  -6  -6 4.20937 1.59930   4
   6  -6   6 2.19942 0.96801   2
  -6  -6  -6 2.79198 0.92479   5
  -7  -6  -6 57.2394 5.22222   5
   7  -6   6 44.4401 4.27778   2
  -7  -6  -6 44.8137 4.80390   4
   8  -6   6 17.4446 2.67914   2
  -8  -6  -6 20.0136 2.43627   5
  -8  -6  -6 19.3427 3.25141   4
  -9  -6  -6 19.9094 2.68781   5
   9  -6   6 22.7001 2.91916   2
  -9  -6  -6 21.1689 3.52398   4
  10  -6   6 11.7503 2.39776   2
 -10  -6  -6 15.2531 3.25363   4
 -10  -6  -6 12.0354 2.25808   5
 -11  -6  -6 24.4459 3.33515   5
 -11  -6  -6 28.2221 4.33640   4
  11  -6   6 27.0218 3.59823   2
  12  -6   6 6.37266 2.16644   2
 -12  -6  -6 7.80188 3.74879   4
 -12  -6  -6 2.88061 1.59034   5
 -12  -7   6 10.7771 2.69792   4
 -12  -7   6 6.64826 2.37995   5
 -12   7   6 9.72230 3.19207   3
 -11  -7   6 40.9874 4.47374   5
 -11  -7   6 52.2526 4.81981   4
 -11   7   6 35.3411 4.96935   3
 -10  -7   6 21.9170 3.14817   4
 -10  -7   6 13.4591 2.50469   5
 -10   7   6 14.8117 2.82656   3
  -9  -7   6 2.35780 2.21474   2
  -9  -7   6 4.01882 1.65826   4
  -9   7   6 3.82866 1.68198   3
  -8  -7   6 48.7371 5.11904   4
  -8  -7   6 44.1711 5.18338   2
  -8   7   6 47.6051 4.72168   3
   7  -7  -6 2.15795 0.96652   2
  -7  -7   6 4.29161 1.20209   5
  -7  -7   6 -0.0092 1.87950   2
  -7   7   6 3.46099 1.47921   3
  -6  -7   6 19.8104 2.15832   5
   6  -7  -6 19.5482 1.98842   2
  -6  -7   6 19.0426 3.22406   2
  -6  -7   6 19.9420 2.45643   4
  -6   7   6 21.1405 2.94712   3
  -5  -7   6 6.61334 1.42463   4
   5  -7  -6 7.11463 1.09764   2
  -5  -7   6 5.05591 1.09210   5
  -5  -7   6 5.39923 1.25214   3
  -5  -7   6 4.58912 1.63619   2
  -5   7   6 4.88301 1.59186   3
  -4  -7   6 91.1465 6.95874   4
  -4  -7   6 88.4687 6.96158   3
  -4  -7   6 90.8986 7.23462   2
   4  -7  -6 88.6104 6.55223   2
  -4  -7   6 82.8999 6.64862   5
  -4   7   6 96.2095 7.44360   3
   3  -7  -6 197.120 14.4268   2
   3  -7  -6 198.216 14.9599   4
  -3  -7   6 211.054 14.5153   5
  -3  -7   6 207.709 14.9159   3
  -3  -7   6 200.083 14.8441   4
  -3  -7   6 198.164 14.9289   2
  -3   7   6 211.801 15.2559   3
  -2  -7   6 2.17374 0.97180   4
   2  -7  -6 1.05234 1.06767   4
  -2  -7   6 4.11994 1.02376   2
   2  -7  -6 2.05305 0.47810   2
  -2   7   6 -0.4302 1.02455   3
  -1  -7   6 15.1326 2.00640   4
   1  -7  -6 18.0056 2.36321   4
  -1  -7   6 17.2753 1.84447   2
   1  -7  -6 21.5214 1.60049   2
  -1   7   6 17.1883 2.28901   3
   0  -7   6 252.203 16.5545   2
   0  -7  -6 236.144 17.0176   4
   0  -7   6 210.028 16.6719   4
   0  -7  -6 230.122 16.4299   2
   0   7   6 224.951 16.9607   3
  -1  -7  -6 12.4361 2.05343   4
   1  -7   6 13.6036 1.42972   2
   1  -7   6 11.2864 1.71843   4
  -1  -7  -6 11.8603 1.59322   2
   1   7   6 10.7926 1.86627   3
   1   7   6 14.5340 1.21395   2
  -2  -7  -6 7.39303 1.49101   2
   2  -7   6 8.99633 1.14261   2
  -2  -7  -6 7.96614 1.43228   3
  -2  -7  -6 5.37888 1.39468   4
   2   7   6 8.48155 1.53213   3
   2   7   6 7.78697 1.00988   2
  -3  -7  -6 8.53167 1.55419   3
  -3  -7  -6 5.89964 1.53242   4
   3  -7   6 6.80657 1.19471   2
  -3  -7  -6 6.90995 1.40913   2
   3   7   6 5.58439 1.42287   3
   4  -7   6 56.9993 4.59566   2
  -4  -7  -6 57.2939 5.11937   4
  -4  -7  -6 55.1221 4.77371   2
   5  -7   6 130.321 9.40420   2
  -5  -7  -6 116.578 9.78127   4
  -6  -7  -6 116.069 9.43729   4
   7  -7   6 309.732 22.8626   2
  -7  -7  -6 285.586 23.2040   4
  -7  -7  -6 346.371 22.8925   5
  -8  -7  -6 98.8545 8.46041   4
  -8  -7  -6 95.6589 7.71784   5
   8  -7   6 94.5692 7.82840   2
  -9  -7  -6 5.29361 1.54269   5
  -9  -7  -6 9.56802 2.96136   4
   9  -7   6 7.59575 1.96871   2
 -10  -7  -6 50.3850 5.98854   4
 -10  -7  -6 52.0724 4.84433   5
  10  -7   6 49.7376 4.95053   2
 -11  -7  -6 6.62912 3.29256   4
  11  -7   6 13.7046 2.74914   2
 -11  -7  -6 12.1106 2.30703   5
  12  -7   6 90.0880 7.44676   2
 -12  -7  -6 82.1255 7.20169   5
 -12  -7  -6 67.5017 8.53373   4
 -12  -8   6 33.9771 4.39877   5
  12  -8  -6 38.6408 4.14647   2
 -12  -8   6 37.7307 4.73878   4
 -12   8   6 34.1713 5.25756   3
  11  -8  -6 7.34266 2.05798   2
 -11  -8   6 4.05231 1.68381   5
 -11  -8   6 6.39588 2.39510   4
 -11   8   6 5.01119 2.86390   3
  10  -8  -6 52.2568 4.60266   2
 -10  -8   6 55.5116 5.19631   4
 -10  -8   6 46.2354 4.70929   5
 -10   8   6 46.9509 5.43596   3
  -9  -8   6 19.4071 2.80218   4
  -9  -8   6 15.3412 2.45511   5
  -9  -8   6 12.2330 3.35965   2
   9  -8  -6 20.8333 2.39629   2
  -9   8   6 14.6327 2.83800   3
  -8  -8   6 7.77383 1.91575   4
  -8  -8   6 2.91582 2.28415   2
   8  -8  -6 7.44132 1.47477   2
  -8   8   6 7.81081 1.95275   3
  -7  -8   6 17.9614 2.45064   4
  -7  -8   6 15.8986 2.09519   5
   7  -8  -6 18.9519 2.04734   2
  -7  -8   6 14.9764 2.97322   2
  -7   8   6 15.6297 2.62581   3
  -6  -8   6 25.6288 3.77322   2
   6  -8  -6 31.0885 2.77713   2
  -6  -8   6 39.3461 3.38516   4
  -6  -8   6 27.9282 2.87091   5
  -6   8   6 33.8728 3.61126   3
  -5  -8   6 412.616 30.1906   3
  -5  -8   6 403.307 30.7046   2
  -5  -8   6 428.991 30.0886   5
   5  -8  -6 422.657 29.9557   2
  -5  -8   6 434.043 30.3179   4
  -5   8   6 437.848 30.7764   3
  -4  -8   6 28.0257 3.50729   2
   4  -8  -6 35.5490 2.78132   2
  -4  -8   6 34.2915 3.31020   4
  -4  -8   6 37.6673 2.88435   5
  -4  -8   6 34.2916 3.62461   3
   4  -8  -6 32.5649 3.42950   4
  -4   8   6 33.4570 3.55180   3
   3  -8  -6 266.060 18.9774   4
  -3  -8   6 247.536 18.8814   2
  -3  -8   6 270.258 18.8122   4
   3  -8  -6 257.440 18.3377   2
  -3  -8   6 258.866 18.8187   3
  -3   8   6 253.802 19.1523   3
   2  -8  -6 234.668 17.2198   4
   2  -8  -6 229.190 16.5546   2
  -2  -8   6 230.523 16.9549   4
  -2  -8   6 212.753 16.8832   2
  -2   8   6 262.717 17.3940   3
  -1  -8   6 7.41196 1.20614   2
   1  -8  -6 2.83404 1.42684   4
  -1  -8   6 4.67968 1.25947   4
   1  -8  -6 5.87812 0.86719   2
  -1   8   6 4.57093 0.79681   2
  -1   8   6 4.82560 1.37730   3
   0  -8   6 42.7636 3.32040   2
   0  -8  -6 40.4605 3.25418   2
   0  -8  -6 36.4261 3.81653   4
   0  -8   6 40.8769 3.54706   4
   0   8   6 44.4424 3.79870   3
   0   8   6 35.2704 3.06310   2
   1  -8   6 130.614 9.92603   4
  -1  -8  -6 128.043 10.2413   4
   1  -8   6 141.938 9.75957   2
   1   8   6 128.105 10.0356   3
   1   8   6 133.275 9.55081   2
   2  -8   6 64.8471 4.91591   2
  -2  -8  -6 64.9589 5.50520   4
   2  -8   6 61.4834 5.09016   4
  -2  -8  -6 57.1935 5.18088   3
  -2  -8  -6 59.6174 5.06774   2
   2   8   6 68.8553 5.42110   3
  -3  -8  -6 2.60124 1.04640   3
  -3  -8  -6 0.83146 1.22426   2
   3  -8   6 -0.0486 0.65971   2
  -3  -8  -6 3.90882 1.42323   4
   3  -8   6 1.26127 0.98116   4
   3   8   6 0.46764 1.00798   3
  -4  -8  -6 166.992 12.9721   4
  -4  -8  -6 156.110 12.6387   2
   4  -8   6 175.879 12.4865   2
   4  -8   6 175.767 12.4283   4
   5  -8   6 14.1745 2.01030   2
  -5  -8  -6 15.9574 2.56600   4
   6  -8   6 30.6756 3.14336   2
  -6  -8  -6 32.0107 4.98656   4
   7  -8   6 31.9061 3.32508   2
  -7  -8  -6 33.3635 4.19680   4
   8  -8   6 4.53785 1.38935   2
  -8  -8  -6 4.26730 2.43718   4
  -8  -8  -6 2.24305 1.11542   5
  -9  -8  -6 42.2886 4.06788   5
   9  -8   6 42.3657 4.12647   2
  -9  -8  -6 35.9589 5.48172   4
  10  -8   6 0.94329 1.55122   2
 -10  -8  -6 0.87539 2.92816   4
 -10  -8  -6 1.25871 1.15858   5
 -11  -8  -6 19.9220 4.24118   4
  11  -8   6 18.2984 3.27461   2
 -11  -8  -6 20.0519 4.87969   5
  12  -8   6 2.58639 1.95894   2
 -12  -8  -6 3.02664 1.75726   5
 -12  -8  -6 -2.4694 4.02318   4
 -11  -9   6 7.13940 1.93540   5
  11  -9  -6 12.4767 2.26106   2
 -11  -9   6 8.25412 2.58386   4
 -11   9   6 0.87811 2.71759   3
 -10  -9   6 18.7650 2.81637   5
  10  -9  -6 20.6812 2.73397   2
 -10   9   6 13.4536 3.11807   3
  -9  -9   6 8.45839 2.19964   4
   9  -9  -6 8.29725 1.74406   2
  -9  -9   6 4.32166 2.61146   2
  -9  -9   6 8.56830 1.75538   5
  -9   9   6 4.29660 2.11204   3
  -8  -9   6 58.9611 6.39356   2
   8  -9  -6 68.7344 5.62224   2
  -8  -9   6 64.5089 5.67925   4
  -8  -9   6 62.6258 5.33629   5
  -8   9   6 58.8548 5.84497   3
  -7  -9   6 40.7456 3.87414   4
  -7  -9   6 38.9350 3.50264   5
   7  -9  -6 39.7344 3.38863   2
  -7  -9   6 37.5149 4.67939   2
  -7   9   6 32.4897 4.00545   3
  -6  -9   6 14.6218 1.75094   5
  -6  -9   6 10.8991 2.62703   2
  -6  -9   6 13.8040 2.24329   4
   6  -9  -6 14.2254 1.67065   2
  -6   9   6 14.1937 2.41607   3
  -5  -9   6 9.86857 1.34177   5
  -5  -9   6 5.51174 2.03245   2
   5  -9  -6 8.83693 1.28323   2
  -5   9   6 5.85204 1.85842   3
   4  -9  -6 52.8962 4.35376   2
  -4  -9   6 56.4731 4.78204   3
  -4  -9   6 52.0658 5.58026   2
  -4  -9   6 54.1054 4.89517   4
   4  -9  -6 54.4630 5.03482   4
  -4  -9   6 68.7489 4.50109   5
  -4   9   6 59.6569 5.34628   3
   3  -9  -6 18.0277 2.69254   4
   3  -9  -6 17.6291 1.63859   2
  -3  -9   6 25.2079 2.53940   4
  -3  -9   6 12.9073 2.34807   2
  -3   9   6 18.3906 2.68742   3
  -2  -9   6 80.3546 6.46416   2
   2  -9  -6 83.7619 6.00821   2
   2  -9  -6 78.8800 6.78712   4
  -2  -9   6 86.0364 6.53646   4
  -2   9   6 78.1668 6.77273   3
   1  -9  -6 51.7111 4.89898   4
   1  -9  -6 57.0803 4.18822   2
  -1  -9   6 52.0834 4.57785   4
  -1  -9   6 55.3359 4.45488   2
  -1   9   6 52.7579 4.78621   3
   0  -9  -6 -0.2954 0.88350   2
   0  -9  -6 0.70831 1.18129   4
   0  -9   6 1.54489 1.11823   4
   0  -9   6 1.45142 0.77934   2
   0   9   6 4.24479 1.39122   3
  -1  -9  -6 93.1558 7.79107   4
  -1  -9  -6 94.8703 7.32730   2
   1  -9   6 101.444 7.24507   2
   1  -9   6 101.745 7.44458   4
   1   9   6 86.3639 7.45751   3
   2  -9   6 10.9486 1.70061   4
  -2  -9  -6 9.70431 2.04943   4
   2  -9   6 10.7054 1.50017   2
  -2  -9  -6 9.20878 1.73385   2
   2   9   6 9.47038 1.70015   3
  -3  -9  -6 175.760 14.9422   3
   3  -9   6 229.814 15.0390   2
   3  -9   6 223.266 15.0528   4
  -3  -9  -6 212.850 15.6171   4
  -3  -9  -6 192.454 15.1516   2
   3   9   6 202.405 14.9093   3
   4  -9   6 77.4832 5.91666   4
   4  -9   6 74.3668 6.21502   2
  -4  -9  -6 74.1177 6.60548   4
  -4  -9  -6 69.3316 6.23524   2
  -5  -9  -6 42.3642 4.70513   2
  -5  -9  -6 49.1755 5.67980   4
   5  -9   6 50.7444 4.21195   2
   6  -9   6 105.187 8.09718   2
  -6  -9  -6 99.5099 8.80571   4
   7  -9   6 71.8542 5.98430   2
  -7  -9  -6 68.6964 6.79617   4
   8  -9   6 5.09168 1.50483   2
  -8  -9  -6 2.81382 2.67059   4
  -9  -9  -6 1.91614 2.79372   4
   9  -9   6 2.31078 1.39827   2
  10  -9   6 10.8859 2.40584   2
 -10  -9  -6 11.0290 2.24021   5
 -10  -9  -6 9.68703 3.29062   4
  11  -9   6 1.52291 1.62526   2
 -11  -9  -6 -5.1306 3.49405   4
 -11  -9  -6 -1.0098 1.19205   5
 -11 -10   6 1.40265 2.33560   4
  11 -10  -6 6.79210 2.09342   2
 -11 -10   6 7.00229 1.88885   5
 -11  10   6 2.71435 2.76268   3
 -10 -10   6 3.40165 1.46360   5
  10 -10  -6 3.82543 1.60770   2
 -10 -10   6 4.20738 2.21437   4
 -10 -10   6 2.15895 2.98025   2
 -10  10   6 1.04143 2.38391   3
   9 -10  -6 82.5708 6.15871   2
  -9 -10   6 73.3471 6.61769   4
  -9 -10   6 74.9755 6.24240   5
  -9  10   6 64.5707 6.91586   3
   8 -10  -6 14.0680 1.96604   2
  -8 -10   6 13.1890 2.59547   4
  -8 -10   6 13.2391 2.04097   5
  -8 -10   6 10.0620 2.83006   2
  -8  10   6 11.3801 2.51154   3
  -7 -10   6 17.5895 2.04484   5
  -7 -10   6 8.83351 2.86267   2
   7 -10  -6 15.8035 1.98513   2
  -7 -10   6 12.1753 2.48584   4
  -7  10   6 17.7856 2.89926   3
  -6 -10   6 2.07689 0.81132   5
   6 -10  -6 2.08083 0.83819   2
  -6 -10   6 0.94534 1.32101   4
  -6 -10   6 3.51215 2.07221   2
  -6  10   6 1.08407 1.51798   3
  -5 -10   6 0.92667 1.26027   4
  -5 -10   6 1.53574 0.62773   5
   5 -10  -6 1.57593 0.68591   2
  -5 -10   6 1.68788 1.67623   2
  -5  10   6 -1.5892 1.49087   3
  -4 -10   6 144.129 10.3601   4
   4 -10  -6 135.328 9.79869   2
   4 -10  -6 135.032 10.5145   4
  -4 -10   6 128.856 10.2035   3
  -4 -10   6 122.848 10.5765   2
  -4  10   6 144.232 10.7665   3
   3 -10  -6 265.997 18.4277   2
  -3 -10   6 232.157 19.0156   2
  -3 -10   6 263.599 19.0380   4
   3 -10  -6 258.204 19.1852   4
  -3  10   6 276.000 19.3282   3
  -2 -10   6 70.1952 6.48530   2
   2 -10  -6 78.6951 6.60434   4
  -2 -10   6 73.8342 6.17137   4
   2 -10  -6 79.8712 5.63777   2
  -2  10   6 71.0193 6.37904   3
  -1 -10   6 8.46893 1.58828   2
  -1 -10   6 10.4258 1.87415   4
   1 -10  -6 8.44215 1.31440   2
   1 -10  -6 9.34786 2.16211   4
  -1  10   6 5.70049 1.79027   3
   0 -10   6 17.5251 2.44291   4
   0 -10  -6 15.2837 2.09007   2
   0 -10  -6 20.3483 2.88736   4
   0 -10   6 18.8878 2.08782   2
   0  10   6 16.8219 2.54528   3
   1 -10   6 3.70006 1.39021   4
  -1 -10  -6 1.94027 1.33817   2
  -1 -10  -6 3.73499 1.62982   4
   1 -10   6 2.92662 0.96325   2
   1  10   6 2.95155 1.40468   3
  -2 -10  -6 73.0713 6.53342   4
   2 -10   6 81.3477 6.02111   4
  -2 -10  -6 71.4409 6.05771   2
   2 -10   6 75.6142 6.05686   2
   2  10   6 67.2359 5.82079   3
  -3 -10  -6 67.2280 6.16247   2
  -3 -10  -6 79.3032 6.98535   4
   3 -10   6 77.3106 5.93060   4
   3 -10   6 80.6441 5.87057   2
  -3 -10  -6 63.3296 5.89632   3
  -4 -10  -6 10.5726 2.42926   4
   4 -10   6 11.6528 1.84106   4
  -4 -10  -6 6.57724 2.04826   2
   4 -10   6 9.87145 1.64190   2
  -5 -10  -6 40.9896 4.59631   4
   5 -10   6 36.7106 3.49737   2
  -5 -10  -6 35.3793 4.25511   2
   6 -10   6 13.3119 2.19448   2
  -6 -10  -6 11.1426 2.75557   4
  -7 -10  -6 6.09767 2.79342   4
   7 -10   6 7.49420 1.65064   2
  -8 -10  -6 68.8298 7.39543   4
   8 -10   6 70.3687 6.09264   2
  -9 -10  -6 -0.1020 3.30306   4
   9 -10   6 2.12014 1.45646   2
 -10 -10  -6 21.9461 4.48776   4
  10 -10   6 18.5436 3.18495   2
  11 -10   6 8.40161 2.43386   2
 -10 -11   6 3.09066 3.21140   2
 -10 -11   6 4.57376 4.27105   4
  10 -11  -6 4.27878 1.75098   2
 -10 -11   6 3.98200 1.45981   5
 -10  11   6 5.06569 2.66144   3
  -9 -11   6 17.8871 2.33348   5
   9 -11  -6 14.4262 2.33954   2
  -9 -11   6 17.0306 3.13115   4
   8 -11  -6 19.5478 2.44829   2
  -8 -11   6 18.2194 2.95607   4
  -8 -11   6 15.7655 3.83940   2
  -8 -11   6 23.7658 2.46421   5
  -8  11   6 12.9144 2.90232   3
  -7 -11   6 3.98055 2.39524   2
   7 -11  -6 11.3164 1.65366   2
  -7 -11   6 10.9140 2.17762   4
  -7  11   6 5.96499 2.32377   3
  -6 -11   6 0.94939 2.05784   2
  -6 -11   6 2.38254 1.38742   4
   6 -11  -6 1.52347 0.88003   2
  -6  11   6 0.18845 1.61574   3
  -5 -11   6 33.4538 3.53242   4
   5 -11  -6 33.1802 2.84683   2
  -5 -11   6 27.6419 3.98951   2
  -5  11   6 38.0616 4.03401   3
  -4 -11   6 120.038 10.6481   2
   4 -11  -6 141.177 9.87592   2
  -4 -11   6 125.370 10.2343   3
   4 -11  -6 140.844 10.7214   4
  -4 -11   6 134.972 10.4538   4
  -4  11   6 152.065 10.9113   3
  -3 -11   6 10.2214 1.92099   4
  -3 -11   6 3.74997 1.71259   2
   3 -11  -6 9.81693 1.26602   2
   3 -11  -6 7.77645 2.15471   4
  -3  11   6 9.51299 2.10411   3
  -2 -11   6 18.2452 2.52425   2
  -2 -11   6 21.4283 2.63612   4
   2 -11  -6 19.1266 1.92334   2
   2 -11  -6 14.9587 2.76305   4
  -2  11   6 17.2657 2.63117   3
   1 -11  -6 204.812 14.4782   2
   1 -11  -6 196.106 15.2201   4
  -1 -11   6 196.411 14.8457   4
  -1 -11   6 196.598 14.7220   2
  -1  11   6 206.093 15.0628   3
   0 -11   6 49.7593 4.09193   2
   0 -11   6 49.1459 4.32252   4
   0 -11  -6 41.1067 4.05451   2
   0 -11  -6 45.5042 4.79797   4
   0  11   6 50.5057 4.48314   3
  -1 -11  -6 57.4048 5.55249   2
   1 -11   6 73.2944 5.42076   2
   1 -11   6 68.7640 5.65251   4
  -1 -11  -6 72.9679 6.21126   4
   1  11   6 65.9556 5.53987   3
  -1  11  -6 64.7422 5.07052   5
   2 -11   6 42.8712 3.83582   4
  -2 -11  -6 47.3711 4.60962   4
   2 -11   6 41.6848 3.55703   2
  -2 -11  -6 37.4067 4.02272   2
   2  11   6 32.8131 3.55467   3
  -3 -11  -6 152.010 12.2316   4
   3 -11   6 154.585 11.4223   2
   3 -11   6 165.605 11.5423   4
  -3 -11  -6 139.014 11.7340   2
  -4 -11  -6 3.50065 2.11980   4
  -4 -11  -6 2.77786 2.18460   2
   4 -11   6 3.11576 1.31993   4
   4 -11   6 0.81032 0.98935   2
   5 -11   6 69.1270 5.45970   2
  -5 -11  -6 62.4341 6.15161   2
   5 -11   6 61.6355 5.30789   4
  -5 -11  -6 67.8232 6.72115   4
   6 -11   6 4.99072 1.59813   2
  -6 -11  -6 7.07023 2.77345   4
   7 -11   6 1.01474 1.20585   2
  -7 -11  -6 1.71983 2.87128   4
  -8 -11  -6 42.8328 6.39829   4
   8 -11   6 45.5675 4.42649   2
   9 -11   6 4.87402 2.35088   2
  -9 -11  -6 2.13517 3.50450   4
  10 -11   6 16.8989 3.17433   2
  10 -12  -6 4.45859 1.82787   2
 -10 -12   6 4.73765 1.48566   5
 -10 -12   6 6.43936 3.48005   2
 -10 -12   6 0.86209 2.36414   4
 -10  12   6 3.03339 3.11378   3
   9 -12  -6 59.4835 5.12748   2
  -9 -12   6 64.9913 5.19219   5
  -9  12   6 47.1495 6.20728   3
  -8 -12   6 29.7383 3.94737   4
  -8 -12   6 22.6874 4.55102   2
   8 -12  -6 35.4551 3.29150   2
  -8  12   6 32.6637 4.49148   3
   7 -12  -6 68.2852 5.34783   2
  -7 -12   6 64.3793 6.06150   4
  -7 -12   6 58.7614 6.66066   2
  -7  12   6 69.9552 6.63145   3
  -6 -12   6 14.3605 2.55413   4
  -6 -12   6 10.2551 2.69249   2
  -6  12   6 13.7588 2.85535   3
  -5 -12   6 41.2457 4.19323   4
  -5 -12   6 34.0447 4.50151   2
   5 -12  -6 43.7176 3.49433   2
  -5  12   6 46.2365 4.76014   3
   4 -12  -6 9.10842 2.63484   4
   4 -12  -6 14.8872 1.63556   2
  -4 -12   6 11.6113 2.17783   4
  -4 -12   6 9.91352 2.45166   2
  -4  12   6 18.5492 2.93817   3
   3 -12  -6 41.1907 4.78117   4
   3 -12  -6 44.7590 3.53748   2
  -3 -12   6 38.4834 4.28814   2
  -3 -12   6 39.9515 4.13848   4
  -3  12   6 48.3087 4.57976   3
  -2 -12   6 42.4139 4.04115   4
   2 -12  -6 43.5574 4.73367   4
   2 -12  -6 39.5672 3.44506   2
  -2 -12   6 36.4464 3.97475   2
  -2  12   6 43.5981 4.66726   3
   1 -12  -6 1.78976 1.97707   4
   1 -12  -6 0.34156 1.07588   2
  -1 -12   6 2.92474 1.53091   4
  -1 -12   6 0.31639 1.10778   2
  -1  12   6 0.25655 1.53998   3
   0 -12  -6 74.4157 7.54545   4
   0 -12   6 70.3893 6.02360   4
   0 -12   6 71.4556 5.79426   2
   0 -12  -6 69.1425 5.74735   2
   0  12   6 68.8567 6.02133   3
   1 -12   6 20.7270 2.51295   2
  -1 -12  -6 17.4980 2.96658   2
   1 -12   6 28.6091 3.17194   4
  -1 -12  -6 30.1420 3.80948   4
   1  12   6 22.3277 2.87375   3
  -2 -12  -6 132.326 10.7181   2
   2 -12   6 142.921 10.5205   4
  -2 -12  -6 149.294 11.3225   4
   2 -12   6 145.613 10.3818   2
  -2  12  -6 136.340 9.99263   5
   2  12   6 122.338 10.3722   3
   3 -12   6 124.191 9.38627   4
  -3 -12  -6 124.718 10.3118   4
  -3 -12  -6 119.432 9.85914   2
   3 -12   6 119.357 9.26296   2
   4 -12   6 46.6954 4.18702   4
  -4 -12  -6 41.3929 4.97813   2
  -4 -12  -6 42.3886 5.22780   4
   4 -12   6 47.6029 4.11197   2
   5 -12   6 42.4153 3.75873   2
  -5 -12  -6 40.1254 5.36307   4
   5 -12   6 36.5458 3.72147   4
  -5 -12  -6 36.5341 4.79356   2
  -6 -12  -6 18.2331 3.76344   2
   6 -12   6 19.4318 2.51507   2
  -6 -12  -6 18.1847 3.97867   4
  -7 -12  -6 -0.0249 3.32447   4
   7 -12   6 -0.0327 1.15152   2
  -8 -12  -6 15.9696 4.18796   4
   8 -12   6 10.4268 2.31916   2
   9 -12   6 25.7453 3.61422   2
  -9 -12  -6 19.5901 6.00203   4
  -9 -13   6 2.14123 3.14965   2
  -9 -13   6 3.40868 2.42846   4
   9 -13  -6 2.92616 1.52980   2
  -9  13   6 -0.6452 2.95567   3
  -8 -13   6 46.7762 5.61335   4
   8 -13  -6 40.7047 3.93389   2
  -8  13   6 42.5753 5.49498   3
   7 -13  -6 11.0403 1.75375   2
  -7 -13   6 4.53348 2.81607   2
  -7 -13   6 14.2246 2.71543   4
  -7  13   6 8.45172 2.63000   3
  -6 -13   6 10.3644 3.02089   2
   6 -13  -6 10.2617 1.68654   2
  -6 -13   6 10.1011 2.44483   4
  -6  13   6 11.7912 3.03682   3
  -5 -13   6 13.6932 2.44708   4
  -5 -13   6 7.46914 2.63845   2
  -5  13   6 10.4549 2.86113   3
  -4 -13   6 18.4860 3.37723   2
  -4 -13   6 26.2490 3.26858   4
   4 -13  -6 21.2530 3.68105   4
  -4 -13   6 26.0055 2.96158   3
   4 -13  -6 27.4808 2.48946   2
  -4  13   6 25.5247 3.73506   3
  -3 -13   6 12.5777 2.66415   2
   3 -13  -6 15.2343 1.93236   2
  -3 -13   6 15.5534 2.63141   4
   3 -13  -6 15.9513 3.14850   4
  -3  13   6 12.3485 2.75899   3
  -2 -13   6 17.2002 2.70438   4
  -2 -13   6 12.2440 2.68864   2
   2 -13  -6 22.5820 4.78845   4
   2 -13  -6 15.2416 2.06419   2
  -2  13   6 17.7995 2.99186   3
  -1 -13   6 20.3726 2.77557   4
  -1 -13   6 16.4199 2.64381   2
   1 -13  -6 17.7336 2.44441   2
   1 -13  -6 18.5181 3.35980   4
  -1  13   6 24.0538 4.71022   3
   0 -13   6 22.7178 2.78344   4
   0 -13  -6 18.3127 3.40504   4
   0 -13  -6 15.3258 2.53293   2
   0 -13   6 16.7231 2.55812   2
   0  13   6 19.3646 3.11601   3
   1 -13   6 45.7683 4.23896   4
  -1 -13  -6 45.3873 5.22589   4
   1 -13   6 41.7485 3.87335   2
  -1 -13  -6 39.1397 4.28724   2
   1  13   6 35.6137 4.06147   3
  -2 -13  -6 33.9944 4.49368   2
  -2 -13  -6 48.6551 5.55086   4
   2 -13   6 46.6718 4.24518   4
   2 -13   6 49.5559 3.97187   2
   2  13   6 32.9295 4.10645   3
  -3 -13  -6 11.8716 2.85646   2
   3 -13   6 13.4878 2.14019   2
   3 -13   6 14.0599 3.21962   4
  -3 -13  -6 17.6316 3.44929   4
  -4 -13  -6 29.0076 4.52431   4
   4 -13   6 28.1460 3.02304   2
   4 -13   6 26.9503 3.24821   4
  -4 -13  -6 28.9178 4.17876   2
  -5 -13  -6 10.3281 3.20207   2
  -5 -13  -6 12.9930 3.61235   4
   5 -13   6 11.4307 1.99564   2
  -6 -13  -6 24.0895 4.42311   2
   6 -13   6 23.0759 2.88641   2
  -6 -13  -6 24.2348 4.74453   4
   7 -13   6 6.02121 1.85004   2
  -7 -13  -6 15.1537 4.11910   4
  -8 -13  -6 17.1422 5.03297   4
   8 -13   6 22.3931 3.15105   2
   9 -13   6 35.3162 4.06431   2
  -9 -13  -6 29.1257 6.08044   4
  -8 -14   6 6.93033 2.70504   4
  -8 -14   6 5.68290 3.22739   2
   8 -14  -6 3.08253 1.56145   2
  -8  14   6 10.4837 3.60819   3
  -7 -14   6 3.46032 3.05179   2
   7 -14  -6 3.21563 1.38742   2
  -7 -14   6 3.57913 2.17159   4
  -7  14   6 4.10834 2.86867   3
  -6 -14   6 27.1605 4.25564   4
   6 -14  -6 25.7645 2.63666   2
  -6 -14   6 10.4164 5.68035   2
  -6  14   6 20.0884 4.03694   3
  -5 -14   6 1.60256 1.76614   4
   5 -14  -6 1.23179 1.15130   2
  -5 -14   6 -0.7452 2.06838   2
  -5  14   6 1.34064 2.58958   3
  -4 -14   6 19.6818 3.01596   4
   4 -14  -6 16.8678 2.19189   2
  -4 -14   6 13.4521 2.96795   2
  -4  14   6 12.7442 3.42591   3
   3 -14  -6 1.08917 1.30480   2
  -3 -14   6 -0.6139 1.66479   2
  -3 -14   6 0.27318 1.54719   4
   3 -14  -6 2.40193 3.35467   4
  -3  14   6 -0.4385 2.27908   3
  -2 -14   6 1.50770 1.72479   2
   2 -14  -6 8.73100 2.91475   4
   2 -14  -6 3.74964 1.46178   2
  -2 -14   6 6.08361 1.89297   4
  -2  14   6 2.51543 2.37438   3
  -1 -14   6 37.5592 3.97515   4
   1 -14  -6 33.5249 3.58021   2
   1 -14  -6 42.9233 5.20792   4
  -1 -14   6 33.3680 3.76327   2
  -1  14   6 26.9027 4.14785   3
   0 -14  -6 20.8773 3.85030   4
   0 -14   6 17.8578 2.94492   4
   0 -14   6 23.3025 2.83088   2
   0 -14  -6 18.1976 2.98892   2
   0  14   6 15.6023 4.12975   3
   1 -14   6 31.5454 3.37247   2
   1 -14   6 29.4096 3.57809   4
  -1 -14  -6 31.1360 4.10282   2
  -1 -14  -6 40.6279 5.15199   4
   1  14   6 23.7613 3.85175   3
   2 -14   6 2.64591 1.45722   2
   2 -14   6 1.58297 1.61818   4
  -2 -14  -6 3.92957 2.76644   4
   2  14   6 1.18549 2.05023   3
  -3 -14  -6 26.5623 4.35022   4
   3 -14   6 19.7698 2.65203   2
   3 -14   6 21.0154 3.00470   4
  -3 -14  -6 18.6860 3.80481   2
  -4 -14  -6 28.4038 4.57271   2
   4 -14   6 29.5900 3.18515   2
  -4 -14  -6 32.8079 5.01538   4
   4 -14   6 22.7746 3.41010   4
  -5 -14  -6 13.6524 3.95746   4
   5 -14   6 11.5662 2.65238   4
  -5 -14  -6 10.0491 3.76715   2
   5 -14   6 11.7870 2.11909   2
  -6 -14  -6 9.39616 4.83285   4
  -6 -14  -6 11.7070 3.82938   2
   6 -14   6 11.2861 2.88259   2
   7 -14   6 58.1245 5.38160   2
  -7 -14  -6 59.2091 7.96273   4
  -8 -14  -6 10.2866 5.40470   4
   8 -14   6 13.3487 2.52324   2
  -7 -15   6 43.5028 4.95592   4
  -7 -15   6 26.7682 5.16729   2
   7 -15  -6 43.5490 3.78695   2
  -7  15   6 32.0707 5.57815   3
  -6 -15   6 10.5673 3.48858   2
   6 -15  -6 18.3274 2.44860   2
  -6  15   6 13.9475 3.88678   3
  -5 -15   6 0.70946 1.91236   4
  -5 -15   6 0.35064 2.48942   2
   5 -15  -6 3.08798 1.46273   2
  -5  15   6 3.23792 3.05488   3
  -4 -15   6 4.58548 2.68095   2
   4 -15  -6 9.78712 3.27414   4
   4 -15  -6 10.3119 1.84271   2
  -4 -15   6 10.7440 2.60692   4
  -4  15   6 8.15570 3.44917   3
   3 -15  -6 27.8327 4.74166   4
  -3 -15   6 25.8787 3.52800   4
   3 -15  -6 27.1238 2.94967   2
  -3 -15   6 21.2900 3.77325   2
  -3  15   6 18.2755 4.12631   3
   2 -15  -6 5.90945 2.97259   4
  -2 -15   6 2.18185 1.86089   4
   2 -15  -6 2.49179 1.71103   2
  -2 -15   6 1.29485 1.75001   2
  -2  15   6 1.91669 2.50495   3
  -1 -15   6 20.5618 3.32310   4
  -1 -15   6 17.6107 3.03259   2
   1 -15  -6 21.5862 3.93702   4
   1 -15  -6 22.8673 3.11141   2
  -1  15   6 17.4213 3.59160   3
   0 -15   6 23.3052 3.42224   4
   0 -15  -6 22.0581 3.97218   4
   0 -15   6 21.1363 3.13070   2
   0 -15  -6 20.8342 3.46846   2
   0  15   6 15.5213 3.57058   3
   1 -15   6 16.1724 2.61626   2
   1 -15   6 19.9149 2.97517   4
  -1 -15  -6 12.5992 3.18355   2
  -1 -15  -6 13.8247 3.56800   4
  -2 -15  -6 33.4709 6.06192   4
   2 -15   6 40.0974 3.96599   2
   2 -15   6 37.5880 4.48052   4
  -2 -15  -6 40.4996 5.13572   2
  -3 -15  -6 20.2007 4.02218   2
   3 -15   6 23.3096 3.34733   4
   3 -15   6 24.8893 3.00507   2
  -3 -15  -6 19.1961 4.33173   4
  -4 -15  -6 2.23844 3.57295   4
   4 -15   6 2.57479 1.70012   2
  -4 -15  -6 2.56398 3.15723   2
  -5 -15  -6 3.36893 3.53164   2
  -5 -15  -6 9.12948 4.20999   4
   5 -15   6 5.70102 1.93854   2
  -6 -15  -6 84.7932 9.64733   4
   6 -15   6 72.9298 6.45569   2
  -6 -15  -6 72.1504 8.37490   2
  -7 -15  -6 2.39668 4.23547   4
   7 -15   6 -1.6905 1.52476   2
  -5 -16   6 19.3137 3.60748   4
  -5 -16   6 14.7074 3.89550   2
   5 -16  -6 20.6352 2.50041   2
  -5  16   6 11.1598 4.21620   3
  -4 -16   6 -0.4407 2.43008   2
  -4 -16   6 1.43557 2.23430   4
   4 -16  -6 -2.5137 3.32459   4
   4 -16  -6 -3.0233 1.52879   2
  -4  16   6 0.35216 3.44796   3
  -3 -16   6 -5.4340 2.23951   2
   3 -16  -6 1.12661 1.86270   2
   3 -16  -6 -0.8002 3.24664   4
  -3 -16   6 -0.3615 2.09934   4
  -3  16   6 -0.7471 3.19381   3
   2 -16  -6 17.4155 2.92027   2
  -2 -16   6 13.1111 3.75576   2
  -2 -16   6 18.0330 3.56444   4
   2 -16  -6 17.2310 4.14803   4
  -2  16   6 18.1696 4.16904   3
  -1 -16   6 42.0527 4.84899   4
   1 -16  -6 49.0352 6.31240   4
   1 -16  -6 49.9520 4.90504   2
  -1 -16   6 38.3430 7.23201   2
  -1  16   6 29.9938 5.40465   3
   0 -16  -6 5.57905 3.46321   4
   0 -16   6 10.1972 2.49953   4
   0 -16  -6 9.75597 2.84652   2
   0 -16   6 5.79168 3.25608   2
  -1 -16  -6 24.6494 4.21761   2
  -1 -16  -6 19.1588 4.45297   4
   1 -16   6 31.4234 4.18289   4
  -2 -16  -6 27.7708 4.44919   2
   2 -16   6 29.7579 4.24064   4
   2 -16   6 28.9277 4.22929   2
  -2 -16  -6 26.2324 4.99833   4
   3 -16   6 17.9123 2.71202   2
  -3 -16  -6 15.7374 4.35803   2
   3 -16   6 19.8809 3.57601   4
  -4 -16  -6 25.9912 4.81221   2
   4 -16   6 19.7197 3.48895   4
   4 -16   6 16.6447 2.62168   2
  -4 -16  -6 19.6953 4.89769   4
  -5 -16  -6 7.86671 4.21287   2
   5 -16   6 2.78565 2.53618   4
  -5 -16  -6 10.2435 4.86243   4
   5 -16   6 7.04180 2.03801   2
  -3 -17   6 8.07173 2.86804   2
  -3 -17   6 10.0592 3.02727   4
   3 -17  -6 6.99023 2.35864   2
   3 -17  -6 9.61022 4.44569   4
  -2 -17   6 9.29891 2.96107   2
   2 -17  -6 5.33089 2.52493   2
   2 -17  -6 3.08523 3.96876   4
  -2 -17   6 9.18513 2.65173   4
   1 -17  -6 36.3149 4.73313   2
  -1 -17   6 29.8280 4.61300   2
  -1 -17   6 47.9685 5.14985   4
   1 -17  -6 28.2728 5.56666   4
   0 -17  -6 33.9988 4.60889   2
   0 -17  -6 27.9681 6.56615   4
   0 -17   6 32.4908 4.20062   2
  -1 -17  -6 6.83995 4.24566   4
   1 -17   6 0.72519 1.86192   2
   1 -17   6 0.13006 2.52218   4
  -1 -17  -6 3.19003 3.41567   2
  -2 -17  -6 3.44844 3.61099   2
   2 -17   6 7.74726 2.02749   2
  -2 -17  -6 -1.1687 4.44487   4
   2 -17   6 5.71131 3.01131   4
   3 -17   6 7.51415 2.25610   2
  -3 -17  -6 4.36449 4.87625   4
  -3 -17  -6 5.66812 4.04489   2
   3 -17   6 2.79620 2.81349   4
 -13   0   7 -1.6050 2.17546   3
 -12   0   7 1.55668 1.90258   3
 -11   0   7 0.89656 1.60624   3
 -10   0   7 0.66260 1.58916   3
  -9   0   7 -0.7032 1.46055   3
  -8   0   7 1.36484 1.51913   3
  -7   0   7 -0.2848 1.31775   3
  -6   0   7 0.69748 1.24418   3
  -5   0   7 0.99352 0.97707   3
  -4   0   7 -0.5300 0.86599   2
  -4   0   7 -0.1232 0.76802   3
   4   0  -7 -0.0685 0.75265   2
  -3   0   7 0.11917 0.60200   2
  -3   0   7 0.12920 0.57542   3
  -1   0   7 1.34896 0.85675   4
  -1   0   7 5.29397 1.17225   3
  -1   0   7 1.89167 0.43029   2
   0   0   7 2.10662 0.31160   2
   0   0   7 1.18786 0.56841   3
   0   0   7 0.00754 0.65007   4
   0   0  -7 0.49476 0.23447   2
   1   0   7 1.49328 0.29180   2
   1   0   7 0.63805 0.72178   4
   1   0   7 0.49226 0.25977   5
   1   0   7 1.09125 0.56498   3
   2   0   7 0.23706 0.27187   2
   2   0   7 0.44253 0.31482   5
  -2   0  -7 -0.0862 0.58822   4
   2   0   7 0.80731 0.83325   4
  -3   0  -7 -0.2045 0.84260   4
  -3   0  -7 0.33762 0.34028   5
  -4   0  -7 0.29379 0.35364   5
  -4   0  -7 1.10037 0.87511   4
  -5   0  -7 0.85716 1.07826   4
  -5   0  -7 -0.5811 0.41141   5
  -6   0  -7 -0.1792 0.56599   5
  -6   0  -7 0.50402 1.11913   4
  -7   0  -7 0.79436 1.30373   4
  -7   0  -7 0.00787 0.61831   5
  -8   0  -7 1.05507 0.85619   5
  -9   0  -7 0.60876 1.14323   5
 -10   0  -7 0.03805 1.04395   5
 -11   0  -7 -0.3147 1.10365   5
 -12   0  -7 -1.3732 1.23608   5
 -13   0  -7 0.54859 1.63132   5
 -13  -1   7 3.11804 2.36240   3
 -13   1   7 2.87641 2.48281   3
 -12  -1   7 2.87894 2.00859   3
 -12   1   7 5.11116 2.13523   3
 -11   1   7 13.0682 2.60300   3
 -10  -1   7 18.4945 2.84580   3
 -10   1   7 21.1737 3.02194   3
  -9  -1   7 18.1793 2.62231   3
  -9   1   7 13.0432 2.58912   3
  -8  -1   7 15.3653 2.01605   4
  -8  -1   7 17.8677 2.59377   3
  -8   1   7 17.5494 2.65051   3
  -7  -1   7 46.3748 4.23083   3
  -7  -1   7 38.6598 3.64749   4
  -7   1   7 42.7215 4.18848   3
  -6  -1   7 232.795 16.8884   3
  -6   1   7 219.257 16.8905   3
  -5  -1   7 5.41304 1.30002   2
  -5  -1   7 3.82144 1.32699   3
  -5   1   7 4.50064 1.29921   4
  -5   1   7 5.60038 1.52695   3
  -4  -1   7 0.85239 0.97692   3
  -4  -1   7 -0.3997 0.74381   2
   4  -1  -7 0.12036 0.76438   2
  -4   1   7 0.23625 0.96755   3
  -4   1   7 0.21763 0.89193   4
  -3  -1   7 81.9936 6.09769   3
  -3  -1   7 69.7477 5.66046   2
   3  -1  -7 64.4167 5.46378   2
   3   1  -7 79.0305 5.54028   2
  -3   1   7 71.3516 5.94229   4
  -3   1   7 84.5124 6.26656   3
   2  -1  -7 77.1075 5.35285   2
  -2  -1   7 75.3937 6.13953   3
  -2  -1   7 62.3912 5.48941   2
  -2   1   7 80.4511 6.09242   3
   2   1  -7 79.7289 5.42404   2
   2   1  -7 85.2775 6.62951   3
  -2   1   7 69.8848 5.45419   2
  -2   1   7 69.2279 5.90543   4
  -1  -1   7 824.348 56.3135   2
  -1  -1   7 800.406 56.9337   3
   1  -1  -7 826.165 56.9337   3
  -1   1   7 761.913 56.8176   4
   1   1  -7 805.224 56.2742   2
   0  -1   7 344.835 24.4199   3
   0  -1   7 291.515 24.2200   4
   0  -1   7 355.507 23.7758   2
   0  -1  -7 360.474 24.3620   3
   0  -1  -7 357.213 24.4746   4
   0   1   7 341.236 24.3745   4
   0   1  -7 310.432 23.7821   2
   0   1   7 347.855 24.3365   3
   1  -1   7 498.526 34.9274   2
   1  -1   7 511.178 34.9054   5
  -1  -1  -7 521.913 35.6073   4
   1  -1   7 449.466 35.3798   4
   1   1   7 500.317 35.4163   3
   1   1   7 485.795 34.8595   2
   1   1   7 516.572 35.6916   4
  -2  -1  -7 70.2703 5.72704   4
   2  -1   7 67.2179 4.82507   2
   2  -1   7 58.6827 5.22969   4
   2   1   7 70.6171 5.27296   3
   2   1   7 59.9470 4.84067   5
  -3  -1  -7 160.611 11.1701   5
  -3  -1  -7 150.153 11.7399   4
  -3   1  -7 153.214 11.1066   5
  -4  -1  -7 161.407 12.3993   4
  -4  -1  -7 173.263 11.8849   5
  -4   1  -7 155.994 11.8169   5
  -5  -1  -7 47.8007 4.30433   4
  -5  -1  -7 45.1242 3.71261   5
  -5   1  -7 43.1037 3.66100   5
  -5   1  -7 43.7207 4.32798   4
  -6  -1  -7 11.8232 1.77886   5
  -6  -1  -7 18.4079 2.48338   4
  -6   1  -7 14.0030 2.21812   4
  -6   1  -7 11.3817 1.75758   5
  -7  -1  -7 101.389 8.18746   5
  -7  -1  -7 111.428 8.73968   4
  -8  -1  -7 170.337 13.0590   5
  -8  -1  -7 177.391 13.4778   4
  -9  -1  -7 12.4265 2.11491   5
  -9  -1  -7 13.7034 2.70999   4
 -10  -1  -7 11.7821 2.34366   5
 -11  -1  -7 10.1059 2.11477   5
 -11   1  -7 7.11063 1.78558   5
 -12  -1  -7 11.2352 2.37627   5
 -12   1  -7 7.96118 2.16169   5
 -13  -1  -7 13.8647 2.74975   5
 -13   1  -7 9.60888 3.11185   5
 -13  -2   7 3.04144 2.03370   3
 -13   2   7 1.82671 2.56447   3
 -12  -2   7 22.7753 3.36031   3
 -12   2   7 27.1049 3.80994   3
 -11  -2   7 23.1773 3.03200   3
 -11   2   7 20.9359 3.37329   3
 -10  -2   7 111.242 8.78076   3
 -10   2   7 110.082 9.09990   3
  -9  -2   7 2.60608 1.60040   3
  -9   2   7 3.76191 1.95805   3
  -8  -2   7 157.853 12.3635   3
  -8   2   7 167.909 12.6267   3
  -7  -2   7 264.943 18.3134   3
  -7  -2   7 218.189 17.6948   4
  -7   2   7 258.508 18.3618   3
  -6  -2   7 56.4613 4.98720   2
  -6  -2   7 64.0083 5.18137   3
  -6  -2   7 49.8241 4.54967   4
  -6   2   7 60.1375 5.24743   3
  -5  -2   7 14.4095 2.19035   2
  -5  -2   7 11.5086 1.93304   3
  -5   2   7 13.2463 2.27612   3
  -5   2   7 11.9179 1.85444   4
  -4  -2   7 148.655 11.8623   2
   4  -2  -7 138.499 11.6337   2
  -4  -2   7 167.149 12.1443   3
  -4   2   7 166.249 12.0288   4
  -4   2   7 191.917 12.5362   3
   3  -2  -7 40.6851 3.58412   2
  -3  -2   7 46.1843 4.04310   2
  -3  -2   7 49.6088 4.11499   3
  -3   2   7 51.6346 4.39258   3
  -3   2   7 51.6850 4.12260   4
  -2  -2   7 12.5365 1.34646   2
  -2  -2   7 12.3395 1.85568   3
  -2   2   7 13.8542 1.87212   4
   2   2  -7 13.4431 1.23758   2
  -2   2   7 13.4069 1.84444   3
  -1  -2   7 12.8287 1.24386   2
   1  -2  -7 12.9648 1.69268   4
  -1   2   7 14.0969 1.81326   4
  -1   2   7 14.8666 1.82743   3
   1   2  -7 14.0439 1.22372   2
   0  -2  -7 150.224 11.2766   3
   0  -2  -7 148.775 11.3840   4
   0  -2   7 156.573 10.7738   2
   0   2  -7 146.081 10.8033   2
   0   2   7 150.162 11.3472   3
   0   2   7 156.785 11.5918   4
   1  -2   7 19.1514 1.69086   5
   1  -2   7 25.3703 1.84383   2
   1   2   7 27.4981 2.31987   3
  -1   2  -7 21.2175 1.82857   2
   2  -2   7 185.564 15.2621   4
  -2  -2  -7 222.339 15.4185   4
   2  -2   7 202.872 14.7858   2
   2   2   7 219.296 15.1876   3
  -3  -2  -7 104.183 8.00088   4
   3  -2   7 93.2158 7.38917   2
  -3   2  -7 97.0499 7.28726   5
   3   2   7 110.088 7.76854   3
  -4  -2  -7 128.713 9.52187   4
  -4  -2  -7 128.387 8.94076   5
  -4   2  -7 108.647 8.81338   5
  -5  -2  -7 6.02035 1.14711   5
  -5  -2  -7 8.57959 1.70156   4
  -6  -2  -7 42.5473 4.03579   4
  -6  -2  -7 35.5759 3.38995   5
  -7  -2  -7 24.4173 3.47696   4
  -7  -2  -7 21.7289 2.48930   5
  -8  -2  -7 41.1285 3.77272   5
  -8  -2  -7 36.0735 4.30660   4
  -9  -2  -7 156.572 11.9572   4
  -9  -2  -7 142.873 11.4953   5
 -10  -2  -7 10.7914 2.11555   5
 -10  -2  -7 9.26426 2.70001   4
 -11  -2  -7 78.1451 6.80940   5
 -12  -2  -7 55.4955 5.45178   5
 -13  -2  -7 16.1507 3.03205   5
 -13  -3   7 5.91013 3.62737   3
 -13   3   7 7.29903 2.80434   3
 -12  -3   7 9.47670 2.24865   3
 -12   3   7 7.03168 2.50095   3
 -11  -3   7 12.5639 2.18797   3
 -11   3   7 9.00656 2.53251   3
 -10  -3   7 13.4413 2.26007   3
 -10  -3   7 9.83821 1.98078   4
 -10   3   7 12.2358 2.44694   3
  -9  -3   7 49.5870 4.31548   4
  -9  -3   7 49.5378 4.46287   3
  -9   3   7 46.1802 4.75241   3
  -8  -3   7 35.6030 3.68419   4
  -8  -3   7 45.4524 3.98000   3
  -8   3   7 42.0392 4.21165   3
  -7  -3   7 76.3578 6.17837   3
  -7  -3   7 67.4318 5.72638   4
  -7  -3   7 68.8982 6.28156   2
  -7   3   7 76.4993 6.35405   3
  -6  -3   7 191.763 15.0922   2
  -6  -3   7 186.506 14.6763   4
  -6  -3   7 203.362 15.1011   3
  -6   3   7 230.229 15.4375   3
  -5  -3   7 14.5615 2.35004   2
  -5  -3   7 13.4420 2.08510   3
  -5   3   7 18.3967 2.43858   3
  -4  -3   7 1.48148 0.76687   3
  -4  -3   7 3.11995 1.04019   2
   4  -3  -7 1.16741 0.93250   2
  -4   3   7 0.92418 0.98297   3
  -4   3   7 0.89285 0.97962   4
   3  -3  -7 21.0388 2.02143   2
  -3  -3   7 22.8723 2.31658   2
  -3  -3   7 24.2282 2.38944   3
  -3   3   7 23.7063 2.53136   4
  -3   3   7 26.2513 2.80384   3
   2  -3  -7 25.0496 2.46011   4
  -2  -3   7 21.2705 2.06975   2
  -2  -3   7 21.0436 2.28778   3
  -2   3   7 26.4701 2.68957   3
  -2   3   7 24.3122 2.50574   4
  -1  -3   7 137.436 10.5886   3
   1  -3  -7 137.992 10.6909   4
  -1  -3   7 141.407 10.2106   2
  -1   3   7 139.194 10.8130   3
   1   3  -7 151.322 10.1903   2
   0  -3   7 104.820 7.75296   2
   0  -3  -7 106.470 8.31794   3
   0   3  -7 102.259 7.78732   2
   0   3   7 121.947 8.79885   3
  -1  -3  -7 1.85233 0.99975   4
  -1  -3  -7 2.92728 0.80997   3
   1   3   7 2.66582 0.90971   3
  -1   3  -7 3.03599 0.67258   2
  -2  -3  -7 232.189 16.5738   4
   2  -3   7 217.609 15.9753   2
  -2   3  -7 232.785 15.7790   5
   2   3   7 215.631 15.9746   2
   2   3   7 222.719 16.3234   3
  -3  -3  -7 288.066 19.9359   4
   3  -3   7 267.828 19.3455   2
   3   3   7 278.589 19.6284   3
  -3   3  -7 253.460 19.1691   5
  -4  -3  -7 55.0994 3.99532   5
   4  -3   7 45.0454 3.94809   2
  -4  -3  -7 47.2753 4.51809   4
   4   3   7 50.2728 4.19693   3
  -5  -3  -7 402.378 29.5842   4
  -5  -3  -7 419.952 29.1383   5
   5  -3   7 358.699 29.0922   2
   5   3   7 456.706 29.5484   3
  -6  -3  -7 182.397 13.1334   5
  -6  -3  -7 172.943 13.5582   4
  -7  -3  -7 341.495 24.6275   4
  -7  -3  -7 328.369 24.1843   5
  -8  -3  -7 39.5302 4.16967   4
  -8  -3  -7 30.0521 3.51615   5
  -9  -3  -7 10.4609 2.36563   4
  -9  -3  -7 4.20655 1.48529   5
 -10  -3  -7 2.42449 2.15426   4
 -10  -3  -7 3.18623 1.38254   5
 -11  -3  -7 54.9598 6.19953   4
 -11  -3  -7 57.6775 5.37114   5
 -12  -3  -7 21.5466 3.33338   5
 -13  -3  -7 8.22107 2.23076   5
 -13   4   7 17.1421 4.26599   3
 -12  -4   7 21.9849 3.52581   4
 -12   4   7 18.4127 3.60936   3
 -11  -4   7 0.83041 1.32969   3
 -11  -4   7 0.82116 1.52266   4
 -11   4   7 0.26987 1.82288   3
 -10  -4   7 8.46515 1.73533   3
 -10  -4   7 9.01006 1.91272   4
 -10   4   7 6.43346 2.19148   3
  -9  -4   7 10.8170 1.82551   4
  -9  -4   7 11.7256 1.93135   3
  -9   4   7 6.75355 2.05594   3
  -8  -4   7 47.1401 4.21999   4
  -8  -4   7 46.8285 4.33942   3
  -8   4   7 47.4176 4.88382   3
  -7  -4   7 31.6339 3.88218   2
  -7  -4   7 32.7171 3.40494   4
  -7  -4   7 42.1920 3.72300   3
  -7   4   7 38.2973 4.00825   3
  -6  -4   7 96.8231 8.31704   2
  -6  -4   7 97.2227 7.88450   4
  -6  -4   7 106.446 8.23190   3
  -6   4   7 114.866 8.59871   3
  -5  -4   7 150.914 12.1496   2
  -5  -4   7 139.788 11.8092   4
  -5  -4   7 169.972 12.2054   3
  -5   4   7 190.588 12.6202   3
  -4  -4   7 146.416 12.3691   2
  -4  -4   7 170.128 12.5075   3
  -4   4   7 175.636 12.3933   4
  -4   4   7 177.958 12.9165   3
  -3  -4   7 92.7463 6.86052   3
  -3  -4   7 77.8617 6.65850   2
   3  -4  -7 86.2221 6.83819   4
  -3   4   7 83.7909 7.13415   3
  -3   4   7 93.8108 6.84410   4
  -2  -4   7 76.9632 5.78066   2
  -2  -4   7 75.4146 6.03430   3
   2  -4  -7 75.7512 6.12891   4
  -2   4   7 76.1535 6.39253   3
   1  -4  -7 128.780 10.3079   4
  -1  -4   7 134.729 9.67021   2
  -1   4   7 137.487 10.3563   3
   0  -4   7 105.595 7.66349   2
   0  -4  -7 105.743 8.22912   4
   0   4   7 105.573 8.28301   3
   1  -4   7 3.44050 0.64058   2
  -1  -4  -7 5.19641 1.14257   3
  -1  -4  -7 2.68674 1.08810   4
   1   4   7 2.96296 1.00178   3
   2  -4   7 129.899 9.54286   2
  -2  -4  -7 134.833 10.1436   4
   2   4   7 115.014 9.44041   2
   2   4   7 149.983 9.99520   3
  -3  -4  -7 79.9321 6.54717   4
   3  -4   7 81.6269 5.99625   2
   3   4   7 71.3876 6.00828   2
   3   4   7 84.1522 6.26267   3
  -4  -4  -7 261.210 19.7890   4
   4  -4   7 271.999 19.3452   2
   4   4   7 273.764 19.4767   3
   5  -4   7 196.992 14.7427   2
  -5  -4  -7 211.709 14.7294   5
  -5  -4  -7 191.213 15.1838   4
   5   4   7 207.144 14.8369   3
   6  -4   7 18.0227 2.30179   2
  -6  -4  -7 24.1510 3.05243   4
  -6  -4  -7 22.2241 2.26321   5
   6   4   7 22.0560 2.39049   3
  -7  -4  -7 119.895 8.76013   5
  -7  -4  -7 105.030 9.17812   4
  -8  -4  -7 138.040 11.5366   4
  -8  -4  -7 142.062 11.0544   5
   8   4   7 153.035 11.1190   3
  -9  -4  -7 4.48980 1.43387   5
  -9  -4  -7 6.24605 2.41211   4
 -10  -4  -7 49.2947 4.73747   5
 -10  -4  -7 51.9802 5.56948   4
 -11  -4  -7 27.1707 3.42739   5
 -11  -4  -7 24.2798 4.39459   4
 -12  -4  -7 38.1828 5.64502   4
 -12  -4  -7 36.2677 4.67440   5
 -13  -4  -7 22.6493 3.61010   5
 -13   5   7 10.8816 3.40277   3
 -12  -5   7 51.4981 4.94780   4
 -12   5   7 40.0796 5.32519   3
 -11  -5   7 9.71116 2.29501   4
 -11   5   7 8.90484 2.59971   3
 -10   5   7 32.1102 3.90765   3
  -9  -5   7 9.21894 1.74620   3
  -9  -5   7 9.50792 2.06824   4
  -9   5   7 9.03513 2.23453   3
  -8  -5   7 97.8640 7.60434   4
  -8  -5   7 96.1695 7.58456   3
  -8  -5   7 85.9143 8.20038   2
  -8   5   7 102.849 8.17816   3
  -7  -5   7 126.949 10.2020   3
  -7  -5   7 134.392 10.0718   4
  -7  -5   7 122.485 10.6607   2
  -7   5   7 149.486 10.7630   3
  -6  -5   7 41.9035 4.52612   2
  -6  -5   7 45.3755 4.05572   4
  -6  -5   7 45.8258 4.25570   3
  -6   5   7 55.8756 4.68749   3
  -5  -5   7 172.918 12.1989   3
  -5  -5   7 157.094 12.2760   2
  -5  -5   7 154.846 11.9286   4
  -4  -5   7 0.14797 0.90862   2
  -4  -5   7 1.28121 0.79175   3
  -4  -5   7 1.00478 0.88989   4
  -4   5   7 -0.1041 1.11772   3
  -3  -5   7 192.364 13.9354   3
  -3  -5   7 181.676 13.7963   2
   3  -5  -7 175.332 13.3232   2
  -3   5   7 209.988 14.4320   3
  -2  -5   7 55.9135 4.57531   3
   2  -5  -7 51.0130 4.63736   4
  -2  -5   7 55.4694 4.34398   2
  -2   5   7 55.8973 5.02783   3
  -1  -5   7 52.6181 4.13054   2
   1  -5  -7 55.3429 4.64196   4
  -1   5   7 52.7589 4.82754   3
   0  -5   7 48.6238 3.83099   2
   0  -5  -7 49.3527 4.40803   4
   0   5   7 52.6643 4.55763   3
   1  -5   7 182.320 13.4465   2
  -1  -5  -7 177.755 13.9990   4
   1   5   7 204.132 14.0759   3
  -2  -5  -7 17.3334 1.92533   3
  -2  -5  -7 16.2319 2.20216   4
   2  -5   7 15.2795 1.51915   2
   2   5   7 13.8490 1.44565   2
   2   5   7 15.7026 2.00687   3
   3  -5   7 35.1443 2.95628   2
  -3  -5  -7 32.5151 3.52288   4
   3   5   7 35.9218 3.23793   3
   4  -5   7 225.909 16.3959   2
  -4  -5  -7 221.931 16.8814   4
   4   5   7 231.626 16.5286   3
   5  -5   7 154.959 11.5205   2
  -5  -5  -7 138.508 11.8957   4
  -5  -5  -7 175.172 11.5368   5
   5   5   7 150.478 11.4568   3
  -6  -5  -7 72.9477 6.61309   4
  -6  -5  -7 84.4075 6.13775   5
   6  -5   7 71.2152 6.10255   2
  -7  -5  -7 16.8530 2.03355   5
  -7  -5  -7 11.9676 2.61181   4
   7  -5   7 14.4564 2.51785   2
  -8  -5  -7 132.974 11.5260   4
   8  -5   7 146.256 11.1473   2
  -8  -5  -7 151.653 11.0814   5
  -9  -5  -7 20.2775 3.63554   4
   9  -5   7 18.5151 2.88178   2
  -9  -5  -7 20.0470 2.60853   5
 -10  -5  -7 40.8720 5.21709   4
  10  -5   7 40.1162 4.32520   2
 -10  -5  -7 42.1503 4.12985   5
  11  -5   7 22.1241 3.50472   2
 -11  -5  -7 20.8517 2.94995   5
 -11  -5  -7 22.5063 4.01830   4
 -12  -5  -7 3.38411 1.57886   5
  12  -5   7 1.20508 1.87322   2
 -12  -5  -7 7.48993 3.21239   4
 -12  -6   7 17.2567 3.03981   4
 -12   6   7 18.6182 5.51660   3
 -11  -6   7 23.8607 3.42643   4
 -11   6   7 21.3398 3.47721   3
 -10  -6   7 8.61269 2.10498   4
 -10   6   7 8.94202 2.26112   3
  -9  -6   7 6.75966 1.91271   4
  -9   6   7 7.72774 2.11458   3
  -8  -6   7 3.40701 2.24064   2
  -8  -6   7 2.51042 1.39449   3
  -8  -6   7 5.21047 1.53687   4
  -8   6   7 4.85377 1.84841   3
  -7  -6   7 81.2406 6.18391   4
  -7  -6   7 63.8621 6.09115   3
  -7  -6   7 72.9177 6.71725   2
  -7   6   7 84.2898 6.73527   3
  -6  -6   7 23.6813 2.60424   4
  -6  -6   7 21.1338 2.73199   3
  -6  -6   7 21.3469 3.05890   2
  -6   6   7 27.4161 3.11704   3
  -5  -6   7 14.0790 2.37079   2
  -5  -6   7 14.2820 1.93084   3
  -5  -6   7 13.7504 2.02227   4
   5  -6  -7 13.8945 1.47223   2
  -5   6   7 16.6438 2.40372   3
   4  -6  -7 280.047 20.0342   2
  -4  -6   7 292.300 20.5713   3
  -4  -6   7 279.121 20.4130   4
  -4  -6   7 275.820 20.6287   2
  -4   6   7 288.554 20.9449   3
   3  -6  -7 55.4470 4.21375   2
  -3  -6   7 58.0787 4.80993   3
  -3  -6   7 55.2445 4.72972   4
   3  -6  -7 63.4915 4.94041   4
  -3  -6   7 52.9999 4.31979   5
  -3  -6   7 58.4545 4.78947   2
  -3   6   7 65.6787 5.39301   3
  -2  -6   7 30.5572 2.83135   2
   2  -6  -7 35.0711 3.26342   4
  -2  -6   7 31.5081 2.43285   5
  -2   6   7 31.6979 3.36579   3
  -1  -6   7 163.788 11.6762   2
   1  -6  -7 156.556 12.1313   4
  -1   6   7 162.033 12.3184   3
   0  -6   7 59.0931 4.39569   2
   0  -6  -7 55.9722 4.98648   4
   0   6   7 54.7790 5.01099   3
   1  -6   7 161.236 11.3264   2
  -1  -6  -7 142.674 11.2234   2
  -1  -6  -7 163.087 11.9565   4
   1   6   7 161.526 11.9018   3
  -2  -6  -7 37.0301 3.32781   3
   2  -6   7 37.0538 3.03596   2
  -2  -6  -7 33.8777 3.63320   4
  -2  -6  -7 30.4520 3.01988   2
   2   6   7 39.3838 2.87411   2
   2   6   7 47.1513 4.67742   3
  -3  -6  -7 159.888 12.3214   4
   3  -6   7 151.444 11.7448   2
   3   6   7 172.937 12.1314   3
  -4  -6  -7 127.582 10.2722   4
   4  -6   7 126.120 9.75574   2
   4   6   7 139.702 9.96781   3
   5  -6   7 268.749 18.8898   2
  -5  -6  -7 250.982 19.3260   4
  -6  -6  -7 74.1891 5.73702   5
   6  -6   7 70.4811 5.77298   2
  -6  -6  -7 65.7071 6.27649   4
   7  -6   7 63.8634 5.49548   2
  -7  -6  -7 63.5627 6.04795   4
  -7  -6  -7 64.5004 5.39603   5
   8  -6   7 2.64628 1.54801   2
  -8  -6  -7 5.89702 1.41127   5
  -9  -6  -7 70.2158 5.92019   5
   9  -6   7 71.7829 6.12708   2
  -9  -6  -7 62.4655 6.76078   4
  10  -6   7 10.1320 2.24329   2
 -10  -6  -7 9.29816 3.19199   4
 -10  -6  -7 8.87379 1.98338   5
 -11  -6  -7 21.3795 2.96911   5
  11  -6   7 23.8299 3.50331   2
 -11  -6  -7 17.0270 4.00567   4
  12  -6   7 7.09289 2.41034   2
 -12  -6  -7 7.14832 2.06205   5
 -12  -6  -7 2.74780 3.45051   4
 -12  -7   7 19.8551 3.41798   4
 -12   7   7 23.3204 4.10994   3
 -11  -7   7 25.4464 3.61706   4
 -11   7   7 14.8781 3.16440   3
 -10  -7   7 8.14056 2.26665   4
 -10   7   7 3.48089 2.08771   3
  -9  -7   7 23.4648 3.13766   4
  -9  -7   7 21.9459 3.84379   2
  -9   7   7 24.5044 3.38506   3
  -8  -7   7 7.26458 1.62683   4
  -8  -7   7 3.25546 2.23878   2
  -8   7   7 3.34841 1.74736   3
  -7  -7   7 -1.5114 1.68694   2
  -7  -7   7 1.59771 1.25989   4
   7  -7  -7 -0.4529 0.71322   2
  -7   7   7 1.33478 1.25159   3
  -6  -7   7 202.217 13.9570   4
  -6  -7   7 168.424 13.8761   3
  -6  -7   7 214.837 15.7838   2
  -6  -7   7 166.411 13.7168   5
   6  -7  -7 185.827 13.5877   2
  -6   7   7 207.249 14.6026   3
  -5  -7   7 10.2614 1.48785   5
   5  -7  -7 13.1225 1.40198   2
  -5  -7   7 12.7744 2.38022   2
  -5  -7   7 14.2816 2.04801   4
  -5  -7   7 14.3490 1.95974   3
  -5   7   7 13.3835 2.28440   3
  -4  -7   7 84.7457 6.62509   3
   4  -7  -7 87.0829 6.69661   4
   4  -7  -7 80.4699 6.07646   2
  -4  -7   7 82.7185 6.54982   4
  -4  -7   7 73.3613 6.17173   5
  -4  -7   7 81.4632 6.82628   2
  -4   7   7 95.9460 7.20299   3
   3  -7  -7 68.1046 5.05688   2
  -3  -7   7 68.2976 5.60247   4
  -3  -7   7 71.4334 5.15529   5
  -3  -7   7 66.4242 5.64037   3
   3  -7  -7 67.4278 5.76767   4
  -3  -7   7 67.3621 5.65794   2
  -3   7   7 77.9139 6.17506   3
   2  -7  -7 98.7760 6.49460   2
  -2  -7   7 91.2342 6.94930   2
   2  -7  -7 90.7541 7.29413   4
  -2  -7   7 83.9385 6.96986   4
  -2   7   7 82.7196 7.36802   3
  -1  -7   7 24.3012 2.17913   2
   1  -7  -7 22.6000 2.78547   4
  -1  -7   7 21.7037 2.38337   4
  -1   7   7 21.0382 2.72164   3
   0  -7  -7 70.9832 5.85383   4
   0  -7   7 66.8887 5.16027   2
   0   7   7 64.9120 5.76099   3
   1  -7   7 15.1323 1.51301   2
  -1  -7  -7 12.2357 2.08659   4
  -1  -7  -7 12.7954 1.60737   2
   1   7   7 14.0455 2.16842   3
  -2  -7  -7 42.9589 4.17280   4
   2  -7   7 47.1013 3.57612   2
  -2  -7  -7 40.0708 3.62267   2
   2   7   7 44.5098 3.34690   2
   2   7   7 42.4960 4.06290   3
  -3  -7  -7 15.2339 2.45112   4
   3  -7   7 13.6495 1.64966   2
  -3  -7  -7 15.7917 2.07721   2
   3   7   7 14.6614 2.24084   3
  -4  -7  -7 31.3693 3.60029   4
   4  -7   7 32.2295 2.91979   2
   4   7   7 30.4719 3.10628   3
   5  -7   7 22.4077 2.43938   2
  -5  -7  -7 23.8422 3.24508   4
   6  -7   7 95.2991 7.57751   2
  -6  -7  -7 96.5677 8.20112   4
  -7  -7  -7 14.5354 4.49760   4
   7  -7   7 17.2151 2.37115   2
   8  -7   7 24.4876 3.09775   2
  -8  -7  -7 27.9602 4.13476   4
  -8  -7  -7 25.6114 2.87383   5
   9  -7   7 15.3743 2.61617   2
  -9  -7  -7 11.0467 3.22081   4
  -9  -7  -7 14.3652 2.31573   5
 -10  -7  -7 40.5950 4.02179   5
 -10  -7  -7 36.2576 5.25115   4
  10  -7   7 33.4618 3.95275   2
 -11  -7  -7 5.41019 3.45603   4
 -11  -7  -7 6.80571 1.92322   5
  11  -7   7 8.71099 3.23335   2
 -12  -7  -7 29.0266 3.59007   5
 -12  -7  -7 15.8901 4.83407   4
  12  -7   7 29.4775 3.98789   2
  12  -8  -7 6.47732 2.14963   2
 -12  -8   7 7.56146 2.56637   4
 -12  -8   7 8.31529 2.27070   5
 -12   8   7 2.40748 2.76124   3
 -11  -8   7 15.4153 2.63365   5
  11  -8  -7 12.0079 2.29921   2
 -11  -8   7 13.7434 2.80154   4
 -11   8   7 9.55510 3.24017   3
  10  -8  -7 9.20952 1.87332   2
 -10  -8   7 9.59328 2.05962   5
 -10  -8   7 9.73059 2.34934   4
 -10   8   7 9.10935 2.61586   3
   9  -8  -7 12.1368 1.99196   2
  -9  -8   7 5.32179 2.67859   2
  -9  -8   7 13.7271 2.50148   4
  -9  -8   7 11.1582 2.01411   5
  -9   8   7 9.07218 2.49346   3
  -8  -8   7 24.6794 4.09824   2
   8  -8  -7 29.3299 2.83286   2
  -8  -8   7 28.5650 3.31338   4
  -8   8   7 26.6076 3.38821   3
   7  -8  -7 21.8556 2.17531   2
  -7  -8   7 19.2859 2.29135   5
  -7  -8   7 16.3488 3.30566   2
  -7  -8   7 27.3290 2.83308   4
  -7   8   7 16.4180 2.87038   3
  -6  -8   7 127.831 10.6300   3
  -6  -8   7 118.594 10.1195   2
   6  -8  -7 123.583 9.14087   2
  -6  -8   7 117.450 9.28969   5
  -6   8   7 135.397 10.1767   3
  -5  -8   7 29.3297 3.03364   4
  -5  -8   7 28.4096 2.55334   5
   5  -8  -7 30.5243 2.41624   2
  -5  -8   7 23.3216 2.80355   3
  -4  -8   7 106.665 8.23577   4
   4  -8  -7 101.431 8.31695   4
  -4  -8   7 106.708 8.23798   3
  -4  -8   7 106.875 7.81661   5
  -4  -8   7 92.6313 8.38219   2
  -4   8   7 124.372 8.85609   3
  -3  -8   7 130.098 8.55081   5
   3  -8  -7 114.280 9.18839   4
  -3  -8   7 102.145 9.00274   2
  -3  -8   7 119.130 9.07919   3
  -3  -8   7 113.930 8.98632   4
  -3   8   7 125.350 9.54630   3
  -2  -8   7 74.3907 6.25795   4
   2  -8  -7 71.0835 6.54071   4
  -2  -8   7 80.2717 6.23274   2
   2  -8  -7 83.4869 5.74182   2
  -2   8   7 82.3800 6.73172   3
  -1  -8   7 20.1418 2.44219   4
   1  -8  -7 18.9764 2.82489   4
   1  -8  -7 23.6353 1.99940   2
  -1  -8   7 24.0050 2.25903   2
  -1   8   7 23.4777 2.88025   3
   0  -8  -7 22.1581 3.01359   4
   0  -8  -7 23.5605 2.20372   2
   0  -8   7 22.3716 2.53418   4
   0  -8   7 26.7531 2.25125   2
   0   8   7 21.1376 1.93420   2
   0   8   7 23.7542 2.79780   3
   1  -8   7 4.84984 1.06965   2
   1  -8   7 7.17412 1.60568   4
  -1  -8  -7 6.72846 1.65799   4
  -1  -8  -7 6.61825 1.25745   2
   1   8   7 6.93981 0.89226   2
   1   8   7 5.85138 1.60302   3
  -2  -8  -7 39.0319 3.72482   2
  -2  -8  -7 48.6903 4.42858   4
   2  -8   7 42.0821 3.88418   4
   2  -8   7 46.7494 3.64544   2
   2   8   7 41.3807 4.02881   3
  -3  -8  -7 25.7767 3.19940   4
  -3  -8  -7 27.5118 2.78414   2
   3  -8   7 25.5578 2.41930   2
  -3  -8  -7 25.8767 2.66958   3
   3  -8   7 22.2205 2.67341   4
   3   8   7 20.9324 2.87867   3
  -4  -8  -7 123.709 10.2833   4
   4  -8   7 121.107 9.66019   4
   4  -8   7 141.091 9.73413   2
  -5  -8  -7 67.6097 6.31492   4
   5  -8   7 68.3327 5.69468   2
  -6  -8  -7 12.4978 2.72653   4
   6  -8   7 10.4917 1.95145   2
   7  -8   7 40.0750 3.94447   2
  -7  -8  -7 40.1065 4.85548   4
  -8  -8  -7 15.6320 3.37378   4
   8  -8   7 14.5039 2.41535   2
   9  -8   7 8.71982 2.07060   2
  -9  -8  -7 5.15245 1.61328   5
  -9  -8  -7 6.55900 3.00823   4
 -10  -8  -7 4.87947 3.46097   4
  10  -8   7 4.32874 1.94717   2
 -10  -8  -7 5.79737 1.60382   5
 -11  -8  -7 21.1415 4.71417   4
 -11  -8  -7 17.5858 2.95492   5
  11  -8   7 11.3093 2.84779   2
  11  -9  -7 16.5825 2.68386   2
 -11  -9   7 14.2094 2.57962   5
 -11  -9   7 17.2815 3.33325   4
 -11   9   7 12.7107 3.38723   3
  10  -9  -7 49.2843 4.45175   2
 -10  -9   7 47.4258 4.58649   5
 -10  -9   7 45.5619 4.79874   4
 -10   9   7 40.5844 5.22198   3
   9  -9  -7 42.8018 3.84510   2
  -9  -9   7 39.0287 3.96847   5
  -9  -9   7 42.6507 4.42029   4
  -9   9   7 37.6984 4.63651   3
  -8  -9   7 22.3538 2.56881   5
   8  -9  -7 25.3582 3.27257   2
  -8  -9   7 13.2489 3.27729   2
  -8  -9   7 19.8929 2.95359   4
  -8   9   7 18.0733 3.03705   3
  -7  -9   7 19.8846 2.28556   5
  -7  -9   7 17.1372 3.22891   2
   7  -9  -7 16.9145 2.10958   2
  -7  -9   7 23.9819 2.76887   4
  -7   9   7 22.2845 3.08909   3
  -6  -9   7 11.8186 1.63983   5
  -6  -9   7 13.2939 2.15741   4
  -6  -9   7 9.24345 2.48371   2
   6  -9  -7 11.5730 1.52467   2
  -6   9   7 10.0854 2.24285   3
  -5  -9   7 220.270 15.9203   4
  -5  -9   7 234.999 15.5687   5
  -5  -9   7 197.191 16.2340   2
  -5  -9   7 195.368 15.7745   3
   5  -9  -7 208.065 15.4021   2
  -5   9   7 237.146 16.4956   3
  -4  -9   7 8.42680 1.09727   5
   4  -9  -7 8.15531 1.04343   2
  -4  -9   7 4.39898 1.54636   4
  -4  -9   7 7.11734 1.94195   2
   4  -9  -7 8.54619 1.67800   4
  -4  -9   7 8.63954 1.67863   3
  -4   9   7 6.29454 1.88149   3
  -3  -9   7 28.7957 3.22229   4
   3  -9  -7 30.8154 2.50026   2
  -3  -9   7 34.5348 3.17646   3
  -3  -9   7 24.7215 3.21299   2
   3  -9  -7 32.5651 3.59074   4
  -3   9   7 35.3894 3.59993   3
  -2  -9   7 120.592 9.29654   4
  -2  -9   7 118.070 9.25141   2
   2  -9  -7 125.272 9.68110   4
   2  -9  -7 129.815 8.80973   2
  -2   9   7 111.535 9.57195   3
   1  -9  -7 13.1139 2.32041   4
  -1  -9   7 11.3406 1.91181   4
  -1  -9   7 14.0913 1.85905   2
  -1   9   7 9.79708 2.16164   3
   0  -9  -7 42.5602 3.98416   4
   0  -9   7 41.2636 3.54411   4
   0  -9   7 38.1257 3.20983   2
   0   9   7 29.9866 3.02903   2
   0   9   7 32.6248 3.61466   3
  -1  -9  -7 6.44681 1.51119   2
  -1  -9  -7 6.78013 1.92907   4
   1  -9   7 8.74249 1.72620   4
   1  -9   7 7.68601 1.29079   2
   1   9   7 9.12621 1.82797   3
  -2  -9  -7 56.7790 4.96110   2
   2  -9   7 62.3433 4.80097   2
  -2  -9  -7 53.5787 5.43162   4
   2  -9   7 62.9674 5.04422   4
   2   9   7 59.4032 5.03931   3
  -3  -9  -7 218.691 16.5017   4
   3  -9   7 238.010 15.9362   4
  -3  -9  -7 201.325 15.9066   2
  -3  -9  -7 223.741 16.9178   3
   3  -9   7 231.350 15.8562   2
   3   9   7 191.741 15.8030   3
   4  -9   7 24.0044 2.63587   2
  -4  -9  -7 28.7735 3.26787   2
  -4  -9  -7 24.1692 3.95168   4
   4  -9   7 28.0609 2.91153   4
   5  -9   7 145.966 11.0585   2
  -5  -9  -7 147.423 11.7506   4
  -6  -9  -7 10.2509 2.78612   4
   6  -9   7 8.86953 1.81348   2
   7  -9   7 77.0200 6.40122   2
  -7  -9  -7 73.7762 7.33875   4
  -8  -9  -7 37.6519 5.36135   4
   8  -9   7 38.6675 3.98169   2
   9  -9   7 2.98917 1.60287   2
  -9  -9  -7 8.05188 3.23443   4
 -10  -9  -7 0.47553 3.26801   4
  11  -9   7 7.26709 2.15827   2
 -11  -9  -7 2.74653 3.91554   4
 -11 -10   7 19.3869 3.08563   5
  11 -10  -7 22.2399 3.14344   2
 -10 -10   7 22.9200 4.64863   2
  10 -10  -7 31.2295 3.50697   2
 -10 -10   7 35.4812 4.32439   4
 -10 -10   7 34.8025 3.69178   5
 -10  10   7 30.3114 4.52099   3
  -9 -10   7 34.5160 3.48844   5
  -9 -10   7 20.5085 4.25698   2
   9 -10  -7 38.1295 3.45906   2
  -9 -10   7 33.7000 4.06664   4
  -9  10   7 32.0110 4.27699   3
  -8 -10   7 23.5088 2.66295   5
   8 -10  -7 28.4170 2.66438   2
  -8 -10   7 21.3102 3.24852   4
  -8 -10   7 22.1098 3.80529   2
  -8  10   7 18.8309 3.27655   3
  -7 -10   7 8.20138 2.72974   2
  -7 -10   7 8.07166 1.41188   5
  -7 -10   7 8.05421 1.93532   4
   7 -10  -7 6.16355 1.28450   2
  -7  10   7 5.54728 1.93381   3
  -6 -10   7 11.0672 1.49820   5
  -6 -10   7 12.4208 2.04933   4
  -6 -10   7 7.60168 2.57973   2
   6 -10  -7 8.98344 1.40342   2
  -6  10   7 9.62924 2.34106   3
  -5 -10   7 37.5206 4.35616   2
  -5 -10   7 35.9124 3.71216   3
  -5 -10   7 47.3023 3.40499   5
  -5 -10   7 41.5444 3.93678   4
   5 -10  -7 36.8365 3.20988   2
  -5  10   7 40.2337 4.34741   3
  -4 -10   7 160.316 12.0033   3
  -4 -10   7 149.280 12.3192   2
   4 -10  -7 159.452 11.4571   2
  -4 -10   7 165.715 12.0605   4
   4 -10  -7 155.001 12.2215   4
  -4  10   7 165.815 12.5349   3
   3 -10  -7 31.4379 2.27171   2
  -3 -10   7 20.5310 3.11047   2
  -3 -10   7 21.5646 3.50044   4
   3 -10  -7 25.7448 3.45229   4
  -3  10   7 20.1271 3.23220   3
  -2 -10   7 36.5592 3.67851   2
   2 -10  -7 40.5375 4.26556   4
   2 -10  -7 40.9275 3.11961   2
  -2 -10   7 38.9988 3.75318   4
  -2  10   7 30.6332 3.87641   3
   1 -10  -7 56.6419 4.49987   2
   1 -10  -7 57.7290 5.51862   4
  -1 -10   7 57.9914 4.95833   4
  -1  10   7 54.3183 5.14371   3
   0 -10  -7 143.211 11.1870   2
   0 -10  -7 154.897 11.9726   4
   0 -10   7 148.906 11.4440   4
   0  10   7 162.296 11.7466   3
  -1 -10  -7 17.1522 2.52091   2
   1 -10   7 25.7429 2.70935   4
  -1 -10  -7 21.9620 3.22904   4
   1  10   7 17.6942 2.65367   3
   2 -10   7 0.49932 0.89458   2
  -2 -10  -7 3.77492 1.72196   4
   2 -10   7 0.87234 1.25825   4
  -2 -10  -7 -0.2536 1.31472   2
   2  10   7 0.94472 1.46376   3
   3 -10   7 260.805 18.5000   4
  -3 -10  -7 236.078 18.5857   2
  -3 -10  -7 269.447 19.5576   4
   3 -10   7 271.430 18.4490   2
   3  10   7 235.597 18.3455   3
  -4 -10  -7 24.5058 3.30368   2
   4 -10   7 21.4881 2.52822   2
   4 -10   7 25.6942 2.83637   4
  -4 -10  -7 24.4306 3.58770   4
   5 -10   7 55.6652 4.68425   2
  -5 -10  -7 51.7164 5.70274   4
  -6 -10  -7 21.2677 3.65835   4
   6 -10   7 19.7683 2.44813   2
   7 -10   7 17.2390 2.59346   2
  -7 -10  -7 20.5631 4.00201   4
   8 -10   7 6.31864 1.69477   2
  -8 -10  -7 8.95904 3.27596   4
   9 -10   7 13.4490 2.55437   2
  -9 -10  -7 19.1117 4.15680   4
  10 -10   7 27.9921 3.65377   2
 -10 -10  -7 29.5193 5.28270   4
 -10 -11   7 28.5712 3.15038   5
 -10 -11   7 27.1729 5.34118   4
  10 -11  -7 30.1115 3.28743   2
 -10  11   7 16.6591 3.81810   3
  -9 -11   7 3.69636 2.06297   4
  -9 -11   7 1.45973 3.01397   2
   9 -11  -7 3.82201 1.47186   2
  -9 -11   7 2.19194 1.22688   5
  -9  11   7 1.69990 2.26058   3
   8 -11  -7 6.91525 1.46629   2
  -8 -11   7 9.64046 1.70226   5
  -8 -11   7 6.75593 2.84208   2
  -8 -11   7 6.01242 2.06775   4
  -8  11   7 7.84946 2.43300   3
   7 -11  -7 36.7382 3.67264   2
  -7 -11   7 46.5251 3.79403   5
  -7 -11   7 24.6652 4.49235   2
  -7 -11   7 36.8371 4.02122   4
  -7  11   7 46.3572 4.68367   3
  -6 -11   7 4.78600 2.40295   2
   6 -11  -7 9.26455 1.34315   2
  -6 -11   7 9.64413 1.92866   4
  -6  11   7 6.12969 2.25922   3
   5 -11  -7 8.10895 1.30843   2
  -5 -11   7 10.6673 1.93834   4
  -5 -11   7 7.39245 2.22145   2
  -5  11   7 7.22451 2.11657   3
  -4 -11   7 2.91871 1.91273   2
   4 -11  -7 3.79969 1.82893   4
  -4 -11   7 3.06360 1.41089   4
  -4 -11   7 0.75116 1.08732   3
   4 -11  -7 3.56150 0.90380   2
  -4  11   7 0.50792 1.52707   3
   3 -11  -7 11.7913 2.46524   4
  -3 -11   7 9.58398 2.23468   2
   3 -11  -7 10.7355 1.32717   2
  -3 -11   7 7.31267 1.76735   4
  -3  11   7 8.24873 2.16898   3
  -2 -11   7 61.7419 5.48968   2
   2 -11  -7 68.6765 4.90156   2
   2 -11  -7 61.5539 6.02024   4
  -2 -11   7 61.5523 5.41271   4
  -2  11   7 58.8730 5.66495   3
  -1 -11   7 7.88992 2.67609   4
   1 -11  -7 9.70553 1.51819   2
  -1 -11   7 10.3252 1.89007   2
   1 -11  -7 7.30450 2.28383   4
  -1  11   7 6.65753 2.12901   3
   0 -11   7 78.8387 6.23250   2
   0 -11  -7 75.5625 6.98735   4
   0 -11   7 80.5114 6.41385   4
   0 -11  -7 71.2177 6.18720   2
   0  11   7 82.9461 6.64981   3
  -1 -11  -7 40.1635 4.14169   2
   1 -11   7 45.7870 4.23065   4
   1 -11   7 49.5460 3.93383   2
   1  11   7 41.4024 4.13755   3
  -2 -11  -7 80.8758 7.03013   4
   2 -11   7 77.2070 6.02497   2
   2 -11   7 80.4529 6.31278   4
  -2 -11  -7 72.1054 6.39304   2
   2  11   7 69.4919 6.11945   3
  -3 -11  -7 90.0149 7.52322   4
   3 -11   7 87.7957 6.54816   4
   3 -11   7 84.2876 6.37851   2
  -3 -11  -7 73.2664 6.79072   2
   3  11   7 68.3729 6.22772   3
  -4 -11  -7 25.9276 3.55301   2
   4 -11   7 27.5507 3.00371   4
  -4 -11  -7 17.6877 3.49955   4
   4 -11   7 24.9388 2.68432   2
  -5 -11  -7 21.9065 3.64210   4
  -5 -11  -7 24.3453 3.41529   2
   5 -11   7 19.9820 2.51633   2
   6 -11   7 2.74573 1.12300   2
  -6 -11  -7 3.07181 2.64975   4
  -7 -11  -7 32.3470 4.93416   4
   7 -11   7 34.6869 3.60465   2
  -8 -11  -7 8.37856 3.90873   4
   8 -11   7 3.45658 1.70770   2
   9 -11   7 8.88482 2.28853   2
  -9 -11  -7 14.7880 4.29214   4
 -10 -11  -7 6.52242 4.42692   4
  10 -11   7 7.83843 2.22282   2
  -9 -12   7 18.0061 4.37080   2
  -9 -12   7 33.3959 3.29074   5
   9 -12  -7 29.4826 3.21583   2
  -9 -12   7 34.3400 4.47840   4
  -9  12   7 22.7222 4.30950   3
  -8 -12   7 7.58072 5.04577   2
   8 -12  -7 12.1596 1.92275   2
  -8 -12   7 12.6026 2.55821   4
  -8  12   7 8.31962 5.03992   3
   7 -12  -7 19.2473 2.19740   2
  -7 -12   7 19.0860 2.96968   4
  -7 -12   7 12.3925 3.39935   2
  -7  12   7 14.3400 2.94031   3
  -6 -12   7 25.5377 3.12133   4
   6 -12  -7 24.6946 2.33213   2
  -6 -12   7 14.0531 3.19911   2
  -6  12   7 24.2278 3.58912   3
  -5 -12   7 29.5604 4.16494   2
  -5 -12   7 32.4329 3.65289   4
   5 -12  -7 34.2275 2.92407   2
  -5  12   7 33.8030 4.06755   3
   4 -12  -7 19.1780 1.88715   2
  -4 -12   7 13.3757 2.41258   4
   4 -12  -7 13.2096 2.88436   4
  -4 -12   7 16.7825 2.35657   3
  -4  12   7 17.7107 2.87857   3
   3 -12  -7 62.8555 4.74935   2
  -3 -12   7 63.8098 5.42642   4
   3 -12  -7 72.3427 6.17021   4
  -3 -12   7 50.3414 5.38471   2
  -3  12   7 56.6072 5.69665   3
  -2 -12   7 6.78466 1.86092   2
   2 -12  -7 5.15557 1.35273   2
   2 -12  -7 6.69672 2.50966   4
  -2 -12   7 6.20285 1.76383   4
  -2  12   7 5.22500 2.05641   3
  -1 -12   7 4.44941 1.65202   4
  -1 -12   7 1.96817 1.41063   2
   1 -12  -7 4.40075 1.29849   2
  -1  12   7 4.69677 1.89624   3
   0 -12   7 44.3294 4.14168   4
   0 -12   7 41.7766 3.84733   2
   0 -12  -7 45.5077 5.02374   4
   0 -12  -7 40.9932 3.95590   2
   0  12   7 34.7781 4.05227   3
  -1 -12  -7 30.5121 3.72291   2
   1 -12   7 37.5184 4.21958   4
  -1 -12  -7 39.4108 4.61926   4
   1 -12   7 33.8819 3.29458   2
   1  12   7 31.1431 3.54137   3
  -2 -12  -7 145.382 10.8765   2
  -2 -12  -7 132.947 11.4584   4
   2 -12   7 151.154 10.8097   4
   2 -12   7 144.961 10.4829   2
   2  12   7 121.074 10.4792   3
   3 -12   7 6.28807 1.49194   2
   3 -12   7 7.83009 1.77010   4
  -3 -12  -7 5.68805 2.17230   2
  -3 -12  -7 6.72011 2.79837   4
   3  12   7 7.23128 1.67812   3
   4 -12   7 1.92363 1.07777   2
  -4 -12  -7 1.09764 2.22991   2
  -4 -12  -7 4.14481 2.40189   4
   4 -12   7 -0.4249 1.32938   4
  -5 -12  -7 18.3975 3.70328   2
  -5 -12  -7 16.7268 3.91373   4
   5 -12   7 22.6343 2.56509   2
   5 -12   7 19.1786 2.72279   4
   6 -12   7 11.3962 2.14914   2
  -6 -12  -7 12.9811 3.59928   4
   7 -12   7 19.3318 2.83838   2
  -7 -12  -7 12.5832 4.11177   4
  -8 -12  -7 21.5712 4.82418   4
   9 -12   7 45.5569 4.49872   2
  -9 -12  -7 27.7875 6.45713   4
   9 -13  -7 11.4734 2.08748   2
  -9 -13   7 1.26263 3.47939   2
  -9 -13   7 7.14675 2.75346   4
  -9  13   7 4.33289 2.83787   3
   8 -13  -7 23.6187 2.66147   2
  -8 -13   7 13.9005 3.83152   2
  -8 -13   7 22.2461 3.64486   4
  -8  13   7 18.9019 3.71905   3
  -7 -13   7 4.61337 2.03324   4
   7 -13  -7 3.00998 1.42488   2
  -7 -13   7 1.52555 4.53795   2
  -7  13   7 2.90359 3.22477   3
   6 -13  -7 8.90194 1.49486   2
  -6 -13   7 7.70522 2.17385   4
  -6 -13   7 5.62236 2.71567   2
  -6  13   7 9.38419 2.68557   3
  -5 -13   7 16.5998 2.83221   4
   5 -13  -7 19.4088 2.05267   2
  -5 -13   7 14.0088 3.12392   2
  -5  13   7 15.2218 3.14841   3
   4 -13  -7 11.9784 3.09385   4
  -4 -13   7 11.9234 2.15217   3
  -4 -13   7 15.2860 2.57613   4
  -4 -13   7 6.27762 2.22965   2
   4 -13  -7 13.6375 1.81401   2
  -4  13   7 10.1445 2.77276   3
   3 -13  -7 29.3340 2.87514   2
  -3 -13   7 37.9940 3.65469   4
  -3 -13   7 23.1691 3.72551   2
  -3  13   7 30.6053 3.89750   3
  -2 -13   7 16.1283 2.61100   4
   2 -13  -7 12.1494 3.19898   4
   2 -13  -7 13.8225 1.86883   2
  -2 -13   7 9.94725 2.34573   2
  -2  13   7 10.7295 2.66344   3
   1 -13  -7 72.3589 6.76541   4
   1 -13  -7 67.2964 5.58488   2
  -1 -13   7 69.0046 5.85242   4
  -1 -13   7 61.9441 5.69255   2
  -1  13   7 62.6521 6.03027   3
   0 -13  -7 51.5371 5.19398   2
   0 -13   7 57.2102 4.97048   2
   0 -13  -7 56.9643 6.23586   4
   0 -13   7 63.9954 5.27426   4
   0  13   7 53.4516 5.33701   3
  -1 -13  -7 49.9534 5.08926   2
   1 -13   7 59.5903 4.89673   4
   1 -13   7 54.3407 4.59383   2
  -1 -13  -7 45.7404 5.75220   4
   1  13   7 43.9174 4.77768   3
  -2 -13  -7 12.2564 2.93669   2
  -2 -13  -7 11.8292 3.23702   4
   2 -13   7 17.8432 2.54386   4
   2 -13   7 21.2253 2.36116   2
   2  13   7 13.5224 2.52634   3
  -3 -13  -7 19.5082 3.69127   2
  -3 -13  -7 21.9553 3.75841   4
   3 -13   7 20.1240 2.97384   4
   3 -13   7 21.5816 2.54365   2
  -4 -13  -7 18.9934 4.31345   2
  -4 -13  -7 22.3462 4.20290   4
   4 -13   7 22.5718 3.47994   4
   4 -13   7 25.8397 2.82351   2
  -5 -13  -7 7.58336 3.23402   2
   5 -13   7 10.9479 2.00048   4
   5 -13   7 6.62976 1.70574   2
  -5 -13  -7 5.44446 3.34390   4
   6 -13   7 36.1933 3.71930   2
  -6 -13  -7 32.3012 5.60211   4
  -7 -13  -7 5.29223 5.02424   4
  -8 -13  -7 19.1823 5.32665   4
   8 -13   7 18.0593 2.95948   2
  -8 -14   7 23.1338 4.67856   2
   8 -14  -7 31.4427 3.22429   2
  -8  14   7 27.0376 4.83281   3
  -7 -14   7 25.5298 3.74954   4
   7 -14  -7 27.0733 2.82807   2
  -7  14   7 20.5994 4.11535   3
   6 -14  -7 16.6465 2.11588   2
  -6 -14   7 10.5209 3.28352   2
  -6  14   7 7.90649 3.53366   3
   5 -14  -7 2.85222 1.22872   2
  -5 -14   7 -0.7964 1.60384   4
  -5 -14   7 -0.5920 2.17782   2
  -5  14   7 0.87919 2.63590   3
  -4 -14   7 27.3611 3.53218   4
  -4 -14   7 27.1703 3.39520   3
  -4 -14   7 18.2646 3.61590   2
   4 -14  -7 29.3229 3.07733   2
   4 -14  -7 18.7018 4.00807   4
  -4  14   7 27.2296 4.13757   3
  -3 -14   7 13.9104 2.58304   4
   3 -14  -7 7.80435 3.02946   4
   3 -14  -7 10.4365 1.76653   2
  -3 -14   7 5.99442 2.22414   2
  -3  14   7 10.7698 3.02075   3
   2 -14  -7 3.31484 1.60743   2
   2 -14  -7 2.88172 2.79891   4
  -2 -14   7 3.27054 1.74491   2
  -2 -14   7 6.90226 1.99541   4
  -2  14   7 8.50070 2.55925   3
   1 -14  -7 29.1977 4.56334   4
  -1 -14   7 35.5886 3.69775   2
   1 -14  -7 35.3575 3.71728   2
  -1 -14   7 33.4457 3.81079   4
  -1  14   7 25.3380 3.88183   3
   0 -14   7 32.4515 3.92464   4
   0 -14  -7 34.3474 4.16687   2
   0 -14  -7 34.4673 4.84888   4
   0 -14   7 33.2462 3.55184   2
   0  14   7 27.0467 3.88486   3
  -1 -14  -7 26.7937 4.53462   4
   1 -14   7 27.7985 3.28071   2
  -1 -14  -7 34.4882 4.32974   2
   1 -14   7 29.2613 3.62488   4
   1  14   7 24.5610 3.80787   3
  -2 -14  -7 7.31442 2.71668   2
  -2 -14  -7 5.41212 2.97567   4
   2 -14   7 7.59830 1.93064   4
   2 -14   7 4.33319 1.53789   2
   2  14   7 1.57835 2.07573   3
  -3 -14  -7 35.2283 4.91214   2
  -3 -14  -7 36.6216 5.47483   4
   3 -14   7 35.2224 3.97323   4
   3 -14   7 37.2075 3.65778   2
  -4 -14  -7 23.4298 4.23691   2
   4 -14   7 26.5936 2.98108   2
   4 -14   7 22.9638 3.37996   4
  -4 -14  -7 20.9337 4.62234   4
   5 -14   7 15.2734 2.59955   4
  -5 -14  -7 20.9109 4.01946   2
  -5 -14  -7 13.7192 4.13377   4
   5 -14   7 12.0585 2.21667   2
   6 -14   7 6.40452 1.91089   2
  -6 -14  -7 -0.4900 4.86523   4
   7 -14   7 25.8406 3.17874   2
  -7 -14  -7 14.1572 5.11382   4
  -6 -15   7 15.9826 3.27865   4
  -6 -15   7 6.66737 3.30915   2
   6 -15  -7 16.5727 2.11565   2
  -6  15   7 11.8372 3.87782   3
  -5 -15   7 7.25049 3.15658   2
  -5 -15   7 7.61029 2.37907   4
   5 -15  -7 10.5914 1.85222   2
  -5  15   7 5.31381 3.60845   3
   4 -15  -7 8.51161 3.40862   4
  -4 -15   7 4.96559 3.13158   2
  -4 -15   7 6.51687 3.69127   4
   4 -15  -7 12.0759 1.95040   2
  -4  15   7 6.16215 3.18343   3
   3 -15  -7 21.4358 2.52729   2
  -3 -15   7 17.2553 2.94609   4
  -3 -15   7 12.4517 3.13947   2
   3 -15  -7 13.3404 4.22484   4
  -3  15   7 13.1367 3.64370   3
  -2 -15   7 -1.3301 1.82082   2
  -2 -15   7 2.98623 1.89566   4
   2 -15  -7 4.97263 3.21630   4
  -2  15   7 -2.7725 2.69885   3
  -1 -15   7 2.86786 1.78447   2
   1 -15  -7 1.37944 3.10517   4
  -1 -15   7 0.92084 1.80035   4
  -1  15   7 -0.6735 2.53636   3
   0 -15   7 8.46379 2.31043   2
   0 -15   7 11.0445 2.64854   4
   0 -15  -7 9.94060 3.77871   4
   0  15   7 9.01977 3.02694   3
  -1 -15  -7 22.7349 5.08102   4
   1 -15   7 25.1599 3.17678   2
  -1 -15  -7 28.3135 4.09999   2
   1 -15   7 26.2300 3.72534   4
   1  15   7 17.4324 4.68555   3
   2 -15   7 27.5045 3.31113   2
   2 -15   7 26.8189 3.78022   4
  -2 -15  -7 25.9241 4.95062   4
  -2 -15  -7 23.9140 4.36017   2
   3 -15   7 28.5824 4.03905   4
  -3 -15  -7 29.9865 5.46526   4
  -3 -15  -7 39.0881 5.31267   2
   3 -15   7 36.3776 3.73472   2
  -4 -15  -7 46.6708 6.51975   2
   4 -15   7 52.2514 5.53266   2
   4 -15   7 50.2564 4.98888   4
  -5 -15  -7 -0.0546 4.36002   4
   5 -15   7 5.98972 1.86497   2
  -5 -15  -7 3.48511 3.80127   2
   6 -15   7 44.2992 4.44570   2
  -6 -15  -7 39.7019 7.12256   4
  -5 -16   7 26.2099 3.98482   4
  -5 -16   7 17.2841 4.05006   2
   5 -16  -7 23.4076 3.13762   2
  -5  16   7 16.9230 4.47263   3
   4 -16  -7 10.9168 2.26917   2
  -4 -16   7 7.50491 2.66493   4
  -4 -16   7 2.57780 2.61197   2
   4 -16  -7 10.9361 3.88181   4
   3 -16  -7 7.49594 3.97237   4
  -3 -16   7 4.58785 2.69718   2
  -3 -16   7 10.8614 2.60735   4
   3 -16  -7 5.87301 2.40495   2
  -3  16   7 7.11583 3.49801   3
  -2 -16   7 9.58561 2.78071   2
   2 -16  -7 6.80948 4.14910   4
   2 -16  -7 11.2789 2.62095   2
  -2  16   7 4.27563 3.56781   3
   1 -16  -7 109.477 8.65165   2
   1 -16  -7 110.515 10.0462   4
  -1 -16   7 103.055 8.79588   4
  -1 -16   7 101.865 8.57406   2
  -1  16   7 79.2185 9.05430   3
   0 -16   7 10.7604 2.71582   4
   0 -16   7 9.39032 2.50252   2
   0 -16  -7 10.7837 3.10560   2
   0 -16  -7 10.8657 3.80766   4
  -1 -16  -7 3.91365 3.44686   4
   1 -16   7 1.94185 1.75764   2
   1 -16   7 3.15500 2.04591   4
  -1 -16  -7 -4.8754 3.04838   2
  -2 -16  -7 15.1291 6.16375   4
   2 -16   7 7.51740 2.41009   4
   2 -16   7 4.98755 2.12287   2
  -2 -16  -7 6.21739 3.76957   2
   3 -16   7 22.2670 3.45228   4
   3 -16   7 16.6521 2.93699   2
  -3 -16  -7 16.6565 4.52485   2
  -3 -16  -7 20.6002 4.69353   4
  -4 -16  -7 15.9598 4.58139   2
   4 -16   7 17.9111 3.12885   4
  -4 -16  -7 19.2774 5.30815   4
   4 -16   7 15.5844 2.65865   2
  -5 -16  -7 4.71879 4.48055   2
   5 -16   7 11.1931 2.40288   2
  -5 -16  -7 13.1408 5.04717   4
   5 -16   7 8.00495 2.63808   4
  -2 -17   7 11.3164 3.33409   2
   2 -17  -7 5.24797 4.34767   4
   2 -17  -7 11.3011 3.35156   2
  -2 -17   7 16.9240 3.15640   4
  -2  17   7 14.3371 4.33487   3
  -1 -17   7 -0.1293 2.10425   2
   1 -17  -7 10.1075 3.28074   2
  -1 -17   7 3.15582 2.44304   4
   1 -17  -7 7.28861 4.29710   4
   0 -17   7 42.6983 5.65245   4
   0 -17  -7 49.5254 6.05889   2
   0 -17   7 42.7524 4.85757   2
  -1 -17  -7 54.6395 8.01977   4
  -1 -17  -7 52.5136 7.21320   2
   1 -17   7 66.8251 5.82723   2
  -2 -17  -7 7.40067 4.37000   4
   2 -17   7 6.16505 2.90494   4
   2 -17   7 3.32784 1.85036   2
  -2 -17  -7 -2.7594 3.98261   2
 -13   0   8 8.83497 2.64671   3
 -12   0   8 25.1533 3.73681   3
 -11   0   8 108.629 8.91149   3
 -10   0   8 40.3057 4.52387   3
  -9   0   8 262.619 19.6044   3
  -8   0   8 91.6750 7.72087   3
  -7   0   8 99.4997 8.33124   3
  -6   0   8 200.379 15.2084   3
  -5   0   8 228.872 17.1566   3
  -4   0   8 394.572 27.6510   3
   4   0  -8 366.300 26.9196   2
  -3   0   8 428.997 33.6245   2
  -3   0   8 501.501 34.2678   3
   3   0  -8 498.440 33.5174   2
   2   0  -8 290.534 19.0034   2
  -2   0   8 234.139 19.0985   2
  -2   0   8 285.223 19.7597   3
  -1   0   8 79.7349 5.77652   2
   1   0  -8 79.6997 5.71003   2
  -1   0   8 79.5577 6.37778   3
   0   0   8 495.965 32.8396   3
   0   0   8 483.997 32.1091   2
   0   0  -8 397.928 32.1096   2
   1   0   8 1131.27 77.4728   3
   1   0   8 1066.18 76.8200   2
   2   0   8 4.50897 0.67323   2
  -2   0  -8 5.26503 1.37904   4
   2   0   8 3.26110 0.63511   5
  -3   0  -8 145.894 11.2404   4
  -4   0  -8 141.155 10.8009   4
  -4   0  -8 136.778 10.0938   5
  -5   0  -8 11.9299 1.49161   5
  -5   0  -8 16.8768 2.33959   4
  -6   0  -8 32.9921 3.15993   5
  -6   0  -8 39.8035 3.95035   4
  -7   0  -8 527.115 35.7880   4
  -7   0  -8 462.051 35.1927   5
  -8   0  -8 10.5267 2.29817   4
  -8   0  -8 12.7564 2.00766   5
  -9   0  -8 68.1187 5.87052   5
 -10   0  -8 51.0994 4.87019   5
 -11   0  -8 3.58150 1.47026   5
 -12   0  -8 5.09142 1.68424   5
 -13   0  -8 25.3862 3.65595   5
 -13  -1   8 -0.0826 2.05154   3
 -13   1   8 1.12189 2.36449   3
 -12  -1   8 7.30176 2.28894   3
 -12   1   8 6.17240 2.36771   3
 -11  -1   8 3.10267 1.90465   3
 -11   1   8 1.32229 1.84480   3
 -10  -1   8 42.8922 4.43741   3
 -10   1   8 42.6827 4.57309   3
  -9  -1   8 10.4564 2.23316   3
  -9   1   8 10.3900 2.41417   3
  -8  -1   8 0.33262 1.16702   4
  -8  -1   8 2.16020 1.65508   3
  -8   1   8 3.11378 1.67901   3
  -7  -1   8 50.0146 5.14866   3
  -7   1   8 59.0954 5.30785   3
  -6  -1   8 52.0477 4.87541   3
  -6   1   8 50.9573 4.92191   3
  -5  -1   8 36.9799 3.50342   3
  -5  -1   8 33.7516 3.22396   2
  -5   1   8 30.1109 3.58554   3
  -4  -1   8 7.89036 1.68322   3
   4  -1  -8 8.43177 1.32243   2
  -4  -1   8 9.38138 1.45329   2
  -4   1   8 9.21529 1.84392   3
  -3  -1   8 13.4741 1.80722   3
  -3  -1   8 9.53192 1.34947   2
   3  -1  -8 8.78896 1.12446   2
  -3   1   8 13.3564 2.08121   3
  -2  -1   8 61.1673 5.12908   3
  -2  -1   8 57.0854 4.66247   2
   2  -1  -8 65.7197 4.45231   2
   2   1  -8 66.9036 4.63007   2
  -2   1   8 54.3691 4.56745   2
  -2   1   8 63.9592 5.25204   3
  -1  -1   8 348.365 26.0554   3
  -1  -1   8 376.087 25.5083   2
   1   1  -8 368.274 25.4684   2
  -1   1   8 353.467 26.1339   3
   0  -1  -8 489.472 33.1111   4
   0  -1   8 472.974 32.2751   2
   0  -1   8 455.503 32.8959   3
   0   1   8 464.250 32.9175   3
   0   1  -8 420.466 32.2850   2
   1  -1   8 1444.20 100.567   5
  -1  -1  -8 1508.23 101.384   4
   1  -1   8 1428.68 100.576   2
   1   1   8 1344.52 100.501   2
   1   1   8 1467.88 101.178   3
   2  -1   8 529.145 38.2133   2
  -2  -1  -8 574.606 39.0062   4
   2   1   8 565.868 38.7738   3
   2   1   8 508.084 38.2688   5
   3  -1   8 25.2932 2.36380   2
  -3  -1  -8 28.7259 3.14316   4
  -3   1  -8 31.6223 2.33036   5
  -4  -1  -8 204.849 15.4756   4
  -4  -1  -8 205.856 14.7773   5
  -5  -1  -8 13.7739 1.56515   5
  -5  -1  -8 17.4985 2.76750   4
  -5   1  -8 13.6038 1.58705   5
  -6  -1  -8 94.1856 7.18464   5
  -6  -1  -8 98.4153 7.86231   4
  -6   1  -8 87.7558 7.13362   5
  -7  -1  -8 0.05479 0.62590   5
  -7  -1  -8 0.13673 1.43175   4
  -7   1  -8 3.84065 1.08641   5
  -8  -1  -8 9.03752 2.31755   4
  -8  -1  -8 9.51832 1.77577   5
  -8   1  -8 8.89504 1.74752   5
  -9  -1  -8 39.5119 4.49952   4
  -9  -1  -8 35.6672 3.70590   5
 -10  -1  -8 27.2552 3.15461   5
 -10   1  -8 22.3673 3.00030   5
 -11  -1  -8 10.4243 2.10301   5
 -11   1  -8 4.57211 1.65607   5
 -12  -1  -8 32.2299 3.98103   5
 -12   1  -8 32.5946 4.02848   5
 -13  -1  -8 10.4465 2.47830   5
 -13   1  -8 6.57446 2.19998   5
 -13  -2   8 18.9037 3.37995   3
 -13   2   8 22.9604 3.87876   3
 -12  -2   8 10.6471 2.45144   3
 -12   2   8 7.61172 2.43039   3
 -11  -2   8 72.7487 6.37158   3
 -11   2   8 69.1110 6.54722   3
 -10  -2   8 12.3031 2.35912   3
 -10  -2   8 11.1188 1.84923   4
 -10   2   8 10.9577 2.64960   3
  -9  -2   8 37.8751 3.86899   3
  -9  -2   8 35.3747 3.58111   4
  -9   2   8 35.5140 4.14892   3
  -8  -2   8 16.8453 2.46545   4
  -8  -2   8 18.1630 2.78226   3
  -8   2   8 21.6713 2.89100   3
  -7  -2   8 65.1322 5.69227   3
  -7  -2   8 60.9446 5.14756   4
  -7   2   8 63.7272 5.74580   3
  -6  -2   8 5.08649 1.41612   2
  -6  -2   8 3.97829 1.44926   3
  -6   2   8 1.57790 1.60968   3
  -5  -2   8 36.5084 3.51175   3
  -5  -2   8 30.9856 3.25972   2
  -5   2   8 32.6080 3.58415   3
  -4  -2   8 79.6080 6.40520   2
  -4  -2   8 89.3621 6.76113   3
   4  -2  -8 70.4261 6.10098   2
  -4   2   8 93.2762 7.06594   3
  -3  -2   8 139.425 10.2926   2
   3  -2  -8 132.982 9.99805   2
  -3  -2   8 148.240 10.7012   3
  -2  -2   8 22.2203 2.19112   2
  -2  -2   8 23.9674 2.51403   3
   2   2  -8 27.8464 2.09585   2
  -2   2   8 28.6038 2.88227   3
  -1  -2   8 295.726 20.4534   2
   1  -2  -8 280.176 21.0816   4
  -1  -2   8 271.950 20.9496   3
   1   2  -8 291.039 20.4308   2
  -1   2   8 306.742 21.1898   3
   0  -2   8 135.319 9.36413   2
   0  -2  -8 137.275 10.1264   4
   0  -2   8 130.553 9.93323   3
   0   2  -8 121.589 9.37797   2
   0   2   8 131.551 10.0129   3
   1  -2   8 136.096 10.4239   5
  -1  -2  -8 157.877 11.3342   4
   1  -2   8 155.144 10.5391   2
  -1   2  -8 126.069 10.5188   2
   1   2   8 168.873 11.1736   3
   2  -2   8 85.9587 6.84161   2
  -2  -2  -8 98.3556 7.57165   4
   2   2   8 98.6988 7.35379   3
   3  -2   8 27.7187 2.58299   2
  -3  -2  -8 31.8585 3.30111   4
  -3   2  -8 33.9482 2.49348   5
   3   2   8 32.3074 2.98269   3
  -4  -2  -8 137.199 9.19012   5
  -4  -2  -8 129.073 9.87964   4
   4  -2   8 109.528 9.13194   2
   4   2   8 134.454 9.61985   3
  -4   2  -8 114.803 9.03733   5
  -5  -2  -8 3.24998 0.83550   5
  -5  -2  -8 5.54790 1.30609   4
  -5   2  -8 4.54069 0.92873   5
  -6  -2  -8 59.8064 4.59666   5
  -6  -2  -8 56.8668 5.31173   4
  -6   2  -8 49.4408 4.43763   5
  -7  -2  -8 22.5516 3.18281   4
  -7  -2  -8 20.2010 2.29530   5
  -7   2  -8 16.3178 2.19480   5
  -8  -2  -8 8.99275 1.65297   5
  -8  -2  -8 6.24188 2.25551   4
  -8   2  -8 7.65396 1.57045   5
  -9  -2  -8 5.55529 1.54668   5
  -9  -2  -8 6.70509 2.40162   4
  -9   2  -8 5.96434 1.69773   5
 -10  -2  -8 114.977 8.95932   4
 -10  -2  -8 94.5194 8.11717   5
 -10   2  -8 92.1302 8.07532   5
 -11  -2  -8 18.3572 3.02268   5
 -11   2  -8 19.3797 3.02558   5
 -12  -2  -8 33.4445 3.86176   5
 -12   2  -8 25.9757 3.79104   5
 -13  -2  -8 11.6784 2.59122   5
 -13   2  -8 9.99227 2.62865   5
 -13  -3   8 1.50869 2.11623   3
 -13   3   8 2.92608 2.49140   3
 -12  -3   8 7.17028 2.37800   3
 -12   3   8 5.50956 2.36233   3
 -11  -3   8 29.7676 3.47218   3
 -11  -3   8 29.7310 3.60981   4
 -11   3   8 34.7245 4.09097   3
 -10  -3   8 12.3002 1.96536   4
 -10  -3   8 10.1199 2.22952   3
 -10   3   8 5.73426 2.25778   3
  -9  -3   8 33.8196 3.39581   4
  -9  -3   8 31.3297 3.59173   3
  -9   3   8 31.9596 3.95999   3
  -8  -3   8 94.1832 8.25126   3
  -8  -3   8 106.325 7.94854   4
  -8   3   8 109.501 9.78271   3
  -7  -3   8 0.04559 1.19520   4
  -7  -3   8 1.13033 1.41007   2
  -7  -3   8 2.36971 1.56748   3
  -7   3   8 2.86111 1.63969   3
  -6  -3   8 26.6563 2.83857   4
  -6  -3   8 27.3828 3.22082   2
  -6  -3   8 30.0232 3.27190   3
  -6   3   8 30.5970 3.40180   3
  -5  -3   8 36.6278 3.83383   2
  -5  -3   8 42.3456 4.05204   3
  -5   3   8 49.4791 4.43218   3
  -4  -3   8 33.9766 3.27787   3
   4  -3  -8 31.1027 2.83678   2
  -4  -3   8 30.5064 3.12738   2
  -4   3   8 40.5912 3.81114   3
  -3  -3   8 15.1227 1.86527   3
  -3  -3   8 12.6642 1.73583   2
  -3   3   8 17.5611 2.62308   3
  -2  -3   8 71.3093 5.63143   2
   2  -3  -8 71.9621 6.08986   4
  -2  -3   8 70.3178 5.98403   3
  -2   3   8 87.6135 6.48392   3
   1  -3  -8 115.714 9.30190   4
  -1  -3   8 125.393 8.73135   2
  -1  -3   8 112.400 9.15919   3
  -1   3   8 127.575 9.49549   3
   0  -3  -8 112.669 8.87205   4
   0  -3   8 112.708 8.17252   2
   0   3   8 114.310 8.82574   3
   1  -3   8 66.8369 5.01600   2
  -1  -3  -8 66.9007 5.71955   4
   1   3   8 69.5986 5.59795   3
   2  -3   8 213.155 15.7126   2
  -2  -3  -8 226.109 16.4354   4
   2   3   8 222.424 16.1728   3
   3  -3   8 129.192 9.66381   2
  -3  -3  -8 136.448 10.3556   4
   3   3   8 126.349 9.75947   2
   3   3   8 137.359 10.0545   3
  -3   3  -8 133.093 9.47167   5
  -4  -3  -8 133.294 9.93007   4
   4  -3   8 121.327 9.22451   2
   4   3   8 136.145 9.62993   3
  -4   3  -8 112.517 9.04243   5
  -5  -3  -8 240.632 17.5769   4
   5  -3   8 224.399 16.9682   2
  -5  -3  -8 252.408 16.9757   5
  -5   3  -8 210.976 16.7943   5
   5   3   8 245.365 17.2977   3
  -6  -3  -8 45.6191 3.88934   5
  -6  -3  -8 46.0945 4.61786   4
   6   3   8 44.8096 4.23807   3
  -7  -3  -8 235.083 17.1503   5
  -7  -3  -8 232.366 17.7007   4
  -8  -3  -8 69.0919 6.44618   5
  -8  -3  -8 66.3800 6.40406   4
  -9  -3  -8 23.5996 2.92477   5
  -9  -3  -8 26.6121 3.90187   4
 -10  -3  -8 3.26823 2.27170   4
 -10  -3  -8 1.39070 1.26978   5
 -11  -3  -8 6.55777 1.88784   5
 -12  -3  -8 16.3896 2.76188   5
 -12   3  -8 17.9032 3.00804   5
 -13  -3  -8 30.4516 3.85394   5
 -13   3  -8 25.8581 4.69381   5
 -13   4   8 6.58221 2.76373   3
 -12  -4   8 3.04584 1.82404   3
 -12   4   8 3.64076 2.28675   3
[truncated: 396,999 more chars]
