# Supplementary material for: 1-(3-(2-(Dimethylammonio)ethyl)-1H-indol-5-yl)- N-Methylmethanesulfonamide Succinate Hemi(Ethanol Solvate)
Source: Preprints.org preprint supplement (doi:10.20944/preprints202312.1010.v1), 2023-12-13
Supplement: Supplementary file 3 [file supplementary › molbank-2737826-supplementary/SumSucc.mol]

KingDraw KingDraw.mol
KingDraw2D

 31 30  0  0  0  0  0  0  0  0999 V2000
    8.2201   -5.5229    0.0000 C   0  0  0  0  0  0  0  0  0  0  0  0
    8.4049   -4.9542    0.0000 C   0  0  0  0  0  0  0  0  0  0  0  0
    8.9898   -4.8299    0.0000 O   0  0  0  0  0  0  0  0  0  0  0  0
    4.1514   -4.1423    0.0000 C   0  0  0  0  0  0  0  0  0  0  0  0
    4.5959   -3.8856    0.0000 C   0  0  0  0  0  0  0  0  0  0  0  0
    5.0404   -4.1423    0.0000 C   0  0  0  0  0  0  0  0  0  0  0  0
    5.4850   -3.8856    0.0000 C   0  0  0  0  0  0  0  0  0  0  0  0
    5.4850   -3.3723    0.0000 O   0  0  0  0  0  0  0  0  0  0  0  0
    5.9295   -4.1423    0.0000 O   0  0  0  0  0  0  0  0  0  0  0  0
    4.1514   -4.6556    0.0000 O   0  0  0  0  0  0  0  0  0  0  0  0
    3.6812   -3.8856    0.0000 O   0  0  0  0  0  0  0  0  0  0  0  0
    3.4827   -6.3565    0.0000 N   0  0  0  0  0  0  0  0  0  0  0  0
    4.0331   -5.9676    0.0000 S   0  0  0  0  0  0  0  0  0  0  0  0
    3.7764   -5.5231    0.0000 O   0  0  0  0  0  0  0  0  0  0  0  0
    4.2897   -6.4121    0.0000 O   0  0  0  0  0  0  0  0  0  0  0  0
    4.4776   -5.7109    0.0000 C   0  0  0  0  0  0  0  0  0  0  0  0
    4.9221   -5.9676    0.0000 C   0  0  0  0  0  0  0  0  0  0  0  0
    5.3667   -5.7109    0.0000 C   0  0  0  0  0  0  0  0  0  0  0  0
    5.8112   -5.9676    0.0000 C   0  0  0  0  0  0  0  0  0  0  0  0
    6.2993   -5.8090    0.0000 C   0  0  0  0  0  0  0  0  0  0  0  0
    6.6011   -6.2242    0.0000 C   0  0  0  0  0  0  0  0  0  0  0  0
    6.2993   -6.6395    0.0000 N   0  0  0  0  0  0  0  0  0  0  0  0
    5.8112   -6.4809    0.0000 C   0  0  0  0  0  0  0  0  0  0  0  0
    5.3667   -6.7375    0.0000 C   0  0  0  0  0  0  0  0  0  0  0  0
    4.9221   -6.4809    0.0000 C   0  0  0  0  0  0  0  0  0  0  0  0
    6.4580   -5.3208    0.0000 C   0  0  0  0  0  0  0  0  0  0  0  0
    6.9600   -5.2141    0.0000 C   0  0  0  0  0  0  0  0  0  0  0  0
    7.1187   -4.7259    0.0000 N   0  0  0  0  0  0  0  0  0  0  0  0
    6.5371   -4.2386    0.0000 C   0  0  0  0  0  0  0  0  0  0  0  0
    7.6472   -4.2488    0.0000 C   0  0  0  0  0  0  0  0  0  0  0  0
    3.0424   -5.9861    0.0000 C   0  0  0  0  0  0  0  0  0  0  0  0
  1  2  1  0
  2  3  1  0
  4  5  1  0
  5  6  1  0
  6  7  1  0
  7  8  2  0
  7  9  1  0
  4 10  2  0
  4 11  1  0
 12 13  1  0
 13 14  2  0
 13 15  2  0
 13 16  1  0
 16 17  1  0
 18 17  2  0
 19 18  1  0
 20 19  1  0
 21 20  2  0
 22 21  1  0
 22 23  1  0
 24 23  1  0
 25 24  2  0
 17 25  1  0
 19 23  2  0
 20 26  1  0
 26 27  1  0
 27 28  1  0
 28 29  1  0
 28 30  1  0
 12 31  1  0
M  CHG  2   9  -1  28   1
M  END
